# Supplementary material for: Cross-species Transcriptomics Analysis Highlights Conserved Molecular Responses to Per- and Polyfluoroalkyl Substances (PFAS)
Source: Preprints.org preprint supplement (doi:10.20944/preprints202306.0413.v1), 2023-06-06
Supplement: Supplementary file 1 [file SupplementaryFileS1.xlsx]

## Sheet: Mouse
Mouse gene	Human gene
Aaas	AAAS
Aagab	AAGAB
Aamdc	AAMDC
Aar2	AAR2
Aatf	AATF
Abca2	ABCA2
Abcc8	ABCC8
Abce1	ABCE1
Abcf1	ABCF1
Abcf2	ABCF2
Abhd10	ABHD10
Abhd12	ABHD12
Abhd13	ABHD13
Abhd17b	ABHD17B
Abi1	ABI1
Abitram	ABITRAM
Ablim1	ABLIM1
Acad9	ACAD9
Acads	ACADS
Acadsb	ACADSB
Acat1	ACAT1
Acat2	ACAT2
Acbd7	ACBD7
Accs	ACCS
Aco1	ACO1
Aco2	ACO2
Acot11	ACOT11
Acnat2	ACOT2
Acp5	ACP5
Acp6	ACP6
Acsbg2	ACSBG2
Acsl3	ACSL3
Acsl5	ACSL5
Actb	ACTB
Actn1	ACTN1
Actn3	ACTN3
Actr1b	ACTR1B
Actr10	ACTR10
Actr5	ACTR5
Actr6	ACTR6
Adad2	ADAD2
Adam10	ADAM10
Adarb1	ADARB1
Adat2	ADAT2
Adcyap1	ADCYAP1
Adcyap1r1	ADCYAP1R1
Add2	ADD2
Add3	ADD3
Adgrb3	ADGRB3
Adgrg1	ADGRG1
Adgrl2	ADGRL2
Adgrl3	ADGRL3
Adh1	ADH1C
Adipor2	ADIPOR2
Adnp2	ADNP2
Adpgk	ADPGK
Adprm	ADPRM
Adsl	ADSL
Adss	ADSS2
Afdn	AFDN
Aff2	AFF2
Aga	AGA
Agfg1	AGFG1
Agtrap	AGTRAP
Ahcyl1	AHCYL1
Ahsa1	AHSA1
Aifm1	AIFM1
Aig1	AIG1
Aimp1	AIMP1
Ak1	AK1
Ak2	AK2
Ak4	AK4
Ak5	AK5
Ak6	AK6
Akap11	AKAP11
Akap17b	AKAP17A
Akap9	AKAP9
Akirin1	AKIRIN1
Akirin2	AKIRIN2
Akr1a1	AKR1A1
Akr1b3	AKR1B1
Akr7a5	AKR7A2
Akt2	AKT2
Akt3	AKT3
Aktip	AKTIP
Alad	ALAD
Alas1	ALAS1
Alas2	ALAS2
Aldh16a1	ALDH16A1
Aldh18a1	ALDH18A1
Aldh2	ALDH2
Aldh3a2	ALDH3A2
Aldh3b1	ALDH3B1
Aldh3b2	ALDH3B2
Aldh6a1	ALDH6A1
Aldh7a1	ALDH7A1
Aldoart2	ALDOA
Aldob	ALDOB
Aldoc	ALDOC
Alg1	ALG1
Alg14	ALG14
Alg8	ALG8
Alkbh2	ALKBH2
Alkbh3	ALKBH3
Alkbh7	ALKBH7
Alkbh8	ALKBH8
Alox5	ALOX5
Alpk3	ALPK3
Alyref	ALYREF
Amacr	AMACR
Ambp	AMBP
Amer2	AMER2
Ammecr1	AMMECR1
Anapc13	ANAPC13
Anapc15	ANAPC15
Anapc16	ANAPC16
Anapc7	ANAPC7
Angptl3	ANGPTL3
Ank	ANKH
Ankhd1	ANKHD1-EIF4EBP3
Ankrd12	ANKRD12
Ankrd13d	ANKRD13D
Ankrd46	ANKRD46
Ankrd49	ANKRD49
Ankrd52	ANKRD52
Anks1b	ANKS1B
Ankzf1	ANKZF1
Anp32a	ANP32A
Anp32b	ANP32B
Anxa13	ANXA13
Anxa1	ANXA1
Anxa2	ANXA2
Anxa3	ANXA3
Anxa5	ANXA5
Ap1g1	AP1G1
Ap1m1	AP1M1
Ap1m2	AP1M2
Ap1s3	AP1S3
Ap2a1	AP2A1
Ap2m1	AP2M1
Ap2s1	AP2S1
Ap3b2	AP3B2
Ap3d1	AP3D1
Ap3m2	AP3M2
Ap3s2	AP3S2
Ap4b1	AP4B1
Ap5z1	AP5Z1
Apc2	APC2
Apex1	APEX1
Apex2	APEX2
Aph1b	APH1B
Api5	API5
Aplnr	APLNR
Aplp1	APLP1
Aplp2	APLP2
Apmap	APMAP
Apoa1	APOA1
Apob	APOB
Apoc2	APOC2
Apod	APOD
Apoe	APOE
Apoo	APOO
Apool	APOOL
Aprt	APRT
Aptx	APTX
Aqp1	AQP1
Ar	AR
Araf	ARAF
Arcn1	ARCN1
Arf1	ARF1
Arf4	ARF4
Arf5	ARF5
Arfgap2	ARFGAP2
Arfgap3	ARFGAP3
Arfgef1	ARFGEF1
Arg2	ARG2
Arhgap11a	ARHGAP11A
Arhgap12	ARHGAP12
Arhgap17	ARHGAP17
Arhgap19	ARHGAP19
Arhgap21	ARHGAP21
Arhgap24	ARHGAP24
Arhgap29	ARHGAP29
Arhgap45	ARHGAP45
Arhgef12	ARHGEF12
Arhgef15	ARHGEF15
Arhgef18	ARHGEF18
Arhgef39	ARHGEF39
Arhgef3	ARHGEF3
Arhgef7	ARHGEF7
Arid1a	ARID1A
Arid2	ARID2
Arid4a	ARID4A
Arl1	ARL1
Arl13b	ARL13B
Arl14ep	ARL14EP
Arl16	ARL16
Arl2	ARL2
Arl3	ARL3
Arl4d	ARL4D
Arl6ip1	ARL6IP1
Arl6ip5	ARL6IP5
Arl5b	ARL5B
Arl8b	ARL8B
Arl9	ARL9
Armc1	ARMC1
Armc8	ARMC8
Armt1	ARMT1
Arpc1b	ARPC1B
Arpc3	ARPC3
Arpc4	ARPC4
Arpc5	ARPC5
Arpp19	ARPP19
Arrb2	ARRB2
Arrdc1	ARRDC1
Arsa	ARSA
Arsb	ARSB
Arsk	ARSK
Arvcf	ARVCF
Asah1	ASAH1
Asap1	ASAP1
Asap2	ASAP2
Asb12	ASB12
Asb13	ASB13
Asb2	ASB2
Asb6	ASB6
Asf1a	ASF1A
Asgr2	ASGR2
Ash2l	ASH2L
Asl	ASL
Aspscr1	ASPSCR1
Asrgl1	ASRGL1
Ass1	ASS1
Atad1	ATAD1
Atad2	ATAD2
Atad3a	ATAD3A
Ate1	ATE1
Atf1	ATF1
Atf2	ATF2
Atf4	ATF4
Atg101	ATG101
Atg13	ATG13
Atg16l1	ATG16L1
Atg2a	ATG2A
Atic	ATIC
Atm	ATM
Atn1	ATN1
Atp1a1	ATP1A1
Atp1a3	ATP1A3
Atp1b1	ATP1B1
Atp1b3	ATP1B3
Atp1b4	ATP1B4
Atp23	ATP23
Atp2a1	ATP2A1
Atp2a2	ATP2A2
Atp2b1	ATP2B1
Atp2b3	ATP2B3
Atp2b4	ATP2B4
Atp2c1	ATP2C1
Atp5b	ATP5F1B
Atp5c1	ATP5F1C
Atp5d	ATP5F1D
Atp5a1	ATP5F1A
Atpif1	ATP5IF1
Atp5l	ATP5MG
Atp5g1	ATP5MC1
Atp5g3	ATP5MC3
Atp5md	ATP5MK
Atp5k	ATP5ME
Atp5j2	ATP5MF
Atp5pb	ATP5PB
Atp5h	ATP5PD
Atp5j	ATP5PF
Atp5o	ATP5PO
Atp6v0a1	ATP6V0A1
Atp6v0a2	ATP6V0A2
Atp6v0b	ATP6V0B
Atp6v0c	ATP6V0C
Atp6v0d1	ATP6V0D1
Atp6v1a	ATP6V1A
Atp6v1b2	ATP6V1B2
Atp6v1c1	ATP6V1C1
Atp6v1d	ATP6V1D
Atp6v1e1	ATP6V1E1
Atp6v1f	ATP6V1F
Atp6v1h	ATP6V1H
Atp7a	ATP7A
Atpaf1	ATPAF1
Atpaf2	ATPAF2
Atrx	ATRX
Atxn7l3	ATXN7L3
Auh	AUH
Aurkaip1	AURKAIP1
Aurkb	AURKB
B3gnt2	B3GNT2
B3gnt8	B3GNT8
B4galnt3	B4GALNT3
B4gat1	B4GAT1
B9d1	B9D1
B9d2	B9D2
Bag2	BAG2
Bag6	BAG6
Baiap2l1	BAIAP2L1
Banf1	BANF1
Bard1	BARD1
Bax	BAX
Baz1a	BAZ1A
Baz1b	BAZ1B
Baz2a	BAZ2A
Bbox1	BBOX1
Bbs5	BBS5
Bcap31	BCAP31
Bcas2	BCAS2
Bckdha	BCKDHA
Bckdhb	BCKDHB
Bcl11a	BCL11A
Bcl2l1	BCL2L1
Bok	BOK
Bcl9	BCL9
Bcs1l	BCS1L
Bdh2	BDH2
Bet1	BET1
Bet1l	BET1L
Bhlhe40	BHLHE40
Bicd2	BICD2
Birc5	BIRC5
Birc6	BIRC6
Blmh	BLMH
Bloc1s1	BLOC1S1
Bloc1s2	BLOC1S2
Bloc1s4	BLOC1S4
Bloc1s5	BLOC1S5
Blvrb	BLVRB
Bmp15	BMP15
Bmp4	BMP4
Bmp7	BMP7
Bmp8a	BMP8A
Bnip1	BNIP1
Bnip3	BNIP3
Boc	BOC
Bod1	BOD1
Bod1l	BOD1L1
Bola1	BOLA1
Bola3	BOLA3
Bop1	BOP1
Borcs7	BORCS7
Borcs8	BORCS8
Bpgm	BPGM
Bptf	BPTF
Brd1	BRD1
Brd2	BRD2
Brd3	BRD3
Brd4	BRD4
Brd7	BRD7
Brd8	BRD8
Bri3	BRI3
Bricd5	BRICD5
Brinp1	BRINP1
Brk1	BRK1
Brms1l	BRMS1L
Brpf3	BRPF3
Brwd1	BRWD1
Bsdc1	BSDC1
Btbd10	BTBD10
Btbd2	BTBD2
Btf3	BTF3
Btf3l4	BTF3L4
Btg1	BTG1
Btg4	BTG4
Trim17	TRIM17
Trim80	TRIM25
Bub1	BUB1
Bub3	BUB3
Bud23	BUD23
Bud31	BUD31
Brix1	BRIX1
Bysl	BYSL
Bzw1	BZW1
C9orf72	C9orf72
Gm527	C14orf28
C1d	C1D
C1galt1	C1GALT1
C1galt1c1	C1GALT1C1
C1qbp	C1QBP
C1qtnf6	C1QTNF6
Cdcp2	CDCP2
C2cd5	C2CD5
C3	C3
C8b	C8B
C9	C9
Car4	CA4
Car7	CA7
Cab39	CAB39
Cab39l	CAB39L
Cabin1	CABIN1
Cacna1d	CACNA1D
Cacna1s	CACNA1S
Cacna2d1	CACNA2D1
Cacnb4	CACNB4
Cacybp	CACYBP
Cad	CAD
Cadm1	CADM1
Cadm4	CADM4
Calcoco1	CALCOCO1
Cald1	CALD1
Calm2	CALM2
Calr	CALR
Calu	CALU
Camk1d	CAMK1D
Camk2a	CAMK2A
Camk2g	CAMK2G
Camk2n2	CAMK2N2
Camsap1	CAMSAP1
Camsap2	CAMSAP2
Camta1	CAMTA1
Cant1	CANT1
Capg	CAPG
Capn2	CAPN2
Capns1	CAPNS1
Caprin1	CAPRIN1
Capza1	CAPZA1
Capzb	CAPZB
Carhsp1	CARHSP1
Cartpt	CARTPT
Casc3	CASC3
Casp3	CASP3
Casp9	CASP9
Cat	CAT
Cblb	CBLB
Cbln1	CBLN1
Cbr1	CBR1
Cbx3	CBX3
Cbx5	CBX5
Cbx8	CBX8
Cby1	CBY1
Ccdc102a	CCDC102A
Ccdc115	CCDC115
Ccdc12	CCDC12
Ccdc124	CCDC124
Ccdc126	CCDC126
Ccdc13	CCDC13
Ccdc130	YJU2B
Ccdc149	CCDC149
Ccdc167	CCDC167
Ccdc173	CCDC173
Ccdc174	CCDC174
Ccdc22	CCDC22
Ccdc28b	CCDC28B
Ccdc32	CCDC32
Ccdc43	CCDC43
Ccdc47	CCDC47
Ccdc58	MIX23
Ccdc62	CCDC62
Ccdc6	CCDC6
Ccdc77	CCDC77
Ccdc85c	CCDC85C
Ccdc97	CCDC97
Ccna2	CCNA2
Ccnb1	CCNB1
Ccnb2	CCNB2
Ccnb3	CCNB3
Ccnd2	CCND2
Ccne2	CCNE2
Ccng1	CCNG1
Ccng2	CCNG2
Ccnh	CCNH
Ccni	CCNI
Ccnj	CCNJ
Ccnl1	CCNL1
Ccnt1	CCNT1
Ccny	CCNY
Ccnyl1	CCNYL1
Cct2	CCT2
Cct4	CCT4
Cct5	CCT5
Cct6a	CCT6A
Cct7	CCT7
Cct8	CCT8
Cd2bp2	CD2BP2
Cd59b	CD59
Cd63	CD63
Cd82	CD82
Cd99l2	CD99L2
Cd9	CD9
Cdan1	CDAN1
Cdc123	CDC123
Cdc14a	CDC14A
Cdc14b	CDC14B
Cdc20	CDC20
Cdc23	CDC23
Cdc25a	CDC25A
Cdc27	CDC27
Cdc37	CDC37
Cdc40	CDC40
Cdc42	CDC42
Cdc42bpa	CDC42BPA
Rhoq	RHOQ
Cdc45	CDC45
Cdc5l	CDC5L
Cdc73	CDC73
Cdca7	CDCA7
Cdca8	CDCA8
Cdh1	CDH1
Cdh18	CDH18
Cdh2	CDH2
Cdk1	CDK1
Cdk10	CDK10
Cdk11b	CDK11B
Cdk13	CDK13
Cdk14	CDK14
Cdk2	CDK2
Cdk2ap2	CDK2AP2
Cdk4	CDK4
Cdk5r1	CDK5R1
Cdk5rap1	CDK5RAP1
Cdk5rap3	CDK5RAP3
Cdk6	CDK6
Cdk7	CDK7
Cdkn2aipnl	CDKN2AIPNL
Cdkn2d	CDKN2D
Cdkn3	CDKN3
Cdpf1	CDPF1
Cds1	CDS1
Cds2	CDS2
Cdt1	CDT1
Cdv3	CDV3
Cdx1	CDX1
Cebpb	CEBPB
Cebpd	CEBPD
Cecr2	CECR2
Celf2	CELF2
Celf3	CELF3
Celf5	CELF5
Cenpe	CENPE
Cenpl	CENPL
Cenpn	CENPN
Cenps	CENPS
Cenpw	CENPW
Cep135	CEP135
Cep170b	CEP170B
Cep55	CEP55
Cep70	CEP70
Cep83	CEP83
Cers5	CERS5
Cetn2	CETN2
Cetn3	CETN3
Cfap20	CFAP20
Cfap298	CFAP298
Cfap410	CFAP410
F13b	F13B
Cfl1	CFL1
Cfl2	CFL2
Cga	CGA
Cgnl1	CGNL1
Chac1	CHAC1
Chaf1a	CHAF1A
Chaf1b	CHAF1B
Chchd10	CHCHD10
Chchd2	CHCHD2
Chchd3	CHCHD3
Chchd4	CHCHD4
Chd2	CHD2
Chd4	CHD4
Chd5	CHD5
Chd6	CHD6
Chd7	CHD7
Chfr	CHFR
Chia1	CHIA
Chic1	CHIC1
Chic2	CHIC2
Tle5	TLE5
Chmp1b	CHMP1B
Chmp2a	CHMP2A
Chmp4c	CHMP4C
Chmp5	CHMP5
Chmp6	CHMP6
Chmp7	CHMP7
Chordc1	CHORDC1
Chp1	CHP1
Chpf2	CHPF2
Chrac1	CHRAC1
Chrna4	CHRNA4
Chrnb1	CHRNB1
Has2	HAS2
Chst14	CHST14
Chtf18	CHTF18
Chtf8	CHTF8
Chtop	CHTOP
Chuk	CHUK
Churc1	CHURC1
Ciao1	CIAO1
Ciao2b	CIAO2B
Cib1	CIB1
Cidea	CIDEA
Cip2a	CIP2A
Cirbp	CIRBP
Cited4	CITED4
Ckap5	CKAP5
Ckb	CKB
Ckm	CKM
Cks1b	CKS1B
Clasp2	CLASP2
Clasrp	CLASRP
Clcn1	CLCN1
Clcn3	CLCN3
Clcn7	CLCN7
Cldn10	CLDN10
Cldn19	CLDN19
Cldn7	CLDN7
Cldn4	CLDN4
Cldn6	CLDN6
Clic5	CLIC5
Clint1	CLINT1
Clip1	CLIP1
Clk4	CLK4
Clns1a	CLNS1A
Clock	CLOCK
Clp1	CLP1
Clpb	CLPB
Clpp	CLPP
Clptm1	CLPTM1
Clrn2	CLRN2
Clstn1	CLSTN1
Clta	CLTA
Clu	CLU
Cluh	CLUH
Clybl	CLYBL
Cmc1	CMC1
Cmss1	CMSS1
Cnbp	CNBP
Cndp2	CNDP2
Cnep1r1	CNEP1R1
Kcnh4	KCNH4
Cnih1	CNIH1
Cnksr3	CNKSR3
Cnn1	CNN1
Cnot1	CNOT1
Cnot10	CNOT10
Cnot11	CNOT11
Cnot2	CNOT2
Cnot3	CNOT3
Cnot4	CNOT4
Cnot7	CNOT7
Cnot8	CNOT8
Cnot9	CNOT9
Cnp	CNP
Cnpy2	CNPY2
Cnpy3	CNPY3
Cnpy4	CNPY4
Cnst	CNST
Ccna1	CCNA1
Cntn5	CNTN5
Cntnap4	CNTNAP4
Coa3	COA3
Coa5	COA5
Coasy	COASY
Cog1	COG1
Cog4	COG4
Cog5	COG5
Col11a1	COL11A1
Col14a1	COL14A1
Col1a1	COL1A1
Col1a2	COL1A2
Col4a2	COL4A2
Commd3	COMMD3
Commd4	COMMD4
Commd5	COMMD5
Commd8	COMMD8
Comtd1	COMTD1
Copa	COPA
Copb1	COPB1
Copb2	COPB2
Cope	COPE
Copg2	COPG2
Cops2	COPS2
Cops4	COPS4
Cops5	COPS5
Cops7a	COPS7A
Copz1	COPZ1
Coq10b	COQ10B
Coq2	COQ2
Coq5	COQ5
Coq6	COQ6
Coq8a	COQ8A
Coq9	COQ9
Cox11	COX11
Cox4i1	COX4I1
Cox5a	COX5A
Cox5b	COX5B
Cox6a2	COX6A2
Cox6b2	COX6B2
Cox7a2	COX7A2
Cox7b	COX7B
Cp	CP
Cpe	CPE
Cpeb1	CPEB1
Cplx4	CPLX4
Cpn1	CPN1
Cpne5	CPNE5
Cpne8	CPNE8
Cps1	CPS1
Cpsf1	CPSF1
Cpsf3	CPSF3
Cpt2	CPT2
Cptp	CPTP
Cpvl	CPVL
Crabp1	CRABP1
Cradd	CRADD
Crat	CRAT
Crbn	CRBN
Crcp	CRCP
Creb1	CREB1
Creg2	CREG2
Crhbp	CRHBP
Crhr1	CRHR1
Crip2	CRIP2
Cript	CRIPT
Crkl	CRKL
Crls1	CRLS1
Crmp1	CRMP1
Crnkl1	CRNKL1
Crp	CRP
Crtac1	CRTAC1
Crtc1	CRTC1
Cryba2	CRYBA2
Cryz	CRYZ
Cs	CS
Csad	CSAD
Csde1	CSDE1
Cse1l	CSE1L
Csgalnact1	CSGALNACT1
Csgalnact2	CSGALNACT2
Eef1aknmt	METTL13
Csnk1a1	CSNK1A1
Csnk1d	CSNK1D
Csnk1g2	CSNK1G2
Csnk2a1	CSNK2A1
Csnk2a2	CSNK2A2
Csnk2b	CSNK2B
Cspp1	CSPP1
Csrnp1	CSRNP1
Cstb	CSTB
Cstf1	CSTF1
Ctbs	CTBS
Ctdnep1	CTDNEP1
Cth	CTH
Zfp36l1	ZFP36L1
Ctif	CTIF
Ctnnb1	CTNNB1
Ctps	CTPS1
Ctsb	CTSB
Ctsd	CTSD
Ctsl	CTSV
Ctsz	CTSZ
Cttn	CTTN
Ctu1	CTU1
Ctu2	CTU2
Cul1	CUL1
Cul2	CUL2
Cul3	CUL3
Cutc	CUTC
Cwc15	CWC15
Cwc22	CWC22
Cwc25	CWC25
Cwc27	CWC27
Cwf19l2	CWF19L2
Gja4	GJA4
Cxxc1	CXXC1
Cxxc4	CXXC4
Cxxc5	CXXC5
Cyb561a3	CYB561A3
Cyb5b	CYB5B
Cyb5r3	CYB5R3
Cybc1	CYBC1
Cyc1	CYC1
Cycs	CYCS
Cygb	CYGB
Cyp19a1	CYP19A1
Cyp1a1	CYP1A1
Cyp1b1	CYP1B1
Cyp24a1	CYP24A1
Cyp26a1	CYP26A1
Cyp2j11	CYP2J2
Cyp2b19	CYP2B6
Cyp2g1	CYP2C8
Cyp2j8	CYP2J2
Cyp2u1	CYP2U1
Cyp3a25	CYP3A43
Cyp51	CYP51A1
Cyp8b1	CYP8B1
Cyth3	CYTH3
Czib	CZIB
Dad1	DAD1
Dap3	DAP3
Dapk1	DAPK1
Dazap1	DAZAP1
Dazap2	DAZAP2
Dazl	DAZL
Dbnl	DBNL
Dcaf13	DCAF13
Dcaf17	DCAF17
Dcaf7	DCAF7
Dck	DCK
Dclre1a	DCLRE1A
Dctn4	DCTN4
Dctn5	DCTN5
Dctpp1	DCTPP1
Dcun1d1	DCUN1D1
Dcun1d5	DCUN1D5
Dcxr	DCXR
Dda1	DDA1
Ddb1	DDB1
Ddb2	DDB2
Ddit3	DDIT3
Ddx1	DDX1
Ddx18	DDX18
Ddx20	DDX20
Ddx24	DDX24
Ddx27	DDX27
Ddx39a	DDX39A
Ddx3x	DDX3X
Ddx4	DDX4
Ddx43	DDX43
Ddx49	DDX49
Ddx5	DDX5
Ddx52	DDX52
Ddx54	DDX54
Ddx55	DDX55
Ddx56	DDX56
Decr1	DECR1
Decr2	DECR2
Dedd	DEDD
Degs1	DEGS1
Dennd2c	DENND2C
Dennd2d	DENND2D
Dennd4a	DENND4A
Dennd5a	DENND5A
Dennd5b	DENND5B
Denr	DENR
Dera	DERA
Derl1	DERL1
Derl2	DERL2
Det1	DET1
Dexi	DEXI
Dffb	DFFB
Dgcr8	DGCR8
Dgkz	DGKZ
Dhcr7	DHCR7
Dhfr	DHFR
Dhh	DHH
Dhrs11	DHRS11
Wwox	WWOX
Dhrs3	DHRS3
Dhrs4	DHRS4
Dhrs7b	DHRS7B
Rdh16f2	RDH16
Dhx15	DHX15
Dhx32	DHX32
Dhx34	DHX34
Dhx38	DHX38
Diablo	DIABLO
Diaph2	DIAPH2
Dicer1	DICER1
Dido1	DIDO1
Dimt1	DIMT1
Dip2a	DIP2A
Dipk2b	DIPK2B
Diras1	DIRAS1
Disc1	DISC1
Disp1	DISP1
Dkc1	DKC1
Dkk3	DKK3
Dld	DLD
Dlg1	DLG1
Dlg2	DLG2
Dlst	DLST
Dmap1	DMAP1
Dmgdh	DMGDH
Dnah5	DNAH5
Dnah11	DNAH11
Dnaja1	DNAJA1
Dnaja2	DNAJA2
Dnaja3	DNAJA3
Dnajb12	DNAJB12
Dnajb4	DNAJB4
Dnajb6	DNAJB6
Dnajc11	DNAJC11
Dnajc12	DNAJC12
Dnajc14	DNAJC14
Dnajc15	DNAJC15
Dnajc17	DNAJC17
Dnajc18	DNAJC18
Dnajc2	DNAJC2
Dnajc28	DNAJC28
Dnajc30	DNAJC30
Dnajc3	DNAJC3
Dnajc5	DNAJC5
Dnajc5g	DNAJC5G
Dnajc7	DNAJC7
Dnajc8	DNAJC8
Dnajc9	DNAJC9
Dnal1	DNAL1
Dnal4	DNAL4
Dnase1l3	DNASE1L3
Dnd1	DND1
Dnlz	DNLZ
Dnmt1	DNMT1
Dnmt3a	DNMT3A
Dnttip2	DNTTIP2
Dock1	DOCK1
Dock4	DOCK4
Dop1a	DOP1A
Dpcd	DPCD
Dpf1	DPF1
Dpf2	DPF2
Dph2	DPH2
Dph7	DPH7
Dpm3	DPM3
Dpp6	DPP6
Dpp9	DPP9
Dpy30	DPY30
Dpyd	DPYD
Dpys	DPYS
Drg1	DRG1
Drg2	DRG2
Prrxl1	DRGX
Dscam	DSCAM
Dscc1	DSCC1
Dst	DST
Dtnbp1	DTNBP1
Dtwd2	DTWD2
Dtx2	DTX2
Dtymk	DTYMK
Dus4l	DUS4L
Dusp1	DUSP1
Dusp2	DUSP2
Dusp22	DUSP22
Dusp23	DUSP23
Dusp3	DUSP3
Dusp4	DUSP4
Dusp5	DUSP5
Dut	DUT
Dync1i2	DYNC1I2
Dynll2	DYNLL2
Dynlt1c	DYNLT1
Dynlt3	DYNLT3
Dyrk1a	DYRK1A
E2f1	E2F1
E2f4	E2F4
Ebag9	EBAG9
Ebna1bp2	EBNA1BP2
Ebp	EBP
Ece1	ECE1
Ech1	ECH1
Echs1	ECHS1
Ect2	ECT2
Edc3	EDC3
Edc4	EDC4
Edf1	EDF1
Edrf1	EDRF1
Eed	EED
Eef1a1	EEF1A1
Eef1a2	EEF1A2
Eef1akmt1	EEF1AKMT1
Eef1akmt2	EEF1AKMT2
Eef1d	EEF1D
Eef1e1	EEF1E1
Eef1g	EEF1G
Eef2	EEF2
Eef2k	EEF2K
Eef2kmt	EEF2KMT
Efcab11	EFCAB11
Efcab7	EFCAB7
Efemp2	EFEMP2
Efhc1	EFHC1
Efna3	EFNA3
Efr3a	EFR3A
Efr3b	EFR3B
Eftud2	EFTUD2
Egln2	EGLN2
Ehd3	EHD3
Eif1	EIF1
Eif1ad	EIF1AD
Eif1ax	EIF1AX
Eif2b1	EIF2B1
Eif2b2	EIF2B2
Eif2b3	EIF2B3
Eif2b4	EIF2B4
Eif2b5	EIF2B5
Eif2d	EIF2D
Eif2s1	EIF2S1
Eif2s2	EIF2S2
Eif2s3x	EIF2S3
Eif3b	EIF3B
Eif3c	EIF3C
Eif3d	EIF3D
Eif3e	EIF3E
Eif3f	EIF3F
Eif3g	EIF3G
Eif3i	EIF3I
Eif3j2	EIF3J
Eif3k	EIF3K
Eif3l	EIF3L
Eif4a1	EIF4A1
Eif4a2	EIF4A2
Eif4a3	EIF4A3
Eif4b	EIF4B
Eif4e	EIF4E
Eif4e2	EIF4E2
Eif4e3	EIF4E3
Eif4ebp3	EIF4EBP3
Eif4enif1	EIF4ENIF1
Eif4g1	EIF4G1
Eif4g2	EIF4G2
Eif4g3	EIF4G3
Eif4h	EIF4H
Eif5	EIF5
Eif5a	EIF5A
Eif5b	EIF5B
Eipr1	EIPR1
Cela2a	CELA2A
Ctrc	CTRC
Elac1	ELAC1
Elac2	ELAC2
Elavl1	ELAVL1
Elavl3	ELAVL3
Ell	ELL
Elmo1	ELMO1
Eloa	ELOA
Elob	ELOB
Eloc	ELOC
Elof1	ELOF1
Elovl3	ELOVL3
Elovl7	ELOVL7
Elp2	ELP2
Elp3	ELP3
Elp4	ELP4
Elp5	ELP5
Emc10	EMC10
Emc2	EMC2
Emc6	EMC6
Emc8	EMC8
Emc9	EMC9
Emg1	EMG1
Eml2	EML2
Eml4	EML4
Emx1	EMX1
En1	EN1
Enc1	ENC1
Endou	ENDOU
Eno1	ENO1
Eno2	ENO2
Enoph1	ENOPH1
Enpp5	ENPP5
Entpd5	ENTPD5
Entr1	ENTR1
Eny2	ENY2
Eomes	EOMES
Epb41	EPB41
Epb41l4a	EPB41L4A
Epc1	EPC1
Epcam	EPCAM
Epha2	EPHA2
Epha7	EPHA7
Ephb1	EPHB1
Ephx1	EPHX1
Ephx2	EPHX2
Epn1	EPN1
Eppk1	EPPK1
Eral1	ERAL1
Erbin	ERBIN
Ercc1	ERCC1
Ercc8	ERCC8
Erg28	ERG28
Erh	ERH
Ern1	ERN1
Ero1a	ERO1A
Esd	ESD
Espl1	ESPL1
Espn	ESPN
Esr1	ESR1
Esr2	ESR2
Etf1	ETF1
Etfa	ETFA
Etfb	ETFB
Ethe1	ETHE1
Etnk1	ETNK1
Etnk2	ETNK2
Eva1c	EVA1C
Evl	EVL
Exd1	EXD1
Exo1	EXO1
Exoc1	EXOC1
Exoc3	EXOC3
Exoc8	EXOC8
Exosc10	EXOSC10
Exosc2	EXOSC2
Exosc3	EXOSC3
Exosc4	EXOSC4
Exosc5	EXOSC5
Exosc7	EXOSC7
Exosc8	EXOSC8
Exosc9	EXOSC9
Ext2	EXT2
Extl2	EXTL2
Ezr	EZR
F13a1	F13A1
F2	F2
F2r	F2R
F7	F7
F8	F8
Fabp3	FABP3
Pmp2	PMP2
Fabp1	FABP1
Fabp7	FABP7
Fads2	FADS2
Faf2	FAF2
Fahd1	FAHD1
Fahd2a	FAHD2A
Faim2	FAIM2
Faim	FAIM
Pced1b	PCED1B
Fam117a	FAM117A
Fam120a	FAM120A
Fam133b	FAM133B
Fam135a	FAM135A
Fam136a	FAM136A
Fam162a	FAM162A
Fam168b	FAM168B
Fam193a	FAM193A
Fam199x	FAM199X
Fam204a	FAM204A
Fam210a	FAM210A
Fam210b	FAM210B
Fam214a	FAM214A
Fam43a	FAM43A
Fam50a	FAM50A
Fam53b	FAM53B
Fam53c	FAM53C
Fam76b	FAM76B
Fam78b	FAM78B
Fam83d	FAM83D
Fam83f	FAM83F
Fam89a	FAM89A
Fam8a1	FAM8A1
Fancm	FANCM
Far1	FAR1
Farp1	FARP1
Farp2	FARP2
Farsb	FARSB
Fasn	FASN
Fastkd1	FASTKD1
Fastkd3	FASTKD3
Fau	FAU
Gm12248	FAXDC2
1810013L24Rik	C16orf72
Fbl	FBL
Fblim1	FBLIM1
Fbp1	FBP1
Fbrs	FBRS
Fbxl14	FBXL14
Fbxl16	FBXL16
Fbxl18	FBXL18
Fbxl21	FBXL21P
Fbxl4	FBXL4
Fbxl5	FBXL5
Fbxo11	FBXO11
Fbxo22	FBXO22
Fbxo25	FBXO25
Fbxo30	FBXO30
Fbxo43	FBXO43
Fbxo5	FBXO5
Fbxo9	FBXO9
Serp2	SERP2
Fcf1	FCF1
Fcho2	FCHO2
Fdps	FDPS
Fdx1	FDX1
Fdx2	FDX2
Fem1a	FEM1A
Fes	FES
Fetub	FETUB
Fga	FGA
Fgb	FGB
Fgd4	FGD4
Fgf12	FGF12
Fgf17	FGF17
Fgf18	FGF18
Fgfr1	FGFR1
Fgg	FGG
Fh1	FH
Fhl1	FHL1
Fhod3	FHOD3
Ficd	FICD
Figla	FIGLA
Fignl1	FIGNL1
Fis1	FIS1
Fkbp1a	FKBP1A
Fkbp3	FKBP3
Fkbp4	FKBP4
Fkbp6	FKBP6
Fkbp8	FKBP8
Fktn	FKTN
Flnc	FLNC
Flot1	FLOT1
Flot2	FLOT2
Fmn2	FMN2
Fmnl2	FMNL2
Fn1	FN1
Fndc3a	FNDC3A
Fntb	FNTB
Focad	FOCAD
Folr1	FOLR1
Fos	FOS
Foxc1	FOXC1
Foxi3	FOXI3
Foxm1	FOXM1
Foxn2	FOXN2
Foxp1	FOXP1
Foxr2	FOXR2
Fpgs	FPGS
Cmklr1	CMKLR1
Frg1	FRG1
Fsd1	FSD1
Fst	FST
Fstl5	FSTL5
Fth1	FTH1
Ftmt	FTMT
Ftsj1	FTSJ1
Ftsj3	FTSJ3
Fubp1	FUBP1
Fundc1	FUNDC1
Fus	FUS
Fut8	FUT8
Fuz	FUZ
Fxn	FXN
Fxr2	FXR2
Fzd3	FZD3
Fzd7	FZD7
G3bp2	G3BP2
G6pc3	G6PC3
Gaa	GAA
Gabarap	GABARAP
Gabarapl2	GABARAPL2
Gabbr1	GABBR1
Gabpa	GABPA
Gabra6	GABRA6
Gabrb3	GABRB3
Gabrd	GABRD
Gabrg2	GABRG2
Gad1	GAD1
Gad2	GAD2
Gadd45gip1	GADD45GIP1
Gale	GALE
Galk1	GALK1
Galk2	GALK2
Galm	GALM
Galns	GALNS
Galnt17	GALNT17
Galnt2	GALNT2
Galnt9	GALNT9
Galr2	GALR2
Gamt	GAMT
Ganab	GANAB
Gapdh	GAPDH
Gapdhs	GAPDHS
Gatc	GATC
Gatd1	GATD1
Gba	GBA
Gbe1	GBE1
Gcdh	GCDH
Gclc	GCLC
Gcsh	GCSH
Gdap1l1	GDAP1L1
Gdf3	GDF3
Gdi2	GDI2
Gdpd4	GDPD4
Gdpgp1	GDPGP1
Gemin2	GEMIN2
Gemin5	GEMIN5
Gemin7	GEMIN7
Gemin8	GEMIN8
Get1	GRHL3
Get4	GET4
Gfm1	GFM1
Gfm2	GFM2
Gfpt1	GFPT1
Gfra2	GFRA2
Gga1	GGA1
Ggnbp2	GGNBP2
Ggps1	GGPS1
Gh	GH1
Gid8	GID8
Gins4	GINS4
Gipc1	GIPC1
Git2	GIT2
Gkap1	GKAP1
Gla	GLA
Glmp	GLMP
Glo1	GLO1
Glod5	GLOD5
Glrx	GLRX
Glrx3	GLRX3
Glrx5	GLRX5
Glud1	GLUD1
Glul	GLUL
Gmds	GMDS
Gmppa	GMPPA
Gmps	GMPS
Gna15	GNA15
Gnaq	GNAQ
Gnas	GNAS
Gnao1	GNAO1
Gnb1	GNB1
Gnl3	GNL3
Gnl3l	GNL3L
Gnpda1	GNPDA1
Mrps26	MRPS26
Gnrh1	GNRH1
Gnrhr	GNRHR
Gns	GNS
Golga3	GOLGA3
Golga7	GOLGA7
Golgb1	GOLGB1
Golim4	GOLIM4
Golph3	GOLPH3
Gon4l	GON4L
Gorasp2	GORASP2
Got1	GOT1
Gpalpp1	GPALPP1
Gpat4	GPAT4
Gpatch4	GPATCH4
Gpc4	GPC4
Gpd1	GPD1
Gpha2	GPHA2
Gphn	GPHN
Gpi1	GPI
Gpm6b	GPM6B
Gpn1	GPN1
Gpn3	GPN3
Gpr107	GPR107
Gpr108	GPR108
Gpr137	GPR137
Gpr137c	GPR137C
Gpr142	GPR142
Gpr155	GPR155
Gpr157	GPR157
Gpr63	GPR63
Gpr89	GPR89B
Gps2	GPS2
Gpsm2	GPSM2
Gpt	GPT
Gpx1	GPX1
Gpx3	GPX3
Gpx4	GPX4
Gpx7	GPX7
Gpx8	GPX8
Gramd1b	GRAMD1B
Gramd1c	GRAMD1C
Grap	GRAP
Tamalin	TAMALIN
Grhpr	GRHPR
Gria2	GRIA2
Gria3	GRIA3
Grin1	GRIN1
Grin2b	GRIN2B
Grina	GRINA
Grk6	GRK6
Grm6	GRM6
Grn	GRN
Grpel1	GRPEL1
Grsf1	GRSF1
Grtp1	GRTP1
Grwd1	GRWD1
Gsg1l2	GSG1L2
Gsn	GSN
Gspt1	GSPT1
Gsr	GSR
Gss	GSS
Gsta4	GSTA4
Gstk1	GSTK1
Gstm5	GSTM3
Gsto1	GSTO1
Gstt3	GSTT1
Gtdc1	GTDC1
Ston1	STON1
Gtf2b	GTF2B
Gtf2f1	GTF2F1
Gtf2f2	GTF2F2
Gtf2h2	GTF2H2
Gtf2h4	GTF2H4
Gtf3a	GTF3A
Gtf3c6	GTF3C6
Gtpbp4	GTPBP4
Guf1	GUF1
Guk1	GUK1
Gusb	GUSB
Gys1	GYS1
H3f3b	H3-3B
H3f3a	H3-3A
Hacd2	HACD2
Hacd3	HACD3
Hadh	HADH
Hadha	HADHA
Hadhb	HADHB
Hagh	HAGH
Harbi1	HARBI1
Hars	HARS1
Hat1	HAT1
Haus1	HAUS1
Haus4	HAUS4
Haus5	HAUS5
Hax1	HAX1
Hba-a1	HBA2
Hba-x	HBZ
Hbb-bh1	HBE1
Hdac1	HDAC1
Hdac3	HDAC3
Hdac8	HDAC8
Hddc3	HDDC3
Hdlbp	HDLBP
Heatr3	HEATR3
Hectd1	HECTD1
Hectd3	HECTD3
Hecw1	HECW1
Herc2	HERC2
Herpud2	HERPUD2
Hes6	HES6
Hexb	HEXB
Hey1	HEY1
Hgh1	HGH1
Hibadh	HIBADH
Hibch	HIBCH
Hint1	HINT1
Hirip3	HIRIP3
Hk1	HK1
Hmbox1	HMBOX1
Hmces	HMCES
Hmg20a	HMG20A
Hmg20b	HMG20B
Hmgb1	HMGB1
Hmgb2	HMGB2
Hmgcl	HMGCL
Hmgcr	HMGCR
Hmgn2	HMGN2
Hmgxb3	HMGXB3
Hmgxb4	HMGXB4
Hnf4a	HNF4A
Hnrnpa0	HNRNPA0
Hnrnpa1	HNRNPA1
Hnrnpab	HNRNPAB
Hnrnph1	HNRNPH1
Hnrnpl	HNRNPL
Hnrnpm	HNRNPM
Hnrnpr	HNRNPR
Hnrnpul1	HNRNPUL1
Homer3	HOMER3
Hook1	HOOK1
Hp	HP
Hpcal1	HPCAL1
Hpdl	HPDL
Hpf1	HPF1
Hprt	HPRT1
Hps5	HPS5
Hpx	HPX
Hras	HRAS
Hrc	HRC
Hs2st1	HS2ST1
Hsbp1	HSBP1
Hspa1a	HSPA1B
Hsd17b10	HSD17B10
Hsd17b12	HSD17B12
Hsd17b4	HSD17B4
H2-Ke6	HSD17B8
Hsd3b7	HSD3B7
Hsdl2	HSDL2
Hsf2	HSF2
Hspa1l	HSPA1L
Hsp90ab1	HSP90AB1
Hsp90b1	HSP90B1
Hspa14	HSPA14
Hspa4	HSPA4
Hspa8	HSPA8
Hspa9	HSPA9
Hspbp1	HSPBP1
Hspe1	HSPE1
Htatsf1	HTATSF1
Htr1f	HTR1F
Htr2a	HTR2A
Htt	HTT
Huwe1	HUWE1
Hvcn1	HVCN1
Iars2	IARS2
Iba57	IBA57
Id1	ID1
Id2	ID2
Ide	IDE
Idh1	IDH1
Idh3b	IDH3B
Idh3g	IDH3G
Ier2	IER2
Ier3ip1	IER3IP1
Ifrd1	IFRD1
Ift172	IFT172
Ift57	IFT57
Igbp1	IGBP1
Igf1	IGF1
Igf2bp3	IGF2BP3
Igf2r	IGF2R
Igfbp2	IGFBP2
Ighmbp2	IGHMBP2
Igsf10	IGSF10
Ik	IK
Ikzf4	IKZF4
Il6st	IL6ST
Ilf2	ILF2
Ilf3	ILF3
Ilrun	ILRUN
Glipr2	GLIPR2
Mfsd1	MFSD1
Immp1l	IMMP1L
Immt	IMMT
Imp3	IMP3
Imp4	IMP4
Impa1	IMPA1
Impdh2	IMPDH2
Ina	INA
Ing1	ING1
Inip	INIP
Inka1	INKA1
Ino80b	INO80B
Ino80c	INO80C
Ino80d	INO80D
Ino80e	INO80E
Inpp5b	INPP5B
Inpp5f	INPP5F
Ins1	INS
Insr	INSR
Insyn1	INSYN1
Ints14	INTS14
Ints4	INTS4
Ints7	INTS7
Ints8	INTS8
Ints9	INTS9
Ip6k2	IP6K2
Ipo4	IPO4
Ipo7	IPO7
Iqgap1	IQGAP1
Iqgap3	IQGAP3
Irak1bp1	IRAK1BP1
Irak3	IRAK3
Ireb2	IREB2
Irf2bp1	IRF2BP1
Irf3	IRF3
Irf8	IRF8
Irs2	IRS2
Irx4	IRX4
Isca1	ISCA1
Isca2	ISCA2
Iscu	ISCU
Isg20l2	ISG20L2
Isl1	ISL1
Ism1	ISM1
Isy1	ISY1-RAB43
Itfg2	ITFG2
Itgav	ITGAV
Itgb1	ITGB1
Itgb1bp1	ITGB1BP1
Itih2	ITIH2
Itih3	ITIH3
Itm2b	ITM2B
Itm2c	ITM2C
Itpr1	ITPR1
Ivns1abp	IVNS1ABP
Jade3	JADE3
Jag2	JAG2
Jagn1	JAGN1
Jazf1	JAZF1
Josd2	JOSD2
Jph1	JPH1
Jpt1	JPT1
Jpt2	JPT2
Jtb	JTB
Jun	JUN
Junb	JUNB
Jund	JUND
Jup	JUP
Kank1	KANK1
Kansl2	KANSL2
Kansl3	KANSL3
Kat2b	KAT2B
Kat5	KAT5
Kat6a	KAT6A
Kat8	KAT8
Katnal1	KATNAL1
Katnbl1	KATNBL1
Kazn	KAZN
Kbtbd4	KBTBD4
Kbtbd8	KBTBD8
Kcnc3	KCNC3
Kcne4	KCNE4
Kcnh5	KCNH5
Kcnip3	KCNIP3
Kcnj14	KCNJ14
Kcnk4	KCNK4
Kcnk9	KCNK9
Kcnma1	KCNMA1
Kcnn1	KCNN1
Kctd12b	KCTD12
Kctd14	KCTD14
Kctd15	KCTD15
Kctd6	KCTD6
Kctd8	KCTD8
Kdelr3	KDELR3
Kdf1	KDF1
Kdm1a	KDM1A
Kdm5c	KDM5C
Kdm6a	KDM6A
Kdm6b	KDM6B
Kdm8	KDM8
Kdr	KDR
Keap1	KEAP1
Khk	KHK
D430041D05Rik	KIAA1549L
Kif13b	KIF13B
Kif1a	KIF1A
Kif1b	KIF1B
Kif20a	KIF20A
Kif20b	KIF20B
Kif22	KIF22
Kif23	KIF23
Kif2c	KIF2C
Kif3b	KIF3B
Kifap3	KIFAP3
Kifc1	KIFC1
Kifc3	KIFC3
Kin	KIN
Klc1	KLC1
Klf11	KLF11
Klf2	KLF2
Klf6	KLF6
Klf8	KLF8
Klhl11	KLHL11
Klhl12	KLHL12
Klhl13	KLHL13
Klhl20	KLHL20
Klhl8	KLHL8
Kmo	KMO
Kmt2b	KMT2B
Kmt2c	KMT2C
Kmt5a	KMT5A
Kmt5b	KMT5B
Knop1	KNOP1
Knstrn	KNSTRN
Kpna2	KPNA2
Kpna3	KPNA3
Kpna4	KPNA4
Kpna7	KPNA7
Ipo5	IPO5
Kptn	KPTN
Kras	KRAS
Kri1	KRI1
Krr1	KRR1
Krt26	KRT26
Krt8	KRT8
Krt19	KRT19
Krt17	KRT17
Krtcap2	KRTCAP2
Ksr1	KSR1
Kti12	KTI12
Kyat1	KYAT1
Kyat3	KYAT3
L3hypdh	L3HYPDH
L3mbtl2	L3MBTL2
Lactb	LACTB
Lama1	LAMA1
Lama5	LAMA5
Lamp1	LAMP1
Lamtor2	LAMTOR2
Lamtor3	LAMTOR3
Lamtor5	LAMTOR5
Lancl1	LANCL1
Lap3	LAP3
Laptm4a	LAPTM4A
Large2	LARGE2
Larp6	LARP6
Larp7	LARP7
Lasp1	LASP1
Lbh	LBH
Lcorl	LCORL
Lcp1	LCP1
Ldb1	LDB1
Ldha	LDHA
Ldhd	LDHD
Ldlr	LDLR
Lect2	LECT2
Lef1	LEF1
Leng1	LENG1
Lgals8	LGALS8
Lgalsl	LGALSL
Lgmn	LGMN
Lhb	LHB
Lhfpl2	LHFPL2
Lhfpl5	LHFPL5
Lhx6	LHX6
Lhx9	LHX9
Lias	LIAS
Lig1	LIG1
Lig3	LIG3
Lin37	LIN37
Lin54	LIN54
Lin9	LIN9
Lins1	LINS1
Lipe	LIPE
Lipg	LIPG
Liph	LIPH
Lman2	LMAN2
Lmbrd2	LMBRD2
Lmf1	LMF1
Lmo1	LMO1
Lmo3	LMO3
Lmo4	LMO4
Lmtk2	LMTK2
Lmx1b	LMX1B
Lnpk	LNPK
Lnx2	LNX2
Lonp1	LONP1
Loxhd1	LOXHD1
Lpar1	LPAR1
Lpar2	LPAR2
Lrba	LRBA
Lrit1	LRIT1
Lrp2	LRP2
Lrpap1	LRPAP1
Lrrc1	LRRC1
Lrrc20	LRRC20
Lrrc28	LRRC28
Lrrc29	LRRC29
Lrrc3b	LRRC3B
Lrrfip2	LRRFIP2
Lrrtm4	LRRTM4
Lrsam1	LRSAM1
Lsg1	LSG1
Lsm1	LSM1
Lsm12	LSM12
Lsm14b	LSM14B
Lsm6	LSM6
Lsm7	LSM7
Lsm8	LSM8
Lsr	LSR
Lta4h	LTA4H
Ltb4r2	LTB4R2
Ltv1	LTV1
Lxn	LXN
Ly75	LY75
Lyar	LYAR
Lyrm1	LYRM1
Lyrm4	LYRM4
Lysmd1	LYSMD1
Lztr1	LZTR1
Lzts2	LZTS2
Cfap91	CFAP91
Mab21l1	MAB21L1
Maco1	MACO1
Macrod1	MACROD1
Mad2l1	MAD2L1
Mad2l1bp	MAD2L1BP
Maea	MAEA
Maf1	MAF1
Mafg	MAFG
Magi1	MAGI1
Magohb	MAGOHB
Magt1	MAGT1
Mak16	MAK16
Mal2	MAL2
Maml1	MAML1
Man2b1	MAN2B1
Map1a	MAP1A
Map2k1	MAP2K1
Map2k2	MAP2K2
Map2k4	MAP2K4
Map2k6	MAP2K6
Map2k7	MAP2K7
Map3k14	MAP3K14
Map3k7	MAP3K7
Map4k4	MAP4K4
Map7d1	MAP7D1
Map7d2	MAP7D2
Mapk10	MAPK10
Mapk14	MAPK14
Mapk15	MAPK15
Mapk6	MAPK6
Mapk8ip3	MAPK8IP3
Mapkap1	MAPKAP1
Mapre2	MAPRE2
Marcksl1	MARCKSL1
Mark2	MARK2
Marveld3	MARVELD3
Mat1a	MAT1A
Mat2a	MAT2A
Matr3	MATR3
Mbd3	MBD3
Mbd4	MBD4
Mbp	MBP
Mbtps2	MBTPS2
Mc5r	MC5R
Mccc2	MCCC2
Mcee	MCEE
Mcf2l	MCF2L
Mcl1	MCL1
Mcm2	MCM2
Mcm3	MCM3
Mcm4	MCM4
Mcm5	MCM5
Mcm6	MCM6
Mcm7	MCM7
Mcm9	MCM9
Mcmbp	MCMBP
Mcoln1	MCOLN1
Mcoln2	MCOLN2
Mcph1	MCPH1
Mcrs1	MCRS1
Mdh1	MDH1
Mdh2	MDH2
Mdk	MDK
Mdm4	MDM4
Meaf6	MEAF6
Mecr	MECR
Med1	MED1
Med10	MED10
Med13	MED13
Med17	MED17
Med18	MED18
Med19	MED19
Med20	MED20
Med22	MED22
Med23	MED23
Med27	MED27
Med28	MED28
Med30	MED30
Med7	MED7
Med8	MED8
Meis1	MEIS1
Meis2	MEIS2
Melk	MELK
Memo1	MEMO1
Mest	MEST
Metap1	METAP1
Metap1d	METAP1D
Metap2	METAP2
Metrnl	METRNL
Mettl1	METTL1
Mettl16	METTL16
Mettl17	METTL17
Mettl18	METTL18
Mettl23	METTL23
Mettl26	METTL26
Mettl2	METTL2A
Mff	MFF
Mfge8	MFGE8
Mfn2	MFN2
Mfsd4a	MFSD4A
Mfsd5	MFSD5
Mgat1	MGAT1
Mgat2	MGAT2
Mgrn1	MGRN1
Mgst1	MGST1
Mgst3	MGST3
Mr1	MR1
H2-Q1	HLA-A
H2-Oa	HLA-DOA
H2-Ab1	HLA-DQB1
Mia3	MIA3
Nmrk1	NMRK1
Micall1	MICALL1
Micos13	MICOS13
Mid1ip1	MID1IP1
Midn	MIDN
Mief2	MIEF2
Mier1	MIER1
Mif	MIF
Miga1	MIGA1
Mipep	MIPEP
Mknk1	MKNK1
Mknk2	MKNK2
Mkrn1	MKRN1
Mkrn2	MKRN2
Mlh1	MLH1
Mllt10	MLLT10
Mllt11	MLLT11
Mlycd	MLYCD
Mmachc	MMACHC
Mmadhc	MMADHC
Mmgt1	MMGT1
Mnat1	MNAT1
Mnd1	MND1
Mob1b	MOB1B
Mob3a	MOB3A
Mob4	MOB4
Mocs3	MOCS3
Mogat2	MOGAT2
Mogs	MOGS
Mon1a	MON1A
Mon1b	MON1B
Morf4l1	MORF4L1
Mos	MOS
Mospd1	MOSPD1
Mospd2	MOSPD2
Mpc2	MPC2
Mpdu1	MPDU1
Mpg	MPG
Mphosph10	MPHOSPH10
Mphosph6	MPHOSPH6
Pals2	PALS2
Mpped2	MPPED2
Mprip	MPRIP
Mpv17	MPV17
Mpv17l2	MPV17L2
Mrm2	MRM2
Mrpl1	MRPL1
Mrpl10	MRPL10
Mrpl11	MRPL11
Mrpl12	MRPL12
Mrpl13	MRPL13
Mrpl14	MRPL14
Mrpl16	MRPL16
Mrpl17	MRPL17
Mrpl19	MRPL19
Mrpl2	MRPL2
Mrpl20	MRPL20
Mrpl21	MRPL21
Mrpl22	MRPL22
Mrpl24	MRPL24
Mrpl27	MRPL27
Mrpl3	MRPL3
Mrpl30	MRPL30
Mrpl33	MRPL33
Mrpl35	MRPL35
Mrpl38	MRPL38
Mrpl4	MRPL4
Mrpl41	MRPL41
Mrpl45	MRPL45
Mrpl46	MRPL46
Mrpl47	MRPL47
Mrpl48	MRPL48
Mrpl49	MRPL49
Mrpl51	MRPL51
Mrpl52	MRPL52
Mrpl54	MRPL54
Mrpl57	MRPL57
Mrpl9	MRPL9
Mrps10	MRPS10
Mrps11	MRPS11
Mrps14	MRPS14
Mrps15	MRPS15
Mrps17	MRPS17
Mrps18a	MRPS18A
Mrps18c	MRPS18C
Mrps2	MRPS2
Mrps23	MRPS23
Mrps24	MRPS24
Mrps25	MRPS25
Mrps27	MRPS27
Mrps30	MRPS30
Mrps31	MRPS31
Mrps34	MRPS34
Mrps35	MRPS35
Mrps36	MRPS36
Mrps7	MRPS7
Mrrf	MRRF
Mrtfb	MRTFB
Msantd2	MSANTD2
Msh2	MSH2
Msh6	MSH6
Msi2	MSI2
Msl1	MSL1
Msmo1	MSMO1
Msra	MSRA
Mst1	MST1
Mstn	MSTN
Mt2	MT2A
Mta1	MTA1
Mta3	MTA3
Mt4	MT4
Mtbp	MTBP
Mtdh	MTDH
Mterf2	MTERF2
Mterf3	MTERF3
Mtf2	MTF2
Mtfr2	MTFR2
Mtg1	MTG1
Mthfd1l	MTHFD1L
Mthfd2	MTHFD2
Mthfr	MTHFR
Mtmr1	MTMR1
Mtpap	MTPAP
Mtr	MTR
Mtss1	MTSS1
Mtus1	MTUS1
[truncated: 22,451 more rows]

## Sheet: C. elegans
C.elegans gene	Mouse gene	Human gene
Y43F8C.6	0610010K14Rik	C17orf49
Y82E9BR.22	0610012G03Rik	NCBP2AS2
M01E5.4	0610030E20Rik	C2orf68
M01E5.3	0610030E20Rik	C2orf68
T25G3.1	1110059G10Rik	KIAA1143
C48B6.3	1810013L24Rik	C16orf72
B0205.12	1810058I24Rik	STMP1
C11D2.4	2210016F16Rik	C9orf64
mrpl-14	2310009B15Rik	C1orf53
F53F8.5	2310022A10Rik	C19orf47
C27B7.2	2310061I04Rik	C6orf136
C17H12.2	2510039O18Rik	KIAA2013
did-2	2610002M06Rik	CHMP1B
F31C3.3	2610507B11Rik	KIAA0100
C24B5.4	4931406C07Rik	C11orf54
lpd-3	4932438A13Rik	KIAA1109
Y51F10.11	4933434E20Rik	C1orf43
C16E9.2	5031439G07Rik	KIAA0930
lsy-2	5430403G16Rik	ZNF433
tgn-38	9530068E07Rik	C5orf15
sur-5	Aacs	AACS
F16F9.4	Aadacl3	AADACL3
Y71F9AL.12	Aagab	AAGAB
sel-5	Aak1	AAK1
Y111B2A.12	Aamp	AAMP
F10B5.2	Aar2	AAR2
aars-2	Aars	AARS1
aars-1	Aars2	AARS2
W09D6.1	Aasdh	AASDH
T04G9.4	Aasdhppt	AASDHPPT
T28H10.1	Aasdhppt	AASDHPPT
aass-1	Aass	AASS
gta-1	Abat	ABAT
abt-2	Abca1	ABCA1
ced-7	Abca15	ABCA3
abt-5	Abca15	ABCA3
abt-4	Abca3	ABCA3
haf-3	Abcb10	ABCB10
haf-1	Abcb10	ABCB10
pgp-1	Abcb1a	ABCB1
pgp-14	Abcb1a	ABCB1
pgp-9	Abcb1a	ABCB1
pgp-2	Abcb1b	ABCB1
pgp-11	Abcb4	ABCB4
pgp-3	Abcb4	ABCB4
pgp-6	Abcb5	ABCB5
pgp-5	Abcb5	ABCB5
hmt-1	Abcb6	ABCB6
abtm-1	Abcb7	ABCB7
haf-6	Abcb8	ABCB8
haf-4	Abcb9	ABCB9
haf-7	Abcb9	ABCB9
haf-9	Abcb9	ABCB9
haf-2	Abcb9	ABCB9
mrp-4	Abcc1	ABCC1
mrp-8	Abcc1	ABCC1
mrp-1	Abcc1	ABCC1
mrp-3	Abcc1	ABCC1
mrp-7	Abcc3	ABCC3
mrp-2	Abcc3	ABCC3
mrp-6	Abcc4	ABCC4
mrp-5	Abcc5	ABCC5
pmp-4	Abcd2	ABCD2
pmp-2	Abcd3	ABCD3
pmp-1	Abcd3	ABCD3
pmp-3	Abcd4	ABCD4
pmp-5	Abcd4	ABCD4
abce-1	Abce1	ABCE1
abcf-1	Abcf1	ABCF1
abcf-2	Abcf2	ABCF2
abcf-3	Abcf3	ABCF3
wht-5	Abcg1	ABCG1
wht-4	Abcg1	ABCG1
wht-6	Abcg1	ABCG1
wht-8	Abcg2	ABCG2
wht-2	Abcg2	ABCG2
wht-7	Abcg2	ABCG2
abhd-11.2	Abhd11	ABHD11
abhd-12	Abhd12	ABHD12
abhd-14	Abhd14b	ABHD14B
F10D2.10	Abhd14b	ABHD14B
Y73C8B.2	Abhd14b	ABHD14B
F35H12.5	Abhd14b	ABHD14B
K08D9.4	Abhd14b	ABHD14B
F37A4.1	Abhd16a	ABHD16A
Y41E3.18	Abhd17a	ABHD17A
aho-3	Abhd17b	ABHD17B
F01D5.8	Abhd17b	ABHD17B
Y71G12A.4	Abhd17c	ABHD17C
abhd-3.2	Abhd3	ABHD3
abhd-3.1	Abhd3	ABHD3
abhd-5.2	Abhd4	ABHD4
lid-1	Abhd5	ABHD5
abi-1	Abi1	ABI1
F54F2.7	Abitram	ABITRAM
Y47G6A.5	Abl1	ABL1
abl-1	Abl1	ABL1
unc-115	Ablim1	ABLIM1
tag-243	Abra	ABRA
clec-119	Abra	ABRA
F36F2.1	Abra	ABRA
clec-175	Abra	ABRA
F57B10.8	Abt1	ABT1
acaa-2	Acaa2	ACAA2
pod-2	Acaca	ACACA
C04E6.7	Acad10	ACAD10
acds-10	Acad10	ACAD10
acdh-9	Acad8	ACAD8
acdh-13	Acad9	ACAD9
acdh-11	Acad9	ACAD9
acdh-8	Acadm	ACADM
acdh-5	Acads	ACADS
acdh-4	Acadsb	ACADSB
acdh-3	Acadsb	ACADSB
acdh-2	Acadsb	ACADSB
acdh-12	Acadvl	ACADVL
clec-178	Acan	ACAN
cnt-1	Acap2	ACAP2
kat-1	Acat1	ACAT1
R74.8	Acbd3	ACBD3
Y41E3.7	Acbd3	ACBD3
acbp-3	Acbd5	ACBD5
maa-1	Acbd5	ACBD5
H10E21.1	Acbd5	ACBD5
acbp-4	Acbd5	ACBD5
acbp-5	Acbd6	ACBD6
T04F3.1	Accs	ACCS
W02F12.2	Acer2	ACER2
acin-1	Acin1	ACIN1
acly-1	Acly	ACLY
acly-2	Acly	ACLY
acsd-1	Acmsd	ACMSD
aco-1	Aco1	ACO1
aco-2	Aco2	ACO2
T05E7.1	Acot1	ACOT1
C25H3.14	Acot13	ACOT13
F42H10.6	Acot13	ACOT13
C31H5.6	Acot2	ACOT2
W03D8.8	Acot4	ACOT4
F25E2.3	Acot8	ACOT8
Y87G2A.2	Acot8	ACOT8
D2021.4	Acot8	ACOT8
C37H5.13	Acot8	ACOT8
C17C3.1	Acot8	ACOT8
T07D3.9	Acot9	ACOT9
F57F4.1	Acot9	ACOT9
T22B7.7	Acot9	ACOT9
acox-1.3	Acox1	ACOX1
acox-1.2	Acox1	ACOX1
acox-1.6	Acox1	ACOX1
acox-1.4	Acox1	ACOX1
acox-1.5	Acox1	ACOX1
acox-3	Acox3	ACOX3
Y94H6A.7	Acp1	ACP1
pho-5	Acp2	ACP2
pho-13	Acp4	ACP4
F02E9.7	Acp5	ACP5
pho-11	Acp6	ACP6
F26C11.1	Acp6	ACP6
acp-3	Acp6	ACP6
acp-1	Acp6	ACP6
acp-2	Acp6	ACP6
Y105C5B.15	Acp7	ACP7
F21A3.11	Acp7	ACP7
papl-1	Acp7	ACP7
acp-7	Acpp	ACP3
pho-1	Acpp	ACP3
pho-7	Acpp	ACP3
pho-4	Acpp	ACP3
acp-6	Acpp	ACP3
pho-8	Acpp	ACP3
pho-9	Acpp	ACP3
acp-5	Acpp	ACP3
pho-14	Acpp	ACP3
acs-16	Acsf2	ACSF2
acs-14	Acsf2	ACSF2
acs-6	Acsf2	ACSF2
acs-1	Acsf2	ACSF2
acs-2	Acsf2	ACSF2
acs-11	Acsf3	ACSF3
acs-21	Acsf3	ACSF3
acs-4	Acsl4	ACSL4
acs-17	Acsl4	ACSL4
acs-13	Acsl5	ACSL5
acs-5	Acsl5	ACSL5
acs-15	Acsl6	ACSL6
acs-18	Acsl6	ACSL6
acs-10	Acsm2	ACSM2B
acs-12	Acsm2	ACSM2B
acs-7	Acsm4	ACSM4
acs-19	Acss2	ACSS2
act-1	Actb	ACTB
act-3	Actb	ACTB
act-4	Actb	ACTB
act-5	Actb	ACTB
act-2	Actb	ACTB
F42C5.9	Actc1	ACTC1
swsn-6	Actl6b	ACTL6B
atn-1	Actn3	ACTN3
arp-11	Actr10	ACTR10
arp-1	Actr1a	ACTR1A
arx-2	Actr2	ACTR2
daf-1	Acvr1c	ACVR1C
daf-4	Acvr2b	ACVR2B
C44E12.1	Acy1	ACY1
C06A6.4	Acy1	ACY1
C10C5.5	Acy1	ACY1
C10C5.3	Acy1	ACY1
C10C5.4	Acy1	ACY1
sup-17	Adam10	ADAM10
unc-71	Adam12	ADAM12
adm-2	Adam12	ADAM12
adm-4	Adam17	ADAM17
adt-3	Adamts6	ADAMTS6
adt-2	Adamts6	ADAMTS6
mig-17	Adamts7	ADAMTS7
gon-1	Adamts9	ADAMTS9
madd-4	Adamtsl1	ADAMTSL1
adr-1	Adarb2	ADARB2
R13A5.10	Adat2	ADAT2
Y48A6B.7	Adat2	ADAT2
Y47D3A.14	Adat3	ADAT3
D2023.6	Adck1	ADCK1
Y32H12A.7	Adck2	ADCK2
acy-3	Adcy1	ADCY1
acy-4	Adcy5	ADCY5
acy-1	Adcy9	ADCY9
add-1	Add3	ADD3
add-2	Add3	ADD3
F14H12.3	Adgrb1	ADGRB1
mth-1	Adgrg2	ADGRG2
lat-1	Adgrl3	ADGRL3
sodh-1	Adh6a	ADH6
hphd-1	Adhfe1	ADHFE1
K07E1.1	Adi1	ADI1
F42F12.4	Adi1	ADI1
T01D1.4	Adi1	ADI1
col-180	Adipoq	ADIPOQ
col-168	Adipoq	ADIPOQ
col-81	Adipoq	ADIPOQ
Y71G12B.35	Adipor1	ADIPOR1
paqr-2	Adipor2	ADIPOR2
paqr-1	Adipor2	ADIPOR2
Y50D4C.6	Ado	ADO
C50D2.7	Adpgk	ADPGK
rpn-13	Adrm1	ADRM1
adsl-1	Adsl	ADSL
adss-1	Adssl1	ADSS1
Y49E10.10	Aebp1	AEBP1
afd-1	Afdn	AFDN
C30F12.2	Afg1l	AFG1L
spg-7	Afg3l2	AFG3L2
afmd-2	Afmid	AFMID
afmd-1	Afmid	AFMID
Y45G5AM.9	Aftph	AFTPH
R04B3.2	Aga	AGA
cnt-2	Agap3	AGAP3
zig-1	Ager	AGER
Y55D9A.2	Aggf1	AGGF1
F52C9.3	Agk	AGK
agl-1	Agl	AGL
ppw-1	Ago1	AGO1
wago-10	Ago1	AGO1
alg-3	Ago1	AGO1
csr-1	Ago1	AGO1
R06C7.2	Ago1	AGO1
wago-1	Ago1	AGO1
alg-2	Ago2	AGO2
alg-5	Ago2	AGO2
alg-1	Ago2	AGO2
alg-4	Ago4	AGO4
rde-1	Ago4	AGO4
sago-1	Ago4	AGO4
wago-4	Ago4	AGO4
C04F12.1	Ago4	AGO4
nrde-3	Ago4	AGO4
ppw-2	Ago4	AGO4
hrde-1	Ago4	AGO4
ergo-1	Ago4	AGO4
acl-2	Agpat1	AGPAT1
acl-1	Agpat1	AGPAT1
acl-11	Agpat5	AGPAT5
ads-1	Agps	AGPS
agr-1	Agrn	AGRN
ccpp-1	Agtpbp1	AGTPBP1
agxt-1	Agxt	AGXT
T09B4.8	Agxt2	AGXT2
mel-28	Ahctf1	AHCTF1
ahcy-1	Ahcy	AHCY
wah-1	Aifm1	AIFM1
F20D6.11	Aifm3	AIFM3
aipr-1	Aip	AIP
ajm-1	Ajm1	AJM1
F38B2.4	Ak1	AK1
let-754	Ak2	AK2
ZK673.2	Ak3	AK3
E02H1.6	Ak6	AK6
ekl-1	Akap1	AKAP1
akap-1	Akap1	AKAP1
eri-5	Akap1	AKAP1
rgs-5	Akap10	AKAP10
ZK1067.3	Akap14	AKAP14
C35A5.6	Akap7	AKAP7
akir-1	Akirin2	AKIRIN2
K07C5.2	Akr1a1	AKR1A1
Y39G8B.2	Akr1a1	AKR1A1
C01G5.5	Akr1a1	AKR1A1
C07D8.6	Akr1b10	AKR1B10
C35D10.6	Akr1b10	AKR1B10
Y39G8B.1	Akr1b3	AKR1B1
F53F1.2	Akr1b7	AKR1B10
ZK1290.5	Akr1b8	AKR1B10
ZC443.1	Akr1b8	AKR1B10
scd-1	Akr1c6	AKR1C4
akt-1	Akt1	AKT1
akt-2	Akt1	AKT1
alh-13	Aldh18a1	ALDH18A1
alh-3	Aldh1l1	ALDH1L1
alh-1	Aldh2	ALDH2
alh-4	Aldh3a1	ALDH3A1
alh-5	Aldh3a1	ALDH3A1
alh-6	Aldh4a1	ALDH4A1
alh-7	Aldh5a1	ALDH5A1
alh-8	Aldh6a1	ALDH6A1
alh-9	Aldh7a1	ALDH7A1
alh-10	Aldh8a1	ALDH8A1
alh-12	Aldh9a1	ALDH9A1
aldo-2	Aldoa	ALDOA
aldo-1	Aldoc	ALDOC
algn-1	Alg1	ALG1
algn-10	Alg10b	ALG10
algn-12	Alg12	ALG12
algn-14	Alg14	ALG14
algn-2	Alg2	ALG2
algn-3	Alg3	ALG3
algn-5	Alg5	ALG5
algn-6	Alg6	ALG6
algn-8	Alg8	ALG8
alkb-1	Alkbh1	ALKBH1
nmad-1	Alkbh4	ALKBH4
B0564.2	Alkbh6	ALKBH6
alkb-7	Alkbh7	ALKBH7
alkb-8	Alkbh8	ALKBH8
aly-1	Alyref	ALYREF
aly-3	Alyref	ALYREF
aly-2	Alyref	ALYREF
F22E12.1	Ambp	AMBP
smd-1	Amd2	AMD1
F59B2.3	Amdhd2	AMDHD2
hrdl-1	Amfr	AMFR
R166.3	Ammecr1	AMMECR1
fbxa-219	Amn1	AMN1
F59C12.3	Amot	AMOT
ampd-1	Ampd2	AMPD2
gcst-1	Amt	AMT
C50B6.7	Amy2a2	AMY2B
R01B10.3	Amy2a5	AMY2B
apc-10	Anapc10	ANAPC10
Y48G1C.12	Anapc10	ANAPC10
apc-11	Anapc11	ANAPC11
apc-2	Anapc2	ANAPC2
emb-30	Anapc4	ANAPC4
such-1	Anapc5	ANAPC5
angl-1	Angel1	ANGEL1
Y43C5A.2	Angpt2	ANGPT2
C49C8.5	Angpt2	ANGPT2
unc-44	Ank3	ANK3
R07E4.1	Ankfn1	ANKFN1
F22G12.4	Ankfy1	ANKFY1
lem-3	Ankle1	ANKLE1
lem-4	Ankle2	ANKLE2
Y34D9A.3	Ankmy2	ANKMY2
daf-25	Ankmy2	ANKMY2
C01F1.6	Ankrd13c	ANKRD13C
C18F10.7	Ankrd13d	ANKRD13D
mask-1	Ankrd17	ANKRD17
pqn-20	Ankrd26	ANKRD26
R31.2	Ankrd40	ANKRD40
F26F4.12	Ankrd49	ANKRD49
F36D3.5	Ankrd65	ANKRD65
lido-18	Ankrd65	ANKRD65
C01G10.1	Ankrd65	ANKRD65
C18H2.5	Ankrd65	ANKRD65
F26D2.10	Ankrd65	ANKRD65
F37A4.4	Ankrd65	ANKRD65
F31B12.3	Ankrd66	ANKRD66
C11E4.6	Anks1	ANKS1A
mlt-3	Anks3	ANKS3
ani-1	Anln	ANLN
ani-2	Anln	ANLN
ani-3	Anln	ANLN
F33H2.3	Anp32b	ANP32B
T19H12.2	Anp32b	ANP32B
anp-1	Anpep	ANPEP
clec-218	Antxr2	ANTXR2
clec-61	Antxr2	ANTXR2
nex-1	Anxa13	ANXA13
nex-3	Anxa3	ANXA3
nex-2	Anxa7	ANXA7
R74.10	Aoah	AOAH
gad-3	Aox1	AOX1
apb-1	Ap1b1	AP1B1
apg-1	Ap1g1	AP1G1
unc-101	Ap1m1	AP1M1
apm-1	Ap1m2	AP1M2
aps-1	Ap1s2	AP1S2
apa-2	Ap2a2	AP2A2
dpy-23	Ap2m1	AP2M1
aps-2	Ap2s1	AP2S1
apb-3	Ap3b2	AP3B2
apd-3	Ap3d1	AP3D1
apm-3	Ap3m1	AP3M1
aps-3	Ap3s1	AP3S1
ced-4	Apaf1	APAF1
lin-10	Apba2	APBA2
feh-1	Apbb1	APBB1
mig-10	Apbb1ip	APBB1IP
R148.5	Apbb1ip	APBB1IP
apr-1	Apc2	APC2
dpf-4	Apeh	APEH
dpf-7	Apeh	APEH
dpf-6	Apeh	APEH
dpf-5	Apeh	APEH
exo-3	Apex1	APEX1
aph-1	Aph1a	APH1A
T12G3.4	Apmap	APMAP
F57C2.5	Apmap	APMAP
vit-1	Apob	APOB
F07F6.7	Apol7b	APOL3
F07F6.8	Apol7b	APOL3
moma-1	Apool	APOOL
apl-1	App	APP
T19B4.3	Aprt	APRT
aqp-11	Aqp12	AQP12B
aqp-10	Aqp12	AQP12B
aqp-9	Aqp12	AQP12B
aqp-8	Aqp3	AQP3
aqp-1	Aqp3	AQP3
aqp-7	Aqp3	AQP3
aqp-2	Aqp3	AQP3
aqp-4	Aqp8	AQP8
emb-4	Aqr	AQR
F23H11.4	Arap3	ARAP3
copd-1	Arcn1	ARCN1
arf-6	Arf6	ARF6
K02B12.7	Arfgap1	ARFGAP1
agef-1	Arfgef2	ARFGEF2
F54C8.7	Arfip2	ARFIP2
Y54E10BR.2	Arfrp1	ARFRP1
F44E2.3	Arglu1	ARGLU1
rga-4	Arhgap11a	ARHGAP11A
rga-3	Arhgap11a	ARHGAP11A
rga-9	Arhgap20	ARHGAP20
pac-1	Arhgap23	ARHGAP23
T04C9.1	Arhgap26	ARHGAP26
tag-325	Arhgap27	ARHGAP27
spv-1	Arhgap29	ARHGAP29
rga-8	Arhgap44	ARHGAP44
rga-5	Arhgap5	ARHGAP5
rga-1	Arhgap8	ARHGAP8
rhi-1	Arhgdia	ARHGDIA
osg-1	Arhgef17	ARHGEF17
Y105E8A.25	Arhgef2	ARHGEF2
pix-1	Arhgef7	ARHGEF7
let-526	Arid1a	ARID1A
swsn-7	Arid2	ARID2
arid-1	Arid4a	ARID4A
ari-1.3	Arih1	ARIH1
ari-1.4	Arih1	ARIH1
tag-314	Arih1	ARIH1
ari-2	Arih2	ARIH2
arl-1	Arl1	ARL1
evl-20	Arl2	ARL2
arl-5	Arl5a	ARL5A
arl-8	Arl8a	ARL8A
K05C4.7	Armc1	ARMC1
T28F4.4	Armc5	ARMC5
F59G1.4	Armc9	ARMC9
moa-1	Armcx2	ARMCX2
F57C2.4	Armcx6	ARMCX6
F31D4.2	Armt1	ARMT1
aha-1	Arnt2	ARNT2
arx-3	Arpc1b	ARPC1B
arx-4	Arpc2	ARPC2
arx-5	Arpc3	ARPC3
arx-6	Arpc4	ARPC4
arx-7	Arpc5l	ARPC5L
ensa-1	Arpp19	ARPP19
ZK121.2	Arpp21	ARPP21
arr-1	Arrb1	ARRB1
arrd-13	Arrdc2	ARRDC2
arrd-25	Arrdc2	ARRDC2
arrd-7	Arrdc2	ARRDC2
arrd-14	Arrdc3	ARRDC3
ttm-2	Arrdc5	ARRDC5
arrd-10	Arrdc5	ARRDC5
sul-2	Arsa	ARSA
sul-3	Arsb	ARSB
asah-2	Asah1	ASAH1
asah-1	Asah1	ASAH1
swah-1	Asb11	ASB11
K02F6.3	Asb18	ASB18
ascc-1	Ascc1	ASCC1
Y54E2A.4	Ascc3	ASCC3
asfl-1	Asf1a	ASF1A
unc-85	Asf1a	ASF1A
lin-59	Ash1l	ASH1L
C16A11.4	Ash1l	ASH1L
ash-2	Ash2l	ASH2L
del-6	Asic1	ASIC1
acd-2	Asic1	ASIC1
flr-1	Asic1	ASIC1
acd-5	Asic1	ASIC1
del-10	Asic5	ASIC5
dod-18	Asmt	ASMT
asns-2	Asns	ASNS
asns-1	Asns	ASNS
M18.3	Asnsd1	ASNSD1
C27A7.5	Aspg	ASPG
K09A9.6	Asph	ASPH
aspm-1	Aspm	ASPM
asps-1	Aspscr1	ASPSCR1
nas-37	Astl	ASTL
nas-22	Astl	ASTL
nas-30	Astl	ASTL
nas-7	Astl	ASTL
dpy-31	Astl	ASTL
mspn-1	Atad1	ATAD1
lex-1	Atad2	ATAD2
atad-3	Atad3a	ATAD3A
Y53F4B.9	Atad5	ATAD5
mec-17	Atat1	ATAT1
ate-1	Ate1	ATE1
fos-1	Atf2	ATF2
zip-11	Atf4	ATF4
zip-3	Atf4	ATF4
atfs-1	Atf4	ATF4
zip-5	Atf4	ATF4
atf-6	Atf6b	ATF6B
atf-7	Atf7	ATF7
attf-6	Atf7ip	ATF7IP
epg-9	Atg101	ATG101
lgg-3	Atg12	ATG12
atg-13	Atg13	ATG13
epg-8	Atg14	ATG14
atg-16.2	Atg16l1	ATG16L1
atg-16.1	Atg16l2	ATG16L2
atg-2	Atg2a	ATG2A
atg-3	Atg3	ATG3
atg-4.1	Atg4a	ATG4A
atg-4.2	Atg4d	ATG4D
atg-5	Atg5	ATG5
atg-9	Atg9b	ATG9B
atic-1	Atic	ATIC
atln-2	Atl1	ATL1
atln-1	Atl2	ATL2
atm-1	Atm	ATM
C34H4.5	Atmin	ATMIN
cuc-1	Atox1	ATOX1
tat-3	Atp10b	ATP10B
catp-8	Atp13a1	ATP13A1
catp-6	Atp13a3	ATP13A3
catp-5	Atp13a3	ATP13A3
catp-7	Atp13a3	ATP13A3
eat-6	Atp1a3	ATP1A3
nkb-2	Atp1b1	ATP1B1
nkb-1	Atp1b2	ATP1B2
nkb-3	Atp1b2	ATP1B2
sca-1	Atp2a1	ATP2A1
mca-1	Atp2b2	ATP2B2
mca-3	Atp2b2	ATP2B2
mca-2	Atp2b3	ATP2B3
pmr-1	Atp2c1	ATP2C1
catp-1	Atp4a	ATP4A
catp-3	Atp4a	ATP4A
catp-4	Atp4a	ATP4A
atp-1	Atp5a1	ATP5F1A
atp-2	Atp5b	ATP5F1B
Y69A2AR.18	Atp5c1	ATP5F1C
F58F12.1	Atp5d	ATP5F1D
hpo-18	Atp5e	ATP5F1E
Y82E9BR.3	Atp5g1	ATP5MC1
atp-5	Atp5h	ATP5PD
atp-4	Atp5j	ATP5PF
R53.4	Atp5j2	ATP5MF
R04F11.2	Atp5k	ATP5ME
asg-1	Atp5l	ATP5MG
asg-2	Atp5l	ATP5MG
atp-3	Atp5o	ATP5PO
asb-2	Atp5pb	ATP5PB
asb-1	Atp5pb	ATP5PB
vha-19	Atp6ap1	ATP6AP1
T14B4.3	Atp6ap2	ATP6AP2
vha-20	Atp6ap2	ATP6AP2
unc-32	Atp6v0a1	ATP6V0A1
vha-4	Atp6v0b	ATP6V0B
vha-3	Atp6v0c	ATP6V0C
vha-1	Atp6v0c	ATP6V0C
vha-2	Atp6v0c	ATP6V0C
vha-16	Atp6v0d1	ATP6V0D1
vha-17	Atp6v0e	ATP6V0E1
vha-13	Atp6v1a	ATP6V1A
vha-12	Atp6v1b2	ATP6V1B2
spe-5	Atp6v1b2	ATP6V1B2
vha-11	Atp6v1c1	ATP6V1C1
vha-14	Atp6v1d	ATP6V1D
vha-8	Atp6v1e1	ATP6V1E1
vha-9	Atp6v1f	ATP6V1F
vha-10	Atp6v1g1	ATP6V1G1
vha-15	Atp6v1h	ATP6V1H
vha-18	Atp6v1h	ATP6V1H
cua-1	Atp7a	ATP7A
tat-1	Atp8a1	ATP8A1
tat-2	Atp8b2	ATP8B2
tat-5	Atp9b	ATP9B
Y116A8C.27	Atpaf2	ATPAF2
mai-2	Atpif1	ATP5IF1
atl-1	Atr	ATR
atrn-1	Atrnl1	ATRNL1
xnp-1	Atrx	ATRX
K04F10.1	Atxn1l	ATXN1L
atx-2	Atxn2l	ATXN2L
C08B11.9	AU022252	C1orf50
ech-5	Auh	AUH
F44B9.5	Aup1	AUP1
Y54G9A.7	Aurkaip1	AURKAIP1
air-1	Aurkc	AURKC
air-2	Aurkc	AURKC
T26A5.6	Avl9	AVL9
F33G12.3	AW209491	C7orf25
pry-1	Axin1	AXIN1
sqv-2	B3galt6	B3GALT6
glct-6	B3gat1	B3GAT1
sqv-8	B3gat3	B3GAT3
bre-5	B3gnt6	B3GNT6
F13G3.6	B3gntl1	B3GNTL1
bre-4	B4galt2	B4GALT2
W02B12.11	B4galt5	B4GALT5
sqv-3	B4galt7	B4GALT7
bag-1	Bag1	BAG1
unc-23	Bag2	BAG2
ZK688.5	Bag6	BAG6
F54G2.1	Baiap3	BAIAP3
baf-1	Banf1	BANF1
T16G1.9	Bard1	BARD1
brd-1	Bard1	BARD1
ceh-86	Barx1	BARX1
F11E6.3	Basp1	BASP1
athp-2	Baz1a	BAZ1A
baz-2	Baz2a	BAZ2A
gbh-1	Bbox1	BBOX1
T23G11.4	BC005624	C9orf78
K07A1.3	BC024978	C19orf54
F18A11.3	BC031181	C18orf32
Y54G2A.18	Bcap31	BCAP31
bcas-2	Bcas2	BCAS2
F56C9.10	Bcas3	BCAS3
Y44A6D.5	Bcat2	BCAT2
bcat-1	Bcat2	BCAT2
ace-2	Bche	BCHE
bckd-1A	Bckdha	BCKDHA
bckd-1B	Bckdhb	BCKDHB
bcl-11	Bcl11b	BCL11B
ikb-1	Bcl3	BCL3
bcl-7	Bcl7c	BCL7C
bcmo-2	Bco1	BCO1
bcs-1	Bcs1l	BCS1L
B0261.1	Bdp1	BDP1
bec-1	Becn1	BECN1
pot-1	Bend7	BEND7
T19C3.3	Best1	BEST1
best-18	Best1	BEST1
best-22	Best1	BEST1
best-20	Best1	BEST1
best-15	Best1	BEST1
best-11	Best1	BEST1
best-21	Best1	BEST1
best-17	Best1	BEST1
best-14	Best1	BEST1
best-19	Best1	BEST1
best-12	Best1	BEST1
best-5	Best1	BEST1
best-24	Best3	BEST3
best-3	Best3	BEST3
best-7	Best3	BEST3
nbet-1	Bet1	BET1
gld-3	Bicc1	BICC1
bicd-1	Bicd2	BICD2
sydn-1	Bicra	BICRA
Y49E10.29	Bicra	BICRA
mig-38	Bicral	BICRAL
amph-1	Bin1	BIN1
bir-2	Birc5	BIRC5
bir-1	Birc5	BIRC5
Y73E7A.6	Blcap	BLCAP
him-6	Blm	BLM
blos-1	Bloc1s1	BLOC1S1
blos-2	Bloc1s2	BLOC1S2
R12B2.2	Blzf1	BLZF1
toh-1	Bmp1	BMP1
dbl-1	Bmp5	BMP5
tig-2	Bmp8a	BMP8A
K05F1.10	Bmper	BMPER
sma-6	Bmpr1b	BMPR1B
Y61A9LA.10	Bms1	BMS1
sec-20	Bnip1	BNIP1
dct-1	Bnip3	BNIP3
K11H12.1	Bola1	BOLA1
T12D8.10	Bola2	BOLA2
Y105E8A.11	Bola3	BOLA3
daz-1	Boll	BOLL
Y48B6A.1	Bop1	BOP1
spat-1	Bora	BORA
blos-7	Borcs6	BORCS6
blos-8	Borcs7	BORCS7
blos-9	Borcs8	BORCS8
K01A2.5	Bphl	BPHL
F44A2.3	Bpi	BPI
nrf-5	Bpi	BPI
T19C3.5	Bpi	BPI
F10D11.6	Bpifc	BPIFC
C06G1.1	Bpifc	BPIFC
bpnt-1	Bpnt1	BPNT1
C35E7.5	Bptf	BPTF
nurf-1	Bptf	BPTF
lin-45	Braf	BRAF
brap-2	Brap	BRAP
brc-1	Brca1	BRCA1
F13C5.2	Brd2	BRD2
bet-1	Brd2	BRD2
bet-2	Brd4	BRD4
swsn-9	Brd7	BRD7
F59E12.1	Brd8	BRD8
brf-1	Brf1	BRF1
F11G11.5	Bri3	BRI3
T28C6.8	Bri3	BRI3
Y54G2A.50	Brip1	BRIP1
dog-1	Brip1	BRIP1
K12H4.3	Brix1	BRIX1
suds-3	Brms1	BRMS1
lin-49	Brpf1	BRPF1
Y97E10AR.6	Bsdc1	BSDC1
btf-1	Btaf1	BTAF1
btbd-10	Btbd10	BTBD10
F47B10.9	Btbd19	BTBD19
Y54F10AM.11	Btbd19	BTBD19
tag-30	Btbd2	BTBD2
hpo-9	Btbd9	BTBD9
icd-1	Btf3	BTF3
bub-1	Bub1	BUB1
san-1	Bub1b	BUB1B
bub-3	Bub3	BUB3
C27F2.4	Bud23	BUD23
bud-31	Bud31	BUD31
F59C6.12	C030006K11Rik	C8orf82
W09D10.5	C1galt1	C1GALT1
C38H2.2	C1galt1	C1GALT1
cri-3	C1qbp	C1QBP
col-48	C1qtnf7	C1QTNF7
col-40	C1qtnf7	C1QTNF7
ram-2	C1qtnf7	C1QTNF7
sqt-3	C1qtnf7	C1QTNF7
col-14	C1qtnf7	C1QTNF7
col-34	C1qtnf7	C1QTNF7
col-179	C1qtnf7	C1QTNF7
col-129	C1qtnf7	C1QTNF7
col-97	C1qtnf7	C1QTNF7
col-20	C1qtnf7	C1QTNF7
col-160	C1qtnf7	C1QTNF7
col-68	C1qtnf7	C1QTNF7
col-143	C1qtnf7	C1QTNF7
col-107	C1qtnf9	C1QTNF9B
col-167	C1qtnf9	C1QTNF9B
col-12	C1qtnf9	C1QTNF9B
col-166	C1qtnf9	C1QTNF9B
sqt-2	C1qtnf9	C1QTNF9B
col-65	C1qtnf9	C1QTNF9B
col-178	C1qtnf9	C1QTNF9B
col-38	C1qtnf9	C1QTNF9B
col-145	C1qtnf9	C1QTNF9B
col-159	C1qtnf9	C1QTNF9B
col-181	C1qtnf9	C1QTNF9B
col-77	C1qtnf9	C1QTNF9B
col-76	C1qtnf9	C1QTNF9B
rol-8	C1qtnf9	C1QTNF9B
col-73	C1qtnf9	C1QTNF9B
col-101	C1qtnf9	C1QTNF9B
col-186	C1qtnf9	C1QTNF9B
R11G1.6	C2cd2	C2CD2
sue-1	C2cd4a	C2CD4A
F13D2.1	C3	C3
F58H1.7	C7	C7
alfa-1	C9orf72	C9orf72
F15D4.2	Caap1	CAAP1
mop-25.2	Cab39	CAB39
mop-25.3	Cab39	CAB39
mop-25.1	Cab39l	CAB39L
Y71F9B.6	Cables1	CABLES1
F43C9.2	Cabp2	CABP2
unc-2	Cacna1a	CACNA1A
egl-19	Cacna1d	CACNA1D
cca-1	Cacna1i	CACNA1I
unc-36	Cacna2d3	CACNA2D3
ccb-1	Cacnb2	CACNB2
clc-3	Cacng2	CACNG2
cacn-1	Cactin	CACTIN
pyr-1	Cad	CAD
unc-31	Cadps	CADPS
pdfr-1	Calcr	CALCR
seb-2	Calcr	CALCR
cal-1	Calm1	CALM1
tnc-2	Calm1	CALM1
cmd-1	Calm1	CALM1
pat-10	Calm4	CALML5
cal-5	Calm5	CALML5
cal-3	Calm5	CALML5
cal-2	Calm5	CALML5
T09B4.4	Calml4	CALML4
crt-1	Calr	CALR
calu-1	Calu	CALU
unc-43	Camk2d	CAMK2D
ckk-1	Camkk1	CAMKK1
ptrn-1	Camsap3	CAMSAP3
camt-1	Camta2	CAMTA2
cand-1	Cand1	CAND1
apy-1	Cant1	CANT1
cnx-1	Canx	CANX
cas-2	Cap2	CAP2
cas-1	Cap2	CAP2
gsnl-1	Capg	CAPG
clp-6	Capn1	CAPN1
clp-4	Capn2	CAPN2
tra-3	Capn5	CAPN5
clp-2	Capn7	CAPN7
clp-7	Capn8	CAPN8
clp-3	Capn8	CAPN8
clp-1	Capn8	CAPN8
cap-2	Capzb	CAPZB
cah-4	Car5a	CA5A
cah-5	Car7	CA7
cah-3	Car7	CA7
crml-1	Carmil1	CARMIL1
cars-1	Cars	CARS1
lin-2	Cask	CASK
C46H3.2	Caskin1	CASKIN1
ZK795.2	Casp12	CASP12
csp-2	Casp3	CASP3
ced-3	Casp3	CASP3
csq-1	Casq1	CASQ1
ctl-2	Cat	CAT
twk-31	Catsperz	CATSPERZ
cav-2	Cav1	CAV1
cav-1	Cav1	CAV1
Y48C3A.5	Cbarp	CBARP
sli-1	Cbl	CBL
sdz-8	Cbr1	CBR1
dhs-12	Cbr1	CBR1
dhs-31	Cbr1	CBR1
C55A6.7	Cbr1	CBR1
C55A6.3	Cbr3	CBR3
C55A6.6	Cbr3	CBR3
C55A6.4	Cbr3	CBR3
C30G12.2	Cbr3	CBR3
F20G2.2	Cbr3	CBR3
cysl-1	Cbs	CBS
cbs-1	Cbs	CBS
cysl-2	Cbs	CBS
cysl-3	Cbs	CBS
T25D3.3	Cbs	CBS
cbs-2	Cbs	CBS
hpl-2	Cbx3	CBX3
hpl-1	Cbx3	CBX3
heri-1	Cbx4	CBX4
set-31	Cbx4	CBX4
cec-6	Cbx5	CBX5
cec-3	Cbx5	CBX5
H04D03.6	Cbx5	CBX5
cec-1	Cbx7	CBX7
T23B3.5	Ccar1	CCAR1
drd-10	Ccar1	CCAR1
E03H12.5	Ccar1	CCAR1
C35E7.9	Ccar1	CCAR1
T04A8.13	Ccar1	CCAR1
ccar-1	Ccar1	CCAR1
F53F10.1	Ccdc102a	CCDC102A
F02E9.1	Ccdc115	CCDC115
Y73E7A.1	Ccdc124	CCDC124
ZK1307.9	Ccdc130	YJU2B
F56A8.9	Ccdc134	CCDC134
Y41D4B.11	Ccdc137	CCDC137
F21C10.7	Ccdc141	CCDC141
epg-2	Ccdc158	CCDC158
C37A2.8	Ccdc174	CCDC174
sdc-2	Ccdc177	CCDC177
cccp-1	Ccdc186	CCDC186
R08E3.3	Ccdc22	CCDC22
Y54G11A.2	Ccdc25	CCDC25
ccdc-47	Ccdc47	CCDC47
R10H1.1	Ccdc50	CCDC50
ZC477.3	Ccdc51	CCDC51
F10E9.11	Ccdc59	CCDC59
T09B9.4	Ccdc6	CCDC6
eor-2	Ccdc82	CCDC82
Y40B1B.7	Ccdc86	CCDC86
grdn-1	Ccdc88c	CCDC88C
C31E10.5	Ccdc93	CCDC93
C31E10.6	Ccdc93	CCDC93
C16A11.2	Ccdc93	CCDC93
C10G8.8	Ccdc9b	CCDC9B
cya-1	Ccna1	CCNA1
T24A6.1	Ccna1	CCNA1
T07F10.5	Ccna1	CCNA1
T12C9.7	Ccna2	CCNA2
cyb-2.2	Ccnb2	CCNB2
cyb-2.1	Ccnb2	CCNB2
cyb-1	Ccnb2	CCNB2
cyb-3	Ccnb3	CCNB3
cic-1	Ccnc	CCNC
cye-1	Ccne1	CCNE1
cyh-1	Ccnh	CCNH
R02F2.1	Ccni	CCNI
ccnk-1	Ccnk	CCNK
cyl-1	Ccnl2	CCNL2
cit-1.1	Ccnt1	CCNT1
cit-1.2	Ccnt1	CCNT1
cyy-1	Ccny	CCNY
cct-2	Cct2	CCT2
cct-3	Cct3	CCT3
cct-4	Cct4	CCT4
cct-5	Cct5	CCT5
cct-6	Cct6a	CCT6A
cct-7	Cct7	CCT7
cct-8	Cct8	CCT8
ccz-1	Ccz1	CCZ1
tep-1	Cd109	CD109
clec-204	Cd209b	CD209
clec-205	Cd209b	CD209
cdap-2	Cd2ap	CD2AP
teg-1	Cd2bp2	CD2BP2
tsp-9	Cd81	CD81
tsp-8	Cd82	CD82
cdd-1	Cda	CDA
cdc-14	Cdc14a	CDC14A
emb-27	Cdc16	CDC16
mat-3	Cdc23	CDC23
cdc-25.4	Cdc25a	CDC25A
cdc-25.3	Cdc25c	CDC25C
cdc-25.1	Cdc25c	CDC25C
cdc-25.2	Cdc25c	CDC25C
mat-1	Cdc27	CDC27
cdc-37	Cdc37	CDC37
Y54G2A.12	Cdc40	CDC40
prp-17	Cdc40	CDC40
cdc-42	Cdc42	CDC42
mrck-1	Cdc42bpa	CDC42BPA
F09F7.5	Cdc42se1	CDC42SE1
F34D10.9	Cdc45	CDC45
evl-18	Cdc45	CDC45
cdc-5L	Cdc5l	CDC5L
cdc-6	Cdc6	CDC6
cdc-7	Cdc7	CDC7
cdc-73	Cdc73	CDC73
W02G9.4	Cdcp2	CDCP2
fig-1	Cdhr5	CDHR5
Y37D8A.6	Cdip1	CDIP1
Y22D7AL.15	Cdip1	CDIP1
Y40H7A.11	Cdip1	CDIP1
pisy-1	Cdipt	CDIPT
cdk-1	Cdk1	CDK1
cdk-11.2	Cdk11b	CDK11B
cdk-11.1	Cdk11b	CDK11B
C34E11.4	Cdk12	CDK12
cdk-12	Cdk12	CDK12
pct-1	Cdk18	CDK18
cdk-2	Cdk2	CDK2
Y43F4B.10	Cdk2ap2	CDK2AP2
cdk-5	Cdk5	CDK5
cdka-1	Cdk5r1	CDK5R1
F25B5.5	Cdk5rap1	CDK5RAP1
cdkr-3	Cdk5rap3	CDK5RAP3
cdk-4	Cdk6	CDK6
cdk-7	Cdk7	CDK7
cdk-8	Cdk8	CDK8
cdk-9	Cdk9	CDK9
F52B5.2	Cdk9	CDK9
Y92H12BL.1	Cdkal1	CDKAL1
cki-1	Cdkn1b	CDKN1B
cki-2	Cdkn1b	CDKN1B
paxt-1	Cdkn2aipnl	CDKN2AIPNL
cdo-1	Cdo1	CDO1
D2089.8	Cdpf1	CDPF1
cdgs-1	Cds1	CDS1
cdt-1	Cdt1	CDT1
F42A10.5	Cdv3	CDV3
pal-1	Cdx1	CDX1
cebp-1	Cebpb	CEBPB
zip-4	Cebpe	CEBPE
zip-2	Cebpg	CEBPG
F23B12.7	Cebpz	CEBPZ
etr-1	Celf1	CELF1
fmi-1	Celsr3	CELSR3
sid-2	Cend1	CEND1
cpar-1	Cenpa	CENPA
ZC155.2	Cenpa	CENPA
hcp-3	Cenpa	CENPA
Y53G8AM.8	Cenpb	CENPB
hcp-4	Cenpc1	CENPC
gei-6	Cenpe	CENPE
F25B4.8	Cenpv	CENPV
F35H10.5	Cenpx	CENPX
C06A8.8	Cep104	CEP104
spd-2	Cep192	CEP192
R148.3	Cep63	CEP63
R02F11.4	Cep97	CEP97
cept-2	Cept1	CEPT1
cept-1	Cept1	CEPT1
cerk-1	Cerk	CERK
lagr-1	Cers1	CERS1
hyl-1	Cers5	CERS5
hyl-2	Cers5	CERS5
ges-1	Ces2a	CES2
R08D7.5	Cetn2	CETN2
E02A10.3	Cetn2	CETN2
C54C6.6	Cfap20	CFAP20
F36H12.5	Cfap46	CFAP46
T13A10.1	Cfap46	CFAP46
Y76B12C.4	Cfap46	CFAP46
F39H11.1	Cfdp1	CFDP1
W05F2.7	Cfhr2	CFHR3
F53E2.2	Cfl2	CFL2
unc-15	Cgnl1	CGNL1
F35C8.5	Ch25h	CH25H
F22F7.7	Chac1	CHAC1
W03D8.5	Chaf1a	CHAF1A
chaf-1	Chaf1a	CHAF1A
chaf-2	Chaf1b	CHAF1B
C24D10.6	Chchd1	CHCHD1
har-1	Chchd10	CHCHD10
chch-3	Chchd3	CHCHD3
ZK616.2	Chchd4	CHCHD4
ZK616.3	Chchd4	CHCHD4
F42H10.2	Chchd4	CHCHD4
F11C1.1	Chchd4	CHCHD4
chd-1	Chd2	CHD2
chd-3	Chd4	CHD4
let-418	Chd5	CHD5
chd-7	Chd6	CHD6
chk-1	Chek1	CHEK1
chk-2	Chek2	CHEK2
tag-65	Cherp	CHERP
cht-4	Chia1	CHIA
tag-266	Chic1	CHIC1
chil-10	Chid1	CHID1
chil-22	Chil1	CHI3L1
chil-23	Chil3	CHIA
chil-13	Chil3	CHIA
T19H5.6	Chil3	CHIA
cht-3	Chil5	CHIA
chil-24	Chit1	CHIT1
ckb-2	Chka	CHKA
cka-2	Chka	CHKA
cka-1	Chka	CHKA
ckb-4	Chka	CHKA
ckb-1	Chka	CHKA
rep-1	Chm	CHM
vps-2	Chmp2a	CHMP2A
C01A2.4	Chmp2b	CHMP2B
vps-32.1	Chmp4b	CHMP4B
R12C12.5	Chmp4c	CHMP4C
vps-20	Chmp6	CHMP6
chin-1	Chn1	CHN1
clec-72	Chodl	CHODL
clec-82	Chodl	CHODL
clec-258	Chodl	CHODL
clec-170	Chodl	CHODL
chpf-1	Chp1	CHP1
pbo-1	Chp2	CHP2
mig-22	Chpf	CHPF
F42A9.8	Chrac1	CHRAC1
gar-2	Chrm2	CHRM2
lev-1	Chrna1	CHRNA1
lgc-26	Chrna6	CHRNA6
cup-4	Chrna6	CHRNA6
acr-18	Chrna7	CHRNA7
pbo-5	Chrna7	CHRNA7
acr-15	Chrna7	CHRNA7
lgc-31	Chrna9	CHRNA9
lgc-22	Chrnb1	CHRNB1
sqv-5	Chsy3	CHSY3
ctf-18	Chtf18	CHTF18
ctf-8	Chtf8	CHTF8
Y92H12BR.2	Chtop	CHTOP
oxy-4	Ciao3	CIAO3
T20B12.7	Ciapin1	CIAPIN1
calm-1	Cib2	CIB2
gei-3	Cic	CIC
T23E7.2	Cic	CIC
Y8A9A.2	Cilp	CILP
F11C7.2	Cilp	CILP
B0432.7	Cip2a	CIP2A
cir-1	Cir1	CIR1
rbm-3.1	Cirbp	CIRBP
cisd-1	Cisd1	CISD1
cisd-3.2	Cisd3	CISD3
cisd-3.1	Cisd3	CISD3
F59A6.5	Cit	CIT
W02B8.2	Cit	CIT
T26A8.1	Cited4	CITED4
F54A3.2	Ckap5	CKAP5
zyg-9	Ckap5	CKAP5
T08D2.8	Ckap5	CKAP5
W10C8.5	Ckb	CKB
argk-1	Ckb	CKB
ZC434.8	Ckb	CKB
F32B5.1	Ckb	CKB
F46H5.3	Ckb	CKB
C42D8.1	Cklf	CKLF
cks-1	Cks1b	CKS1B
Y71G12B.27	Cks2	CKS2
C27C12.1	Clasp2	CLASP2
cls-1	Clasp2	CLASP2
cls-2	Clasp2	CLASP2
cls-3	Clasp2	CLASP2
F28C1.1	Clasrp	CLASRP
ooc-3	Clcc1	CLCC1
clh-1	Clcn1	CLCN1
clh-3	Clcn2	CLCN2
clh-5	Clcn3	CLCN3
clh-6	Clcn7	CLCN7
gop-1	Clec16a	CLEC16A
clec-172	Clec1b	CLEC1B
clec-67	Clec1b	CLEC1B
clec-180	Clec2d	CLEC2D
clec-87	Clec4a1	CLEC4A
clec-146	Clec4a4	CLEC4A
F28B4.3	Clec4a4	CLEC4A
clec-91	Clec4e	CLEC4E
clec-88	Clec4e	CLEC4E
clec-1	Clec4f	CLEC4F
clec-149	Clec4f	CLEC4F
exc-4	Clic5	CLIC5
exl-1	Clic5	CLIC5
rsd-3	Clint1	CLINT1
clip-1	Clip2	CLIP2
Y111B2A.1	Clk2	CLK2
madd-3	Clk2	CLK2
C16A11.10	Clk4	CLK4
M116.5	Clmn	CLMN
cln-3.3	Cln3	CLN3
cln-3.1	Cln3	CLN3
ril-2	Cln3	CLN3
cln-3.2	Cln3	CLN3
icln-1	Clns1a	CLNS1A
icl-1	Clns1a	CLNS1A
clpp-1	Clpp	CLPP
R166.2	Clptm1	CLPTM1
T13H5.8	Clptm1l	CLPTM1L
D2030.2	Clpx	CLPX
K07A3.3	Clpx	CLPX
clsp-1	Clspn	CLSPN
casy-1	Clstn2	CLSTN2
clic-1	Clta	CLTA
chc-1	Cltc	CLTC
dyf-3	Cluap1	CLUAP1
clu-1	Cluh	CLUH
C01G10.7	Clybl	CLYBL
D1022.4	Cmbl	CMBL
D1022.3	Cmbl	CMBL
F01F1.2	Cmc1	CMC1
C35D10.17	Cmc2	CMC2
F40F8.1	Cmpk1	CMPK1
C29F7.3	Cmpk1	CMPK1
K09G1.1	Cmtm3	CMTM3
K04G2.9	Cmtm8	CMTM8
Y40D12A.1	Cmtr2	CMTR2
K08D12.3	Cnbp	CNBP
pes-9	Cndp2	CNDP2
Y71H2AM.11	Cndp2	CNDP2
nepr-1	Cnep1r1	CNEP1R1
cni-1	Cnih1	CNIH1
cnk-1	Cnksr2	CNKSR2
unc-87	Cnn1	CNN1
clik-2	Cnn3	CNN3
clik-3	Cnn3	CNN3
clik-1	Cnn3	CNN3
cnnm-2	Cnnm1	CNNM1
cnnm-4	Cnnm1	CNNM1
cnnm-1	Cnnm2	CNNM2
cnnm-3	Cnnm4	CNNM4
let-711	Cnot1	CNOT1
ntl-11	Cnot11	CNOT11
ntl-2	Cnot2	CNOT2
ntl-3	Cnot3	CNOT3
tag-153	Cnot3	CNOT3
ccr-4	Cnot6l	CNOT6L
ccf-1	Cnot7	CNOT7
ntl-9	Cnot9	CNOT9
F09G2.2	Cnppd1	CNPPD1
F01F1.15	Cnpy2	CNPY2
Y47H9C.8	Cnpy2	CNPY2
F01F1.11	Cnpy2	CNPY2
cosa-1	Cntd1	CNTD1
rig-1	Cntn3	CNTN3
rig-3	Cntn5	CNTN5
rig-6	Cntn6	CNTN6
itx-1	Cntnap2	CNTNAP2
ZK1098.6	Cntrob	CNTROB
coa-3	Coa3	COA3
coa-5	Coa5	COA5
coa-7	Coa7	COA7
Y65B4A.8	Coasy	COASY
cogc-1	Cog1	COG1
cogc-2	Cog2	COG2
cogc-3	Cog3	COG3
cogc-5	Cog5	COG5
cogc-6	Cog6	COG6
cogc-8	Cog8	COG8
cle-1	Col18a1	COL18A1
col-135	Col19a1	COL19A1
col-61	Col24a1	COL24A1
col-139	Col24a1	COL24A1
rol-6	Col24a1	COL24A1
col-58	Col24a1	COL24A1
col-130	Col24a1	COL24A1
col-146	Col24a1	COL24A1
col-142	Col24a1	COL24A1
dpy-5	Col24a1	COL24A1
col-98	Col24a1	COL24A1
col-39	Col24a1	COL24A1
col-111	Col24a1	COL24A1
col-62	Col24a1	COL24A1
col-147	Col24a1	COL24A1
lon-3	Col24a1	COL24A1
sqt-1	Col24a1	COL24A1
col-141	Col24a1	COL24A1
col-63	Col24a1	COL24A1
col-103	Col24a1	COL24A1
col-19	Col24a1	COL24A1
dpy-17	Col24a1	COL24A1
col-162	Col24a1	COL24A1
col-175	Col24a1	COL24A1
let-2	Col4a1	COL4A1
emb-9	Col4a5	COL4A5
Y51H7C.1	Col4a6	COL4A6
col-153	Col5a2	COL5A2
T17H7.1	Col5a2	COL5A2
col-150	Col5a2	COL5A2
col-149	Col5a2	COL5A2
col-89	Col5a3	COL5A3
F53A9.9	Col6a3	COL6A3
col-91	Col6a3	COL6A3
irg-7	Col6a3	COL6A3
col-118	Col6a3	COL6A3
col-161	Col6a3	COL6A3
mec-5	Col6a5	COL6A5
R193.2	Col6a5	COL6A5
T19D12.4	Col6a5	COL6A5
col-8	Col7a1	COL7A1
col-140	Col7a1	COL7A1
col-106	Col7a1	COL7A1
bli-1	Col9a1	COL9A1
clec-145	Colec10	COLEC10
col-60	Colec11	COLEC11
T28F2.2	Commd4	COMMD4
comt-3	Comtd1	COMTD1
comt-4	Comtd1	COMTD1
comt-5	Comtd1	COMTD1
par-2	Cop1	COP1
copa-1	Copa	COPA
copb-1	Copb1	COPB1
Y41C4A.32	Copb2	COPB2
copb-2	Copb2	COPB2
cope-1	Cope	COPE
csn-2	Cops2	COPS2
F59B2.15	Cops2	COPS2
csn-4	Cops4	COPS4
csn-5	Cops5	COPS5
csn-6	Cops6	COPS6
copz-1	Copz1	COPZ1
coq-3	Coq3	COQ3
prmt-6	Coq3	COQ3
coq-4	Coq4	COQ4
coq-5	Coq5	COQ5
coq-6	Coq6	COQ6
clk-1	Coq7	COQ7
egg-2	Corin	CORIN
cor-1	Coro1c	CORO1C
pod-1	Coro7	CORO7
cox-10	Cox10	COX10
cox-11	Cox11	COX11
cox-15	Cox15	COX15
cox-17	Cox17	COX17
cox-18	Cox18	COX18
cox-19	Cox19	COX19
cox-4	Cox4i1	COX4I1
cox-5A	Cox5a	COX5A
cox-5B	Cox5b	COX5B
cox-6A	Cox6a2	COX6A2
cox-6C	Cox6c	COX6C
Y111B2A.2	Cox6c	COX6C
cox-7C	Cox7c	COX7C
F21D5.3	Cp	CP
Y47G6A.19	Cpa2	CPA2
ZC434.9	Cpa2	CPA2
W01A8.6	Cpa2	CPA2
Y59C2A.1	Cpa4	CPA4
oxy-5	Cpa5	CPA5
T06A4.3	Cpa6	CPA6
F02D8.4	Cpb2	CPB2
cpd-2	Cpd	CPD
cpd-1	Cpd	CPD
egl-21	Cpe	CPE
cpb-3	Cpeb1	CPEB1
cpb-2	Cpeb2	CPEB2
fog-1	Cpeb2	CPEB2
cpb-1	Cpeb2	CPEB2
cpx-1	Cplx1	CPLX1
lron-11	Cpn2	CPN2
nra-1	Cpne5	CPNE5
gem-4	Cpne8	CPNE8
cpna-1	Cpne8	CPNE8
cpna-5	Cpne8	CPNE8
cpna-3	Cpne8	CPNE8
cpna-2	Cpne9	CPNE9
cpsf-1	Cpsf1	CPSF1
cpsf-2	Cpsf2	CPSF2
cpsf-3	Cpsf3	CPSF3
cpsf-4	Cpsf4	CPSF4
cfim-2	Cpsf7	CPSF7
cpt-4	Cpt1a	CPT1A
cpt-5	Cpt1a	CPT1A
cpt-6	Cpt1a	CPT1A
W03F9.4	Cpt1a	CPT1A
cpt-1	Cpt1a	CPT1A
cpt-2	Cpt2	CPT2
K08E4.2	Cptp	CPTP
tag-296	Cptp	CPTP
R151.8	Cramp1	CRAMP1
B0395.3	Crat	CRAT
crb-3	Crb3	CRB3
M18.6	Crbn	CRBN
R08B4.3	Crbn	CRBN
M106.7	Crcp	CRCP
crh-1	Creb1	CREB1
crh-2	Creb3l1	CREB3L1
cbp-2	Crebbp	CREBBP
crld-1	Creld2	CRELD2
crm-1	Crim1	CRIM1
valv-1	Crip1	CRIP1
exc-9	Crip1	CRIP1
C36B1.14	Cript	CRIPT
ced-2	Crk	CRK
crls-1	Crls1	CRLS1
che-10	Crocc	CROCC
lfi-1	Crocc	CROCC
T20B3.1	Crot	CROT
Y73F8A.26	Crtap	CRTAP
hsp-25	Cryab	CRYAB
sip-1	Cryab	CRYAB
hsp-43	Cryab	CRYAB
hsp-12.1	Cryab	CRYAB
ZK1128.7	Cryab	CRYAB
hsp-16.2	Cryab	CRYAB
hsp-12.2	Cryab	CRYAB
hsp-17	Cryab	CRYAB
Y71F9B.9	Cryl1	CRYL1
F39B2.3	Cryz	CRYZ
cts-1	Cs	CS
xpo-2	Cse1l	CSE1L
csk-1	Csk	CSK
clec-227	Csmd1	CSMD1
clec-56	Csmd2	CSMD2
clec-54	Csmd2	CSMD2
clec-41	Csmd3	CSMD3
clec-57	Csmd3	CSMD3
prde-1	Csnk1a1	CSNK1A1
E02H4.6	Csnk1a1	CSNK1A1
kin-19	Csnk1a1	CSNK1A1
K04C1.5	Csnk1a1	CSNK1A1
kin-20	Csnk1d	CSNK1D
bed-2	Csnk1e	CSNK1E
csnk-1	Csnk1g2	CSNK1G2
kin-3	Csnk2a1	CSNK2A1
kin-10	Csnk2b	CSNK2B
ttr-14	Cspp1	CSPP1
C41D11.3	Csrnp1	CSRNP1
ZK622.5	Csrp2	CSRP2
mlp-1	Csrp3	CSRP3
cpi-1	Cst10	CST5
cpi-2	Cst3	CST3
K08B4.7	Cst6	CST6
cpf-1	Cstf1	CSTF1
cpf-2	Cstf2	CSTF2
rbm-3.2	Cstf2	CSTF2
R06C1.4	Cstf2t	CSTF2T
suf-1	Cstf3	CSTF3
Y39G10AR.16	Ctcf	CTCF
cnep-1	Ctdnep1	CTDNEP1
fcp-1	Ctdp1	CTDP1
scpl-1	Ctdsp1	CTDSP1
scpl-3	Ctdspl2	CTDSPL2
cbl-1	Cth	CTH
cth-2	Cth	CTH
cth-1	Cth	CTH
hmp-1	Ctnna1	CTNNA1
ctn-1	Ctnnal1	CTNNAL1
hmp-2	Ctnnb1	CTNNB1
jac-1	Ctnnd2	CTNND2
ctns-1	Ctns	CTNS
ctps-1	Ctps2	CTPS2
ctr-9	Ctr9	CTR9
ctsa-1.2	Ctsa	CTSA
ctsa-3.1	Ctsa	CTSA
Y16B4A.2	Ctsa	CTSA
ctsa-2	Ctsa	CTSA
ctsa-4.2	Ctsa	CTSA
ctsa-4.1	Ctsa	CTSA
ctsa-1.1	Ctsa	CTSA
cpr-3	Ctsb	CTSB
cpr-4	Ctsb	CTSB
cpr-5	Ctsb	CTSB
cpr-8	Ctsb	CTSB
cpr-1	Ctsb	CTSB
cpr-6	Ctsb	CTSB
Y65B4A.2	Ctsb	CTSB
F32H5.1	Ctsb	CTSB
asp-4	Ctsd	CTSD
asp-1	Ctse	CTSE
R07E3.1	Ctsf	CTSF
tag-196	Ctsf	CTSF
cpl-1	Ctsl	CTSV
Y40H7A.10	Ctss	CTSS
R09F10.1	Ctsw	CTSW
cpz-1	Ctsz	CTSZ
cpz-2	Ctsz	CTSZ
C49H3.6	Cttnbp2nl	CTTNBP2NL
Y71H2B.5	Ctu1	CTU1
tut-1	Ctu1	CTU1
Y71H2B.11	Ctu1	CTU1
tut-2	Ctu2	CTU2
F43C1.5	Cuedc1	CUEDC1
cul-1	Cul1	CUL1
cul-2	Cul2	CUL2
cul-3	Cul3	CUL3
cul-4	Cul4a	CUL4A
cul-5	Cul5	CUL5
F35G12.7	Cuta	CUTA
cutc-1	Cutc	CUTC
F41G3.6	Cux1	CUX1
ceh-44	Cux1	CUX1
cwc-15	Cwc15	CWC15
let-858	Cwc22	CWC22
mog-3	Cwc25	CWC25
cyn-16	Cwc27	CWC27
cfp-1	Cxxc1	CXXC1
F55H2.5	Cyb561	CYB561
F39G3.5	Cyb561a3	CYB561A3
cytb-5.1	Cyb5a	CYB5A
cytb-5.2	Cyb5a	CYB5A
D2023.1	Cyb5a	CYB5A
tag-131	Cyb5d2	CYB5D2
Y52B11A.3	Cyb5r4	CYB5R4
cyc-1	Cyc1	CYC1
cyc-2.2	Cycs	CYCS
cyc-2.1	Cycs	CYCS
gex-2	Cyfip1	CYFIP1
glb-20	Cygb	CYGB
cyld-1	Cyld	CYLD
asp-5	Cym	PGA4
asp-12	Cym	PGA4
asp-2	Cym	PGA4
asp-13	Cym	PGA4
hrg-7	Cym	PGA4
cyp-36A1	Cyp2a5	CYP2A6
cyp-33C9	Cyp2a5	CYP2A6
cyp-33C8	Cyp2b19	CYP2B6
cyp-33C7	Cyp2b19	CYP2B6
cyp-35D1	Cyp2c69	CYP2C18
cyp-14A5	Cyp2c70	CYP2C9
cyp-14A2	Cyp2c70	CYP2C9
cyp-34A8	Cyp2g1	CYP2C8
cyp-33A1	Cyp2g1	CYP2C8
cyp-35A2	Cyp2g1	CYP2C8
cyp-33E3	Cyp2g1	CYP2C8
cyp-35C1	Cyp2g1	CYP2C8
cyp-34A9	Cyp2j11	CYP2J2
cyp-33E1	Cyp2j5	CYP2J2
cyp-33E2	Cyp2j6	CYP2J2
cyp-33C2	Cyp2j6	CYP2J2
cyp-13A4	Cyp3a11	CYP3A5
cyp-25A3	Cyp3a11	CYP3A5
cyp-13A7	Cyp3a11	CYP3A5
cyp-13A6	Cyp3a11	CYP3A5
cyp-25A1	Cyp3a11	CYP3A5
cyp-13A5	Cyp3a11	CYP3A5
cyp-43A1	Cyp3a16	CYP3A5
cyp-13B2	Cyp3a25	CYP3A43
cyp-31A2	Cyp4v3	CYP4V2
cyp-31A5	Cyp4v3	CYP4V2
cyp-42A1	Cyp4v3	CYP4V2
cyp-37B1	Cyp4v3	CYP4V2
cyp-32A1	Cyp4v3	CYP4V2
cyp-37A1	Cyp4v3	CYP4V2
cyp-31A3	Cyp4v3	CYP4V2
cyp-29A2	Cyp4v3	CYP4V2
F46B6.12	Czib	CZIB
C33A12.3	D3Ertd751e	C4orf33
C55A6.10	D6Wsu163e	C12orf4
dab-1	Dab1	DAB1
gap-2	Dab2ip	DAB2IP
dad-1	Dad1	DAD1
dgn-1	Dag1	DAG1
T28F4.5	Dap	DAP
dap-3	Dap3	DAP3
dapk-1	Dapk1	DAPK1
zyg-1	Dapk2	DAPK2
dars-1	Dars	DARS1
dars-2	Dars2	DARS2
tbh-1	Dbh	DBH
acbp-1	Dbi	DBI
acbp-6	Dbil5	DBI
dbn-1	Dbnl	DBNL
dbr-1	Dbr1	DBR1
dbt-1	Dbt	DBT
dcaf-1	Dcaf1	DCAF1
ZK430.7	Dcaf13	DCAF13
F47D12.9	Dcaf4	DCAF4
R11D1.1	Dcaf5	DCAF5
swan-2	Dcaf7	DCAF7
swan-1	Dcaf7	DCAF7
T05G5.5	Dcakd	DCAKD
unc-40	Dcc	DCC
C27B7.7	Dcc	DCC
cdh-1	Dchs1	DCHS1
zyg-8	Dclk1	DCLK1
mrt-1	Dclre1b	DCLRE1B
pot-2	Dclre1b	DCLRE1B
dcap-1	Dcp1a	DCP1A
dcap-2	Dcp2	DCP2
dcs-1	Dcps	DCPS
tyr-6	Dct	DCT
ZK643.2	Dctd	DCTD
dnc-1	Dctn1	DCTN1
dnc-2	Dctn2	DCTN2
dnc-4	Dctn4	DCTN4
dnc-5	Dctn5	DCTN5
dnc-6	Dctn6	DCTN6
dcn-1	Dcun1d2	DCUN1D2
dhs-21	Dcxr	DCXR
F48C1.5	Dda1	DDA1
ZK1307.1	Ddah1	DDAH1
ddb-1	Ddb1	DDB1
bas-1	Ddc	DDC
basl-1	Ddc	DDC
tdc-1	Ddc	DDC
hdl-1	Ddc	DDC
ddi-1	Ddi1	DDI1
ddo-2	Ddo	DDO
ddo-3	Ddo	DDO
daao-1	Ddo	DDO
ddo-1	Ddo	DDO
ostb-1	Ddost	DDOST
ufbp-1	Ddrgk1	DDRGK1
F36H12.3	Ddrgk1	DDRGK1
tofu-2	Ddx1	DDX1
Y55F3BR.1	Ddx1	DDX1
chl-1	Ddx11	DDX11
ddx-17	Ddx17	DDX17
B0511.6	Ddx18	DDX18
ddx-19	Ddx19a	DDX19A
mel-46	Ddx20	DDX20
ddx-23	Ddx23	DDX23
rde-12	Ddx23	DDX23
F55F8.2	Ddx24	DDX24
ddx-27	Ddx27	DDX27
hel-1	Ddx39a	DDX39A
mut-14	Ddx3x	DDX3X
smut-1	Ddx3x	DDX3X
pgl-1	Ddx3x	DDX3X
laf-1	Ddx3x	DDX3X
vbh-1	Ddx3x	DDX3X
glh-3	Ddx3x	DDX3X
glh-4	Ddx3y	DDX3Y
glh-2	Ddx4	DDX4
glh-1	Ddx4	DDX4
sacy-1	Ddx41	DDX41
C46F11.4	Ddx42	DDX42
Y54G11A.3	Ddx43	DDX43
T26G10.1	Ddx47	DDX47
H20J04.4	Ddx49	DDX49
ZK686.2	Ddx51	DDX51
ddx-52	Ddx52	DDX52
Y94H6A.5	Ddx54	DDX54
ZK512.2	Ddx55	DDX55
C24H12.4	Ddx56	DDX56
drh-1	Ddx58	DDX58
cgh-1	Ddx6	DDX6
C28H8.3	Ddx60	DDX60
F53C11.3	Decr1	DECR1
decr-1.3	Decr1	DECR1
decr-1.2	Decr1	DECR1
F20H11.1	Def8	DEF8
F33D4.4	Degs2	DEGS2
ttm-5	Degs2	DEGS2
rme-4	Dennd1b	DENND1B
denn-4	Dennd4a	DENND4A
lst-6	Dennd5a	DENND5A
F53H1.3	Dennd6b	DENND6B
Y47D3A.21	Denr	DENR
let-99	Depdc1a	DEPDC1
toe-2	Depdc1a	DEPDC1
T08A11.1	Depdc5	DEPDC5
F09E5.3	Dera	DERA
cup-2	Derl1	DERL1
F36D4.5	Desi2	DESI2
pash-1	Dgcr8	DGCR8
dgk-2	Dgke	DGKE
dgk-4	Dgkh	DGKH
B0393.4	Dgkk	DGKK
dgk-1	Dgkq	DGKQ
dgk-5	Dgkz	DGKZ
Y7A5A.1	Dhcr24	DHCR24
T01G1.4	Dhdds	DHDDS
dhfr-1	Dhfr	DHFR
dhps-1	Dhps	DHPS
dhs-9	Dhrs1	DHRS1
dhs-26	Dhrs1	DHRS1
dhs-13	Dhrs4	DHRS4
dhrs-4	Dhrs4	DHRS4
R119.3	Dhrs4	DHRS4
dhs-30	Dhrs7b	DHRS7B
ogdh-2	Dhtkd1	DHTKD1
ddx-15	Dhx15	DHX15
mog-4	Dhx16	DHX16
let-355	Dhx33	DHX33
smgl-2	Dhx34	DHX34
ddx-35	Dhx35	DHX35
rha-2	Dhx37	DHX37
mog-1	Dhx38	DHX38
drh-3	Dhx58	DHX58
mog-5	Dhx8	DHX8
W06F12.2	Dhx8	DHX8
sop-3	Dhx8	DHX8
nlp-33	Dhx9	DHX9
rha-1	Dhx9	DHX9
grsp-1	Dhx9	DHX9
inft-2	Diaph1	DIAPH1
cyk-1	Diaph2	DIAPH2
dcr-1	Dicer1	DICER1
E02H1.1	Dimt1	DIMT1
dip-2	Dip2b	DIP2B
C53D5.1	Dipk1c	DIPK1C
Y71F9AR.4	Diras1	DIRAS1
D1081.12	Diras1	DIRAS1
drn-1	Diras2	DIRAS2
dis-3	Dis3	DIS3
disl-2	Dis3l2	DIS3L2
K01G5.5	Dkc1	DKC1
dlat-1	Dlat	DLAT
gei-1	Dlc1	DLC1
dld-1	Dld	DLD
dlg-1	Dlg2	DLG2
mics-1	Dlg2	DLG2
magu-4	Dlg5	DLG5
C50F7.3	Dlg5	DLG5
smz-1	Dlg5	DLG5
mpz-6	Dlg5	DLG5
C46H11.6	Dlg5	DLG5
mpz-3	Dlg5	DLG5
smz-2	Dlg5	DLG5
F40F9.3	Dlg5	DLG5
F28E10.4	Dlg5	DLG5
W03A5.6	Dlgap3	DLGAP3
Y51F10.3	Dll4	DLL4
dlst-1	Dlst	DLST
Y53G8AR.8	Dmac2	DMAC2
R02D5.8	Dmac2l	DMAC2L
C05C8.1	Dmac2l	DMAC2L
ekl-4	Dmap1	DMAP1
R10H10.3	Dmbt1	DMBT1
dys-1	Dmd	DMD
Y37E3.17	Dmgdh	DMGDH
ssq-4	Dmkn	DMKN
Y75B8A.13	Dmp1	DMP1
dmd-7	Dmrt1	DMRT1
dmd-9	Dmrt1	DMRT1
dmd-6	Dmrt1	DMRT1
rbc-1	Dmxl2	DMXL2
dna-2	Dna2	DNA2
dhc-4	Dnah12	DNAH12
dnj-19	Dnaja2	DNAJA2
dnj-10	Dnaja3	DNAJA3
dnj-12	Dnaja4	DNAJA4
dnj-20	Dnajb11	DNAJB11
dnj-1	Dnajb12	DNAJB12
dnj-26	Dnajb14	DNAJB14
dnj-13	Dnajb5	DNAJB5
dnj-24	Dnajb6	DNAJB6
dnj-16	Dnajb6	DNAJB6
F54F2.9	Dnajc1	DNAJC1
dnj-27	Dnajc10	DNAJC10
dnj-9	Dnajc11	DNAJC11
rme-8	Dnajc13	DNAJC13
dnj-5	Dnajc14	DNAJC14
dnj-8	Dnajc16	DNAJC16
dnj-22	Dnajc17	DNAJC17
dnj-21	Dnajc19	DNAJC19
dnj-11	Dnajc2	DNAJC2
dnj-17	Dnajc21	DNAJC21
ZK858.5	Dnajc22	DNAJC22
dnj-2	Dnajc25	DNAJC25
dnj-28	Dnajc3	DNAJC3
dnj-7	Dnajc3	DNAJC3
dnj-18	Dnajc30	DNAJC30
dnj-4	Dnajc4	DNAJC4
dnj-3	Dnajc4	DNAJC4
dnj-14	Dnajc5b	DNAJC5B
dnj-25	Dnajc6	DNAJC6
dnj-30	Dnajc8	DNAJC8
dnj-23	Dnajc9	DNAJC9
dyla-1	Dnali1	DNALI1
crn-6	Dnase2a	DNASE2
crn-7	Dnase2a	DNASE2
nuc-1	Dnase2b	DNASE2B
R08E3.1	Dner	DNER
Y38C1AA.9	Dner	DNER
F55H12.3	Dner	DNER
F53A3.7	Dnlz	DNLZ
dyn-1	Dnm1	DNM1
drp-1	Dnm1l	DNM1L
Y37A1B.17	Dnmbp	DNMBP
dnpp-1	Dnpep	DNPEP
saeg-2	Dnttip1	DNTTIP1
Y49F6B.2	Dnttip2	DNTTIP2
ced-5	Dock1	DOCK1
F46H5.4	Dock7	DOCK7
F22G12.5	Dock9	DOCK9
dohh-1	Dohh	DOHH
F14D12.1	Dok7	DOK7
dolk-1	Dolk	DOLK
dnsn-1	Donson	DONSON
pad-1	Dop1b	DOP1B
dot-1.1	Dot1l	DOT1L
Y60A3A.8	Dpagt1	DPAGT1
algn-7	Dpagt1	DPAGT1
dpff-1	Dpf3	DPF3
dph-1	Dph1	DPH1
dph-2	Dph2	DPH2
dph-3	Dph3	DPH3
dpm-1	Dpm1	DPM1
dpm-3	Dpm3	DPM3
dpt-1	Dpp3	DPP3
dpf-3	Dpp9	DPP9
dpy-19	Dpy19l1	DPY19L1
dpy-30	Dpy30	DPY30
W07E11.1	Dpyd	DPYD
dpyd-1	Dpyd	DPYD
unc-33	Dpys	DPYS
dhp-1	Dpys	DPYS
dhp-2	Dpys	DPYS
C33A11.2	Dram1	DRAM1
drap-1	Drap1	DRAP1
T28D6.6	Drg1	DRG1
C02F5.3	Drg2	DRG2
drsh-1	Drosha	DROSHA
dscc-1	Dscc1	DSCC1
vab-10	Dst	DST
pqn-68	Dtd1	DTD1
cdt-2	Dtl	DTL
dyb-1	Dtnb	DTNB
dsbn-1	Dtnbp1	DTNBP1
Y53C12A.10	Dtwd1	DTWD1
dtmk-1	Dtymk	DTYMK
bli-3	Duox1	DUOX1
doxa-1	Duoxa1	DUOXA1
F36A2.2	Dus1l	DUS1L
dus-2	Dus2	DUS2
Y37E11B.5	Dus3l	DUS3L
C45G9.2	Dus4l	DUS4L
F54C8.4	Dusp11	DUSP11
pir-1	Dusp11	DUSP11
C24F3.2	Dusp12	DUSP12
F13D11.3	Dusp14	DUSP14
C04F12.8	Dusp14	DUSP14
vhp-1	Dusp16	DUSP16
Y54F10BM.13	Dusp19	DUSP19
C16A3.2	Dusp22	DUSP22
F26A3.4	Dusp28	DUSP28
lip-1	Dusp9	DUSP9
dut-1	Dut	DUT
duxl-1	Duxbl1	DUXB
ceh-83	Duxbl1	DUXB
ceh-82	Duxbl1	DUXB
dsh-2	Dvl2	DVL2
dsh-1	Dvl2	DVL2
mig-5	Dvl3	DVL3
F07H5.10	Dxo	DXO
Y47H10A.4	Dxo	DXO
M01G12.9	Dxo	DXO
dom-3	Dxo	DXO
C47D12.2	Dym	DYM
dhc-1	Dync1h1	DYNC1H1
dyci-1	Dync1i2	DYNC1I2
dli-1	Dync1li1	DYNC1LI1
dlc-2	Dynll2	DYNLL2
dlc-1	Dynll2	DYNLL2
dyrb-1	Dynlrb2	DYNLRB2
dylt-3	Dynlt1b	DYNLT1
dylt-1	Dynlt3	DYNLT3
mbk-1	Dyrk1b	DYRK1B
mbk-2	Dyrk2	DYRK2
fer-1	Dysf	DYSF
Y56A3A.31	E130309D02Rik	C7orf26
efl-1	E2f4	E2F4
pqn-82	E330034G19Rik	DLG5
eaf-1	Eaf2	EAF2
F48E8.2	Eapp	EAPP
ears-2	Ears2	EARS2
ZK154.4	Ebag9	EBAG9
C18A3.3	Ebna1bp2	EBNA1BP2
ZK84.2	Ebpl	EBPL
F19C6.2	Ecd	ECD
nep-1	Ece1	ECE1
nep-26	Ece1	ECE1
nep-22	Ece1	ECE1
nep-17	Ece1	ECE1
nep-6	Ece1	ECE1
nep-10	Ece1	ECE1
nep-11	Ece2	ECE2
nep-4	Ecel1	ECEL1
F58A6.1	Ech1	ECH1
Y25C1A.13	Ech1	ECH1
C32E8.9	Echdc1	ECHDC1
ech-3	Echs1	ECHS1
ech-7	Echs1	ECHS1
ech-4	Eci2	ECI2
B0272.4	Eci2	ECI2
Y17G9B.5	Ecsit	ECSIT
ect-2	Ect2	ECT2
edc-3	Edc3	EDC3
edc-4	Edc4	EDC4
actl-1	Eddm3b	EDDM3B
C47E12.3	Edem1	EDEM1
F10C2.5	Edem2	EDEM2
ZC506.1	Edem3	EDEM3
mbf-1	Edf1	EDF1
eea-1	Eea1	EEA1
eef-1A.1	Eef1a1	EEF1A1
eef-1A.2	Eef1a1	EEF1A1
M142.8	Eef1akmt1	EEF1AKMT1
F29B9.1	Eef1akmt2	EEF1AKMT2
Y34B4A.7	Eef1aknmt	METTL13
C01B10.8	Eef1aknmt	METTL13
eef-1B.1	Eef1b2	EEF1B2
eef-1B.2	Eef1d	EEF1D
eef-1G	Eef1g	EEF1G
eef-2	Eef2	EEF2
efk-1	Eef2k	EEF2K
R08D7.4	Eef2kmt	EEF2KMT
efsc-1	Eefsec	EEFSEC
efhd-1	Efhd2	EFHD2
K10C3.5	Efl1	EFL1
efn-4	Efna1	EFNA1
efn-3	Efnb2	EFNB2
efn-2	Efnb3	EFNB3
efr-3	Efr3a	EFR3A
C32D5.4	Efr3b	EFR3B
eftu-2	Eftud2	EFTUD2
rme-2	Egf	EGF
T19D12.6	Egflam	EGFLAM
let-23	Egfr	EGFR
egl-9	Egln3	EGLN3
egrh-1	Egr1	EGR1
egrh-3	Egr1	EGR1
egrh-2	Egr2	EGR2
ehbp-1	Ehbp1	EHBP1
rme-1	Ehd1	EHD1
ech-9	Ehhadh	EHHADH
ech-8	Ehhadh	EHHADH
epg-4	Ei24	EI24
H21P03.2	Eid3	EID3
eif-1	Eif1	EIF1
ZK856.11	Eif1ad	EIF1AD
eif-1.A	Eif1ax	EIF1AX
eif-2A	Eif2a	EIF2A
pek-1	Eif2ak3	EIF2AK3
gcn-2	Eif2ak4	EIF2AK4
eif-2Balpha	Eif2b1	EIF2B1
eif-2Bbeta	Eif2b2	EIF2B2
eif-2Bgamma	Eif2b3	EIF2B3
eif-2Bdelta	Eif2b4	EIF2B4
eif-2Bepsilon	Eif2b5	EIF2B5
eif-2D	Eif2d	EIF2D
eif-2alpha	Eif2s1	EIF2S1
eif-2beta	Eif2s2	EIF2S2
eif-2gamma	Eif2s3x	EIF2S3
egl-45	Eif3a	EIF3A
eif-3.B	Eif3b	EIF3B
eif-3.C	Eif3c	EIF3C
eif-3.D	Eif3d	EIF3D
eif-3.E	Eif3e	EIF3E
eif-3.F	Eif3f	EIF3F
eif-3.G	Eif3g	EIF3G
eif-3.H	Eif3h	EIF3H
eif-3.I	Eif3i	EIF3I
eif-3.J	Eif3j1	EIF3J
eif-3.K	Eif3k	EIF3K
eif-3.L	Eif3l	EIF3L
C03H5.5	Eif3l	EIF3L
cif-1	Eif3m	EIF3M
F33D11.10	Eif4a3	EIF4A3
Y65B4A.6	Eif4a3	EIF4A3
K09H11.4	Eif4b	EIF4B
H05C05.1	Eif4b	EIF4B
ife-2	Eif4e	EIF4E
ife-5	Eif4e	EIF4E
ife-3	Eif4e	EIF4E
ife-4	Eif4e2	EIF4E2
ifet-1	Eif4enif1	EIF4ENIF1
ifg-1	Eif4g1	EIF4G1
drr-2	Eif4h	EIF4H
iff-1	Eif5a	EIF5A
iff-2	Eif5a	EIF5A
iffb-1	Eif5b	EIF5B
eif-6	Eif6	EIF6
eipr-1	Eipr1	EIPR1
hoe-1	Elac2	ELAC2
exc-7	Elavl4	ELAVL4
svh-5	Elf5	ELF5
lin-1	Elk3	ELK3
ets-9	Elk3	ELK3
ell-1	Ell	ELL
ced-12	Elmo1	ELMO1
C56G7.3	Elmod3	ELMOD3
tceb-3	Eloa	ELOA
elb-1	Elob	ELOB
elc-1	Eloc	ELOC
elo-5	Elovl3	ELOVL3
elo-2	Elovl3	ELOVL3
elo-8	Elovl3	ELOVL3
elo-6	Elovl3	ELOVL3
elo-9	Elovl3	ELOVL3
elo-1	Elovl3	ELOVL3
elo-4	Elovl3	ELOVL3
elo-3	Elovl6	ELOVL6
elpc-1	Elp1	ELP1
elpc-2	Elp2	ELP2
elpc-3	Elp3	ELP3
elpc-4	Elp4	ELP4
W09B6.4	Elp5	ELP5
emc-1	Emc1	EMC1
Y43F8C.7	Emc10	EMC10
emc-2	Emc2	EMC2
emc-3	Emc3	EMC3
perm-3	Emc4	EMC4
emc-6	Emc6	EMC6
C35D10.1	Emc7	EMC7
F25H2.4	Emc9	EMC9
elp-1	Eml2	EML2
ceh-41	En2	EN2
cps-6	Endog	ENDOG
endu-1	Endou	ENDOU
endu-2	Endou	ENDOU
eng-1	Engase	ENGASE
enol-1	Eno1	ENO1
F58H1.8	Enoph1	ENOPH1
F58H1.3	Enoph1	ENOPH1
C27A7.1	Enpp1	ENPP1
C01B10.9	Enpp4	ENPP4
T03G6.3	Enpp6	ENPP6
uda-1	Entpd5	ENTPD5
mig-23	Entpd7	ENTPD7
ntp-1	Entpd7	ENTPD7
T01C3.2	Eny2	ENY2
H12D21.10	Eogt	EOGT
tbx-34	Eomes	EOMES
cbp-1	Ep300	EP300
ZK1010.10	Ep300	EP300
cbp-3	Ep300	EP300
ssl-1	Ep400	EP400
frm-1	Epb41l2	EPB41L2
frm-2	Epb41l4b	EPB41L4B
epc-1	Epc2	EPC2
epg-5	Epg5	EPG5
vab-1	Epha4	EPHA4
F26E4.5	Epha7	EPHA7
C32H11.4	Ephx1	EPHX1
C29F3.7	Ephx1	EPHX1
dod-17	Ephx1	EPHX1
F55G11.4	Ephx1	EPHX1
ZK1037.6	Ephx1	EPHX1
K10D11.5	Ephx1	EPHX1
K08D8.5	Ephx1	EPHX1
W01A11.1	Ephx1	EPHX1
dod-24	Ephx1	EPHX1
dod-22	Ephx1	EPHX1
ZK896.5	Ephx1	EPHX1
K08D8.3	Ephx1	EPHX1
F17C11.11	Ephx1	EPHX1
[truncated: 5,323 more rows]

## Sheet: Zebrafish
Zebrafish gene	Mouse gene	Human gene
si:ch211-162e15.3	0610012G03Rik	NCBP2AS2
C5H11orf1	1110032A03Rik	C11orf1
zgc:112185	1110038F14Rik	C8orf33
zgc:77056	1110059G10Rik	KIAA1143
si:ch211-248e11.2	1700007K13Rik	C9orf116
si:ch211-226m7.4	1700012P22Rik	C1orf158
si:ch211-163l21.7	1700013F07Rik	C1orf194
si:ch211-274p24.2	1700016K19Rik	C17orf97
si:dkey-73n10.1	1700017B05Rik	C15orf39
zgc:55943	1700025G04Rik	C1orf21
zgc:92140	1700025G04Rik	C1orf21
si:ch73-103b9.2	1700030J22Rik	C16orf46
si:ch1073-104i17.1	1700030K09Rik	C19orf44
C7H20orf27	1700037H04Rik	C20orf27
si:ch211-151p13.8	1700037H04Rik	C20orf27
si:ch211-214c7.5	1700067K01Rik	C19orf67
si:dkey-43k4.3	1700088E04Rik	C22orf23
si:dkey-57n24.6	1810020O05Rik	CFAP92
si:ch211-91p5.3	1810030O07Rik	CXorf38
zgc:153935	1810030O07Rik	CXorf38
zgc:158412	1810046K07Rik	C11orf53
si:ch211-213d14.1	1810046K07Rik	C11orf53
si:ch73-359m17.9	1810055G02Rik	C11orf24
STMP1	1810058I24Rik	STMP1
si:dkey-102g19.3	1810065E05Rik	PINLYP
zgc:158432	2010106E10Rik	MEP1B
si:ch73-343g19.4	2200002J24Rik	IFITM5
si:dkey-33i11.9	2200002J24Rik	IFITM5
si:rp71-77l1.2	2200002J24Rik	IFITM5
si:rp71-77l1.1	2200002J24Rik	IFITM5
prss1	2210010C04Rik	PRSS1
zgc:162025	2210016L21Rik	C12orf43
si:ch73-280o22.2	2210408I21Rik	KIAA0825
si:ch73-238c9.1	2310011J03Rik	C19orf25
zgc:193711	2310030G06Rik	C11orf52
si:rp71-19m20.1	2310057M21Rik	C10orf88
si:ch211-215a10.4	2310061I04Rik	C6orf136
si:dkey-18j18.3	2410004P03Rik	C2orf50
si:ch211-51h9.6	2510002D24Rik	C22orf39
si:dkeyp-104h9.5	2510039O18Rik	KIAA2013
zgc:112416	2610028H24Rik	C21orf58
si:ch211-259g3.4	2610507B11Rik	KIAA0100
si:ch73-185c24.2	2610528J11Rik	C1orf210
si:ch211-185a18.2	2700049A03Rik	KIAA0586
si:dkey-184p18.2	2700062C07Rik	C18orf21
zgc:109986	2700097O09Rik
zgc:194224	2810004N23Rik	C1orf131
si:ch73-138n13.1	2900026A02Rik	KIAA1671
zgc:193812	3110040N11Rik	C15orf40
zgc:153352	4833420G17Rik	C5orf34
si:dkeyp-44a8.2	4833439L19Rik	KIAA1191
zgc:123105	4833439L19Rik	KIAA1191
si:dkey-188g12.1	4921504E06Rik	C10orf67
C9H3orf38	4930453N24Rik	C3orf38
zgc:152948	4930503L19Rik	C18orf54
zgc:113886	4930522L14Rik	ZNF585B
org	4930563M21Rik
si:dkey-100n19.2	4930578I06Rik	C8orf74
si:ch211-233a24.2	4932438A13Rik	KIAA1109
scpp1	4933409G03Rik	POTEE
si:dkey-243i1.1	4933427D14Rik	KIAA0753
zgc:172139	5031439G07Rik	KIAA0930
si:ch211-276c2.4	5430403G16Rik	ZNF433
si:ch73-299h12.2	5730507C01Rik	ZNF799
si:dkey-1b17.2	5730507C01Rik	ZNF799
zgc:91860	6430548M08Rik	KIAA0513
si:dkey-76p14.2	6820408C15Rik	C20orf96
zgc:101716	9130401M01Rik	C8orf76
soga3a	9330159F19Rik	KIAA0408
si:ch211-151o1.4	9330159F19Rik	KIAA0408
si:ch211-157b11.12	9430015G10Rik	C1orf159
si:ch73-269m14.2	9530068E07Rik	C5orf15
si:dkey-222b8.4	9530077C05Rik	KIAA0895
c19h1orf109	9930104L06Rik	C1orf109
zmp:0000000951	9930111J21Rik1	IRGC
irgq1	9930111J21Rik1	IRGC
asip1	a	ASIP
zgc:112163	A130010J15Rik	C1orf74
a1cf	A1cf	A1CF
zgc:165453	A2m	A2M
si:ch211-212c13.10	A2m	A2M
si:dkey-105h12.2	A2m	A2M
si:dkey-52d15.2	A2m	A2M
sb:cb37	A2m	A2M
zgc:171426	A2m	A2M
a2ml	A2m	A2M
si:ch211-147a11.3	A430005L14Rik	C1orf174
si:dkey-16i5.8	A930007A09Rik	TMEM238
si:dkeyp-72e1.6	A930007A09Rik	TMEM238
si:ch211-248l17.3	A930017K11Rik	PRR35
zgc:158258	AA986860	C1orf116
aaas	Aaas	AAAS
aacs	Aacs	AACS
aadac	Aadac	AADAC
aadacl4	Aadacl4fm2
aadat	Aadat	AADAT
aagab	Aagab	AAGAB
aak1b	Aak1	AAK1
aak1a	Aak1	AAK1
aamdc	Aamdc	AAMDC
aamp	Aamp	AAMP
aanat1	Aanat	AANAT
aanat2	Aanat	AANAT
aar2	Aar2	AAR2
si:ch211-153f2.3	Aard	AARD
aars2	Aars2	AARS2
aarsd1	Aarsd1	AARSD1
aasdh	Aasdh	AASDH
aasdhppt	Aasdhppt	AASDHPPT
aass	Aass	AASS
aatf	Aatf	AATF
aatkb	Aatk	AATK
aatka	Aatk	AATK
abat	Abat	ABAT
abca1b	Abca1	ABCA1
abca1a	Abca1	ABCA1
abca12	Abca12	ABCA12
abch1	Abca15	ABCA3
abca2	Abca2	ABCA2
abca3b	Abca3	ABCA3
ABCA7	Abca4	ABCA4
abca4a	Abca4	ABCA4
abca4b	Abca4	ABCA4
abca5	Abca5	ABCA5
abcb10	Abcb10	ABCB10
abcb11b	Abcb11	ABCB11
abcb11a	Abcb11	ABCB11
abcb5	Abcb1a	ABCB1
abcb4	Abcb4	ABCB4
abcb6a	Abcb6	ABCB6
abcb6b	Abcb6	ABCB6
abcb7	Abcb7	ABCB7
abcb8	Abcb8	ABCB8
abcb9	Abcb9	ABCB9
abcc1	Abcc1	ABCC1
abcc10	Abcc10	ABCC10
abcc12	Abcc12	ABCC12
abcc2	Abcc2	ABCC2
abcc3	Abcc3	ABCC3
abcc4	Abcc4	ABCC4
abcc5	Abcc5	ABCC5
abcc6b.1	Abcc6	ABCC6
abcc6b.2	Abcc6	ABCC6
abcc13	Abcc6	ABCC6
abcc6a	Abcc6	ABCC6
abcc8	Abcc8	ABCC8
abcc8b	Abcc8	ABCC8
abcc9	Abcc9	ABCC9
abcd1	Abcd1	ABCD1
ABCD2	Abcd2	ABCD2
abcd2	Abcd2	ABCD2
abcd3b	Abcd3	ABCD3
abcd3a	Abcd3	ABCD3
abcd4	Abcd4	ABCD4
abce1	Abce1	ABCE1
abcf1	Abcf1	ABCF1
abcf2b	Abcf2	ABCF2
abcf2a	Abcf2	ABCF2
abcf3	Abcf3	ABCF3
abcg1	Abcg1	ABCG1
abcg2b	Abcg2	ABCG2
abcg2a	Abcg2	ABCG2
abcg2d	Abcg2	ABCG2
abcg2c	Abcg2	ABCG2
abcg4a	Abcg4	ABCG4
abcg4b	Abcg4	ABCG4
abcg5	Abcg5	ABCG5
abcg8	Abcg8	ABCG8
abhd10a	Abhd10	ABHD10
tagln3b	Abhd10	ABHD10
abhd11	Abhd11	ABHD11
abhd12	Abhd12	ABHD12
si:ch211-117n7.7	Abhd12b	ABHD12B
si:ch211-117n7.6	Abhd12b	ABHD12B
abhd13	Abhd13	ABHD13
abhd14a	Abhd14a	ABHD14A
abhd14b	Abhd14b	ABHD14B
abhd15a	Abhd15	ABHD15
abhd16a	Abhd16a	ABHD16A
abhd17ab	Abhd17a	ABHD17A
abhd17aa	Abhd17a	ABHD17A
abhd17b	Abhd17b	ABHD17B
abhd17c	Abhd17c	ABHD17C
abhd18	Abhd18	ABHD18
abhd2b	Abhd2	ABHD2
abhd2a	Abhd2	ABHD2
abhd3	Abhd3	ABHD3
abhd4	Abhd4	ABHD4
abhd6b	Abhd6	ABHD6
abhd6a	Abhd6	ABHD6
abhd8a	Abhd8	ABHD8
abhd8b	Abhd8	ABHD8
abi1b	Abi1	ABI1
abi1a	Abi1	ABI1
abi2a	Abi2	ABI2
abi2b	Abi2	ABI2
abi3b	Abi3	ABI3
abi3a	Abi3	ABI3
abi3bpb	Abi3bp	ABI3BP
abitram	Abitram	ABITRAM
abl1	Abl1	ABL1
abl2	Abl2	ABL2
ablim1a	Ablim1	ABLIM1
ablim1b	Ablim1	ABLIM1
ablim2	Ablim2	ABLIM2
ablim3	Ablim3	ABLIM3
ABR	Abr	ABR
si:dkey-33c9.6	Abr	ABR
abr	Abr	ABR
abraa	Abra	ABRA
si:dkey-29b11.3	Abra	ABRA
abrab	Abra	ABRA
abracl	Abracl	ABRACL
abraxas1	Abraxas1	ABRAXAS1
abraxas2	Abraxas2	ABRAXAS2
abt1	Abt1	ABT1
abtb1	Abtb1	ABTB1
abtb2b	Abtb2	ABTB2
abtb2a	Abtb2	ABTB2
acaa1	Acaa1a	ACAA1
acaa2	Acaa2	ACAA2
acaca	Acaca	ACACA
acacb	Acacb	ACACB
acad11	Acad11	ACAD11
acad8	Acad8	ACAD8
acad9	Acad9	ACAD9
acadl	Acadl	ACADL
acadm	Acadm	ACADM
zgc:85777	Acads	ACADS
acads	Acads	ACADS
acadsb	Acadsb	ACADSB
ACADSB	Acadsb	ACADSB
acadvl	Acadvl	ACADVL
acana	Acan	ACAN
acanb	Acan	ACAN
acap1	Acap1	ACAP1
ACAP2	Acap2	ACAP2
acap2	Acap2	ACAP2
zgc:162872	Acap3	ACAP3
acap3a	Acap3	ACAP3
acap3b	Acap3	ACAP3
acat1	Acat1	ACAT1
acat2	Acat2	ACAT2
ACBD3	Acbd3	ACBD3
acbd3	Acbd3	ACBD3
acbd4	Acbd4	ACBD4
acbd5a	Acbd5	ACBD5
acbd6	Acbd6	ACBD6
acbd7	Acbd7	ACBD7
accs	Accs	ACCS
acd	Acd	ACD
ace	Ace	ACE
ace2	Ace2	ACE2
acer1	Acer1	ACER1
acer2	Acer2	ACER2
acer3	Acer3	ACER3
ache	Ache	ACHE
acin1b	Acin1	ACIN1
acin1a	Acin1	ACIN1
ackr3a	Ackr3	ACKR3
ackr3b	Ackr3	ACKR3
ackr4a	Ackr4	ACKR4
ackr4b	Ackr4	ACKR4
si:ch211-106h4.12	Ackr4	ACKR4
aclyb	Acly	ACLY
aclya	Acly	ACLY
acmsd	Acmsd	ACMSD
acot15	Acnat2	ACOT2
aco1	Aco1	ACO1
aco2	Aco2	ACO2
irg1l	Acod1	ACOD1
acod1	Acod1	ACOD1
acot11a	Acot11	ACOT11
acot11b	Acot11	ACOT11
ACOT12	Acot12	ACOT12
acot13	Acot13	ACOT13
acot21	Acot3	ACOT1
acot22	Acot3	ACOT1
acot20	Acot3	ACOT1
acot19	Acot3	ACOT1
acot18	Acot4	ACOT4
acot16	Acot4	ACOT4
acot14	Acot4	ACOT4
acot17	Acot6	ACOT6
acot7	Acot7	ACOT7
acot8	Acot8	ACOT8
acot9.1	Acot9	ACOT9
acot9.2	Acot9	ACOT9
acox1	Acox1	ACOX1
acox3	Acox3	ACOX3
acoxl	Acoxl	ACOXL
acp1	Acp1	ACP1
acp2	Acp2	ACP2
acp5b	Acp5	ACP5
acp5a	Acp5	ACP5
acp6	Acp6	ACP6
acp7	Acp7	ACP7
acsbg1	Acsbg1	ACSBG1
acsbg2	Acsbg2	ACSBG2
acsf2	Acsf2	ACSF2
ACSF3	Acsf3	ACSF3
acsl1b	Acsl1	ACSL1
acsl1a	Acsl1	ACSL1
acsl3b	Acsl3	ACSL3
acsl3a	Acsl3	ACSL3
acsl4b	Acsl4	ACSL4
acsl4a	Acsl4	ACSL4
acsl5	Acsl5	ACSL5
acsl2	Acsl6	ACSL6
acsm3	Acsm3	ACSM3
acss2l	Acss1	ACSS1
acss1	Acss1	ACSS1
acss2	Acss2	ACSS2
acss3	Acss3	ACSS3
acta1a	Acta1	ACTA1
acta1b	Acta1	ACTA1
ACTC1	Acta1	ACTA1
actc1c	Acta2	ACTA2
acta2	Acta2	ACTA2
si:ch211-241j12.3	Acta2	ACTA2
actb2	Actb	ACTB
actb1	Actb	ACTB
actc1a	Actc1	ACTC1
actc1b	Actc1	ACTC1
actl6a	Actl6a	ACTL6A
actl6b	Actl6b	ACTL6B
actn1	Actn1	ACTN1
actn2b	Actn2	ACTN2
actn3b	Actn3	ACTN3
actn3a	Actn3	ACTN3
actn4	Actn4	ACTN4
actr10	Actr10	ACTR10
actr1	Actr1b	ACTR1B
actr2a	Actr2	ACTR2
actr2b	Actr2	ACTR2
zgc:101810	Actr2	ACTR2
actr3	Actr3	ACTR3
actr3b	Actr3b	ACTR3B
actr5	Actr5	ACTR5
actr6	Actr6	ACTR6
actr8	Actr8	ACTR8
acvr1l	Acvr1	ACVR1
acvr1bb	Acvr1b	ACVR1B
acvr1ba	Acvr1b	ACVR1B
ACVR1C	Acvr1c	ACVR1C
acvr2ab	Acvr2a	ACVR2A
acvr2aa	Acvr2a	ACVR2A
acvr2ba	Acvr2b	ACVR2B
acvrl1	Acvrl1	ACVRL1
acy1	Acy1	ACY1
acy3.1	Acy3	ACY3
acy3.2	Acy3	ACY3
acyp1	Acyp1	ACYP1
acyp2	Acyp2	ACYP2
ada	Ada	ADA
adad1	Adad1	ADAD1
adad2	Adad2	ADAD2
ada2b	Adal	ADAL
adal	Adal	ADAL
ada2a	Adal	ADAL
si:ch1073-396h14.1	Adam10	ADAM10
adam10a	Adam10	ADAM10
adam10b	Adam10	ADAM10
adam11	Adam11	ADAM11
adam12	Adam12	ADAM12
ADAM12	Adam12	ADAM12
adam15	Adam15	ADAM15
adam17a	Adam17	ADAM17
adam17b	Adam17	ADAM17
adam19b	Adam19	ADAM19
adam19a	Adam19	ADAM19
adam22	Adam22	ADAM22
adam23a	Adam23	ADAM23
ADAM23	Adam23	ADAM23
adam28	Adam28	ADAM28
adam8b	Adam8	ADAM8
adam8a	Adam8	ADAM8
zgc:174164	Adam9	ADAM9
adam9	Adam9	ADAM9
adamts1	Adamts1	ADAMTS1
adamts10	Adamts10	ADAMTS10
adamts12	Adamts12	ADAMTS12
adamts13	Adamts13	ADAMTS13
adamts15a	Adamts15	ADAMTS15
adamts16	Adamts16	ADAMTS16
adamts17	Adamts17	ADAMTS17
adamts18	Adamts18	ADAMTS18
adamts2	Adamts2	ADAMTS2
si:ch211-154c21.1	Adamts2	ADAMTS2
adamts3	Adamts3	ADAMTS3
adamts5	Adamts5	ADAMTS5
adamts6	Adamts6	ADAMTS6
ADAMTS7	Adamts7	ADAMTS7
adamts8a	Adamts8	ADAMTS8
adamts9	Adamts9	ADAMTS9
adamtsl2	Adamtsl2	ADAMTSL2
si:ch211-267e7.3	Adamtsl2	ADAMTSL2
adamtsl3	Adamtsl3	ADAMTSL3
adamtsl5	Adamtsl5	ADAMTSL5
zgc:92360	Adap1	ADAP1
adap2	Adap2	ADAP2
adar	Adar	ADAR
adarb1b	Adarb1	ADARB1
adarb1a	Adarb1	ADARB1
adarb2	Adarb2	ADARB2
adat1	Adat1	ADAT1
adat2	Adat2	ADAT2
adat3	Adat3	ADAT3
adck1	Adck1	ADCK1
adck2	Adck2	ADCK2
adck5	Adck5	ADCK5
adcy1a	Adcy1	ADCY1
adcy1b	Adcy1	ADCY1
adcy2a	Adcy2	ADCY2
adcy2b	Adcy2	ADCY2
adcy3a	Adcy3	ADCY3
adcy3b	Adcy3	ADCY3
adcy5	Adcy5	ADCY5
adcy6b	Adcy6	ADCY6
adcy6a	Adcy6	ADCY6
adcy7	Adcy7	ADCY7
si:ch211-132f19.7	Adcy8	ADCY8
si:dkey-206f10.1	Adcy8	ADCY8
adcy8	Adcy8	ADCY8
adcy9	Adcy9	ADCY9
adcyap1a	Adcyap1	ADCYAP1
adcyap1b	Adcyap1	ADCYAP1
adcyap1r1a	Adcyap1r1	ADCYAP1R1
add1	Add1	ADD1
add2	Add2	ADD2
add3b	Add3	ADD3
add3a	Add3	ADD3
adgb	Adgb	ADGB
adgra1a	Adgra1	ADGRA1
adgra2	Adgra2	ADGRA2
adgra3	Adgra3	ADGRA3
adgrb1b	Adgrb1	ADGRB1
adgrb1a	Adgrb1	ADGRB1
adgrb2	Adgrb2	ADGRB2
adgrb3	Adgrb3	ADGRB3
adgrd2	Adgrd1	ADGRD1
adgrd1	Adgrd1	ADGRD1
adgre16	Adgre1	ADGRE1
adgre7	Adgre1	ADGRE1
si:dkey-235d18.5	Adgre1	ADGRE1
adgre9	Adgre4	ADGRE4P
adgre15	Adgre4	ADGRE4P
adgre14	Adgre4	ADGRE4P
adgre10	Adgre4	ADGRE4P
adgre5b.3	Adgre5	ADGRE5
adgre5b.2	Adgre5	ADGRE5
adgrf3b	Adgrf3	ADGRF3
adgrf3a	Adgrf3	ADGRF3
adgrf7	Adgrf5	ADGRF5
adgrf8	Adgrf5	ADGRF5
si:dkey-30j22.1	Adgrf5	ADGRF5
adgrf11	Adgrf5	ADGRF5
adgrf6	Adgrf5	ADGRF5
adgrg1	Adgrg1	ADGRG1
adgrg2a	Adgrg2	ADGRG2
adgrg3	Adgrg3	ADGRG3
adgrg4a	Adgrg4	ADGRG4
adgrg11	Adgrg5	ADGRG5
adgrg6	Adgrg6	ADGRG6
adgrg7.2	Adgrg7	ADGRG7
adgrg7.1	Adgrg7	ADGRG7
adgrl1a	Adgrl1	ADGRL1
si:ch211-226h8.6	Adgrl1	ADGRL1
si:ch211-12h2.8	Adgrl1	ADGRL1
zgc:152936	Adgrl1	ADGRL1
si:dkey-179j5.5	Adgrl1	ADGRL1
si:dkeyp-98a7.8	Adgrl1	ADGRL1
si:dkey-90l23.2	Adgrl1	ADGRL1
adgrl2a	Adgrl2	ADGRL2
si:ch1073-75o15.4	Adgrl3	ADGRL3
zgc:171776	Adgrl3	ADGRL3
si:dkeyp-46h3.2	Adgrl3	ADGRL3
si:dkey-240e12.6	Adgrl3	ADGRL3
adgrl2b.1	Adgrl3	ADGRL3
si:ch73-189n23.1	Adgrl3	ADGRL3
si:dkeyp-46h3.3	Adgrl3	ADGRL3
si:dkeyp-46h3.6	Adgrl3	ADGRL3
si:dkey-90l23.1	Adgrl3	ADGRL3
si:dkeyp-46h3.8	Adgrl3	ADGRL3
si:ch211-250e5.16	Adgrl3	ADGRL3
adgrl3.1	Adgrl3	ADGRL3
si:ch211-226h8.14	Adgrl3	ADGRL3
si:ch211-226h8.4	Adgrl3	ADGRL3
zgc:136410	Adgrl3	ADGRL3
zgc:171717	Adgrl3	ADGRL3
zgc:172218	Adgrl3	ADGRL3
si:ch211-226h8.8	Adgrl3	ADGRL3
adgrl4	Adgrl4	ADGRL4
adgrv1	Adgrv1	ADGRV1
adh8a	Adh1	ADH1C
zgc:77938	Adh5	ADH5
zgc:63568	Adh5	ADH5
adh5	Adh5	ADH5
adh8b	Adh7	ADH7
adhfe1	Adhfe1	ADHFE1
adi1	Adi1	ADI1
adipoqb	Adipoq	ADIPOQ
adipoqa	Adipoq	ADIPOQ
adipor1b	Adipor1	ADIPOR1
adipor1a	Adipor1	ADIPOR1
adipor2	Adipor2	ADIPOR2
adka	Adk	ADK
adkb	Adk	ADK
adma	Adm	ADM
admb	Adm	ADM
adm2a	Adm2	ADM2
adm2b	Adm2	ADM2
adnpb	Adnp	ADNP
adnpa	Adnp	ADNP
adnp2a	Adnp2	ADNP2
adnp2b	Adnp2	ADNP2
adoa	Ado	ADO
adob	Ado	ADO
adora1b	Adora1	ADORA1
adora2aa	Adora2a	ADORA2A
adora2ab	Adora2a	ADORA2A
adora2b	Adora2b	ADORA2B
adora4a	Adora3	ADORA3
adpgk	Adpgk	ADPGK
adpgk2	Adpgk	ADPGK
adprh	Adprh	ADPRH
adprhl1	Adprhl1	ADPRHL1
adprm	Adprm	ADPRM
adprhl2	Adprs
adra1aa	Adra1a	ADRA1A
adra1ab	Adra1a	ADRA1A
adra1ba	Adra1b	ADRA1B
adra1bb	Adra1b	ADRA1B
adra1d	Adra1d	ADRA1D
adra2db	Adra2a	ADRA2A
adra2a	Adra2a	ADRA2A
adra2da	Adra2a	ADRA2A
adra2b	Adra2b	ADRA2B
adra2c	Adra2c	ADRA2C
adrb1	Adrb1	ADRB1
adrb2a	Adrb2	ADRB2
taar19t	Adrb2	ADRB2
adrb2b	Adrb2	ADRB2
adrb3a	Adrb3	ADRB3
adrb3b	Adrb3	ADRB3
adrm1	Adrm1	ADRM1
adsl	Adsl	ADSL
adss2	Adss	ADSS2
adssl	Adss	ADSS2
adtrp1	Adtrp	ADTRP
aebp1	Aebp1	AEBP1
si:ch1073-459j12.1	Aebp1	AEBP1
aebp2	Aebp2	AEBP2
afap1	Afap1	AFAP1
afap1l1b	Afap1l1	AFAP1L1
afap1l1a	Afap1l1	AFAP1L1
si:dkey-220o5.5	Afap1l2	AFAP1L2
afap1l2	Afap1l2	AFAP1L2
afdna	Afdn	AFDN
aff2	Aff2	AFF2
aff3	Aff3	AFF3
aff4	Aff4	AFF4
afg1la	Afg1l	AFG1L
afg1lb	Afg1l	AFG1L
si:ch1073-174d20.2	Afg3l1	AFG3L2
afg3l2	Afg3l2	AFG3L2
afmid	Afmid	AFMID
si:dkey-193c22.1	Afmid	AFMID
aftpha	Aftph	AFTPH
aftphb	Aftph	AFTPH
aga	Aga	AGA
agap1	Agap1	AGAP1
agap2	Agap2	AGAP2
agap3	Agap3	AGAP3
agbl1	Agbl1	AGBL1
agbl2	Agbl2	AGBL2
agbl4	Agbl4	AGBL4
agbl5	Agbl5	AGBL5
si:ch211-79k12.1	Ager	AGER
agfg1b	Agfg1	AGFG1
agfg1a	Agfg1	AGFG1
zgc:114045	Agfg2	AGFG2
aggf1	Aggf1	AGGF1
agk	Agk	AGK
aglb	Agl	AGL
agla	Agl	AGL
agmat	Agmat	AGMAT
agmo	Agmo	AGMO
ago1	Ago1	AGO1
ago2	Ago2	AGO2
ago3b	Ago3	AGO3
ago3a	Ago3	AGO3
ago4	Ago4	AGO4
agpat2	Agpat1	AGPAT1
agpat3	Agpat3	AGPAT3
agpat4	Agpat4	AGPAT4
agpat5	Agpat5	AGPAT5
agps	Agps	AGPS
agr2	Agr2	AGR2
agr1	Agr3	AGR3
agrn	Agrn	AGRN
asip2b	Agrp	AGRP
agrp	Agrp	AGRP
agt	Agt	AGT
agtpbp1	Agtpbp1	AGTPBP1
agtr1a	Agtr1b	AGTR1
agtr1b	Agtr1b	AGTR1
agtr2	Agtr2	AGTR2
agtrap	Agtrap	AGTRAP
agxtb	Agxt	AGXT
agxta	Agxt	AGXT
agxt2	Agxt2	AGXT2
ahctf1	Ahctf1	AHCTF1
ahcy	Ahcy	AHCY
ahcyl1	Ahcyl1	AHCYL1
ahdc1	Ahdc1	AHDC1
ahi1	Ahi1	AHI1
ahnak	Ahnak	AHNAK
si:ch211-125o16.4	Ahnak	AHNAK
si:ch211-69b7.6	Ahnak	AHNAK
ahr1a	Ahr	AHR
ahr1b	Ahr	AHR
ahr2	Ahr	AHR
ahrra	Ahrr	AHRR
ahrrb	Ahrr	AHRR
ahsa1b	Ahsa1	AHSA1
ahsa1a	Ahsa1	AHSA1
ahsg2	Ahsg	AHSG
ahsg1	Ahsg	AHSG
smim29	AI413582	SMIM29
si:dkey-183i3.9	AI593442	C11orf87
si:dkey-35i13.1	AI593442	C11orf87
si:ch73-299h12.8	AI854703	LOC728743
aicda	Aicda	AICDA
aida	Aida	AIDA
aif1l	Aif1l	AIF1L
aifm1	Aifm1	AIFM1
aifm2	Aifm2	AIFM2
aifm3	Aifm3	AIFM3
aifm4	Aifm3	AIFM3
aifm5	Aifm3	AIFM3
aig1	Aig1	AIG1
aimp1a	Aimp1	AIMP1
aimp1b	Aimp1	AIMP1
aimp2	Aimp2	AIMP2
aip	Aip	AIP
aipl1	Aipl1	AIPL1
aire	Aire	AIRE
ajap1	Ajap1	AJAP1
ajuba	Ajuba	AJUBA
ak1	Ak1	AK1
ak2	Ak2	AK2
ak3	Ak3	AK3
ak4	Ak4	AK4
ak5l	Ak5	AK5
ak5	Ak5	AK5
AK6	Ak6	AK6
ak7a	Ak7	AK7
ak7b	Ak7	AK7
ak8	Ak8	AK8
ak9	Ak9	AK9
akap1a	Akap1	AKAP1
akap1b	Akap1	AKAP1
akap10	Akap10	AKAP10
akap11	Akap11	AKAP11
akap12a	Akap12	AKAP12
akap12b	Akap12	AKAP12
akap13	Akap13	AKAP13
si:dkey-172h23.2	Akap13	AKAP13
si:dkeyp-81f3.4	Akap14	AKAP14
akap17a	Akap17b	AKAP17A
si:dkey-125i10.3	Akap5	AKAP5
akap6	Akap6	AKAP6
akap7	Akap7	AKAP7
akap8l	Akap8l	AKAP8L
akap9	Akap9	AKAP9
akip1	Akip1	AKIP1
akirin1	Akirin1	AKIRIN1
akirin2	Akirin2	AKIRIN2
akna	Akna	AKNA
aknad1	Aknad1	AKNAD1
akr1a1b	Akr1a1	AKR1A1
zgc:101765	Akr1a1	AKR1A1
akr1a1a	Akr1a1	AKR1A1
zgc:110782	Akr1b10	AKR1B10
zgc:110366	Akr1b10	AKR1B10
akr1b1.1	Akr1b3	AKR1B1
akr1b1.2	Akr1b3	AKR1B1
zgc:56622	Akr1c19	AKR1C4
akr7a3	Akr7a5	AKR7A2
akt1	Akt1	AKT1
akt1s1	Akt1s1	AKT1S1
akt2	Akt2	AKT2
akt2l	Akt2	AKT2
akt3a	Akt3	AKT3
akt3b	Akt3	AKT3
aktip	Aktip	AKTIP
alad	Alad	ALAD
alas1	Alas1	ALAS1
alas2	Alas2	ALAS2
alcama	Alcam	ALCAM
alcamb	Alcam	ALCAM
aldh16a1	Aldh16a1	ALDH16A1
aldh18a1	Aldh18a1	ALDH18A1
aldh1a2	Aldh1a2	ALDH1A2
aldh1a3	Aldh1a3	ALDH1A3
aldh1l1	Aldh1l1	ALDH1L1
aldh1l2	Aldh1l2	ALDH1L2
aldh2.2	Aldh2	ALDH2
aldh2.1	Aldh2	ALDH2
aldh3a1	Aldh3a1	ALDH3A1
aldh3a2a	Aldh3a2	ALDH3A2
aldh3a2b	Aldh3a2	ALDH3A2
aldh3b1	Aldh3b1	ALDH3B1
aldh3b2	Aldh3b2	ALDH3B2
aldh4a1	Aldh4a1	ALDH4A1
aldh5a1	Aldh5a1	ALDH5A1
aldh6a1	Aldh6a1	ALDH6A1
aldh7a1	Aldh7a1	ALDH7A1
aldh8a1	Aldh8a1	ALDH8A1
aldh9a1b	Aldh9a1	ALDH9A1
aldh9a1a.2	Aldh9a1	ALDH9A1
aldh9a1a.1	Aldh9a1	ALDH9A1
aldoab	Aldoa	ALDOA
aldoaa	Aldoart2	ALDOA
aldob	Aldob	ALDOB
aldocb	Aldoc	ALDOC
aldoca	Aldoc	ALDOC
alg1	Alg1	ALG1
alg10	Alg10b	ALG10
alg11	Alg11	ALG11
alg12	Alg12	ALG12
alg13	Alg13	ALG13
alg14	Alg14	ALG14
alg2	Alg2	ALG2
alg3	Alg3	ALG3
alg5	Alg5	ALG5
alg6	Alg6	ALG6
alg8	Alg8	ALG8
alg9	Alg9	ALG9
alk	Alk	ALK
ltk	Alk	ALK
alkal1	Alkal1	ALKAL1
alkal2a	Alkal2	ALKAL2
alkal2b	Alkal2	ALKAL2
alkbh1	Alkbh1	ALKBH1
alkbh2	Alkbh2	ALKBH2
alkbh3	Alkbh3	ALKBH3
alkbh4	Alkbh4	ALKBH4
alkbh5	Alkbh5	ALKBH5
alkbh6	Alkbh6	ALKBH6
alkbh7	Alkbh7	ALKBH7
alkbh8	Alkbh8	ALKBH8
allc	Allc	ALLC
alms1	Alms1	ALMS1
alox12	Alox12	ALOX12
zgc:152891	Alox12b	ALOX12B
alox5b.1	Alox5	ALOX5
alox5b.3	Alox5	ALOX5
alox5b.2	Alox5	ALOX5
alox5a	Alox5	ALOX5
alox5ap	Alox5ap	ALOX5AP
si:dkey-17e16.9	Aloxe3	ALOXE3
alpi.1	Alpi	ALPI
alpi.2	Alpi	ALPI
alpk2	Alpk2	ALPK2
alpk3b	Alpk3	ALPK3
alpk3a	Alpk3	ALPK3
alp3	Alpl	ALPL
alpl	Alpl	ALPL
als2b	Als2	ALS2
als2a	Als2	ALS2
alx1	Alx1	ALX1
alx4a	Alx4	ALX4
alx4b	Alx4	ALX4
alyref	Alyref	ALYREF
amacr	Amacr	AMACR
ambp	Ambp	AMBP
ambra1a	Ambra1	AMBRA1
ambra1b	Ambra1	AMBRA1
amd1	Amd2	AMD1
AMDHD1	Amdhd1	AMDHD1
amdhd2	Amdhd2	AMDHD2
amer1	Amer1	AMER1
si:ch211-244c8.4	Amer2	AMER2
amer2	Amer2	AMER2
si:dkey-231j24.3	Amer3	AMER3
amfrb	Amfr	AMFR
amfra	Amfr	AMFR
amh	Amh	AMH
amigo1	Amigo1	AMIGO1
amigo3	Amigo3	AMIGO3
ammecr1	Ammecr1	AMMECR1
amn	Amn	AMN
amn1	Amn1	AMN1
amot	Amot	AMOT
amotl2a	Amotl2	AMOTL2
amotl2b	Amotl2	AMOTL2
ampd1	Ampd1	AMPD1
ampd2a	Ampd2	AMPD2
ampd2b	Ampd2	AMPD2
ampd3a	Ampd3	AMPD3
ampd3b	Ampd3	AMPD3
amph	Amph	AMPH
amt	Amt	AMT
zgc:92137	Amy1	AMY1A
zgc:66313	Amy1	AMY1A
amy2a	Amy2a5	AMY2B
anapc1	Anapc1	ANAPC1
anapc10	Anapc10	ANAPC10
anapc11	Anapc11	ANAPC11
anapc13	Anapc13	ANAPC13
anapc15	Anapc15	ANAPC15
anapc16	Anapc16	ANAPC16
anapc2	Anapc2	ANAPC2
anapc4	Anapc4	ANAPC4
anapc5	Anapc5	ANAPC5
anapc7	Anapc7	ANAPC7
rnasel4	Ang	ANG
rnasel3	Ang4	ANG
rnasel2	Ang5	ANG
angel1	Angel1	ANGEL1
angel2	Angel2	ANGEL2
angpt1	Angpt1	ANGPT1
si:ch211-203k16.3	Angpt2	ANGPT2
angpt2a	Angpt2	ANGPT2
angpt2b	Angpt2	ANGPT2
angpt4	Angpt4	ANGPT4
angptl1a	Angptl1	ANGPTL1
angptl1b	Angptl1	ANGPTL1
angptl2a	Angptl2	ANGPTL2
angptl2b	Angptl2	ANGPTL2
angptl3	Angptl3	ANGPTL3
angptl4	Angptl4	ANGPTL4
angptl6	Angptl6	ANGPTL6
zgc:194887	Angptl6	ANGPTL6
angptl7	Angptl7	ANGPTL7
si:ch211-157b11.8	Angptl7	ANGPTL7
si:dkey-114l24.2	Angptl8	ANGPTL8
ankhb	Ank	ANKH
ankha	Ank	ANKH
ank1b	Ank1	ANK1
caiap	Ank1	ANK1
ank1a	Ank1	ANK1
ank2b	Ank2	ANK2
ank2a	Ank2	ANK2
ank3a	Ank3	ANK3
ank3b	Ank3	ANK3
ankar	Ankar	ANKAR
ankdd1a	Ankdd1a	ANKDD1A
ankdd1b	Ankdd1b	ANKDD1B
ankef1b	Ankef1	ANKEF1
ankef1a	Ankef1	ANKEF1
ANKFN1	Ankfn1	ANKFN1
ankfy1	Ankfy1	ANKFY1
ankhd1	Ankhd1	ANKHD1-EIF4EBP3
ankib1b	Ankib1	ANKIB1
ankib1a	Ankib1	ANKIB1
ankk1	Ankk1	ANKK1
zgc:85936	Ankle1	ANKLE1
ankle2	Ankle2	ANKLE2
ankmy1	Ankmy1	ANKMY1
ankmy2a	Ankmy2	ANKMY2
ankmy2b	Ankmy2	ANKMY2
ankra2	Ankra2	ANKRA2
ankrd1b	Ankrd1	ANKRD1
ankrd1a	Ankrd1	ANKRD1
ankrd10a	Ankrd10	ANKRD10
ankrd10b	Ankrd10	ANKRD10
ankrd11	Ankrd11	ANKRD11
ankrd31	Ankrd12	ANKRD12
ankrd12	Ankrd12	ANKRD12
ankrd13a	Ankrd13a	ANKRD13A
ankrd13b	Ankrd13b	ANKRD13B
ankrd13c	Ankrd13c	ANKRD13C
ankrd13d	Ankrd13d	ANKRD13D
ankrd16	Ankrd16	ANKRD16
znf1160	Ankrd17	ANKRD17
ankrd2	Ankrd2	ANKRD2
ankrd22	Ankrd22	ANKRD22
ankrd24	Ankrd24	ANKRD24
si:ch211-272n13.3	Ankrd26	ANKRD26
ankrd27	Ankrd27	ANKRD27
ankrd28b	Ankrd28	ANKRD28
ankrd29	Ankrd29	ANKRD29
ankrd33aa	Ankrd33	ANKRD33
ankrd33ab	Ankrd33	ANKRD33
ankrd33ba	Ankrd33b	ANKRD33B
ankrd33bb	Ankrd33b	ANKRD33B
ankrd34ba	Ankrd34b	ANKRD34B
ankrd34bb	Ankrd34b	ANKRD34B
ankrd37	Ankrd37	ANKRD37
ankrd39	Ankrd39	ANKRD39
ankrd40	Ankrd40	ANKRD40
ankrd44	Ankrd44	ANKRD44
ankrd45	Ankrd45	ANKRD45
ankrd46b	Ankrd46	ANKRD46
ankrd46a	Ankrd46	ANKRD46
ankrd49	Ankrd49	ANKRD49
ankrd50l	Ankrd50	ANKRD50
zgc:172215	Ankrd50	ANKRD50
si:cabz01054396.2	Ankrd52	ANKRD52
ankrd52a	Ankrd52	ANKRD52
si:ch211-1o7.2	Ankrd53	ANKRD53
ankrd54	Ankrd54	ANKRD54
ankrd55	Ankrd55	ANKRD55
ankrd6a	Ankrd6	ANKRD6
ankrd6b	Ankrd6	ANKRD6
si:ch211-203b8.6	Ankrd65	ANKRD65
ANKRD66	Ankrd66	ANKRD66
ankrd9	Ankrd9	ANKRD9
zgc:112001	Ankrd9	ANKRD9
anks1ab	Anks1	ANKS1A
anks1b	Anks1b	ANKS1B
anks3	Anks3	ANKS3
anks4b	Anks4b	ANKS4B
ankzf1	Ankzf1	ANKZF1
anln	Anln	ANLN
si:dkey-30c15.10	Anln	ANLN
ano1	Ano1	ANO1
ano10b	Ano10	ANO10
ano10a	Ano10	ANO10
ano2b	Ano2	ANO2
ano3	Ano3	ANO3
ano5b	Ano5	ANO5
ano5a	Ano5	ANO5
ano6	Ano6	ANO6
ano11	Ano7	ANO7
ANO7	Ano7	ANO7
ano8b	Ano8	ANO8
ano8a	Ano8	ANO8
ano9b	Ano9	ANO9
anp32a	Anp32a	ANP32A
anp32b	Anp32b	ANP32B
anp32e	Anp32e	ANP32E
anpepb	Anpep	ANPEP
erap2	Anpep	ANPEP
si:ch211-276a23.5	Anpep	ANPEP
anpepa	Anpep	ANPEP
ANPEP	Anpep	ANPEP
si:dkey-190g11.3	Antkmt
antkmt	Antkmt
antxr1a	Antxr1	ANTXR1
antxr1b	Antxr1	ANTXR1
antxr1c	Antxr1	ANTXR1
antxr2a	Antxr2	ANTXR2
antxr2b	Antxr2	ANTXR2
antxr1d	Antxrl	ANTXRL
anxa1d	Anxa1	ANXA1
anxa1c	Anxa1	ANXA1
anxa1a	Anxa1	ANXA1
anxa1b	Anxa1	ANXA1
anxa11b	Anxa11	ANXA11
anxa11a	Anxa11	ANXA11
anxa13	Anxa13	ANXA13
anxa13l	Anxa13	ANXA13
anxa2b	Anxa2	ANXA2
anxa2a	Anxa2	ANXA2
zgc:101785	Anxa2	ANXA2
anxa3b	Anxa3	ANXA3
anxa3a	Anxa3	ANXA3
anxa4	Anxa4	ANXA4
anxa5a	Anxa5	ANXA5
anxa5b	Anxa5	ANXA5
anxa6	Anxa6	ANXA6
prnprs3	Anxa7	ANXA7
aoc1	Aoc1	AOC1
aoc2	Aoc3	AOC3
aopep	Aopep	AOPEP
aox6	Aox1	AOX1
aox5	Aox2	XDH
ap1ar	Ap1ar	AP1AR
ap1b1	Ap1b1	AP1B1
ap1g1	Ap1g1	AP1G1
ap1g2	Ap1g2	AP1G2
ap1m1	Ap1m1	AP1M1
ap1m3	Ap1m2	AP1M2
ap1m2	Ap1m2	AP1M2
ap1s1	Ap1s1	AP1S1
ap1s2	Ap1s2	AP1S2
ap1s3b	Ap1s3	AP1S3
ap1s3a	Ap1s3	AP1S3
ap2a1	Ap2a1	AP2A1
ap2b1	Ap2b1	AP2B1
ap2m1a	Ap2m1	AP2M1
ap2m1b	Ap2m1	AP2M1
ap2s1	Ap2s1	AP2S1
ap3b1a	Ap3b1	AP3B1
AP3B2	Ap3b2	AP3B2
ap3d1	Ap3d1	AP3D1
ap3m1	Ap3m1	AP3M1
ap3m2	Ap3m2	AP3M2
ap3s2	Ap3s2	AP3S2
ap4b1	Ap4b1	AP4B1
ap4e1	Ap4e1	AP4E1
ap4m1	Ap4m1	AP4M1
ap4s1	Ap4s1	AP4S1
ap5b1	Ap5b1	AP5B1
ap5m1	Ap5m1	AP5M1
ap5s1	Ap5s1	AP5S1
ap5z1	Ap5z1	AP5Z1
apaf1	Apaf1	APAF1
apba1a	Apba1	APBA1
apba1b	Apba1	APBA1
apba2a	Apba2	APBA2
apba2b	Apba2	APBA2
apbb1	Apbb1	APBB1
apbb1ip	Apbb1ip	APBB1IP
apbb2b	Apbb2	APBB2
apbb3	Apbb3	APBB3
apc	Apc	APC
apc2	Apc2	APC2
apcdd1l	Apcdd1	APCDD1
crp6	Apcs	APCS
si:ch211-270n8.1	Apcs	APCS
apeh	Apeh	APEH
zgc:136971	Apeh	APEH
apela	Apela	APELA
apex1	Apex1	APEX1
apex2	Apex2	APEX2
aph1b	Aph1b	APH1B
zgc:114200	Aph1c	APH1B
api5	Api5	API5
apip	Apip	APIP
zgc:165656	Aplf	APLF
apln	Apln	APLN
aplnr2	Aplnr	APLNR
aplnra	Aplnr	APLNR
aplnrb	Aplnr	APLNR
aplp1	Aplp1	APLP1
aplp2	Aplp2	APLP2
apmap	Apmap	APMAP
zgc:194209	Apmap	APMAP
zgc:162608	Apoa1	APOA1
apoa1a	Apoa1	APOA1
si:dkey-7f3.14	Apoa1	APOA1
apoa1b	Apoa1	APOA1
afp4	Apoa2	APOA2
apoa4b.1	Apoa4	APOA4
apoa4a	Apoa4	APOA4
apoa4b.2	Apoa4	APOA4
apobb.2	Apob	APOB
vtg5	Apob	APOB
vtg7	Apob	APOB
apobb.1	Apob	APOB
vtg2	Apob	APOB
vtg4	Apob	APOB
si:dkey-4c23.3	Apob	APOB
apoba	Apob	APOB
vtg3	Apob	APOB
vtg6	Apob	APOB
vtg1	Apob	APOB
apobec2b	Apobec2	APOBEC2
apobec2a	Apobec2	APOBEC2
apoc1	Apoc1	APOC1
apoc2	Apoc2	APOC2
apodb	Apod	APOD
apoda.2	Apod	APOD
apoda.1	Apod	APOD
apoeb	Apoe	APOE
apoea	Apoe	APOE
apof	Apof	APOF
ntd5	Apoh	APOH
si:rp71-1g18.13	Apol10b	APOL1
si:dkey-192d15.1	Apol11a	APOL4
si:dkey-192d15.2	Apol6	APOL6
si:ch73-233k15.2	Apol7b	APOL3
apol1	Apol7b	APOL3
si:ch211-217i17.1	Apol7e	APOL2
si:ch211-285c6.2	Apol7e	APOL2
si:ch73-122k23.1	Apol7e	APOL2
si:cabz01007807.1	Apol8	APOL2
si:cabz01007802.1	Apol8	APOL2
apom	Apom	APOM
apoob	Apoo	APOO
apooa	Apoo	APOO
apool	Apool	APOOL
appa	App	APP
appb	App	APP
appbp2	Appbp2	APPBP2
hesx1	Appl1	APPL1
aprt	Aprt	APRT
zgc:174895	Aprt	APRT
aptx	Aptx	APTX
aqp1a.2	Aqp1	AQP1
aqp1a.1	Aqp1	AQP1
aqp11	Aqp11	AQP11
aqp12	Aqp12	AQP12B
aqp3a	Aqp3	AQP3
aqp3b	Aqp3	AQP3
aqp4	Aqp4	AQP4
aqp7	Aqp7	AQP7
aqp8b	Aqp8	AQP8
aqp8a.2	Aqp8	AQP8
aqp8a.1	Aqp8	AQP8
aqp10a	Aqp9	AQP9
aqp9b	Aqp9	AQP9
aqp10b	Aqp9	AQP9
aqr	Aqr	AQR
ar	Ar	AR
araf	Araf	ARAF
arap1a	Arap1	ARAP1
arap3	Arap3	ARAP3
arcn1a	Arcn1	ARCN1
arcn1b	Arcn1	ARCN1
areg	Areg	AREG
AREL1	Arel1	AREL1
arf1	Arf1	ARF1
si:ch1073-165f9.2	Arf1	ARF1
arf2a	Arf1	ARF1
arf4b	Arf1	ARF1
arf2b	Arf2	ARF1
zgc:110286	Arf2	ARF1
arf3b	Arf3	ARF3
arf3a	Arf3	ARF3
arf4a	Arf4	ARF4
arf5	Arf5	ARF5
ARF5	Arf5	ARF5
arf6a	Arf6	ARF6
arf6b	Arf6	ARF6
arfgap1	Arfgap1	ARFGAP1
arfgap2	Arfgap2	ARFGAP2
arfgap3	Arfgap3	ARFGAP3
arfgef1	Arfgef1	ARFGEF1
arfgef2	Arfgef2	ARFGEF2
arfgef3	Arfgef3	ARFGEF3
arfip1	Arfip1	ARFIP1
arfip2b	Arfip2	ARFIP2
arfip2a	Arfip2	ARFIP2
arfrp1	Arfrp1	ARFRP1
arg1	Arg1	ARG1
arg2	Arg2	ARG2
arglu1a	Arglu1	ARGLU1
arglu1b	Arglu1	ARGLU1
arhgap1	Arhgap1	ARHGAP1
arhgap10	Arhgap10	ARHGAP10
zgc:153345	Arhgap11a	ARHGAP11A
arhgap11a	Arhgap11a	ARHGAP11A
arhgap12a	Arhgap12	ARHGAP12
arhgap12b	Arhgap12	ARHGAP12
arhgap15	Arhgap15	ARHGAP15
arhgap17b	Arhgap17	ARHGAP17
arhgap17a	Arhgap17	ARHGAP17
arhgap18	Arhgap18	ARHGAP18
arhgap19	Arhgap19	ARHGAP19
arhgap20	Arhgap20	ARHGAP20
arhgap20b	Arhgap20	ARHGAP20
arhgap21b	Arhgap21	ARHGAP21
arhgap21a	Arhgap21	ARHGAP21
arhgap22	Arhgap22	ARHGAP22
si:ch211-247j9.1	Arhgap22	ARHGAP22
arhgap23b	Arhgap23	ARHGAP23
arhgap23a	Arhgap23	ARHGAP23
arhgap24	Arhgap24	ARHGAP24
arhgap25	Arhgap25	ARHGAP25
arhgap27	Arhgap27	ARHGAP27
arhgap27l	Arhgap27	ARHGAP27
arhgap28	Arhgap28	ARHGAP28
arhgap29a	Arhgap29	ARHGAP29
arhgap29b	Arhgap29	ARHGAP29
si:dkeyp-68b7.12	Arhgap30	ARHGAP30
arhgap31	Arhgap31	ARHGAP31
arhgap32a	Arhgap32	ARHGAP32
si:dkey-219e20.2	Arhgap32	ARHGAP32
arhgap32b	Arhgap32	ARHGAP32
arhgap33	Arhgap33	ARHGAP33
arhgap35b	Arhgap35	ARHGAP35
arhgap35a	Arhgap35	ARHGAP35
arhgap36	Arhgap36	ARHGAP36
si:ch211-218g4.2	Arhgap39	ARHGAP39
arhgap39	Arhgap39	ARHGAP39
zgc:92107	Arhgap39	ARHGAP39
arhgap4b	Arhgap4	ARHGAP4
arhgap4a	Arhgap4	ARHGAP4
arhgap42a	Arhgap42	ARHGAP42
arhgap44	Arhgap44	ARHGAP44
ARHGAP44	Arhgap44	ARHGAP44
arhgap45a	Arhgap45	ARHGAP45
arhgap45b	Arhgap45	ARHGAP45
arhgap5	Arhgap5	ARHGAP5
ARHGAP6	Arhgap6	ARHGAP6
arhgdia	Arhgdia	ARHGDIA
arhgdig	Arhgdib	ARHGDIB
arhgef1b	Arhgef1	ARHGEF1
arhgef10	Arhgef10	ARHGEF10
arhgef10lb	Arhgef10l	ARHGEF10L
arhgef10la	Arhgef10l	ARHGEF10L
plekhg7	Arhgef11	ARHGEF11
arhgef11	Arhgef11	ARHGEF11
arhgef12a	Arhgef12	ARHGEF12
arhgef12b	Arhgef12	ARHGEF12
arhgef15	Arhgef15	ARHGEF15
si:dkey-38p12.3	Arhgef15	ARHGEF15
arhgef16	Arhgef16	ARHGEF16
ARHGEF17	Arhgef17	ARHGEF17
arhgef18a	Arhgef18	ARHGEF18
arhgef18b	Arhgef18	ARHGEF18
arhgef19	Arhgef19	ARHGEF19
si:ch73-15b2.5	Arhgef19	ARHGEF19
arhgef1a	Arhgef2	ARHGEF2
arhgef2	Arhgef2	ARHGEF2
arhgef25b	Arhgef25	ARHGEF25
arhgef28a	Arhgef28	ARHGEF28
arhgef3l	Arhgef3	ARHGEF3
arhgef3	Arhgef3	ARHGEF3
arhgef33	Arhgef33	ARHGEF33
arhgef37	Arhgef37	ARHGEF37
arhgef38	Arhgef38	ARHGEF38
arhgef39	Arhgef39	ARHGEF39
arhgef4	Arhgef4	ARHGEF4
arhgef40	Arhgef40	ARHGEF40
arhgef6	Arhgef6	ARHGEF6
arhgef7a	Arhgef7	ARHGEF7
arhgef7b	Arhgef7	ARHGEF7
arhgef9a	Arhgef9	ARHGEF9
arhgef9b	Arhgef9	ARHGEF9
arid1aa	Arid1a	ARID1A
arid1ab	Arid1a	ARID1A
arid1b	Arid1b	ARID1B
arid2	Arid2	ARID2
arid3c	Arid3a	ARID3A
arid3a	Arid3a	ARID3A
arid3b	Arid3b	ARID3B
arid4a	Arid4a	ARID4A
tomm20a	Arid4b	ARID4B
arid5a	Arid5a	ARID5A
arid6	Arid5b	ARID5B
arid5b	Arid5b	ARID5B
zgc:77151	Arid5b	ARID5B
arih1l	Arih1	ARIH1
arih1	Arih1	ARIH1
si:ch211-284e13.9	Arih2	ARIH2
arih2	Arih2	ARIH2
arl1	Arl1	ARL1
arl11	Arl11	ARL11
arl13a	Arl13a	ARL13A
arl13b	Arl13b	ARL13B
arl14	Arl14	ARL14
arl14ep	Arl14ep	ARL14EP
arl15b	Arl15	ARL15
arl15a	Arl15	ARL15
arl16	Arl16	ARL16
arl2	Arl2	ARL2
arl2bp	Arl2bp	ARL2BP
arl3l2	Arl3	ARL3
arl3l1	Arl3	ARL3
arl3a	Arl3	ARL3
arl3b	Arl3	ARL3
arl4aa	Arl4a	ARL4A
arl4ab	Arl4a	ARL4A
arl4cb	Arl4c	ARL4C
arl4ca	Arl4c	ARL4C
arl4d	Arl4d	ARL4D
arl5a	Arl5a	ARL5A
arl8	Arl5b	ARL5B
arl5c	Arl5c	ARL5C
arl6	Arl6	ARL6
arl6ip1	Arl6ip1	ARL6IP1
arl6ip4	Arl6ip4	ARL6IP4
arl6ip5a	Arl6ip5	ARL6IP5
arl6ip5b	Arl6ip5	ARL6IP5
arl6ip6	Arl6ip6	ARL6IP6
arl8a	Arl8a	ARL8A
arl8bb	Arl8b	ARL8B
arl8ba	Arl8b	ARL8B
arl9	Arl9	ARL9
armc1l	Armc1	ARMC1
armc1	Armc1	ARMC1
armc10	Armc10	ARMC10
armc2	Armc2	ARMC2
armc3	Armc3	ARMC3
armc5	Armc5	ARMC5
ARMC6	Armc6	ARMC6
armc7	Armc7	ARMC7
armc8	Armc8	ARMC8
armc9	Armc9	ARMC9
armh1	Armh1	ARMH1
armh3	Armh3	ARMH3
armt1	Armt1	ARMT1
arnt	Arnt	ARNT
arnt2	Arnt2	ARNT2
arntl1a	Arntl	ARNTL
arntl1b	Arntl	ARNTL
arntl2	Arntl2	ARNTL2
zgc:86896	Arpc1a	ARPC1A
arpc1a	Arpc1a	ARPC1A
arpc1b	Arpc1b	ARPC1B
arpc2	Arpc2	ARPC2
arpc3	Arpc3	ARPC3
arpc4l	Arpc4	ARPC4
arpc4	Arpc4	ARPC4
arpc5a	Arpc5	ARPC5
arpc5b	Arpc5	ARPC5
arpc5la	Arpc5l	ARPC5L
arpc5lb	Arpc5l	ARPC5L
arpin	Arpin	ARPIN
arpp19b	Arpp19	ARPP19
arpp19a	Arpp19	ARPP19
arpp21	Arpp21	ARPP21
arr3b	Arr3	ARR3
arr3a	Arr3	ARR3
arrb1	Arrb1	ARRB1
arrb2a	Arrb2	ARRB2
arrb2b	Arrb2	ARRB2
arrdc1a	Arrdc1	ARRDC1
arrdc1b	Arrdc1	ARRDC1
arrdc2	Arrdc2	ARRDC2
zgc:110353	Arrdc2	ARRDC2
zgc:110626	Arrdc2	ARRDC2
si:ch211-130m23.2	Arrdc2	ARRDC2
arrdc3a	Arrdc3	ARRDC3
arrdc3b	Arrdc3	ARRDC3
arsa	Arsa	ARSA
ARSB	Arsb	ARSB
arsg	Arsg	ARSG
arsib	Arsi	ARSI
arsia	Arsi	ARSI
arsj	Arsj	ARSJ
arsk	Arsk	ARSK
si:ch211-145b13.6	Art1	ART1
zmp:0000000997	Art5	ART5
art4	Art5	ART5
si:ch211-51i16.1	Art5	ART5
arv1	Arv1	ARV1
arvcfa	Arvcf	ARVCF
arvcfb	Arvcf	ARVCF
arxa	Arx	ARX
arxb	Arx	ARX
zgc:153372	As3mt	AS3MT
as3mt	As3mt	AS3MT
asah1a	Asah1	ASAH1
asah1b	Asah1	ASAH1
asah2	Asah2	ASAH2
asap1b	Asap1	ASAP1
asap1a	Asap1	ASAP1
asap2a	Asap2	ASAP2
asap2b	Asap2	ASAP2
asap3	Asap3	ASAP3
asb1	Asb1	ASB1
asb10	Asb10	ASB10
asb11	Asb11	ASB11
asb12b	Asb12	ASB12
asb12a	Asb12	ASB12
asb13b	Asb13	ASB13
asb13a.2	Asb13	ASB13
asb13a.1	Asb13	ASB13
asb14b	Asb14	ASB14
asb14a	Asb14	ASB14
asb15a	Asb15	ASB15
asb15b	Asb15	ASB15
asb16	Asb16	ASB16
asb18	Asb18	ASB18
asb2a.1	Asb2	ASB2
asb2b	Asb2	ASB2
asb3	Asb3	ASB3
asb4	Asb4	ASB4
asb5b	Asb5	ASB5
asb5a	Asb5	ASB5
asb6	Asb6	ASB6
asb7	Asb7	ASB7
asb8	Asb8	ASB8
ascc1	Ascc1	ASCC1
ascc2	Ascc2	ASCC2
ascc3	Ascc3	ASCC3
ascl1b	Ascl1	ASCL1
ascl1a	Ascl1	ASCL1
asf1bb	Asf1a	ASF1A
asf1ba	Asf1a	ASF1A
si:ch211-283g2.2	Asgr1	ASGR1
si:ch211-283g2.3	Asgr2	ASGR2
asgrl1	Asgr2	ASGR2
ash1l	Ash1l	ASH1L
ash2l	Ash2l	ASH2L
asic1c	Asic1	ASIC1
asic1a	Asic1	ASIC1
asic1b	Asic1	ASIC1
asic2	Asic2	ASIC2
asic4a	Asic4	ASIC4
asic4b	Asic4	ASIC4
asl	Asl	ASL
asmtl	Asmt	ASMT
asmt	Asmt	ASMT
asmt2	Asmt	ASMT
asns	Asns	ASNS
aspa	Aspa	ASPA
aspdh	Aspdh	ASPDH
si:dkey-74k8.4	Aspg	ASPG
si:dkey-9i23.14	Aspg	ASPG
aspg	Aspg	ASPG
si:ch211-209a2.2	Aspg	ASPG
asph	Asph	ASPH
asphd1	Asphd1	ASPHD1
asphd2	Asphd2	ASPHD2
aspm	Aspm	ASPM
aspn	Aspn	ASPN
aspscr1	Aspscr1	ASPSCR1
zgc:153169	Asrgl1	ASRGL1
asrgl1	Asrgl1	ASRGL1
si:ch211-256m1.8	Asrgl1	ASRGL1
si:dkey-103j14.5	Asrgl1	ASRGL1
ASS1	Ass1	ASS1
aste1a	Aste1	ASTE1
ASTE1	Aste1	ASTE1
c6ast3	Astl	ASTL
c6ast1	Astl	ASTL
he1.1	Astl	ASTL
hce2l1	Astl	ASTL
he1.2	Astl	ASTL
npsn	Astl	ASTL
he1.3	Astl	ASTL
c6ast4	Astl	ASTL
astn1	Astn1	ASTN1
asxl1	Asxl1	ASXL1
asxl2	Asxl2	ASXL2
asz1	Asz1	ASZ1
atad1b	Atad1	ATAD1
atad1a	Atad1	ATAD1
atad2	Atad2	ATAD2
atad2b	Atad2b	ATAD2B
atad3	Atad3a	ATAD3A
atad5a	Atad5	ATAD5
atad5b	Atad5	ATAD5
atat1	Atat1	ATAT1
atcayb	Atcay	ATCAY
atcaya	Atcay	ATCAY
ATE1	Ate1	ATE1
atf1	Atf1	ATF1
atf2	Atf2	ATF2
atf3	Atf3	ATF3
atf4a	Atf4	ATF4
atf4b	Atf4	ATF4
atf5a	Atf5	ATF5
atf5b	Atf5	ATF5
atf6	Atf6	ATF6
atf7b	Atf7	ATF7
atf7a	Atf7	ATF7
atf7ip	Atf7ip	ATF7IP
atf7ip2	Atf7ip2	ATF7IP2
atg10	Atg10	ATG10
atg101	Atg101	ATG101
atg12	Atg12	ATG12
atg13	Atg13	ATG13
atg16l1	Atg16l1	ATG16L1
si:ch1073-143l10.2	Atg16l1	ATG16L1
atg16l2	Atg16l2	ATG16L2
ATG2A	Atg2a	ATG2A
atg2b	Atg2b	ATG2B
atg3	Atg3	ATG3
atg4a	Atg4a	ATG4A
atg4b	Atg4b	ATG4B
atg4c	Atg4c	ATG4C
atg4db	Atg4d	ATG4D
atg4da	Atg4d	ATG4D
atg5	Atg5	ATG5
atg7	Atg7	ATG7
atg9a	Atg9a	ATG9A
atg9b	Atg9b	ATG9B
atic	Atic	ATIC
atl1	Atl1	ATL1
atl2	Atl2	ATL2
atl3	Atl3	ATL3
atm	Atm	ATM
atmin	Atmin	ATMIN
atn1	Atn1	ATN1
atoh1c	Atoh1	ATOH1
atoh1b	Atoh1	ATOH1
atoh1a	Atoh1	ATOH1
atoh7	Atoh7	ATOH7
atoh8	Atoh8	ATOH8
atox1	Atox1	ATOX1
atp10a	Atp10a	ATP10A
atp10b	Atp10b	ATP10B
atp10d	Atp10d	ATP10D
atp11a	Atp11a	ATP11A
ATP11B	Atp11b	ATP11B
atp11c	Atp11c	ATP11C
atp13a1	Atp13a1	ATP13A1
atp13a2	Atp13a2	ATP13A2
atp13a3	Atp13a3	ATP13A3
atp1a1a.4	Atp1a1	ATP1A1
atp1a1a.1	Atp1a1	ATP1A1
atp1a1b	Atp1a1	ATP1A1
atp1a1a.3	Atp1a1	ATP1A1
atp1a1a.5	Atp1a1	ATP1A1
atp1a1a.2	Atp1a1	ATP1A1
atp1a2a	Atp1a2	ATP1A2
atp1a3a	Atp1a3	ATP1A3
atp1a3b	Atp1a3	ATP1A3
atp1b1a	Atp1b1	ATP1B1
atp1b1b	Atp1b1	ATP1B1
atp1b2a	Atp1b2	ATP1B2
atp1b2b	Atp1b2	ATP1B2
atp1b3b	Atp1b3	ATP1B3
atp1b3a	Atp1b3	ATP1B3
atp1b4	Atp1b4	ATP1B4
atp23	Atp23	ATP23
atp2a1	Atp2a1	ATP2A1
atp2a1l	Atp2a1	ATP2A1
atp2a2b	Atp2a2	ATP2A2
atp2a2a	Atp2a2	ATP2A2
si:dkey-28b4.8	Atp2a2	ATP2A2
atp2a3	Atp2a3	ATP2A3
atp2b1b	Atp2b1	ATP2B1
atp2b1a	Atp2b1	ATP2B1
atp2b2	Atp2b2	ATP2B2
atp2b3a	Atp2b3	ATP2B3
atp2b3b	Atp2b3	ATP2B3
atp2b4	Atp2b4	ATP2B4
atp2c1	Atp2c1	ATP2C1
atp5fa1	Atp5a1	ATP5F1A
atp5f1b	Atp5b	ATP5F1B
atp5f1c	Atp5c1	ATP5F1C
atp5f1d	Atp5d	ATP5F1D
atp5f1e	Atp5e	ATP5F1E
atp5mc1	Atp5g1	ATP5MC1
atp5mc3a	Atp5g3	ATP5MC3
atp5mc3b	Atp5g3	ATP5MC3
atp5pd	Atp5h	ATP5PD
atp5pf	Atp5j	ATP5PF
si:ch211-140m22.7	Atp5j	ATP5PF
si:dkey-22n8.3	Atp5j	ATP5PF
si:dkey-21c1.4	Atp5j2	ATP5MF
atp5mf	Atp5j2	ATP5MF
atp5mea	Atp5k	ATP5ME
atp5meb	Atp5k	ATP5ME
atp5l	Atp5l	ATP5MG
atp5md	Atp5md	ATP5MK
zgc:193541	Atp5mpl	ATP5MJ
atp5po	Atp5o	ATP5PO
atp5pb	Atp5pb	ATP5PB
atp6ap1a	Atp6ap1	ATP6AP1
atp6ap1b	Atp6ap1	ATP6AP1
atp6ap1lb	Atp6ap1l	ATP6AP1L
atp6ap1la	Atp6ap1l	ATP6AP1L
atp6ap2	Atp6ap2	ATP6AP2
atp6v0a1a	Atp6v0a1	ATP6V0A1
atp6v0a1b	Atp6v0a1	ATP6V0A1
si:ch73-173p19.2	Atp6v0a1	ATP6V0A1
atp6v0a2a	Atp6v0a2	ATP6V0A2
atp6v0a2b	Atp6v0a2	ATP6V0A2
atp6v0b	Atp6v0b	ATP6V0B
atp6v0cb	Atp6v0c	ATP6V0C
atp6v0ca	Atp6v0c	ATP6V0C
atp6v0d1	Atp6v0d1	ATP6V0D1
atpv0e2	Atp6v0e2	ATP6V0E2
atp6v1ab	Atp6v1a	ATP6V1A
atp6v1aa	Atp6v1a	ATP6V1A
atp6v1b2	Atp6v1b2	ATP6V1B2
atp6v1ba	Atp6v1b2	ATP6V1B2
atp6v1c1a	Atp6v1c1	ATP6V1C1
atp6v1c1b	Atp6v1c1	ATP6V1C1
atp6v1c2	Atp6v1c2	ATP6V1C2
atp6v1d	Atp6v1d	ATP6V1D
atp6v1e1a	Atp6v1e1	ATP6V1E1
atp6v1e1b	Atp6v1e1	ATP6V1E1
atp6v1f	Atp6v1f	ATP6V1F
atp6v1g1	Atp6v1g1	ATP6V1G1
atp6v1h	Atp6v1h	ATP6V1H
atp7a	Atp7a	ATP7A
atp7b	Atp7b	ATP7B
atp8a1	Atp8a1	ATP8A1
ATP8A1	Atp8a1	ATP8A1
atp8a2	Atp8a2	ATP8A2
atp8b1	Atp8b1	ATP8B1
atp8b2	Atp8b2	ATP8B2
atp8b3	Atp8b3	ATP8B3
atp8b4	Atp8b4	ATP8B4
atp8b5a	Atp8b5	ATP8B2
ATP9A	Atp9a	ATP9A
atp9b	Atp9b	ATP9B
atpaf1	Atpaf1	ATPAF1
atpaf2	Atpaf2	ATPAF2
atp5if1b	Atpif1	ATP5IF1
atp5if1a	Atpif1	ATP5IF1
atpsckmt	Atpsckmt	ATPSCKMT
atr	Atr	ATR
atraid	Atraid	ATRAID
atrip	Atrip	ATRIP
atrn	Atrn	ATRN
atrnl1b	Atrnl1	ATRNL1
atrnl1a	Atrnl1	ATRNL1
atrx	Atrx	ATRX
atrxl	Atrx	ATRX
atxn1a	Atxn1	ATXN1
atxn1b	Atxn1	ATXN1
atxn10	Atxn10	ATXN10
atxn1l	Atxn1l	ATXN1L
atxn2	Atxn2	ATXN2
atxn2l	Atxn2l	ATXN2L
atxn3	Atxn3	ATXN3
atxn7	Atxn7	ATXN7
atxn7l1	Atxn7l1	ATXN7L1
atxn7l2b	Atxn7l2	ATXN7L2
atxn7l2a	Atxn7l2	ATXN7L2
atxn7l3	Atxn7l3	ATXN7L3
zgc:175280	AU018091	SLC7A3
si:ch211-193k19.1	AU040320	KIAA0319L
zgc:101569	Auh	AUH
auh	Auh	AUH
aup1	Aup1	AUP1
aurka	Aurka	AURKA
aurkaip1	Aurkaip1	AURKAIP1
aurkb	Aurkb	AURKB
auts2a	Auts2	AUTS2
aven	Aven	AVEN
avil	Avil	AVIL
avl9	Avl9	AVL9
avp	Avp	AVP
si:ch211-197k17.3	Avpi1	AVPI1
si:dkey-178o16.4	Avpr1a	AVPR1A
avpr1ab	Avpr1a	AVPR1A
avpr1aa	Avpr1a	AVPR1A
avpr2ab	Avpr2	AVPR2
avpr2l	Avpr2	AVPR2
avpr2aa	Avpr2	AVPR2
zgc:162344	AW554918	KIAA1328
axdnd1	Axdnd1	AXDND1
axin1	Axin1	AXIN1
axin2	Axin2	AXIN2
AXL	Axl	AXL
azi2	Azi2	AZI2
azin1a	Azin1	AZIN1
azin1b	Azin1	AZIN1
si:ch1073-44g3.1	B230219D22Rik	C5orf24
b2ml	B2m	B2M
zmp:0000001138	B2m	B2M
b2m	B2m	B2M
b3galnt2	B3galnt2	B3GALNT2
b3galt1a	B3galt1	B3GALT1
zgc:162952	B3galt1	B3GALT1
b3galt2	B3galt2	B3GALT2
b3galt4	B3galt4	B3GALT4
si:ch211-250e5.2	B3galt5	B3GALT5
zgc:194330	B3galt5	B3GALT5
zgc:194551	B3galt5	B3GALT5
b3galt6	B3galt6	B3GALT6
b3gat1a	B3gat1	B3GAT1
B3GAT1	B3gat1	B3GAT1
b3gat1b	B3gat1	B3GAT1
b3gat2	B3gat2	B3GAT2
b3gat3	B3gat3	B3GAT3
b3glcta	B3glct	B3GLCT
b3glctb	B3glct	B3GLCT
si:dkey-160o24.3	B3gnt2	B3GNT2
si:dkey-175m17.6	B3gnt2	B3GNT2
b3gnt2a	B3gnt2	B3GNT2
b3gnt2b	B3gnt2	B3GNT2
b3gnt3.1	B3gnt3	B3GNT3
b3gnt3.4	B3gnt3	B3GNT3
b3gnt3.2	B3gnt3	B3GNT3
b3gnt3.3	B3gnt3	B3GNT3
b3gnt5a	B3gnt5	B3GNT5
b3gnt5b	B3gnt5	B3GNT5
b3gnt7l	B3gnt6	B3GNT6
b3gnt7	B3gnt7	B3GNT7
b3gnt2l	B3gnt8	B3GNT8
b3gnt9	B3gnt9	B3GNT9
b3gntl1	B3gntl1	B3GNTL1
b4galnt1a	B4galnt1	B4GALNT1
b4galnt1b	B4galnt1	B4GALNT1
b4galnt2.2	B4galnt2	B4GALNT2
b4galnt2.1	B4galnt2	B4GALNT2
b4galnt3b	B4galnt3	B4GALNT3
b4galnt3a	B4galnt3	B4GALNT3
b4galnt4a	B4galnt4	B4GALNT4
b4galnt4b	B4galnt4	B4GALNT4
b4galt1l	B4galt1	B4GALT1
b4galt1	B4galt1	B4GALT1
si:dkey-199f5.8	B4galt2	B4GALT2
b4galt2	B4galt2	B4GALT2
b4galt3	B4galt3	B4GALT3
b4galt4	B4galt4	B4GALT4
b4galt5	B4galt5	B4GALT5
b4galt6	B4galt6	B4GALT6
b4galt7	B4galt7	B4GALT7
b4gat1	B4gat1	B4GAT1
b9d1	B9d1	B9D1
b9d2	B9d2	B9D2
baalcb	Baalc	BAALC
baalca	Baalc	BAALC
babam1	Babam1	BABAM1
babam2	Babam2	BABAM2
bace1	Bace1	BACE1
bace2	Bace2	BACE2
bach1a	Bach1	BACH1
bach1b	Bach1	BACH1
bach2b	Bach2	BACH2
bach2a	Bach2	BACH2
bada	Bad	BAD
badb	Bad	BAD
bag1	Bag1	BAG1
bag2	Bag2	BAG2
bag3	Bag3	BAG3
bag4	Bag4	BAG4
bag5	Bag5	BAG5
bag6l	Bag6	BAG6
bag6	Bag6	BAG6
bahcc1b	Bahcc1	BAHCC1
bahd1	Bahd1	BAHD1
baiap2b	Baiap2	BAIAP2
baiap2a	Baiap2	BAIAP2
zgc:158689	Baiap2	BAIAP2
baiap2l1a	Baiap2l1	BAIAP2L1
baiap2l1b	Baiap2l1	BAIAP2L1
baiap2l2a	Baiap2l2	BAIAP2L2
baiap2l2b	Baiap2l2	BAIAP2L2
baiap3	Baiap3	BAIAP3
bambib	Bambi	BAMBI
bambia	Bambi	BAMBI
si:dkey-211g8.4	Banf1	BANF1
banf1	Banf1	BANF1
banp	Banp	BANP
bap1	Bap1	BAP1
bard1	Bard1	BARD1
barhl1a	Barhl1	BARHL1
barhl1b	Barhl1	BARHL1
barhl2	Barhl2	BARHL2
barx1	Barx1	BARX1
barx2	Barx2	BARX2
basp1	Basp1	BASP1
batf	Batf	BATF
si:dkey-23i12.7	Batf2	BATF2
batf3	Batf3	BATF3
baxa	Bax	BAX
zgc:153993	Bax	BAX
baxb	Bax	BAX
baz1a	Baz1a	BAZ1A
baz1b	Baz1b	BAZ1B
baz2a	Baz2a	BAZ2A
baz2ba	Baz2b	BAZ2B
bbc3	Bbc3	BBC3
bbip1	Bbip1	BBIP1
si:ch211-243o19.4	Bbof1	BBOF1
si:ch211-163l21.10	Bbof1	BBOF1
bbox1	Bbox1	BBOX1
bbs1	Bbs1	BBS1
bbs10	Bbs10	BBS10
bbs12	Bbs12	BBS12
bbs2	Bbs2	BBS2
bbs4	Bbs4	BBS4
bbs5	Bbs5	BBS5
bbs7	Bbs7	BBS7
bbs9	Bbs9	BBS9
bbx	Bbx	BBX
si:ch211-231f6.6	BC003965	C16orf91
zgc:162255	BC004004	C6orf89
znf1136	BC024063	ZNF808
zgc:112977	BC025920	ZNF77
si:ch211-239j9.1	BC029722	MMP24OS
si:dkey-121a11.3	BC034090	KIAA1614
si:ch211-13f8.1	BC034090	KIAA1614
si:dkey-8l13.5	BC051019	C11orf16
zgc:103438	BC051665	CTSL
si:dkey-26g8.5	BC051665	CTSL
bcam	Bcam	BCAM
bcan	Bcan	BCAN
bcap29	Bcap29	BCAP29
bcap31	Bcap31	BCAP31
bcar1	Bcar1	BCAR1
bcar3	Bcar3	BCAR3
bcas2	Bcas2	BCAS2
bcas3	Bcas3	BCAS3
bcat1	Bcat1	BCAT1
bcat2	Bcat2	BCAT2
bccip	Bccip	BCCIP
bcdin3d	Bcdin3d	BCDIN3D
bckdha	Bckdha	BCKDHA
bckdhb	Bckdhb	BCKDHB
bckdk	Bckdk	BCKDK
bcl10	Bcl10	BCL10
bcl11ab	Bcl11a	BCL11A
bcl11aa	Bcl11a	BCL11A
bcl11ba	Bcl11b	BCL11B
im:7142702	Bcl11b	BCL11B
bcl2b	Bcl2	BCL2
bcl2a	Bcl2	BCL2
bcl2l1	Bcl2l1	BCL2L1
bcl2l10	Bcl2l10	BCL2L10
bcl2l11	Bcl2l11	BCL2L11
si:ch73-248e21.1	Bcl2l12	BCL2L12
bcl2l13	Bcl2l13	BCL2L13
si:ch211-214j24.14	Bcl2l13	BCL2L13
bcl3	Bcl3	BCL3
bcl6aa	Bcl6	BCL6
bcl6ab	Bcl6b	BCL6B
bcl6b	Bcl6b	BCL6B
bcl7a	Bcl7a	BCL7A
bcl7bb	Bcl7b	BCL7B
bcl7ba	Bcl7b	BCL7B
bcl9	Bcl9	BCL9
bcl9l	Bcl9l	BCL9L
zgc:112982	Bclaf3	BCLAF3
bco1l	Bco1	BCO1
bco1	Bco1	BCO1
bco2b	Bco2	BCO2
bco2l	Bco2	BCO2
bco2a	Bco2	BCO2
bcor	Bcor	BCOR
bcorl1	Bcorl1	BCORL1
bcr	Bcr	BCR
BCR	Bcr	BCR
bcs1l	Bcs1l	BCS1L
bdh1	Bdh1	BDH1
zgc:113142	Bdh1	BDH1
bdh2	Bdh2	BDH2
bdkrb1	Bdkrb1	BDKRB1
BDKRB2	Bdkrb2	BDKRB2
bdnf	Bdnf	BDNF
zgc:162472	Bdp1	BDP1
bean1	Bean1	BEAN1
becn1	Becn1	BECN1
si:ch211-276i12.4	Begain	BEGAIN
si:dkey-174m14.3	Begain	BEGAIN
bend3	Bend3	BEND3
BEND4	Bend4	BEND4
bend5	Bend5	BEND5
si:ch211-194k22.8	Bend6	BEND6
best1	Best1	BEST1
best4	Best1	BEST1
best2	Best2	BEST2
bet1	Bet1	BET1
bet1l	Bet1l	BET1L
BFSP1	Bfsp1	BFSP1
bfsp2	Bfsp2	BFSP2
bglap	Bglap2	BGLAP
bglapl	Bglap2	BGLAP
bgnb	Bgn	BGN
bgna	Bgn	BGN
bhlha15	Bhlha15	BHLHA15
bhlha9	Bhlha9	BHLHA9
si:ch211-196c10.13	Bhlhe22	BHLHE22
bhlhe22	Bhlhe22	BHLHE22
bhlhe23	Bhlhe23	BHLHE23
bhlhe40	Bhlhe40	BHLHE40
bhlhe41	Bhlhe41	BHLHE41
bhmt	Bhmt	BHMT
bicc1b	Bicc1	BICC1
bicc2	Bicc1	BICC1
bicc1a	Bicc1	BICC1
bicd1a	Bicd1	BICD1
BICD2	Bicd2	BICD2
bicd2	Bicd2	BICD2
zgc:162200	Bicd2	BICD2
bicdl1	Bicdl1	BICDL1
bicdl2l	Bicdl1	BICDL1
bicdl2	Bicdl2	BICDL2
si:ch211-235m3.5	Bicdl2	BICDL2
zgc:174698	Bicra	BICRA
si:ch211-168d23.3	Bicra	BICRA
bicra	Bicra	BICRA
bicral	Bicral	BICRAL
bida	Bid	BID
bik	Bik	BIK
bin1b	Bin1	BIN1
bin2b	Bin2	BIN2
bin2a	Bin2	BIN2
bin3	Bin3	BIN3
birc2	Birc2	BIRC2
birc5b	Birc5	BIRC5
birc5a	Birc5	BIRC5
birc6	Birc6	BIRC6
birc7	Birc7	BIRC7
bivm	Bivm	BIVM
blcap	Blcap	BLCAP
blk	Blk	BLK
blm	Blm	BLM
blmh	Blmh	BLMH
si:dkeyp-117b11.1	Blnk	BLNK
blnk	Blnk	BLNK
bloc1s1	Bloc1s1	BLOC1S1
bloc1s2	Bloc1s2	BLOC1S2
bloc1s3	Bloc1s3	BLOC1S3
bloc1s4	Bloc1s4	BLOC1S4
bloc1s5	Bloc1s5	BLOC1S5
bloc1s6	Bloc1s6	BLOC1S6
blvra	Blvra	BLVRA
blvrb	Blvrb	BLVRB
blzf1	Blzf1	BLZF1
zgc:171844	Bmerb1	BMERB1
bmf1	Bmf	BMF
bmf2	Bmf	BMF
bmi1b	Bmi1	BMI1
bmi1a	Bmi1	BMI1
bmp1b	Bmp1	BMP1
bmp1a	Bmp1	BMP1
bmp10l	Bmp10	BMP10
bmp10	Bmp10	BMP10
bmp15	Bmp15	BMP15
bmp2b	Bmp2	BMP2
bmp2a	Bmp2	BMP2
bmp2k	Bmp2k	BMP2K
bmp3	Bmp3	BMP3
bmp16	Bmp4	BMP4
bmp4	Bmp4	BMP4
bmp5	Bmp5	BMP5
bmp6	Bmp6	BMP6
bmp7b	Bmp7	BMP7
bmp7a	Bmp7	BMP7
bmp8a	Bmp8a	BMP8A
bmper	Bmper	BMPER
bmpr1aa	Bmpr1a	BMPR1A
bmpr1ab	Bmpr1a	BMPR1A
bmpr1bb	Bmpr1b	BMPR1B
bmpr1ba	Bmpr1b	BMPR1B
bmpr2b	Bmpr2	BMPR2
bmpr2a	Bmpr2	BMPR2
bms1	Bms1	BMS1
bmt2	Bmt2	BMT2
mycn	Bmyc	MYC
BNC1	Bnc1	BNC1
bnc2	Bnc2	BNC2
bnip1b	Bnip1	BNIP1
bnip1a	Bnip1	BNIP1
bnip2	Bnip2	BNIP2
bnip3	Bnip3	BNIP3
bnip4	Bnip3	BNIP3
zgc:73226	Bnip3	BNIP3
bnip3lb	Bnip3l	BNIP3L
bnip3la	Bnip3l	BNIP3L
bnipl	Bnipl	BNIPL
boc	Boc	BOC
bod1	Bod1	BOD1
bod1l1	Bod1l	BOD1L1
bcl2l16	Bok	BOK
boka	Bok	BOK
bokb	Bok	BOK
bola1	Bola1	BOLA1
bola3	Bola3	BOLA3
bop1	Bop1	BOP1
bora	Bora	BORA
borcs5	Borcs5	BORCS5
si:dkey-72l14.4	Borcs6	BORCS6
borcs7	Borcs7	BORCS7
borcs8	Borcs8	BORCS8
bpgm	Bpgm	BPGM
bphl	Bphl	BPHL
bpifcl	Bpi	BPI
cetp	Bpifb3	BPIFB3
bpnt1	Bpnt1	BPNT1
impad1	Bpnt2
bptf	Bptf	BPTF
braf	Braf	BRAF
brap	Brap	BRAP
brat1	Brat1	BRAT1
brca2	Brca2	BRCA2
brcc3	Brcc3	BRCC3
brd1a	Brd1	BRD1
brd1b	Brd1	BRD1
brd2b	Brd2	BRD2
brd2a	Brd2	BRD2
brd3a	Brd3	BRD3
brd3b	Brd3	BRD3
brd4	Brd4	BRD4
brd7	Brd7	BRD7
brd8	Brd8	BRD8
BRD8	Brd8	BRD8
brd9	Brd9	BRD9
brdt	Brdt	BRDT
brf1a	Brf1	BRF1
brf1b	Brf1	BRF1
brf2	Brf2	BRF2
bri3	Bri3	BRI3
bri3bp	Bri3bp	BRI3BP
bricd5	Bricd5	BRICD5
brinp1	Brinp1	BRINP1
si:dkey-19a16.1	Brinp2	BRINP2
brinp2	Brinp2	BRINP2
brinp3a.1	Brinp2	BRINP2
brinp3b	Brinp2	BRINP2
brinp3a.2	Brinp3	BRINP3
brip1	Brip1	BRIP1
bxdc2	Brix1	BRIX1
brk1	Brk1	BRK1
brms1	Brms1	BRMS1
brms1la	Brms1l	BRMS1L
brms1lb	Brms1l	BRMS1L
brox	Brox	BROX
brpf1	Brpf1	BRPF1
brpf3a	Brpf3	BRPF3
brpf3b	Brpf3	BRPF3
si:dkey-16p21.7	Brsk1	BRSK1
si:ch211-255p10.4	Brsk1	BRSK1
brsk2b	Brsk2	BRSK2
brwd1	Brwd1	BRWD1
brwd3	Brwd3	BRWD3
bscl2l	Bscl2	BSCL2
bscl2	Bscl2	BSCL2
bsdc1	Bsdc1	BSDC1
bsg	Bsg	BSG
bsnb	Bsn	BSN
BSN	Bsn	BSN
bsnd	Bsnd	BSND
bspry	Bspry	BSPRY
bsx	Bsx	BSX
btaf1	Btaf1	BTAF1
btbd10a	Btbd10	BTBD10
btbd10b	Btbd10	BTBD10
btbd11b	Btbd11	BTBD11
btbd11a	Btbd11	BTBD11
[truncated: 18,595 more rows]

## Sheet: Atlantic cod to mammals
At.cod gene	Mouse gene	Human gene
ENSGMOG00000011495	0610009B22Rik	TRAPPC2
ENSGMOG00000002944	0610010K14Rik	C17orf49
ENSGMOG00000030915	0610012G03Rik	NCBP2AS2
ENSGMOG00000030971	0610012G03Rik	NCBP2AS2
ENSGMOG00000017308	0610030E20Rik	C2orf68
ENSGMOG00000030284	1110002E22Rik	C4orf54
ENSGMOG00000026945	1110002E22Rik	C4orf54
ENSGMOG00000004363	1110004F10Rik	C11orf58
ENSGMOG00000016791	1110038F14Rik	C8orf33
ENSGMOG00000024885	1110059E24Rik	C9orf85
ENSGMOG00000000096	1110059G10Rik	KIAA1143
ENSGMOG00000020253	1600012H06Rik	C6orf120
ENSGMOG00000022844	1600014C10Rik	C19orf12
ENSGMOG00000005245	1600014C10Rik	C19orf12
ENSGMOG00000014313	1700009N14Rik	RAN
ENSGMOG00000030905	1700017N19Rik	C12orf50
ENSGMOG00000029042	1700024G13Rik	C10orf53
ENSGMOG00000026334	1700028K03Rik	C1orf146
ENSGMOG00000017715	1700029J07Rik	C4orf47
ENSGMOG00000037140	1700030K09Rik	C19orf44
ENSGMOG00000026346	1700037H04Rik	C20orf27
ENSGMOG00000036651	1700037H04Rik	C20orf27
ENSGMOG00000011317	1700066M21Rik	C2orf69
ENSGMOG00000036649	1700109H08Rik	EFCAB1
ENSGMOG00000016888	1700109H08Rik	EFCAB1
ENSGMOG00000024390	1700109H08Rik	EFCAB1
ENSGMOG00000027766	1700109H08Rik	EFCAB1
ENSGMOG00000002535	1700109H08Rik	EFCAB1
ENSGMOG00000018859	1700109H08Rik	EFCAB1
ENSGMOG00000014857	1700123O20Rik	C14orf119
ENSGMOG00000025545	1810009A15Rik	C11orf98
ENSGMOG00000008018	1810013L24Rik	C16orf72
ENSGMOG00000026129	1810020O05Rik	CFAP92
ENSGMOG00000016866	1810030O07Rik	CXorf38
ENSGMOG00000034980	1810030O07Rik	CXorf38
ENSGMOG00000026830	1810055G02Rik	C11orf24
ENSGMOG00000036737	2210010C04Rik	PRSS1
ENSGMOG00000003902	2210010C04Rik	PRSS1
ENSGMOG00000010172	2210016F16Rik	C9orf64
ENSGMOG00000035289	2210016L21Rik	C12orf43
ENSGMOG00000000816	2210408I21Rik	KIAA0825
ENSGMOG00000008367	2300009A05Rik	C15orf61
ENSGMOG00000024198	2310022A10Rik	C19orf47
ENSGMOG00000015490	2310022B05Rik	C1orf198
ENSGMOG00000031619	2310033P09Rik	C1orf35
ENSGMOG00000006172	2310057J18Rik	C6orf58
ENSGMOG00000011658	2310057M21Rik	C10orf88
ENSGMOG00000013308	2310061I04Rik	C6orf136
ENSGMOG00000033379	2410002F23Rik	C19orf48
ENSGMOG00000024625	2410002F23Rik	C19orf48
ENSGMOG00000029142	2410002F23Rik	C19orf48
ENSGMOG00000030250	2410002F23Rik	C19orf48
ENSGMOG00000013456	2410002F23Rik	C19orf48
ENSGMOG00000024517	2410002F23Rik	C19orf48
ENSGMOG00000008167	2410002F23Rik	C19orf48
ENSGMOG00000036661	2410002F23Rik	C19orf48
ENSGMOG00000035671	2410002F23Rik	C19orf48
ENSGMOG00000034751	2410002F23Rik	C19orf48
ENSGMOG00000034908	2410002F23Rik	C19orf48
ENSGMOG00000030917	2410002F23Rik	C19orf48
ENSGMOG00000024350	2410002F23Rik	C19orf48
ENSGMOG00000033738	2410002F23Rik	C19orf48
ENSGMOG00000029043	2410004B18Rik	C1orf52
ENSGMOG00000011540	2510002D24Rik	C22orf39
ENSGMOG00000031477	2510009E07Rik	C3orf70
ENSGMOG00000024663	2510009E07Rik	C3orf70
ENSGMOG00000003278	2510039O18Rik	KIAA2013
ENSGMOG00000036736	2810004N23Rik	C1orf131
ENSGMOG00000016774	3110082I17Rik	C7orf50
ENSGMOG00000025627	3425401B19Rik	C10orf71
ENSGMOG00000016909	4833420G17Rik	C5orf34
ENSGMOG00000027205	4833439L19Rik	KIAA1191
ENSGMOG00000009385	4833439L19Rik	KIAA1191
ENSGMOG00000002703	4921524J17Rik	C16orf87
ENSGMOG00000010362	4930430F08Rik	C12orf29
ENSGMOG00000034396	4930453N24Rik	C3orf38
ENSGMOG00000000570	4930453N24Rik	C3orf38
ENSGMOG00000031973	4930523C07Rik	KIAA0040
ENSGMOG00000004390	4930562C15Rik	C16orf96
ENSGMOG00000011329	4930562C15Rik	C16orf96
ENSGMOG00000012239	4930562C15Rik	C16orf96
ENSGMOG00000010293	4930562C15Rik	C16orf96
ENSGMOG00000037257	4930595M18Rik	SRSF2
ENSGMOG00000010771	4931406C07Rik	C11orf54
ENSGMOG00000007886	4931428F04Rik	KIAA0895L
ENSGMOG00000013966	4932438H23Rik	C21orf62
ENSGMOG00000024385	4933403O08Rik	CNKSR1
ENSGMOG00000006163	4933403O08Rik	CNKSR1
ENSGMOG00000018863	4933403O08Rik	CNKSR1
ENSGMOG00000010506	4933427D14Rik	KIAA0753
ENSGMOG00000010839	4933434E20Rik	C1orf43
ENSGMOG00000007932	4933434E20Rik	C1orf43
ENSGMOG00000000999	5031439G07Rik	KIAA0930
ENSGMOG00000014572	5730455P16Rik	C17orf75
ENSGMOG00000016725	6030458C11Rik	C5orf22
ENSGMOG00000002337	6430548M08Rik	KIAA0513
ENSGMOG00000005597	6430550D23Rik	C20orf173
ENSGMOG00000017628	6430550D23Rik	C20orf173
ENSGMOG00000030416	6430550D23Rik	C20orf173
ENSGMOG00000002221	6430550D23Rik	C20orf173
ENSGMOG00000026694	6430550D23Rik	C20orf173
ENSGMOG00000016182	6430571L13Rik	C3orf18
ENSGMOG00000028549	8030462N17Rik	C18orf25
ENSGMOG00000009500	9130401M01Rik	C8orf76
ENSGMOG00000009503	9530068E07Rik	C5orf15
ENSGMOG00000023946	9530077C05Rik	KIAA0895
ENSGMOG00000009561	9930104L06Rik	C1orf109
ENSGMOG00000030765	A130010J15Rik	C1orf74
ENSGMOG00000018943	A1cf	A1CF
ENSGMOG00000031427	A2m	A2M
ENSGMOG00000030985	A2m	A2M
ENSGMOG00000023525	A2m	A2M
ENSGMOG00000028563	A2m	A2M
ENSGMOG00000024893	A3galt2	A3GALT2
ENSGMOG00000024214	A3galt2	A3GALT2
ENSGMOG00000016953	A830018L16Rik	C8orf34
ENSGMOG00000033479	A930007A09Rik	TMEM238
ENSGMOG00000024983	A930017K11Rik	PRR35
ENSGMOG00000035233	AA986860	C1orf116
ENSGMOG00000028479	AA986860	C1orf116
ENSGMOG00000009746	Aaas	AAAS
ENSGMOG00000035494	Aadac	AADAC
ENSGMOG00000005784	Aadat	AADAT
ENSGMOG00000008365	Aagab	AAGAB
ENSGMOG00000010051	Aak1	AAK1
ENSGMOG00000016074	Aamp	AAMP
ENSGMOG00000004277	Aanat	AANAT
ENSGMOG00000010804	Aanat	AANAT
ENSGMOG00000015584	Aar2	AAR2
ENSGMOG00000008147	Aars	AARS1
ENSGMOG00000000274	Aars2	AARS2
ENSGMOG00000013229	Aarsd1	AARSD1
ENSGMOG00000018953	Aasdh	AASDH
ENSGMOG00000029202	Aasdhppt	AASDHPPT
ENSGMOG00000010875	Aass	AASS
ENSGMOG00000022349	Aatf	AATF
ENSGMOG00000036353	Aatk	AATK
ENSGMOG00000022675	Aatk	AATK
ENSGMOG00000009231	Abat	ABAT
ENSGMOG00000011477	Abca1	ABCA1
ENSGMOG00000004829	Abca1	ABCA1
ENSGMOG00000012822	Abca12	ABCA12
ENSGMOG00000006404	Abca2	ABCA2
ENSGMOG00000004678	Abca3	ABCA3
ENSGMOG00000019107	Abca4	ABCA4
ENSGMOG00000012417	Abca4	ABCA4
ENSGMOG00000012077	Abca5	ABCA5
ENSGMOG00000001242	Abca7	ABCA7
ENSGMOG00000012455	Abcb10	ABCB10
ENSGMOG00000010088	Abcb11	ABCB11
ENSGMOG00000015175	Abcb4	ABCB4
ENSGMOG00000004283	Abcb6	ABCB6
ENSGMOG00000005895	Abcb7	ABCB7
ENSGMOG00000003158	Abcb8	ABCB8
ENSGMOG00000014194	Abcb9	ABCB9
ENSGMOG00000018157	Abcc10	ABCC10
ENSGMOG00000007063	Abcc10	ABCC10
ENSGMOG00000005748	Abcc10	ABCC10
ENSGMOG00000010612	Abcc12	ABCC12
ENSGMOG00000029209	Abcc4	ABCC4
ENSGMOG00000030719	Abcc4	ABCC4
ENSGMOG00000024450	Abcc4	ABCC4
ENSGMOG00000001948	Abcc4	ABCC4
ENSGMOG00000008707	Abcc4	ABCC4
ENSGMOG00000004921	Abcc8	ABCC8
ENSGMOG00000001244	Abcc9	ABCC9
ENSGMOG00000017928	Abcd2	ABCD2
ENSGMOG00000015172	Abcd3	ABCD3
ENSGMOG00000010957	Abcd4	ABCD4
ENSGMOG00000004035	Abce1	ABCE1
ENSGMOG00000007471	Abce1	ABCE1
ENSGMOG00000013281	Abcf1	ABCF1
ENSGMOG00000006259	Abcf2	ABCF2
ENSGMOG00000002444	Abcf3	ABCF3
ENSGMOG00000016241	Abcg2	ABCG2
ENSGMOG00000009820	Abcg2	ABCG2
ENSGMOG00000007752	Abcg2	ABCG2
ENSGMOG00000005411	Abcg4	ABCG4
ENSGMOG00000033407	Abcg4	ABCG4
ENSGMOG00000008333	Abcg5	ABCG5
ENSGMOG00000008335	Abcg8	ABCG8
ENSGMOG00000007103	Abhd1	ABHD1
ENSGMOG00000014986	Abhd10	ABHD10
ENSGMOG00000007094	Abhd11	ABHD11
ENSGMOG00000004423	Abhd12	ABHD12
ENSGMOG00000031760	Abhd12b	ABHD12B
ENSGMOG00000001208	Abhd12b	ABHD12B
ENSGMOG00000020407	Abhd13	ABHD13
ENSGMOG00000009609	Abhd14a	ABHD14A
ENSGMOG00000016131	Abhd14b	ABHD14B
ENSGMOG00000014851	Abhd16a	ABHD16A
ENSGMOG00000035471	Abhd17a	ABHD17A
ENSGMOG00000027064	Abhd17a	ABHD17A
ENSGMOG00000025921	Abhd17b	ABHD17B
ENSGMOG00000027250	Abhd17c	ABHD17C
ENSGMOG00000028021	Abhd18	ABHD18
ENSGMOG00000015170	Abhd2	ABHD2
ENSGMOG00000019225	Abhd2	ABHD2
ENSGMOG00000011397	Abhd3	ABHD3
ENSGMOG00000005163	Abhd4	ABHD4
ENSGMOG00000014789	Abhd5	ABHD5
ENSGMOG00000014242	Abhd5	ABHD5
ENSGMOG00000010616	Abhd6	ABHD6
ENSGMOG00000018127	Abhd6	ABHD6
ENSGMOG00000016960	Abhd8	ABHD8
ENSGMOG00000035550	Abhd8	ABHD8
ENSGMOG00000032596	Abi1	ABI1
ENSGMOG00000011774	Abi1	ABI1
ENSGMOG00000028127	Abi1	ABI1
ENSGMOG00000029004	Abi2	ABI2
ENSGMOG00000029165	Abi3	ABI3
ENSGMOG00000016610	Abi3bp	ABI3BP
ENSGMOG00000014799	Abi3bp	ABI3BP
ENSGMOG00000017026	Abitram	ABITRAM
ENSGMOG00000011771	Abl1	ABL1
ENSGMOG00000027447	Abl2	ABL2
ENSGMOG00000014234	Abl2	ABL2
ENSGMOG00000027465	Ablim1	ABLIM1
ENSGMOG00000008829	Ablim1	ABLIM1
ENSGMOG00000009526	Ablim2	ABLIM2
ENSGMOG00000011042	Ablim3	ABLIM3
ENSGMOG00000001852	Ablim3	ABLIM3
ENSGMOG00000010744	Abr	ABR
ENSGMOG00000025032	Abra	ABRA
ENSGMOG00000033946	Abracl	ABRACL
ENSGMOG00000000023	Abraxas1	ABRAXAS1
ENSGMOG00000018286	Abraxas2	ABRAXAS2
ENSGMOG00000007167	Abt1	ABT1
ENSGMOG00000004364	Abtb2	ABTB2
ENSGMOG00000001091	Abtb2	ABTB2
ENSGMOG00000010850	Acaa1b	ACAA1
ENSGMOG00000011548	Acaa2	ACAA2
ENSGMOG00000001741	Acaca	ACACA
ENSGMOG00000012032	Acacb	ACACB
ENSGMOG00000010092	Acad11	ACAD11
ENSGMOG00000010419	Acad8	ACAD8
ENSGMOG00000005083	Acad9	ACAD9
ENSGMOG00000012568	Acadl	ACADL
ENSGMOG00000031509	Acadl	ACADL
ENSGMOG00000002386	Acadm	ACADM
ENSGMOG00000007282	Acads	ACADS
ENSGMOG00000019024	Acadsb	ACADSB
ENSGMOG00000014084	Acadvl	ACADVL
ENSGMOG00000019249	Acan	ACAN
ENSGMOG00000025583	Acan	ACAN
ENSGMOG00000016844	Acap1	ACAP1
ENSGMOG00000005909	Acap2	ACAP2
ENSGMOG00000006685	Acap3	ACAP3
ENSGMOG00000019391	Acap3	ACAP3
ENSGMOG00000014560	Acat1	ACAT1
ENSGMOG00000001630	Acat2	ACAT2
ENSGMOG00000015077	Acbd3	ACBD3
ENSGMOG00000000622	Acbd4	ACBD4
ENSGMOG00000011751	Acbd5	ACBD5
ENSGMOG00000018098	Acbd5	ACBD5
ENSGMOG00000013721	Acbd6	ACBD6
ENSGMOG00000024108	Acbd7	ACBD7
ENSGMOG00000003409	Accs	ACCS
ENSGMOG00000008237	Ace2	ACE2
ENSGMOG00000013301	Ace3	ACE2
ENSGMOG00000011043	Acer1	ACER1
ENSGMOG00000012497	Acer2	ACER2
ENSGMOG00000007373	Acer3	ACER3
ENSGMOG00000013350	Ache	ACHE
ENSGMOG00000025886	Acin1	ACIN1
ENSGMOG00000029768	Acin1	ACIN1
ENSGMOG00000019953	Ackr3	ACKR3
ENSGMOG00000028480	Ackr3	ACKR3
ENSGMOG00000027155	Ackr4	ACKR4
ENSGMOG00000026042	Ackr4	ACKR4
ENSGMOG00000000077	Acly	ACLY
ENSGMOG00000000755	Acly	ACLY
ENSGMOG00000000573	Acmsd	ACMSD
ENSGMOG00000005514	Aco1	ACO1
ENSGMOG00000001946	Aco2	ACO2
ENSGMOG00000013297	Aco2	ACO2
ENSGMOG00000035641	Acod1	ACOD1
ENSGMOG00000018437	Acot11	ACOT11
ENSGMOG00000007436	Acot11	ACOT11
ENSGMOG00000008490	Acot13	ACOT13
ENSGMOG00000014109	Acot2	ACOT2
ENSGMOG00000035897	Acot2	ACOT2
ENSGMOG00000015346	Acot7	ACOT7
ENSGMOG00000014564	Acot8	ACOT8
ENSGMOG00000004381	Acot9	ACOT9
ENSGMOG00000017643	Acox1	ACOX1
ENSGMOG00000017847	Acox3	ACOX3
ENSGMOG00000012828	Acp2	ACP2
ENSGMOG00000025866	Acp4	ACP4
ENSGMOG00000008932	Acp5	ACP5
ENSGMOG00000004045	Acp6	ACP6
ENSGMOG00000016025	Acp7	ACP7
ENSGMOG00000011004	Acsbg2	ACSBG2
ENSGMOG00000007674	Acsf2	ACSF2
ENSGMOG00000011605	Acsf2	ACSF2
ENSGMOG00000001508	Acsf3	ACSF3
ENSGMOG00000009456	Acsl1	ACSL1
ENSGMOG00000002152	Acsl1	ACSL1
ENSGMOG00000006180	Acsl3	ACSL3
ENSGMOG00000003130	Acsl4	ACSL4
ENSGMOG00000018683	Acsl5	ACSL5
ENSGMOG00000008131	Acsl6	ACSL6
ENSGMOG00000005626	Acsl6	ACSL6
ENSGMOG00000016076	Acsl6	ACSL6
ENSGMOG00000016102	Acsl6	ACSL6
ENSGMOG00000004720	Acsl6	ACSL6
ENSGMOG00000012345	Acsm2	ACSM2B
ENSGMOG00000011902	Acsm3	ACSM3
ENSGMOG00000017472	Acss1	ACSS1
ENSGMOG00000002057	Acss2	ACSS2
ENSGMOG00000015350	Acss3	ACSS3
ENSGMOG00000001421	Acta1	ACTA1
ENSGMOG00000028074	Acta1	ACTA1
ENSGMOG00000035136	Actc1	ACTC1
ENSGMOG00000009683	Actg1	ACTG1
ENSGMOG00000023192	Actg1	ACTG1
ENSGMOG00000017298	Actl6a	ACTL6A
ENSGMOG00000013597	Actn1	ACTN1
ENSGMOG00000018933	Actn2	ACTN2
ENSGMOG00000011860	Actr10	ACTR10
ENSGMOG00000017491	Actr1a	ACTR1A
ENSGMOG00000010030	Actr2	ACTR2
ENSGMOG00000002043	Actr3	ACTR3
ENSGMOG00000007121	Actr3	ACTR3
ENSGMOG00000002876	Actr3b	ACTR3B
ENSGMOG00000003553	Actr5	ACTR5
ENSGMOG00000003691	Actr6	ACTR6
ENSGMOG00000014098	Actr8	ACTR8
ENSGMOG00000025363	Acvr1b	ACVR1B
ENSGMOG00000019193	Acvr1c	ACVR1C
ENSGMOG00000005513	Acvr2a	ACVR2A
ENSGMOG00000036028	Acvr2a	ACVR2A
ENSGMOG00000009424	Acvr2b	ACVR2B
ENSGMOG00000012405	Acvr2b	ACVR2B
ENSGMOG00000004447	Acvrl1	ACVRL1
ENSGMOG00000000177	Acvrl1	ACVRL1
ENSGMOG00000019186	Acvrl1	ACVRL1
ENSGMOG00000009594	Acy1	ACY1
ENSGMOG00000007281	Acy3	ACY3
ENSGMOG00000024862	Acyp1	ACYP1
ENSGMOG00000022753	Acyp2	ACYP2
ENSGMOG00000011406	Ada	ADA
ENSGMOG00000002821	Adad1	ADAD1
ENSGMOG00000010698	Adad2	ADAD2
ENSGMOG00000002755	Adal	ADAL
ENSGMOG00000000103	Adam11	ADAM11
ENSGMOG00000006374	Adam11	ADAM11
ENSGMOG00000034474	Adam11	ADAM11
ENSGMOG00000009161	Adam12	ADAM12
ENSGMOG00000002539	Adam12	ADAM12
ENSGMOG00000017904	Adam15	ADAM15
ENSGMOG00000011183	Adam17	ADAM17
ENSGMOG00000003189	Adam17	ADAM17
ENSGMOG00000000440	Adam19	ADAM19
ENSGMOG00000015530	Adam21	ADAM21
ENSGMOG00000004289	Adam21	ADAM21
ENSGMOG00000008643	Adam21	ADAM21
ENSGMOG00000003548	Adam21	ADAM21
ENSGMOG00000008042	Adam22	ADAM22
ENSGMOG00000004307	Adam28	ADAM28
ENSGMOG00000034909	Adam8	ADAM8
ENSGMOG00000015345	Adam8	ADAM8
ENSGMOG00000003064	Adam8	ADAM8
ENSGMOG00000011997	Adam9	ADAM9
ENSGMOG00000003119	Adamts1	ADAMTS1
ENSGMOG00000011062	Adamts10	ADAMTS10
ENSGMOG00000007338	Adamts12	ADAMTS12
ENSGMOG00000006574	Adamts13	ADAMTS13
ENSGMOG00000000309	Adamts14	ADAMTS14
ENSGMOG00000005622	Adamts15	ADAMTS15
ENSGMOG00000005407	Adamts16	ADAMTS16
ENSGMOG00000010476	Adamts17	ADAMTS17
ENSGMOG00000005299	Adamts18	ADAMTS18
ENSGMOG00000036080	Adamts2	ADAMTS2
ENSGMOG00000008040	Adamts2	ADAMTS2
ENSGMOG00000009121	Adamts20	ADAMTS20
ENSGMOG00000014174	Adamts3	ADAMTS3
ENSGMOG00000003076	Adamts5	ADAMTS5
ENSGMOG00000018645	Adamts6	ADAMTS6
ENSGMOG00000015813	Adamts7	ADAMTS7
ENSGMOG00000011399	Adamts8	ADAMTS8
ENSGMOG00000009226	Adamts9	ADAMTS9
ENSGMOG00000023858	Adamtsl1	ADAMTSL1
ENSGMOG00000009186	Adamtsl2	ADAMTSL2
ENSGMOG00000018346	Adamtsl3	ADAMTSL3
ENSGMOG00000010939	Adap1	ADAP1
ENSGMOG00000001481	Adap1	ADAP1
ENSGMOG00000011930	Adap2	ADAP2
ENSGMOG00000019052	Adar	ADAR
ENSGMOG00000002964	Adarb1	ADARB1
ENSGMOG00000005924	Adarb1	ADARB1
ENSGMOG00000030877	Adarb2	ADARB2
ENSGMOG00000017835	Adarb2	ADARB2
ENSGMOG00000025019	Adat1	ADAT1
ENSGMOG00000004244	Adat2	ADAT2
ENSGMOG00000009155	Adck1	ADCK1
ENSGMOG00000004822	Adck2	ADCK2
ENSGMOG00000000772	Adck5	ADCK5
ENSGMOG00000018341	Adcy1	ADCY1
ENSGMOG00000016776	Adcy1	ADCY1
ENSGMOG00000013531	Adcy2	ADCY2
ENSGMOG00000004768	Adcy2	ADCY2
ENSGMOG00000001506	Adcy3	ADCY3
ENSGMOG00000014013	Adcy3	ADCY3
ENSGMOG00000004421	Adcy4	ADCY4
ENSGMOG00000014058	Adcy5	ADCY5
ENSGMOG00000009612	Adcy6	ADCY6
ENSGMOG00000008289	Adcy6	ADCY6
ENSGMOG00000006186	Adcy7	ADCY7
ENSGMOG00000025436	Adcy8	ADCY8
ENSGMOG00000014968	Adcy9	ADCY9
ENSGMOG00000015149	Adcy9	ADCY9
ENSGMOG00000007155	Adcyap1	ADCYAP1
ENSGMOG00000035543	Adcyap1r1	ADCYAP1R1
ENSGMOG00000001536	Adcyap1r1	ADCYAP1R1
ENSGMOG00000003560	Add1	ADD1
ENSGMOG00000008103	Add2	ADD2
ENSGMOG00000014823	Add3	ADD3
ENSGMOG00000016547	Add3	ADD3
ENSGMOG00000023745	Adgb	ADGB
ENSGMOG00000032199	Adgb	ADGB
ENSGMOG00000035007	Adgra1	ADGRA1
ENSGMOG00000006114	Adgra2	ADGRA2
ENSGMOG00000014421	Adgra3	ADGRA3
ENSGMOG00000001859	Adgrb1	ADGRB1
ENSGMOG00000002756	Adgrb1	ADGRB1
ENSGMOG00000018487	Adgrb2	ADGRB2
ENSGMOG00000004867	Adgrb3	ADGRB3
ENSGMOG00000006794	Adgrd1	ADGRD1
ENSGMOG00000026429	Adgre5	ADGRE5
ENSGMOG00000022425	Adgrf5	ADGRF5
ENSGMOG00000036657	Adgrf5	ADGRF5
ENSGMOG00000008550	Adgrf5	ADGRF5
ENSGMOG00000023896	Adgrf5	ADGRF5
ENSGMOG00000033930	Adgrg3	ADGRG3
ENSGMOG00000017731	Adgrg3	ADGRG3
ENSGMOG00000003062	Adgrg6	ADGRG6
ENSGMOG00000016096	Adgrl2	ADGRL2
ENSGMOG00000016062	Adgrl4	ADGRL4
ENSGMOG00000016967	Adgrv1	ADGRV1
ENSGMOG00000010197	Adh5	ADH5
ENSGMOG00000011449	Adhfe1	ADHFE1
ENSGMOG00000034985	Adi1	ADI1
ENSGMOG00000001524	Adipor1	ADIPOR1
ENSGMOG00000005942	Adipor2	ADIPOR2
ENSGMOG00000000194	Adk	ADK
ENSGMOG00000023910	Adm	ADM
ENSGMOG00000009826	Adm2	ADM2
ENSGMOG00000036285	Adnp	ADNP
ENSGMOG00000022489	Adnp	ADNP
ENSGMOG00000024288	Adnp2	ADNP2
ENSGMOG00000018050	Adnp2	ADNP2
ENSGMOG00000012673	Ado	ADO
ENSGMOG00000030754	Ado	ADO
ENSGMOG00000009989	Adora1	ADORA1
ENSGMOG00000030635	Adora1	ADORA1
ENSGMOG00000002899	Adora2a	ADORA2A
ENSGMOG00000010712	Adora2b	ADORA2B
ENSGMOG00000036320	Adora3	ADORA3
ENSGMOG00000010743	Adora3	ADORA3
ENSGMOG00000022919	Adpgk	ADPGK
ENSGMOG00000025469	Adprh	ADPRH
ENSGMOG00000005789	Adprhl1	ADPRHL1
ENSGMOG00000019361	Adprm	ADPRM
ENSGMOG00000004760	Adra1a	ADRA1A
ENSGMOG00000036288	Adra1b	ADRA1B
ENSGMOG00000031337	Adra1b	ADRA1B
ENSGMOG00000020001	Adra1d	ADRA1D
ENSGMOG00000025715	Adra2a	ADRA2A
ENSGMOG00000000928	Adra2b	ADRA2B
ENSGMOG00000007906	Adra2c	ADRA2C
ENSGMOG00000031749	Adrb1	ADRB1
ENSGMOG00000011065	Adrb2	ADRB2
ENSGMOG00000001811	Adrb2	ADRB2
ENSGMOG00000029564	Adrb3	ADRB3
ENSGMOG00000004854	Adrm1	ADRM1
ENSGMOG00000019559	Adrm1	ADRM1
ENSGMOG00000014943	Adsl	ADSL
ENSGMOG00000016228	Adss	ADSS2
ENSGMOG00000011429	Adssl1	ADSS1
ENSGMOG00000034243	Adtrp	ADTRP
ENSGMOG00000016721	Aebp1	AEBP1
ENSGMOG00000015417	Aebp1	AEBP1
ENSGMOG00000031287	Aebp2	AEBP2
ENSGMOG00000005290	Aebp2	AEBP2
ENSGMOG00000011119	Aen	AEN
ENSGMOG00000017747	Aen	AEN
ENSGMOG00000009885	Afap1	AFAP1
ENSGMOG00000011023	Afap1l1	AFAP1L1
ENSGMOG00000001890	Afap1l1	AFAP1L1
ENSGMOG00000015689	Afap1l2	AFAP1L2
ENSGMOG00000002610	Afdn	AFDN
ENSGMOG00000035375	Aff1	AFF1
ENSGMOG00000006067	Aff2	AFF2
ENSGMOG00000028159	Aff3	AFF3
ENSGMOG00000029944	Aff4	AFF4
ENSGMOG00000012751	Afg1l	AFG1L
ENSGMOG00000003907	Afg3l1	AFG3L2
ENSGMOG00000030916	Aftph	AFTPH
ENSGMOG00000006033	Aga	AGA
ENSGMOG00000034953	Agap1	AGAP1
ENSGMOG00000002094	Agap2	AGAP2
ENSGMOG00000011545	Agap2	AGAP2
ENSGMOG00000002916	Agap3	AGAP3
ENSGMOG00000030372	Agbl1	AGBL1
ENSGMOG00000016458	Agbl2	AGBL2
ENSGMOG00000006585	Agbl4	AGBL4
ENSGMOG00000003475	Agbl5	AGBL5
ENSGMOG00000017723	Agfg1	AGFG1
ENSGMOG00000007273	Agfg1	AGFG1
ENSGMOG00000016834	Agfg2	AGFG2
ENSGMOG00000017475	Aggf1	AGGF1
ENSGMOG00000004810	Agk	AGK
ENSGMOG00000009705	Agl	AGL
ENSGMOG00000017508	Agl	AGL
ENSGMOG00000030462	Agmat	AGMAT
ENSGMOG00000005327	Agmo	AGMO
ENSGMOG00000019413	Ago1	AGO1
ENSGMOG00000013651	Ago2	AGO2
ENSGMOG00000019418	Ago3	AGO3
ENSGMOG00000013069	Ago3	AGO3
ENSGMOG00000009544	Ago4	AGO4
ENSGMOG00000007069	Agpat2	AGPAT2
ENSGMOG00000012727	Agpat3	AGPAT3
ENSGMOG00000004460	Agpat4	AGPAT4
ENSGMOG00000005775	Agpat5	AGPAT5
ENSGMOG00000004161	Agps	AGPS
ENSGMOG00000013168	Agr2	AGR2
ENSGMOG00000019888	Agrp	AGRP
ENSGMOG00000018403	Agt	AGT
ENSGMOG00000009325	Agtpbp1	AGTPBP1
ENSGMOG00000026261	Agtr1a	AGTR1
ENSGMOG00000004296	Agtr2	AGTR2
ENSGMOG00000028420	Agtrap	AGTRAP
ENSGMOG00000010512	Agxt	AGXT
ENSGMOG00000009858	Agxt	AGXT
ENSGMOG00000003282	Agxt2	AGXT2
ENSGMOG00000010387	Ahctf1	AHCTF1
ENSGMOG00000004833	Ahcy	AHCY
ENSGMOG00000001249	Ahcyl1	AHCYL1
ENSGMOG00000008038	Ahcyl1	AHCYL1
ENSGMOG00000019402	Ahi1	AHI1
ENSGMOG00000009114	Ahrr	AHRR
ENSGMOG00000036319	Ahrr	AHRR
ENSGMOG00000009345	Ahsa1	AHSA1
ENSGMOG00000005281	Ahsa1	AHSA1
ENSGMOG00000002232	Ahsg	AHSG
ENSGMOG00000022737	AI593442	C11orf87
ENSGMOG00000005522	AI597479	C2orf49
ENSGMOG00000020392	AI837181	C11orf68
ENSGMOG00000004114	Aicda	AICDA
ENSGMOG00000013928	Aida	AIDA
ENSGMOG00000009295	Aif1	AIF1
ENSGMOG00000030758	Aif1l	AIF1L
ENSGMOG00000003708	Aifm1	AIFM1
ENSGMOG00000013109	Aifm2	AIFM2
ENSGMOG00000013064	Aifm3	AIFM3
ENSGMOG00000026416	Aig1	AIG1
ENSGMOG00000006919	Aimp1	AIMP1
ENSGMOG00000017576	Aimp1	AIMP1
ENSGMOG00000004577	Aimp2	AIMP2
ENSGMOG00000013226	Aip	AIP
ENSGMOG00000002494	Aipl1	AIPL1
ENSGMOG00000027920	Aire	AIRE
ENSGMOG00000026474	Ajap1	AJAP1
ENSGMOG00000028462	Ajm1	AJM1
ENSGMOG00000026505	Ajuba	AJUBA
ENSGMOG00000016761	Ak2	AK2
ENSGMOG00000004666	Ak3	AK3
ENSGMOG00000005800	Ak4	AK4
ENSGMOG00000014379	Ak5	AK5
ENSGMOG00000001376	Ak7	AK7
ENSGMOG00000016917	Ak7	AK7
ENSGMOG00000005018	Ak9	AK9
ENSGMOG00000015334	Akap1	AKAP1
ENSGMOG00000010783	Akap10	AKAP10
ENSGMOG00000032401	Akap11	AKAP11
ENSGMOG00000023204	Akap12	AKAP12
ENSGMOG00000025824	Akap13	AKAP13
ENSGMOG00000022462	Akap13	AKAP13
ENSGMOG00000033318	Akap14	AKAP14
ENSGMOG00000033942	Akap14	AKAP14
ENSGMOG00000029297	Akap6	AKAP6
ENSGMOG00000011815	Akap7	AKAP7
ENSGMOG00000023997	Akap8l	AKAP8L
ENSGMOG00000013727	Akirin1	AKIRIN1
ENSGMOG00000010589	Akirin2	AKIRIN2
ENSGMOG00000005097	Akirin2	AKIRIN2
ENSGMOG00000028809	Akna	AKNA
ENSGMOG00000032782	Aknad1	AKNAD1
ENSGMOG00000008732	Akr1a1	AKR1A1
ENSGMOG00000006697	Akr1b3	AKR1B1
ENSGMOG00000005927	Akr1c12	AKR1C3
ENSGMOG00000019445	Akr1c12	AKR1C3
ENSGMOG00000019447	Akr1c12	AKR1C3
ENSGMOG00000004962	Akr1c21	AKR1C2
ENSGMOG00000030018	Akr1c21	AKR1C2
ENSGMOG00000004158	Akr1c21	AKR1C2
ENSGMOG00000000955	Akr1d1	AKR1D1
ENSGMOG00000001441	Akr7a5	AKR7A2
ENSGMOG00000011451	Akt1	AKT1
ENSGMOG00000024894	Akt1	AKT1
ENSGMOG00000028640	Akt1s1	AKT1S1
ENSGMOG00000017678	Akt2	AKT2
ENSGMOG00000001153	Akt2	AKT2
ENSGMOG00000018728	Akt3	AKT3
ENSGMOG00000006022	Aktip	AKTIP
ENSGMOG00000010241	Alad	ALAD
ENSGMOG00000003572	Alas1	ALAS1
ENSGMOG00000002805	Alas1	ALAS1
ENSGMOG00000016077	Alas2	ALAS2
ENSGMOG00000018059	Alcam	ALCAM
ENSGMOG00000010262	Alcam	ALCAM
ENSGMOG00000003317	Aldh16a1	ALDH16A1
ENSGMOG00000016882	Aldh18a1	ALDH18A1
ENSGMOG00000007422	Aldh18a1	ALDH18A1
ENSGMOG00000028605	Aldh18a1	ALDH18A1
ENSGMOG00000015590	Aldh1a2	ALDH1A2
ENSGMOG00000017260	Aldh1a3	ALDH1A3
ENSGMOG00000006409	Aldh1a7	ALDH1A1
ENSGMOG00000012294	Aldh1l1	ALDH1L1
ENSGMOG00000002102	Aldh1l2	ALDH1L2
ENSGMOG00000007666	Aldh2	ALDH2
ENSGMOG00000011875	Aldh3a1	ALDH3A1
ENSGMOG00000006765	Aldh3a1	ALDH3A1
ENSGMOG00000009087	Aldh3a1	ALDH3A1
ENSGMOG00000016427	Aldh5a1	ALDH5A1
ENSGMOG00000011818	Aldh6a1	ALDH6A1
ENSGMOG00000015809	Aldh6a1	ALDH6A1
ENSGMOG00000013593	Aldh7a1	ALDH7A1
ENSGMOG00000001194	Aldh8a1	ALDH8A1
ENSGMOG00000007613	Aldh9a1	ALDH9A1
ENSGMOG00000009709	Aldoa	ALDOA
ENSGMOG00000009708	Aldoa	ALDOA
ENSGMOG00000014842	Aldob	ALDOB
ENSGMOG00000014744	Aldoc	ALDOC
ENSGMOG00000010596	Aldoc	ALDOC
ENSGMOG00000009558	Alg1	ALG1
ENSGMOG00000029704	Alg10b	ALG10
ENSGMOG00000000693	Alg11	ALG11
ENSGMOG00000005241	Alg11	ALG11
ENSGMOG00000006838	Alg12	ALG12
ENSGMOG00000000290	Alg13	ALG13
ENSGMOG00000025407	Alg14	ALG14
ENSGMOG00000028486	Alg2	ALG2
ENSGMOG00000011983	Alg3	ALG3
ENSGMOG00000012311	Alg5	ALG5
ENSGMOG00000018248	Alg6	ALG6
ENSGMOG00000000926	Alg8	ALG8
ENSGMOG00000002491	Alg9	ALG9
ENSGMOG00000022925	Alk	ALK
ENSGMOG00000014962	Alk	ALK
ENSGMOG00000029330	Alkal1	ALKAL1
ENSGMOG00000016932	Alkbh1	ALKBH1
ENSGMOG00000019146	Alkbh3	ALKBH3
ENSGMOG00000036113	Alkbh4	ALKBH4
ENSGMOG00000007690	Alkbh5	ALKBH5
ENSGMOG00000020607	Alkbh6	ALKBH6
ENSGMOG00000003247	Alkbh7	ALKBH7
ENSGMOG00000002720	Alkbh8	ALKBH8
ENSGMOG00000028923	Alox12	ALOX12
ENSGMOG00000016567	Alox12e	ALOX12
ENSGMOG00000006677	Alox5	ALOX5
ENSGMOG00000019255	Alox5ap	ALOX5AP
ENSGMOG00000014351	Alox8	ALOX15B
ENSGMOG00000017186	Alox8	ALOX15B
ENSGMOG00000023399	Aloxe3	ALOXE3
ENSGMOG00000030182	Aloxe3	ALOXE3
ENSGMOG00000025963	Aloxe3	ALOXE3
ENSGMOG00000032012	Aloxe3	ALOXE3
ENSGMOG00000033084	Aloxe3	ALOXE3
ENSGMOG00000002627	Aloxe3	ALOXE3
ENSGMOG00000011438	Alpk1	ALPK1
ENSGMOG00000023919	Alpk2	ALPK2
ENSGMOG00000022836	Alpk3	ALPK3
ENSGMOG00000033955	Alpk3	ALPK3
ENSGMOG00000006486	Alpk3	ALPK3
ENSGMOG00000019071	Alpl	ALPL
ENSGMOG00000001225	Alppl2	ALPG
ENSGMOG00000007250	Als2	ALS2
ENSGMOG00000007917	Alx1	ALX1
ENSGMOG00000023215	Alx3	ALX3
ENSGMOG00000032809	Alx4	ALX4
ENSGMOG00000035528	Alx4	ALX4
ENSGMOG00000014886	Amacr	AMACR
ENSGMOG00000003869	Ambp	AMBP
ENSGMOG00000014863	Ambra1	AMBRA1
ENSGMOG00000002541	Amd2	AMD1
ENSGMOG00000007738	Amdhd1	AMDHD1
ENSGMOG00000005360	Amdhd2	AMDHD2
ENSGMOG00000027534	Amer1	AMER1
ENSGMOG00000031265	Amer2	AMER2
ENSGMOG00000016981	Amfr	AMFR
ENSGMOG00000008768	Amh	AMH
ENSGMOG00000001327	Amhr2	AMHR2
ENSGMOG00000027584	Amigo1	AMIGO1
ENSGMOG00000023759	Amigo1	AMIGO1
ENSGMOG00000036179	Amigo2	AMIGO2
ENSGMOG00000028639	Amigo3	AMIGO3
ENSGMOG00000037019	Amigo3	AMIGO3
ENSGMOG00000028220	Ammecr1	AMMECR1
ENSGMOG00000029679	Ammecr1	AMMECR1
ENSGMOG00000010915	Ammecr1	AMMECR1
ENSGMOG00000036672	Amn	AMN
ENSGMOG00000027508	Amn1	AMN1
ENSGMOG00000018299	Amot	AMOT
ENSGMOG00000030822	Amotl2	AMOTL2
ENSGMOG00000009481	Amotl2	AMOTL2
ENSGMOG00000012722	Ampd1	AMPD1
ENSGMOG00000008001	Ampd2	AMPD2
ENSGMOG00000001039	Ampd2	AMPD2
ENSGMOG00000001940	Ampd3	AMPD3
ENSGMOG00000010586	Ampd3	AMPD3
ENSGMOG00000010219	Amph	AMPH
ENSGMOG00000010486	Amt	AMT
ENSGMOG00000012440	Amy1	AMY1A
ENSGMOG00000009598	Anapc1	ANAPC1
ENSGMOG00000007142	Anapc10	ANAPC10
ENSGMOG00000031405	Anapc11	ANAPC11
ENSGMOG00000033056	Anapc13	ANAPC13
ENSGMOG00000017474	Anapc15-ps	ANAPC15
ENSGMOG00000025500	Anapc16	ANAPC16
ENSGMOG00000015190	Anapc2	ANAPC2
ENSGMOG00000007748	Anapc4	ANAPC4
ENSGMOG00000028555	Anapc5	ANAPC5
ENSGMOG00000003084	Anapc7	ANAPC7
ENSGMOG00000022608	Angel1	ANGEL1
ENSGMOG00000015390	Angel1	ANGEL1
ENSGMOG00000022813	Angel2	ANGEL2
ENSGMOG00000002740	Angpt1	ANGPT1
ENSGMOG00000005822	Angpt2	ANGPT2
ENSGMOG00000036758	Angpt4	ANGPT4
ENSGMOG00000005911	Angptl1	ANGPTL1
ENSGMOG00000016021	Angptl1	ANGPTL1
ENSGMOG00000006472	Angptl2	ANGPTL2
ENSGMOG00000018204	Angptl3	ANGPTL3
ENSGMOG00000001102	Angptl4	ANGPTL4
ENSGMOG00000010268	Angptl4	ANGPTL4
ENSGMOG00000009770	Angptl7	ANGPTL7
ENSGMOG00000006060	Ank	ANKH
ENSGMOG00000012205	Ank1	ANK1
ENSGMOG00000016731	Ank1	ANK1
ENSGMOG00000006752	Ank2	ANK2
ENSGMOG00000018620	Ank3	ANK3
ENSGMOG00000022865	Ank3	ANK3
ENSGMOG00000004409	Ankdd1a	ANKDD1A
ENSGMOG00000010928	Ankdd1b	ANKDD1B
ENSGMOG00000006375	Ankef1	ANKEF1
ENSGMOG00000032540	Ankef1	ANKEF1
ENSGMOG00000012992	Ankfn1	ANKFN1
ENSGMOG00000012308	Ankfy1	ANKFY1
ENSGMOG00000006761	Ankhd1	ANKHD1-EIF4EBP3
ENSGMOG00000003489	Ankib1	ANKIB1
ENSGMOG00000006537	Ankk1	ANKK1
ENSGMOG00000023800	Ankle1	ANKLE1
ENSGMOG00000007676	Ankle2	ANKLE2
ENSGMOG00000008740	Ankmy1	ANKMY1
ENSGMOG00000004585	Ankmy2	ANKMY2
ENSGMOG00000012757	Ankmy2	ANKMY2
ENSGMOG00000000317	Ankra2	ANKRA2
ENSGMOG00000013507	Ankrd1	ANKRD1
ENSGMOG00000011719	Ankrd1	ANKRD1
ENSGMOG00000003320	Ankrd10	ANKRD10
ENSGMOG00000035938	Ankrd11	ANKRD11
ENSGMOG00000034301	Ankrd12	ANKRD12
ENSGMOG00000008800	Ankrd13a	ANKRD13A
ENSGMOG00000018065	Ankrd13b	ANKRD13B
ENSGMOG00000015926	Ankrd13c	ANKRD13C
ENSGMOG00000002222	Ankrd13c	ANKRD13C
ENSGMOG00000014181	Ankrd13d	ANKRD13D
ENSGMOG00000002551	Ankrd16	ANKRD16
ENSGMOG00000022190	Ankrd2	ANKRD2
ENSGMOG00000024319	Ankrd22	ANKRD22
ENSGMOG00000026172	Ankrd27	ANKRD27
ENSGMOG00000015442	Ankrd28	ANKRD28
ENSGMOG00000012039	Ankrd28	ANKRD28
ENSGMOG00000019002	Ankrd29	ANKRD29
ENSGMOG00000004429	Ankrd33	ANKRD33
ENSGMOG00000033868	Ankrd33	ANKRD33
ENSGMOG00000011371	Ankrd33b	ANKRD33B
ENSGMOG00000006410	Ankrd33b	ANKRD33B
ENSGMOG00000034614	Ankrd34a	ANKRD34A
ENSGMOG00000034734	Ankrd34b	ANKRD34B
ENSGMOG00000036297	Ankrd39	ANKRD39
ENSGMOG00000023043	Ankrd40	ANKRD40
ENSGMOG00000006735	Ankrd44	ANKRD44
ENSGMOG00000026423	Ankrd46	ANKRD46
ENSGMOG00000031164	Ankrd49	ANKRD49
ENSGMOG00000023665	Ankrd50	ANKRD50
ENSGMOG00000015378	Ankrd52	ANKRD52
ENSGMOG00000007343	Ankrd52	ANKRD52
ENSGMOG00000027818	Ankrd53	ANKRD53
ENSGMOG00000004561	Ankrd54	ANKRD54
ENSGMOG00000001610	Ankrd55	ANKRD55
ENSGMOG00000002106	Ankrd6	ANKRD6
ENSGMOG00000004384	Ankrd61	ANKRD61
ENSGMOG00000024972	Ankrd63	ANKRD63
ENSGMOG00000030360	Ankrd9	ANKRD9
ENSGMOG00000009954	Anks1	ANKS1A
ENSGMOG00000009224	Anks1b	ANKS1B
ENSGMOG00000016821	Anks3	ANKS3
ENSGMOG00000008850	Anks4b	ANKS4B
ENSGMOG00000009131	Anks6	ANKS6
ENSGMOG00000005890	Ankub1	ANKUB1
ENSGMOG00000019299	Ankzf1	ANKZF1
ENSGMOG00000009030	Anln	ANLN
ENSGMOG00000014890	Ano1	ANO1
ENSGMOG00000012797	Ano1	ANO1
ENSGMOG00000014764	Ano10	ANO10
ENSGMOG00000018586	Ano3	ANO3
ENSGMOG00000018688	Ano4	ANO4
ENSGMOG00000018479	Ano5	ANO5
ENSGMOG00000018841	Ano5	ANO5
ENSGMOG00000003011	Ano6	ANO6
ENSGMOG00000015396	Ano7	ANO7
ENSGMOG00000018470	Ano8	ANO8
ENSGMOG00000010370	Ano8	ANO8
ENSGMOG00000005940	Ano9	ANO9
ENSGMOG00000018449	Ano9	ANO9
ENSGMOG00000028020	Ano9	ANO9
ENSGMOG00000016403	Anp32b	ANP32B
ENSGMOG00000035124	Anp32e	ANP32E
ENSGMOG00000026325	Anpep	ANPEP
ENSGMOG00000017357	Anpep	ANPEP
ENSGMOG00000000197	Anpep	ANPEP
ENSGMOG00000010071	Antxr1	ANTXR1
ENSGMOG00000005888	Antxr1	ANTXR1
ENSGMOG00000015589	Antxr2	ANTXR2
ENSGMOG00000011819	Antxr2	ANTXR2
ENSGMOG00000004147	Antxrl	ANTXRL
ENSGMOG00000005581	Antxrl	ANTXRL
ENSGMOG00000006476	Anxa1	ANXA1
ENSGMOG00000010164	Anxa1	ANXA1
ENSGMOG00000000800	Anxa2	ANXA2
ENSGMOG00000004690	Anxa3	ANXA3
ENSGMOG00000010040	Anxa4	ANXA4
ENSGMOG00000019400	Anxa5	ANXA5
ENSGMOG00000001284	Anxa5	ANXA5
ENSGMOG00000006883	Anxa6	ANXA6
ENSGMOG00000011806	Anxa9	ANXA9
ENSGMOG00000015690	Anxa9	ANXA9
ENSGMOG00000015108	Anxa9	ANXA9
ENSGMOG00000003109	Aoc1	AOC1
ENSGMOG00000016739	Aoc3	AOC3
ENSGMOG00000007782	Aopep	AOPEP
ENSGMOG00000000752	Aox4	XDH
ENSGMOG00000012252	Ap1b1	AP1B1
ENSGMOG00000015247	Ap1g1	AP1G1
ENSGMOG00000004105	Ap1g2	AP1G2
ENSGMOG00000008680	Ap1m1	AP1M1
ENSGMOG00000012498	Ap1m1	AP1M1
ENSGMOG00000017224	Ap1m2	AP1M2
ENSGMOG00000010148	Ap1s1	AP1S1
ENSGMOG00000006201	Ap1s3	AP1S3
ENSGMOG00000004536	Ap2a1	AP2A1
ENSGMOG00000000019	Ap2a2	AP2A2
ENSGMOG00000005184	Ap2b1	AP2B1
ENSGMOG00000001915	Ap2m1	AP2M1
ENSGMOG00000007857	Ap2m1	AP2M1
ENSGMOG00000001825	Ap2s1	AP2S1
ENSGMOG00000008400	Ap3b1	AP3B1
ENSGMOG00000013545	Ap3b2	AP3B2
ENSGMOG00000014540	Ap3d1	AP3D1
ENSGMOG00000005938	Ap3m1	AP3M1
ENSGMOG00000008074	Ap3m2	AP3M2
ENSGMOG00000007312	Ap3s1	AP3S1
ENSGMOG00000024300	Ap3s2	AP3S2
ENSGMOG00000006144	Ap4b1	AP4B1
ENSGMOG00000010180	Ap4e1	AP4E1
ENSGMOG00000000244	Ap4m1	AP4M1
ENSGMOG00000006133	Ap4s1	AP4S1
ENSGMOG00000004997	Ap5b1	AP5B1
ENSGMOG00000016292	Ap5m1	AP5M1
ENSGMOG00000030914	Ap5s1	AP5S1
ENSGMOG00000014006	Ap5z1	AP5Z1
ENSGMOG00000025430	Apba1	APBA1
ENSGMOG00000032000	Apba1	APBA1
ENSGMOG00000004377	Apba2	APBA2
ENSGMOG00000026360	Apba2	APBA2
ENSGMOG00000022769	Apba3	APBA3
ENSGMOG00000007202	Apbb1	APBB1
ENSGMOG00000025601	Apbb1ip	APBB1IP
ENSGMOG00000006178	Apbb1ip	APBB1IP
ENSGMOG00000031092	Apbb2	APBB2
ENSGMOG00000009728	Apbb2	APBB2
ENSGMOG00000012352	Apbb3	APBB3
ENSGMOG00000030843	Apc	APC
ENSGMOG00000003110	Apeh	APEH
ENSGMOG00000007943	Apex1	APEX1
ENSGMOG00000019681	Apex2	APEX2
ENSGMOG00000011343	Aph1b	APH1B
ENSGMOG00000019118	Api5	API5
ENSGMOG00000011141	Apip	APIP
ENSGMOG00000035362	Aplf	APLF
ENSGMOG00000023538	Aplnr	APLNR
ENSGMOG00000000126	Aplp1	APLP1
ENSGMOG00000013446	Aplp2	APLP2
ENSGMOG00000000635	Apmap	APMAP
ENSGMOG00000004100	Apoa1	APOA1
ENSGMOG00000001758	Apoa1	APOA1
ENSGMOG00000027629	Apob	APOB
ENSGMOG00000017133	Apob	APOB
ENSGMOG00000006819	Apobec2	APOBEC2
ENSGMOG00000007028	Apobec2	APOBEC2
ENSGMOG00000037061	Apod	APOD
ENSGMOG00000012542	Apod	APOD
ENSGMOG00000012546	Apod	APOD
ENSGMOG00000024212	Apod	APOD
ENSGMOG00000023668	Apod	APOD
ENSGMOG00000013837	Apoe	APOE
ENSGMOG00000024367	Apof	APOF
ENSGMOG00000022910	Apol7a	APOL3
ENSGMOG00000009453	Apol7a	APOL3
ENSGMOG00000026787	Apol7a	APOL3
ENSGMOG00000031588	Apol7a	APOL3
ENSGMOG00000036472	Apol7a	APOL3
ENSGMOG00000025381	Apold1	APOLD1
ENSGMOG00000036397	Apold1	APOLD1
ENSGMOG00000027294	Apold1	APOLD1
ENSGMOG00000025113	Apold1	APOLD1
ENSGMOG00000027495	Apoo	APOO
ENSGMOG00000004355	Apoo	APOO
ENSGMOG00000032415	Apool	APOOL
ENSGMOG00000003202	App	APP
ENSGMOG00000003156	App	APP
ENSGMOG00000002788	Appbp2	APPBP2
ENSGMOG00000013673	Appl1	APPL1
ENSGMOG00000008980	Appl2	APPL2
ENSGMOG00000002470	Aprt	APRT
ENSGMOG00000012505	Aptx	APTX
ENSGMOG00000026810	Aqp11	AQP11
ENSGMOG00000023961	Aqp11	AQP11
ENSGMOG00000032886	Aqp12	AQP12B
ENSGMOG00000008057	Aqp3	AQP3
ENSGMOG00000000677	Aqp3	AQP3
ENSGMOG00000015105	Aqp4	AQP4
ENSGMOG00000015825	Aqp6	AQP6
ENSGMOG00000004272	Aqp6	AQP6
ENSGMOG00000015575	Aqp6	AQP6
ENSGMOG00000008759	Aqp7	AQP7
ENSGMOG00000032268	Aqp8	AQP8
ENSGMOG00000001220	Aqp8	AQP8
ENSGMOG00000010790	Aqp9	AQP9
ENSGMOG00000033416	Aqp9	AQP9
ENSGMOG00000007960	Aqp9	AQP9
ENSGMOG00000009823	Aqr	AQR
ENSGMOG00000010216	Ar	AR
ENSGMOG00000004074	Ar	AR
ENSGMOG00000012642	Araf	ARAF
ENSGMOG00000017266	Arap1	ARAP1
ENSGMOG00000010984	Arcn1	ARCN1
ENSGMOG00000015665	Arel1	AREL1
ENSGMOG00000007850	Arf1	ARF1
ENSGMOG00000004803	Arf3	ARF3
ENSGMOG00000019109	Arf5	ARF5
ENSGMOG00000008747	Arf5	ARF5
ENSGMOG00000020564	Arf6	ARF6
ENSGMOG00000015063	Arfgap1	ARFGAP1
ENSGMOG00000014867	Arfgap2	ARFGAP2
ENSGMOG00000009382	Arfgap3	ARFGAP3
ENSGMOG00000016880	Arfgef1	ARFGEF1
ENSGMOG00000017312	Arfgef2	ARFGEF2
ENSGMOG00000001660	Arfgef3	ARFGEF3
ENSGMOG00000030060	Arfip1	ARFIP1
ENSGMOG00000000539	Arfip1	ARFIP1
ENSGMOG00000001005	Arfip2	ARFIP2
ENSGMOG00000030244	Arfip2	ARFIP2
ENSGMOG00000015683	Arfrp1	ARFRP1
ENSGMOG00000011638	Arg1	ARG1
ENSGMOG00000014044	Arg2	ARG2
ENSGMOG00000029930	Arglu1	ARGLU1
ENSGMOG00000014435	Arhgap1	ARHGAP1
ENSGMOG00000001911	Arhgap10	ARHGAP10
ENSGMOG00000024531	Arhgap11a	ARHGAP11A
ENSGMOG00000001432	Arhgap11a	ARHGAP11A
ENSGMOG00000000536	Arhgap12	ARHGAP12
ENSGMOG00000023998	Arhgap12	ARHGAP12
ENSGMOG00000012779	Arhgap15	ARHGAP15
ENSGMOG00000035125	Arhgap17	ARHGAP17
ENSGMOG00000011331	Arhgap17	ARHGAP17
ENSGMOG00000006279	Arhgap18	ARHGAP18
ENSGMOG00000018205	Arhgap19	ARHGAP19
ENSGMOG00000000581	Arhgap19	ARHGAP19
ENSGMOG00000011355	Arhgap20	ARHGAP20
ENSGMOG00000010143	Arhgap21	ARHGAP21
ENSGMOG00000036937	Arhgap21	ARHGAP21
ENSGMOG00000003901	Arhgap22	ARHGAP22
ENSGMOG00000005400	Arhgap22	ARHGAP22
ENSGMOG00000023603	Arhgap24	ARHGAP24
ENSGMOG00000006611	Arhgap25	ARHGAP25
ENSGMOG00000011388	Arhgap26	ARHGAP26
ENSGMOG00000029408	Arhgap27	ARHGAP27
ENSGMOG00000007638	Arhgap27	ARHGAP27
ENSGMOG00000022688	Arhgap28	ARHGAP28
ENSGMOG00000019084	Arhgap29	ARHGAP29
ENSGMOG00000012409	Arhgap29	ARHGAP29
ENSGMOG00000033627	Arhgap31	ARHGAP31
ENSGMOG00000011282	Arhgap32	ARHGAP32
ENSGMOG00000010483	Arhgap32	ARHGAP32
ENSGMOG00000036826	Arhgap36	ARHGAP36
ENSGMOG00000027434	Arhgap39	ARHGAP39
ENSGMOG00000008303	Arhgap4	ARHGAP4
ENSGMOG00000036372	Arhgap4	ARHGAP4
ENSGMOG00000007921	Arhgap40	ARHGAP40
ENSGMOG00000002950	Arhgap42	ARHGAP42
ENSGMOG00000002257	Arhgap42	ARHGAP42
ENSGMOG00000007709	Arhgap44	ARHGAP44
ENSGMOG00000011627	Arhgap44	ARHGAP44
ENSGMOG00000007579	Arhgap45	ARHGAP45
ENSGMOG00000007539	Arhgap5	ARHGAP5
ENSGMOG00000015892	Arhgap6	ARHGAP6
ENSGMOG00000012425	Arhgap8	ARHGAP8
ENSGMOG00000007982	Arhgap9	ARHGAP9
ENSGMOG00000036600	Arhgdia	ARHGDIA
ENSGMOG00000013112	Arhgdig	ARHGDIG
ENSGMOG00000018768	Arhgef1	ARHGEF1
ENSGMOG00000024574	Arhgef10	ARHGEF10
ENSGMOG00000009798	Arhgef10l	ARHGEF10L
ENSGMOG00000008432	Arhgef11	ARHGEF11
ENSGMOG00000006673	Arhgef12	ARHGEF12
ENSGMOG00000034134	Arhgef12	ARHGEF12
ENSGMOG00000025065	Arhgef12	ARHGEF12
ENSGMOG00000030375	Arhgef15	ARHGEF15
ENSGMOG00000015237	Arhgef16	ARHGEF16
ENSGMOG00000010857	Arhgef17	ARHGEF17
ENSGMOG00000013360	Arhgef18	ARHGEF18
ENSGMOG00000012527	Arhgef18	ARHGEF18
ENSGMOG00000008378	Arhgef19	ARHGEF19
ENSGMOG00000022292	Arhgef2	ARHGEF2
ENSGMOG00000004518	Arhgef2	ARHGEF2
ENSGMOG00000007540	Arhgef25	ARHGEF25
ENSGMOG00000013871	Arhgef26	ARHGEF26
ENSGMOG00000007258	Arhgef28	ARHGEF28
ENSGMOG00000000254	Arhgef28	ARHGEF28
ENSGMOG00000011344	Arhgef3	ARHGEF3
ENSGMOG00000014487	Arhgef37	ARHGEF37
ENSGMOG00000017772	Arhgef38	ARHGEF38
ENSGMOG00000017732	Arhgef38	ARHGEF38
ENSGMOG00000033472	Arhgef39	ARHGEF39
ENSGMOG00000011210	Arhgef4	ARHGEF4
ENSGMOG00000023461	Arhgef5	ARHGEF5
ENSGMOG00000004513	Arhgef6	ARHGEF6
ENSGMOG00000004297	Arhgef7	ARHGEF7
ENSGMOG00000012557	Arhgef7	ARHGEF7
ENSGMOG00000004165	Arhgef9	ARHGEF9
ENSGMOG00000023083	Arid1a	ARID1A
ENSGMOG00000001024	Arid1a	ARID1A
ENSGMOG00000029386	Arid1b	ARID1B
ENSGMOG00000023203	Arid1b	ARID1B
ENSGMOG00000016013	Arid2	ARID2
ENSGMOG00000001211	Arid3a	ARID3A
ENSGMOG00000008141	Arid3b	ARID3B
ENSGMOG00000002555	Arid3b	ARID3B
ENSGMOG00000017334	Arid4a	ARID4A
ENSGMOG00000018747	Arid4b	ARID4B
ENSGMOG00000008347	Arih1	ARIH1
ENSGMOG00000019261	Arih2	ARIH2
ENSGMOG00000006859	Arl1	ARL1
ENSGMOG00000004201	Arl10	ARL10
ENSGMOG00000005087	Arl13a	ARL13A
ENSGMOG00000018628	Arl13b	ARL13B
ENSGMOG00000005413	Arl14ep	ARL14EP
ENSGMOG00000007408	Arl15	ARL15
ENSGMOG00000035035	Arl16	ARL16
ENSGMOG00000011008	Arl2	ARL2
ENSGMOG00000005182	Arl2bp	ARL2BP
ENSGMOG00000001544	Arl3	ARL3
ENSGMOG00000020530	Arl4a	ARL4A
ENSGMOG00000020536	Arl4a	ARL4A
ENSGMOG00000024456	Arl4d	ARL4D
ENSGMOG00000012994	Arl5a	ARL5A
ENSGMOG00000033264	Arl5b	ARL5B
ENSGMOG00000036908	Arl6	ARL6
ENSGMOG00000007007	Arl6	ARL6
ENSGMOG00000014972	Arl6ip1	ARL6IP1
ENSGMOG00000012151	Arl6ip4	ARL6IP4
ENSGMOG00000007454	Arl6ip5	ARL6IP5
ENSGMOG00000010233	Arl6ip5	ARL6IP5
ENSGMOG00000026821	Arl6ip6	ARL6IP6
ENSGMOG00000028595	Arl8a	ARL8A
ENSGMOG00000002416	Arl8b	ARL8B
ENSGMOG00000016780	Arl8b	ARL8B
ENSGMOG00000033937	Arl9	ARL9
ENSGMOG00000023013	Armc1	ARMC1
ENSGMOG00000009251	Armc1	ARMC1
ENSGMOG00000025505	Armc12	ARMC12
ENSGMOG00000005690	Armc2	ARMC2
ENSGMOG00000008711	Armc3	ARMC3
ENSGMOG00000028589	Armc5	ARMC5
ENSGMOG00000012115	Armc6	ARMC6
ENSGMOG00000006940	Armc8	ARMC8
ENSGMOG00000001382	Armc9	ARMC9
ENSGMOG00000019516	Armh3	ARMH3
ENSGMOG00000025099	Armh4	ARMH4
ENSGMOG00000022447	Armt1	ARMT1
ENSGMOG00000006058	Arnt	ARNT
ENSGMOG00000014557	Arnt2	ARNT2
ENSGMOG00000008906	Arntl	ARNTL
ENSGMOG00000003843	Arntl2	ARNTL2
ENSGMOG00000007758	Arpc1b	ARPC1B
ENSGMOG00000008637	Arpc2	ARPC2
ENSGMOG00000012050	Arpc3	ARPC3
ENSGMOG00000007717	Arpc4	ARPC4
ENSGMOG00000009483	Arpc4	ARPC4
ENSGMOG00000010856	Arpc5	ARPC5
ENSGMOG00000017134	Arpin	ARPIN
ENSGMOG00000010969	Arr3	ARR3
ENSGMOG00000004118	Arr3	ARR3
ENSGMOG00000000240	Arrb2	ARRB2
ENSGMOG00000024332	Arrdc1	ARRDC1
ENSGMOG00000007586	Arrdc2	ARRDC2
ENSGMOG00000016946	Arrdc3	ARRDC3
ENSGMOG00000011069	Arrdc5	ARRDC5
ENSGMOG00000036026	Arrdc5	ARRDC5
ENSGMOG00000000709	Arrdc5	ARRDC5
ENSGMOG00000000754	Arrdc5	ARRDC5
ENSGMOG00000011055	Arrdc5	ARRDC5
ENSGMOG00000012972	Arrdc5	ARRDC5
ENSGMOG00000026305	Arrdc5	ARRDC5
ENSGMOG00000035313	Arrdc5	ARRDC5
ENSGMOG00000012264	Arsa	ARSA
ENSGMOG00000008406	Arsb	ARSB
ENSGMOG00000013121	Arsg	ARSG
ENSGMOG00000031551	Arsi	ARSI
ENSGMOG00000003248	Arsj	ARSJ
ENSGMOG00000016934	Arsk	ARSK
ENSGMOG00000032565	Artn	ARTN
ENSGMOG00000036118	Artn	ARTN
ENSGMOG00000015581	Arv1	ARV1
ENSGMOG00000034656	Arvcf	ARVCF
ENSGMOG00000031058	Arx	ARX
ENSGMOG00000031371	Arxes2	SPCS3
ENSGMOG00000011671	As3mt	AS3MT
ENSGMOG00000015618	As3mt	AS3MT
ENSGMOG00000000876	Asah1	ASAH1
ENSGMOG00000030487	Asah2	ASAH2
ENSGMOG00000006138	Asap1	ASAP1
ENSGMOG00000009915	Asap1	ASAP1
ENSGMOG00000011249	Asap2	ASAP2
ENSGMOG00000002971	Asb10	ASB10
ENSGMOG00000027043	Asb12	ASB12
ENSGMOG00000004156	Asb12	ASB12
ENSGMOG00000027573	Asb13	ASB13
ENSGMOG00000010137	Asb13	ASB13
ENSGMOG00000002512	Asb13	ASB13
ENSGMOG00000013339	Asb14	ASB14
ENSGMOG00000017719	Asb14	ASB14
ENSGMOG00000010864	Asb15	ASB15
ENSGMOG00000010258	Asb15	ASB15
ENSGMOG00000032035	Asb16	ASB16
ENSGMOG00000009116	Asb2	ASB2
ENSGMOG00000010459	Asb2	ASB2
ENSGMOG00000036309	Asb2	ASB2
ENSGMOG00000012073	Asb3	ASB3
ENSGMOG00000035193	Asb3	ASB3
ENSGMOG00000022619	Asb3	ASB3
ENSGMOG00000013559	Asb4	ASB4
ENSGMOG00000028721	Asb6	ASB6
ENSGMOG00000017250	Asb7	ASB7
ENSGMOG00000008251	Asb8	ASB8
ENSGMOG00000000360	Ascc1	ASCC1
ENSGMOG00000006224	Ascc2	ASCC2
ENSGMOG00000018158	Ascc3	ASCC3
ENSGMOG00000027313	Ascl2	ASCL2
ENSGMOG00000025077	Ascl4	ASCL4
ENSGMOG00000008200	Asf1b	ASF1B
ENSGMOG00000026862	Ash1l	ASH1L
ENSGMOG00000015372	Ash2l	ASH2L
ENSGMOG00000009659	Asic1	ASIC1
ENSGMOG00000017812	Asic2	ASIC2
ENSGMOG00000012740	Asic4	ASIC4
ENSGMOG00000011337	Asl	ASL
ENSGMOG00000000351	Asmt	ASMT
ENSGMOG00000005439	Asns	ASNS
ENSGMOG00000024326	Asnsd1	ASNSD1
ENSGMOG00000010763	Aspa	ASPA
ENSGMOG00000010931	Aspdh	ASPDH
ENSGMOG00000023147	Aspg	ASPG
ENSGMOG00000010298	Aspg	ASPG
ENSGMOG00000002977	Aspg	ASPG
ENSGMOG00000026409	Aspg	ASPG
ENSGMOG00000022239	Aspg	ASPG
ENSGMOG00000026061	Aspg	ASPG
ENSGMOG00000015739	Aspg	ASPG
ENSGMOG00000026322	Asphd2	ASPHD2
ENSGMOG00000036868	Asphd2	ASPHD2
ENSGMOG00000036993	Aspm	ASPM
ENSGMOG00000002875	Aspn	ASPN
ENSGMOG00000035704	Asprv1	ASPRV1
ENSGMOG00000000923	Aspscr1	ASPSCR1
ENSGMOG00000017200	Asrgl1	ASRGL1
ENSGMOG00000017022	Ass1	ASS1
ENSGMOG00000030835	Aste1	ASTE1
ENSGMOG00000016274	Astl	ASTL
ENSGMOG00000026914	Astl	ASTL
ENSGMOG00000004081	Astl	ASTL
ENSGMOG00000023377	Astl	ASTL
ENSGMOG00000034169	Astl	ASTL
ENSGMOG00000031166	Astl	ASTL
ENSGMOG00000035851	Astl	ASTL
ENSGMOG00000020481	Astl	ASTL
ENSGMOG00000001009	Astn1	ASTN1
ENSGMOG00000002118	Astn2	ASTN2
ENSGMOG00000009096	Asxl1	ASXL1
ENSGMOG00000004155	Asxl2	ASXL2
ENSGMOG00000002932	Asz1	ASZ1
ENSGMOG00000011547	Atad1	ATAD1
ENSGMOG00000007603	Atad1	ATAD1
ENSGMOG00000010535	Atad2b	ATAD2B
ENSGMOG00000008122	Atad3a	ATAD3A
ENSGMOG00000028659	Atad5	ATAD5
ENSGMOG00000017734	Atat1	ATAT1
ENSGMOG00000013573	Atcay	ATCAY
ENSGMOG00000012512	Atcay	ATCAY
ENSGMOG00000016947	Ate1	ATE1
ENSGMOG00000004396	Atf2	ATF2
ENSGMOG00000033542	Atf3	ATF3
ENSGMOG00000029120	Atf4	ATF4
ENSGMOG00000026369	Atf4	ATF4
ENSGMOG00000026593	Atf5	ATF5
ENSGMOG00000029360	Atf5	ATF5
ENSGMOG00000018033	Atf6	ATF6
ENSGMOG00000012804	Atf6b	ATF6B
ENSGMOG00000000592	Atf7	ATF7
ENSGMOG00000008255	Atf7	ATF7
ENSGMOG00000026883	Atf7ip	ATF7IP
ENSGMOG00000036763	Atg10	ATG10
ENSGMOG00000012194	Atg101	ATG101
ENSGMOG00000004463	Atg12	ATG12
ENSGMOG00000015738	Atg13	ATG13
ENSGMOG00000028864	Atg14	ATG14
ENSGMOG00000000521	Atg16l1	ATG16L1
ENSGMOG00000017903	Atg16l2	ATG16L2
ENSGMOG00000008772	Atg2a	ATG2A
ENSGMOG00000015676	Atg2b	ATG2B
ENSGMOG00000018780	Atg3	ATG3
ENSGMOG00000009874	Atg4b	ATG4B
ENSGMOG00000018222	Atg4c	ATG4C
ENSGMOG00000035221	Atg4d	ATG4D
ENSGMOG00000024902	Atg4d	ATG4D
ENSGMOG00000009722	Atg5	ATG5
ENSGMOG00000010427	Atg7	ATG7
ENSGMOG00000010871	Atg9a	ATG9A
ENSGMOG00000003192	Atg9b	ATG9B
ENSGMOG00000000421	Atic	ATIC
ENSGMOG00000001077	Atl1	ATL1
ENSGMOG00000015972	Atl2	ATL2
ENSGMOG00000018483	Atl2	ATL2
ENSGMOG00000003308	Atl3	ATL3
ENSGMOG00000008875	Atm	ATM
ENSGMOG00000030655	Atmin	ATMIN
ENSGMOG00000025713	Atn1	ATN1
ENSGMOG00000033998	Atoh7	ATOH7
ENSGMOG00000023143	Atoh8	ATOH8
ENSGMOG00000004322	Atp10a	ATP10A
ENSGMOG00000029152	Atp10b	ATP10B
ENSGMOG00000001064	Atp10d	ATP10D
ENSGMOG00000012548	Atp11a	ATP11A
ENSGMOG00000000064	Atp11a	ATP11A
ENSGMOG00000008504	Atp11b	ATP11B
ENSGMOG00000004238	Atp11c	ATP11C
ENSGMOG00000009337	Atp13a1	ATP13A1
ENSGMOG00000008371	Atp13a2	ATP13A2
ENSGMOG00000015775	Atp13a3	ATP13A3
ENSGMOG00000005261	Atp1a1	ATP1A1
ENSGMOG00000005903	Atp1a4	ATP1A4
ENSGMOG00000003698	Atp1a4	ATP1A4
ENSGMOG00000014735	Atp1a4	ATP1A4
ENSGMOG00000014788	Atp1a4	ATP1A4
ENSGMOG00000024366	Atp1b1	ATP1B1
ENSGMOG00000007206	Atp1b1	ATP1B1
ENSGMOG00000018680	Atp1b2	ATP1B2
ENSGMOG00000007669	Atp1b2	ATP1B2
ENSGMOG00000017791	Atp1b3	ATP1B3
ENSGMOG00000001542	Atp1b4	ATP1B4
ENSGMOG00000023139	Atp23	ATP23
ENSGMOG00000012338	Atp2a3	ATP2A3
ENSGMOG00000006390	Atp2b1	ATP2B1
ENSGMOG00000012854	Atp2b4	ATP2B4
ENSGMOG00000001128	Atp2c1	ATP2C1
ENSGMOG00000015889	Atp4a	ATP4A
ENSGMOG00000000187	Atp4b	ATP4B
ENSGMOG00000007507	Atp5a1	ATP5F1A
ENSGMOG00000003008	Atp5b	ATP5F1B
ENSGMOG00000010121	Atp5b	ATP5F1B
ENSGMOG00000003527	Atp5c1	ATP5F1C
ENSGMOG00000011884	Atp5d	ATP5F1D
ENSGMOG00000004380	Atp5g3	ATP5MC3
ENSGMOG00000014585	Atp5h	ATP5PD
ENSGMOG00000003197	Atp5j	ATP5PF
ENSGMOG00000034690	Atp5j	ATP5PF
ENSGMOG00000030132	Atp5k	ATP5ME
ENSGMOG00000018044	Atp5l	ATP5MG
ENSGMOG00000016275	Atp5o	ATP5PO
ENSGMOG00000004176	Atp5pb	ATP5PB
ENSGMOG00000018829	Atp6ap1	ATP6AP1
ENSGMOG00000003605	Atp6ap1	ATP6AP1
ENSGMOG00000035779	Atp6ap1l	ATP6AP1L
ENSGMOG00000018035	Atp6ap1l	ATP6AP1L
ENSGMOG00000009054	Atp6ap2	ATP6AP2
ENSGMOG00000014893	Atp6v0a1	ATP6V0A1
ENSGMOG00000014100	Atp6v0a1	ATP6V0A1
ENSGMOG00000008927	Atp6v0a2	ATP6V0A2
ENSGMOG00000010198	Atp6v0a2	ATP6V0A2
ENSGMOG00000000295	Atp6v0b	ATP6V0B
ENSGMOG00000036522	Atp6v0c	ATP6V0C
ENSGMOG00000036495	Atp6v0c	ATP6V0C
ENSGMOG00000009493	Atp6v0d1	ATP6V0D1
ENSGMOG00000029150	Atp6v0e	ATP6V0E1
ENSGMOG00000024703	Atp6v0e2	ATP6V0E2
ENSGMOG00000002483	Atp6v1a	ATP6V1A
ENSGMOG00000015627	Atp6v1a	ATP6V1A
ENSGMOG00000015516	Atp6v1c1	ATP6V1C1
ENSGMOG00000018397	Atp6v1c1	ATP6V1C1
ENSGMOG00000004339	Atp6v1c2	ATP6V1C2
ENSGMOG00000003283	Atp6v1d	ATP6V1D
ENSGMOG00000012925	Atp6v1e1	ATP6V1E1
ENSGMOG00000004959	Atp6v1e1	ATP6V1E1
ENSGMOG00000029852	Atp6v1f	ATP6V1F
ENSGMOG00000022958	Atp6v1g1	ATP6V1G1
ENSGMOG00000017101	Atp6v1h	ATP6V1H
ENSGMOG00000016328	Atp7a	ATP7A
ENSGMOG00000005279	Atp7b	ATP7B
ENSGMOG00000025284	Atp8a1	ATP8A1
ENSGMOG00000016419	Atp8a1	ATP8A1
ENSGMOG00000015425	Atp8a2	ATP8A2
ENSGMOG00000013413	Atp8b1	ATP8B1
ENSGMOG00000005136	Atp8b2	ATP8B2
ENSGMOG00000008846	Atp8b3	ATP8B3
ENSGMOG00000015753	Atp8b5	ATP8B2
ENSGMOG00000003768	Atp9a	ATP9A
ENSGMOG00000013418	Atp9b	ATP9B
ENSGMOG00000029789	Atpaf1	ATPAF1
ENSGMOG00000005553	Atpaf2	ATPAF2
ENSGMOG00000006364	Atpsckmt	ATPSCKMT
ENSGMOG00000012865	Atr	ATR
ENSGMOG00000013100	Atraid	ATRAID
ENSGMOG00000005213	Atrn	ATRN
ENSGMOG00000015734	Atrnl1	ATRNL1
ENSGMOG00000005751	Atrx	ATRX
ENSGMOG00000035426	Atxn1	ATXN1
ENSGMOG00000029028	Atxn1	ATXN1
ENSGMOG00000019268	Atxn10	ATXN10
ENSGMOG00000024406	Atxn1l	ATXN1L
ENSGMOG00000007412	Atxn2	ATXN2
ENSGMOG00000000316	Atxn2l	ATXN2L
ENSGMOG00000006016	Atxn2l	ATXN2L
ENSGMOG00000010381	Atxn3	ATXN3
ENSGMOG00000009122	Atxn7	ATXN7
ENSGMOG00000036916	Atxn7l1	ATXN7L1
ENSGMOG00000035977	Atxn7l2	ATXN7L2
ENSGMOG00000029628	Atxn7l2	ATXN7L2
ENSGMOG00000001199	Atxn7l3	ATXN7L3
ENSGMOG00000001510	Atxn7l3	ATXN7L3
ENSGMOG00000030559	AU021092	C16orf89
ENSGMOG00000004987	AU022252	C1orf50
ENSGMOG00000012803	AU040320	KIAA0319L
ENSGMOG00000029450	Auh	AUH
ENSGMOG00000007912	Aurka	AURKA
ENSGMOG00000019685	Aurkaip1	AURKAIP1
ENSGMOG00000018737	Aurkb	AURKB
ENSGMOG00000028475	Auts2	AUTS2
ENSGMOG00000014913	Aven	AVEN
ENSGMOG00000014522	Avil	AVIL
ENSGMOG00000018242	Avl9	AVL9
ENSGMOG00000033668	Avpr1a	AVPR1A
ENSGMOG00000000855	Avpr1a	AVPR1A
ENSGMOG00000004062	Avpr2	AVPR2
ENSGMOG00000008306	Avpr2	AVPR2
ENSGMOG00000037022	AW209491	C7orf25
ENSGMOG00000036530	Axdnd1	AXDND1
ENSGMOG00000028460	Axin1	AXIN1
ENSGMOG00000002120	Axin2	AXIN2
ENSGMOG00000031244	Axin2	AXIN2
ENSGMOG00000018488	Axl	AXL
ENSGMOG00000003761	Azi2	AZI2
ENSGMOG00000015534	Azin1	AZIN1
ENSGMOG00000018418	Azin1	AZIN1
ENSGMOG00000026008	B230219D22Rik	C5orf24
ENSGMOG00000016267	B230219D22Rik	C5orf24
ENSGMOG00000025165	B3galnt1	B3GALNT1
ENSGMOG00000019751	B3galnt1	B3GALNT1
ENSGMOG00000033713	B3galnt1	B3GALNT1
ENSGMOG00000028565	B3galnt1	B3GALNT1
ENSGMOG00000020462	B3galnt1	B3GALNT1
ENSGMOG00000031077	B3galnt1	B3GALNT1
ENSGMOG00000020511	B3galnt1	B3GALNT1
ENSGMOG00000018722	B3galnt2	B3GALNT2
ENSGMOG00000027045	B3galt1	B3GALT1
ENSGMOG00000022738	B3galt1	B3GALT1
ENSGMOG00000003987	B3galt2	B3GALT2
ENSGMOG00000008726	B3galt2	B3GALT2
ENSGMOG00000022246	B3galt4	B3GALT4
ENSGMOG00000004483	B3galt6	B3GALT6
ENSGMOG00000012122	B3gat1	B3GAT1
ENSGMOG00000013201	B3gat1	B3GAT1
ENSGMOG00000033193	B3gat2	B3GAT2
ENSGMOG00000011019	B3gat3	B3GAT3
ENSGMOG00000010699	B3glct	B3GLCT
ENSGMOG00000020567	B3gnt2	B3GNT2
ENSGMOG00000035226	B3gnt2	B3GNT2
ENSGMOG00000010568	B3gnt3	B3GNT3
ENSGMOG00000014617	B3gnt3	B3GNT3
ENSGMOG00000036068	B3gnt3	B3GNT3
ENSGMOG00000002958	B3gnt5	B3GNT5
ENSGMOG00000027060	B3gnt5	B3GNT5
ENSGMOG00000020110	B3gnt6	B3GNT6
ENSGMOG00000006402	B3gnt6	B3GNT6
ENSGMOG00000005587	B3gnt6	B3GNT6
ENSGMOG00000020111	B3gnt6	B3GNT6
ENSGMOG00000036718	B3gnt6	B3GNT6
ENSGMOG00000029943	B3gnt6	B3GNT6
ENSGMOG00000028218	B3gnt6	B3GNT6
ENSGMOG00000015608	B3gnt6	B3GNT6
ENSGMOG00000027820	B3gnt7	B3GNT7
ENSGMOG00000024448	B3gnt8	B3GNT8
ENSGMOG00000004988	B3gnt9	B3GNT9
ENSGMOG00000013255	B3gntl1	B3GNTL1
ENSGMOG00000007533	B4galnt1	B4GALNT1
ENSGMOG00000004324	B4galnt1	B4GALNT1
ENSGMOG00000030891	B4galnt2	B4GALNT2
ENSGMOG00000036267	B4galnt2	B4GALNT2
ENSGMOG00000001726	B4galnt2	B4GALNT2
ENSGMOG00000001712	B4galnt2	B4GALNT2
ENSGMOG00000033297	B4galnt2	B4GALNT2
ENSGMOG00000032077	B4galnt2	B4GALNT2
ENSGMOG00000002666	B4galnt3	B4GALNT3
ENSGMOG00000005031	B4galt1	B4GALT1
ENSGMOG00000034489	B4galt2	B4GALT2
ENSGMOG00000028945	B4galt3	B4GALT3
ENSGMOG00000002654	B4galt4	B4GALT4
ENSGMOG00000016633	B4galt5	B4GALT5
ENSGMOG00000022899	B4galt6	B4GALT6
ENSGMOG00000014786	B4galt7	B4GALT7
ENSGMOG00000009731	B4gat1	B4GAT1
ENSGMOG00000013934	B9d1	B9D1
ENSGMOG00000019731	B9d2	B9D2
ENSGMOG00000011178	Babam1	BABAM1
ENSGMOG00000001996	Babam2	BABAM2
ENSGMOG00000004067	Bace1	BACE1
ENSGMOG00000008848	Bace2	BACE2
ENSGMOG00000024939	Bach1	BACH1
ENSGMOG00000028766	Bach1	BACH1
ENSGMOG00000036440	Bach2	BACH2
ENSGMOG00000017061	Bag1	BAG1
ENSGMOG00000005117	Bag2	BAG2
ENSGMOG00000032802	Bag3	BAG3
ENSGMOG00000029455	Bag4	BAG4
ENSGMOG00000028560	Bag5	BAG5
ENSGMOG00000017794	Bag6	BAG6
ENSGMOG00000013765	Bag6	BAG6
ENSGMOG00000022803	Bahcc1	BAHCC1
ENSGMOG00000023832	Bahd1	BAHD1
ENSGMOG00000024841	Bahd1	BAHD1
ENSGMOG00000016653	Baiap2	BAIAP2
ENSGMOG00000004389	Baiap2l1	BAIAP2L1
ENSGMOG00000003872	Baiap2l1	BAIAP2L1
ENSGMOG00000022665	Baiap2l2	BAIAP2L2
ENSGMOG00000004506	Baiap3	BAIAP3
ENSGMOG00000002631	Bambi	BAMBI
ENSGMOG00000026313	Banf1	BANF1
ENSGMOG00000032695	Bank1	BANK1
ENSGMOG00000008115	Banp	BANP
ENSGMOG00000010711	Bap1	BAP1
ENSGMOG00000027836	Bard1	BARD1
ENSGMOG00000023408	Barhl1	BARHL1
ENSGMOG00000036115	Barhl2	BARHL2
ENSGMOG00000023980	Barx1	BARX1
ENSGMOG00000029215	Barx2	BARX2
ENSGMOG00000011150	Batf	BATF
ENSGMOG00000011052	Batf2	BATF2
ENSGMOG00000027603	Batf2	BATF2
ENSGMOG00000030152	Bax	BAX
ENSGMOG00000016660	Baz1b	BAZ1B
ENSGMOG00000001100	Baz2a	BAZ2A
ENSGMOG00000027680	Baz2b	BAZ2B
ENSGMOG00000030893	Baz2b	BAZ2B
ENSGMOG00000032316	Bbip1	BBIP1
ENSGMOG00000015993	Bbof1	BBOF1
ENSGMOG00000005325	Bbox1	BBOX1
ENSGMOG00000035425	Bbs1	BBS1
ENSGMOG00000031723	Bbs10	BBS10
ENSGMOG00000031617	Bbs12	BBS12
ENSGMOG00000001381	Bbs2	BBS2
ENSGMOG00000008465	Bbs4	BBS4
ENSGMOG00000002910	Bbs5	BBS5
ENSGMOG00000012717	Bbs7	BBS7
ENSGMOG00000027237	Bbs9	BBS9
ENSGMOG00000033881	Bbx	BBX
ENSGMOG00000009663	BC004004	C6orf89
ENSGMOG00000008492	BC005537	C6orf62
ENSGMOG00000005974	BC005624	C9orf78
ENSGMOG00000033186	BC024978	C19orf54
ENSGMOG00000002391	BC031181	C18orf32
ENSGMOG00000031113	BC034090	KIAA1614
ENSGMOG00000015193	BC055324	C1orf112
ENSGMOG00000013890	Bcam	BCAM
ENSGMOG00000003832	Bcan	BCAN
ENSGMOG00000017017	Bcan	BCAN
ENSGMOG00000018124	Bcap29	BCAP29
ENSGMOG00000013758	Bcap29	BCAP29
ENSGMOG00000010087	Bcap31	BCAP31
ENSGMOG00000007057	Bcar3	BCAR3
ENSGMOG00000014357	Bcas2	BCAS2
ENSGMOG00000002923	Bcas3	BCAS3
ENSGMOG00000009217	Bcat2	BCAT2
ENSGMOG00000026112	Bccip	BCCIP
ENSGMOG00000013101	Bcdin3d	BCDIN3D
ENSGMOG00000034357	Bche	BCHE
ENSGMOG00000015877	Bckdha	BCKDHA
ENSGMOG00000006419	Bckdhb	BCKDHB
ENSGMOG00000009714	Bckdk	BCKDK
ENSGMOG00000025329	Bcl11a	BCL11A
ENSGMOG00000029254	Bcl11b	BCL11B
ENSGMOG00000029862	Bcl2	BCL2
ENSGMOG00000032733	Bcl2	BCL2
ENSGMOG00000025656	Bcl2l1	BCL2L1
ENSGMOG00000028582	Bcl2l1	BCL2L1
ENSGMOG00000035674	Bcl2l12	BCL2L12
ENSGMOG00000004932	Bcl2l13	BCL2L13
ENSGMOG00000034500	Bcl3	BCL3
ENSGMOG00000018097	Bcl6	BCL6
ENSGMOG00000024049	Bcl6	BCL6
ENSGMOG00000013899	Bcl6b	BCL6B
ENSGMOG00000017818	Bcl7a	BCL7A
ENSGMOG00000034402	Bcl7b	BCL7B
ENSGMOG00000016696	Bcl7b	BCL7B
ENSGMOG00000032626	Bcl9	BCL9
ENSGMOG00000034413	Bcl9l	BCL9L
ENSGMOG00000004879	Bco1	BCO1
ENSGMOG00000017352	Bco2	BCO2
ENSGMOG00000014958	Bco2	BCO2
ENSGMOG00000005694	Bco2	BCO2
ENSGMOG00000028396	Bcor	BCOR
ENSGMOG00000002945	Bcr	BCR
ENSGMOG00000004425	Bcr	BCR
ENSGMOG00000012601	Bcs1l	BCS1L
ENSGMOG00000001721	Bdh1	BDH1
ENSGMOG00000009338	Bdh2	BDH2
ENSGMOG00000001150	Bdkrb1	BDKRB1
ENSGMOG00000033812	Bdkrb2	BDKRB2
ENSGMOG00000013432	Bdkrb2	BDKRB2
ENSGMOG00000018674	Bdnf	BDNF
ENSGMOG00000029973	Bdp1	BDP1
ENSGMOG00000019027	Becn1	BECN1
ENSGMOG00000017649	Bend3	BEND3
ENSGMOG00000034752	Bend4	BEND4
ENSGMOG00000006572	Bend5	BEND5
ENSGMOG00000012213	Bend7	BEND7
ENSGMOG00000018081	Best1	BEST1
ENSGMOG00000005811	Best2	BEST2
ENSGMOG00000000720	Best3	BEST3
ENSGMOG00000034885	Bet1	BET1
ENSGMOG00000017512	Bfar	BFAR
ENSGMOG00000036269	Bfsp1	BFSP1
ENSGMOG00000009887	Bfsp2	BFSP2
ENSGMOG00000005613	Bgn	BGN
ENSGMOG00000011133	Bgn	BGN
ENSGMOG00000027898	Bhlha15	BHLHA15
ENSGMOG00000008634	Bhlha9	BHLHA9
ENSGMOG00000014009	Bhlhe22	BHLHE22
ENSGMOG00000019833	Bhlhe23	BHLHE23
ENSGMOG00000022699	Bhlhe40	BHLHE40
ENSGMOG00000031170	Bhlhe40	BHLHE40
ENSGMOG00000030017	Bhlhe41	BHLHE41
ENSGMOG00000007199	Bhmt2	BHMT2
ENSGMOG00000010765	Bhmt2	BHMT2
ENSGMOG00000008411	Bhmt2	BHMT2
ENSGMOG00000018749	Bicc1	BICC1
ENSGMOG00000003795	Bicd1	BICD1
ENSGMOG00000032594	Bicd1	BICD1
ENSGMOG00000034969	Bicd2	BICD2
ENSGMOG00000017305	Bicd2	BICD2
ENSGMOG00000024084	Bicdl1	BICDL1
ENSGMOG00000002575	Bicdl2	BICDL2
ENSGMOG00000031759	Bicra	BICRA
ENSGMOG00000004148	Bicral	BICRAL
ENSGMOG00000013646	Bin1	BIN1
ENSGMOG00000001808	Bin1	BIN1
ENSGMOG00000024770	Bin2	BIN2
ENSGMOG00000004858	Bin2	BIN2
ENSGMOG00000005607	Bin3	BIN3
ENSGMOG00000014934	Birc3	BIRC3
ENSGMOG00000002750	Birc5	BIRC5
ENSGMOG00000000246	Birc6	BIRC6
ENSGMOG00000004041	Bivm	BIVM
ENSGMOG00000020157	Blcap	BLCAP
ENSGMOG00000019066	Blk	BLK
ENSGMOG00000016431	Blm	BLM
ENSGMOG00000010761	Blm	BLM
ENSGMOG00000010827	Blm	BLM
ENSGMOG00000018237	Blmh	BLMH
ENSGMOG00000010236	Blnk	BLNK
ENSGMOG00000036750	Blnk	BLNK
ENSGMOG00000013215	Bloc1s1	BLOC1S1
ENSGMOG00000016397	Bloc1s2	BLOC1S2
ENSGMOG00000023489	Bloc1s3	BLOC1S3
ENSGMOG00000002067	Bloc1s4	BLOC1S4
ENSGMOG00000023177	Bloc1s5	BLOC1S5
ENSGMOG00000015099	Bloc1s6	BLOC1S6
ENSGMOG00000019058	Blvrb	BLVRB
ENSGMOG00000035263	Blzf1	BLZF1
ENSGMOG00000005538	Bmerb1	BMERB1
ENSGMOG00000014319	Bmi1	BMI1
ENSGMOG00000005763	Bmp1	BMP1
ENSGMOG00000010091	Bmp1	BMP1
ENSGMOG00000024803	Bmp10	BMP10
ENSGMOG00000023189	Bmp15	BMP15
ENSGMOG00000036232	Bmp3	BMP3
ENSGMOG00000011206	Bmp4	BMP4
ENSGMOG00000005466	Bmp5	BMP5
ENSGMOG00000000610	Bmp6	BMP6
ENSGMOG00000016691	Bmp7	BMP7
ENSGMOG00000002761	Bmp7	BMP7
ENSGMOG00000015912	Bmper	BMPER
ENSGMOG00000002440	Bmpr1a	BMPR1A
ENSGMOG00000014107	Bmpr1b	BMPR1B
ENSGMOG00000005746	Bmpr1b	BMPR1B
ENSGMOG00000003678	Bmpr2	BMPR2
ENSGMOG00000000718	Bms1	BMS1
ENSGMOG00000000747	Bmt2	BMT2
ENSGMOG00000029903	Bnc1	BNC1
ENSGMOG00000036420	Bnip1	BNIP1
ENSGMOG00000016467	Bnip1	BNIP1
ENSGMOG00000006978	Bnip2	BNIP2
ENSGMOG00000016595	Bnip3	BNIP3
ENSGMOG00000004716	Bnip3l	BNIP3L
ENSGMOG00000018404	Bnip3l	BNIP3L
ENSGMOG00000010371	Bnipl	BNIPL
ENSGMOG00000023057	Bnipl	BNIPL
ENSGMOG00000030670	Boc	BOC
ENSGMOG00000025527	Bod1l	BOD1L1
ENSGMOG00000009892	Bok	BOK
ENSGMOG00000033222	Bola2	BOLA2
ENSGMOG00000002443	Bola3	BOLA3
ENSGMOG00000036776	Boll	BOLL
ENSGMOG00000000569	Bop1	BOP1
ENSGMOG00000018544	Bora	BORA
ENSGMOG00000003418	Borcs5	BORCS5
ENSGMOG00000024796	Borcs6	BORCS6
ENSGMOG00000011250	Borcs7	BORCS7
ENSGMOG00000007484	Borcs8	BORCS8
ENSGMOG00000023831	Bpgm	BPGM
ENSGMOG00000016965	Bphl	BPHL
ENSGMOG00000016133	Bpifc	BPIFC
ENSGMOG00000004965	Bpnt1	BPNT1
ENSGMOG00000029442	Bptf	BPTF
ENSGMOG00000017629	Bptf	BPTF
ENSGMOG00000013747	Braf	BRAF
ENSGMOG00000012362	Brap	BRAP
ENSGMOG00000006129	Brat1	BRAT1
ENSGMOG00000029005	Brca1	BRCA1
ENSGMOG00000009699	Brca2	BRCA2
ENSGMOG00000033531	Brcc3	BRCC3
ENSGMOG00000004586	Brd1	BRD1
ENSGMOG00000024589	Brd1	BRD1
ENSGMOG00000002616	Brd2	BRD2
ENSGMOG00000007204	Brd2	BRD2
ENSGMOG00000016825	Brd9	BRD9
ENSGMOG00000009165	Brf1	BRF1
ENSGMOG00000010027	Brf2	BRF2
ENSGMOG00000025736	Bri3	BRI3
ENSGMOG00000005060	Bri3bp	BRI3BP
ENSGMOG00000029047	Bricd5	BRICD5
ENSGMOG00000012869	Brinp1	BRINP1
ENSGMOG00000034802	Brinp2	BRINP2
ENSGMOG00000035387	Brinp2	BRINP2
ENSGMOG00000009861	Brinp2	BRINP2
ENSGMOG00000008381	Brinp3	BRINP3
ENSGMOG00000002816	Brip1	BRIP1
ENSGMOG00000002425	Brix1	BRIX1
ENSGMOG00000016217	Brk1	BRK1
ENSGMOG00000007053	Brms1l	BRMS1L
ENSGMOG00000008578	Brox	BROX
ENSGMOG00000017543	Brpf1	BRPF1
ENSGMOG00000026487	Brpf3	BRPF3
ENSGMOG00000003399	Brpf3	BRPF3
ENSGMOG00000025653	Brsk2	BRSK2
ENSGMOG00000002447	Brsk2	BRSK2
ENSGMOG00000033322	Brwd1	BRWD1
ENSGMOG00000004732	Brwd3	BRWD3
ENSGMOG00000030443	Bscl2	BSCL2
ENSGMOG00000016402	Bscl2	BSCL2
ENSGMOG00000019221	Bsdc1	BSDC1
ENSGMOG00000008302	Btaf1	BTAF1
ENSGMOG00000008180	Btbd1	BTBD1
ENSGMOG00000008892	Btbd10	BTBD10
ENSGMOG00000002143	Btbd10	BTBD10
ENSGMOG00000018642	Btbd11	BTBD11
ENSGMOG00000001108	Btbd11	BTBD11
ENSGMOG00000033172	Btbd17	BTBD17
ENSGMOG00000008758	Btbd17	BTBD17
ENSGMOG00000012238	Btbd2	BTBD2
ENSGMOG00000022926	Btbd3	BTBD3
ENSGMOG00000018967	Btbd6	BTBD6
ENSGMOG00000009315	Btbd6	BTBD6
ENSGMOG00000010540	Btbd7	BTBD7
ENSGMOG00000010152	Btbd8	BTBD8
ENSGMOG00000003576	Btbd9	BTBD9
ENSGMOG00000030568	Btc	BTC
ENSGMOG00000015507	Btd	BTD
ENSGMOG00000000326	Btf3	BTF3
ENSGMOG00000007246	Btf3	BTF3
ENSGMOG00000018294	Btf3l4	BTF3L4
ENSGMOG00000037023	Btg1	BTG1
ENSGMOG00000012227	Btg3	BTG3
ENSGMOG00000011470	Btk	BTK
ENSGMOG00000015786	Bub1	BUB1
ENSGMOG00000011596	Bub1b	BUB1B
ENSGMOG00000019042	Bub3	BUB3
ENSGMOG00000024947	Bud13	BUD13
ENSGMOG00000009055	Bud23	BUD23
ENSGMOG00000002290	Bud31	BUD31
ENSGMOG00000005672	Bves	BVES
ENSGMOG00000008061	Bysl	BYSL
ENSGMOG00000003853	Bzw1	BZW1
ENSGMOG00000001477	Bzw1	BZW1
ENSGMOG00000013192	Bzw2	BZW2
ENSGMOG00000032137	C030006K11Rik	C8orf82
ENSGMOG00000013911	C1d	C1D
ENSGMOG00000020191	C1galt1c1	C1GALT1C1
ENSGMOG00000024262	C1qa	C1QA
ENSGMOG00000012353	C1qbp	C1QBP
ENSGMOG00000035102	C1qc	C1QC
ENSGMOG00000028175	C1ql1	C1QL1
ENSGMOG00000031902	C1ql2	C1QL2
ENSGMOG00000031744	C1ql3	C1QL3
ENSGMOG00000019705	C1ql3	C1QL3
ENSGMOG00000019789	C1ql4	C1QL4
ENSGMOG00000033636	C1ql4	C1QL4
ENSGMOG00000016723	C1qtnf1	C1QTNF1
ENSGMOG00000006612	C1qtnf12	C1QTNF12
ENSGMOG00000016193	C1qtnf2	C1QTNF2
ENSGMOG00000034088	C1qtnf4	C1QTNF4
ENSGMOG00000029444	C1qtnf4	C1QTNF4
ENSGMOG00000011784	C1qtnf5	C1QTNF5
ENSGMOG00000025835	C1qtnf7	C1QTNF7
ENSGMOG00000014997	C1qtnf9	C1QTNF9B
ENSGMOG00000012196	C2cd2	C2CD2
ENSGMOG00000005489	C2cd2l	C2CD2L
ENSGMOG00000016376	C2cd3	C2CD3
ENSGMOG00000032306	C2cd4a	C2CD4A
ENSGMOG00000031069	C2cd4a	C2CD4A
ENSGMOG00000023519	C2cd4c	C2CD4C
ENSGMOG00000032280	C2cd4c	C2CD4C
ENSGMOG00000002597	C2cd5	C2CD5
ENSGMOG00000026901	C3	C3
ENSGMOG00000012895	C3	C3
ENSGMOG00000010740	C3	C3
ENSGMOG00000028433	C330018D20Rik	C5orf63
ENSGMOG00000033909	C4b	C4B
ENSGMOG00000009420	C4b	C4B
ENSGMOG00000030068	C4b	C4B
ENSGMOG00000023535	C4b	C4B
ENSGMOG00000030904	C5ar1	C5AR1
ENSGMOG00000009978	C6	C6
ENSGMOG00000010005	C7	C7
ENSGMOG00000007702	C7	C7
ENSGMOG00000031010	C77080	KIAA1522
ENSGMOG00000027352	C87436	C2orf42
ENSGMOG00000017195	C8a	C8A
ENSGMOG00000017166	C8b	C8B
ENSGMOG00000008700	C8g	C8G
ENSGMOG00000009198	C9	C9
ENSGMOG00000008102	C9	C9
ENSGMOG00000007544	C9orf72	C9orf72
ENSGMOG00000026706	Caap1	CAAP1
ENSGMOG00000029526	Cab39	CAB39
ENSGMOG00000016958	Cab39l	CAB39L
ENSGMOG00000031892	Cabcoco1	CABCOCO1
ENSGMOG00000011498	Cabin1	CABIN1
ENSGMOG00000024238	Cables1	CABLES1
ENSGMOG00000019557	Cables2	CABLES2
ENSGMOG00000035687	Cables2	CABLES2
ENSGMOG00000015162	Cabp1	CABP1
ENSGMOG00000009986	Cabp1	CABP1
ENSGMOG00000022364	Cabp2	CABP2
ENSGMOG00000013884	Cabp4	CABP4
ENSGMOG00000016848	Cabp5	CABP5
ENSGMOG00000014239	Cabp5	CABP5
ENSGMOG00000034585	Cabp7	CABP7
ENSGMOG00000005187	Cabp7	CABP7
ENSGMOG00000003668	Cacfd1	CACFD1
ENSGMOG00000013506	Cachd1	CACHD1
ENSGMOG00000031994	Cacna1a	CACNA1A
ENSGMOG00000030232	Cacna1b	CACNA1B
ENSGMOG00000004596	Cacna1b	CACNA1B
ENSGMOG00000016407	Cacna1c	CACNA1C
ENSGMOG00000014162	Cacna1d	CACNA1D
ENSGMOG00000017493	Cacna1d	CACNA1D
ENSGMOG00000013994	Cacna1e	CACNA1E
ENSGMOG00000002325	Cacna1e	CACNA1E
ENSGMOG00000001806	Cacna1f	CACNA1F
ENSGMOG00000010343	Cacna1g	CACNA1G
ENSGMOG00000030564	Cacna1h	CACNA1H
ENSGMOG00000026396	Cacna1i	CACNA1I
ENSGMOG00000006823	Cacna1s	CACNA1S
ENSGMOG00000016019	Cacna1s	CACNA1S
ENSGMOG00000018874	Cacna2d1	CACNA2D1
ENSGMOG00000019325	Cacna2d1	CACNA2D1
ENSGMOG00000009549	Cacna2d2	CACNA2D2
ENSGMOG00000011163	Cacna2d3	CACNA2D3
ENSGMOG00000017604	Cacna2d3	CACNA2D3
ENSGMOG00000012957	Cacna2d4	CACNA2D4
ENSGMOG00000003800	Cacna2d4	CACNA2D4
ENSGMOG00000005267	Cacnb1	CACNB1
ENSGMOG00000005230	Cacnb2	CACNB2
ENSGMOG00000008288	Cacnb3	CACNB3
ENSGMOG00000009603	Cacnb3	CACNB3
ENSGMOG00000013002	Cacnb4	CACNB4
ENSGMOG00000024395	Cacng1	CACNG1
ENSGMOG00000004619	Cacng1	CACNG1
ENSGMOG00000009126	Cacng2	CACNG2
ENSGMOG00000010105	Cacng3	CACNG3
ENSGMOG00000034108	Cacng4	CACNG4
ENSGMOG00000014651	Cacng5	CACNG5
ENSGMOG00000035294	Cacng5	CACNG5
ENSGMOG00000030170	Cacng6	CACNG6
ENSGMOG00000004581	Cacng7	CACNG7
ENSGMOG00000035241	Cacng8	CACNG8
ENSGMOG00000012251	Cactin	CACTIN
ENSGMOG00000005731	Cacul1	CACUL1
ENSGMOG00000012621	Cacybp	CACYBP
ENSGMOG00000015332	Cad	CAD
ENSGMOG00000031628	Cadm1	CADM1
ENSGMOG00000010500	Cadm1	CADM1
ENSGMOG00000006499	Cadm2	CADM2
ENSGMOG00000002155	Cadm2	CADM2
ENSGMOG00000014134	Cadm4	CADM4
ENSGMOG00000017240	Cadps	CADPS
ENSGMOG00000008765	Cadps	CADPS
ENSGMOG00000035623	Cadps2	CADPS2
ENSGMOG00000003058	Calb2	CALB2
ENSGMOG00000019544	Calb2	CALB2
ENSGMOG00000022359	Calcb	CALCB
ENSGMOG00000017839	Calcoco1	CALCOCO1
ENSGMOG00000003213	Calcoco2	CALCOCO2
ENSGMOG00000002241	Calcr	CALCR
ENSGMOG00000003519	Calcrl	CALCRL
ENSGMOG00000028711	Cald1	CALD1
ENSGMOG00000033306	Calhm1	CALHM1
ENSGMOG00000017930	Calhm2	CALHM2
ENSGMOG00000017916	Calhm3	CALHM3
ENSGMOG00000007051	Calhm5	CALHM5
ENSGMOG00000007041	Calhm6	CALHM6
ENSGMOG00000035072	Calm2	CALM2
ENSGMOG00000019151	Calm3	CALM2
ENSGMOG00000008451	Calml4	CALML4
ENSGMOG00000014352	Calr	CALR
ENSGMOG00000002271	Calu	CALU
ENSGMOG00000012302	Calu	CALU
ENSGMOG00000016883	Camk1	CAMK1
ENSGMOG00000010199	Camk1d	CAMK1D
ENSGMOG00000025256	Camk1d	CAMK1D
ENSGMOG00000011962	Camk1g	CAMK1G
ENSGMOG00000003562	Camk1g	CAMK1G
ENSGMOG00000005402	Camk2b	CAMK2B
ENSGMOG00000029228	Camk2b	CAMK2B
ENSGMOG00000012386	Camk2d	CAMK2D
ENSGMOG00000000689	Camk2d	CAMK2D
ENSGMOG00000017548	Camk2g	CAMK2G
ENSGMOG00000019383	Camk2n1	CAMK2N1
ENSGMOG00000001469	Camk4	CAMK4
ENSGMOG00000012343	Camkk1	CAMKK1
ENSGMOG00000016303	Camkk1	CAMKK1
ENSGMOG00000030333	Camkmt	CAMKMT
ENSGMOG00000002479	Camkv	CAMKV
ENSGMOG00000016426	Camkv	CAMKV
ENSGMOG00000022625	Caml	CAMLG
ENSGMOG00000030207	Camsap1	CAMSAP1
ENSGMOG00000022832	Camsap1	CAMSAP1
ENSGMOG00000001030	Camsap2	CAMSAP2
ENSGMOG00000033486	Camsap2	CAMSAP2
ENSGMOG00000009210	Camsap3	CAMSAP3
ENSGMOG00000034652	Camta1	CAMTA1
ENSGMOG00000017650	Camta2	CAMTA2
ENSGMOG00000000250	Cand1	CAND1
ENSGMOG00000036855	Cant1	CANT1
ENSGMOG00000001868	Canx	CANX
ENSGMOG00000015918	Cap1	CAP1
ENSGMOG00000010398	Cap2	CAP2
ENSGMOG00000007742	Capg	CAPG
ENSGMOG00000012126	Capn1	CAPN1
ENSGMOG00000012034	Capn10	CAPN10
ENSGMOG00000016985	Capn11	CAPN11
ENSGMOG00000032775	Capn15	CAPN15
ENSGMOG00000000264	Capn2	CAPN2
ENSGMOG00000018340	Capn2	CAPN2
ENSGMOG00000000251	Capn2	CAPN2
ENSGMOG00000000192	Capn3	CAPN3
ENSGMOG00000013176	Capn3	CAPN3
ENSGMOG00000014423	Capn5	CAPN5
ENSGMOG00000011259	Capn5	CAPN5
ENSGMOG00000003178	Capn6	CAPN6
ENSGMOG00000009660	Capn7	CAPN7
ENSGMOG00000005292	Capn9	CAPN9
ENSGMOG00000005925	Capns1	CAPNS1
ENSGMOG00000011247	Capns1	CAPNS1
ENSGMOG00000007927	Capns2	CAPNS2
ENSGMOG00000002853	Caprin1	CAPRIN1
ENSGMOG00000008955	Caprin1	CAPRIN1
ENSGMOG00000023874	Caprin2	CAPRIN2
ENSGMOG00000019290	Capsl	CAPSL
ENSGMOG00000003328	Capza2	CAPZA2
ENSGMOG00000017189	Capza2	CAPZA2
ENSGMOG00000013681	Capza3	CAPZA3
ENSGMOG00000008088	Capzb	CAPZB
ENSGMOG00000009194	Car10	CA10
ENSGMOG00000036829	Car11	CA11
ENSGMOG00000015697	Car11	CA11
ENSGMOG00000008322	Car12	CA12
ENSGMOG00000008551	Car14	CA14
ENSGMOG00000031274	Car15	CA4
ENSGMOG00000001412	Car15	CA4
ENSGMOG00000013920	Car4	CA4
ENSGMOG00000006009	Car4	CA4
ENSGMOG00000016273	Car4	CA4
ENSGMOG00000004153	Car5b	CA5B
ENSGMOG00000003904	Car6	CA6
ENSGMOG00000001295	Car7	CA7
ENSGMOG00000013905	Car8	CA8
ENSGMOG00000034365	Card10	CARD10
ENSGMOG00000010061	Card10	CARD10
ENSGMOG00000014078	Card10	CARD10
ENSGMOG00000019088	Card14	CARD14
ENSGMOG00000003498	Carhsp1	CARHSP1
ENSGMOG00000009257	Carm1	CARM1
ENSGMOG00000019464	Carmil1	CARMIL1
ENSGMOG00000011135	Carmil1	CARMIL1
ENSGMOG00000012889	Carmil3	CARMIL3
ENSGMOG00000000568	Carmil3	CARMIL3
ENSGMOG00000016586	Carnmt1	CARNMT1
ENSGMOG00000014942	Cars	CARS1
ENSGMOG00000005007	Cars2	CARS2
ENSGMOG00000012049	Cartpt	CARTPT
ENSGMOG00000006708	Casc1	DNAI7
ENSGMOG00000027781	Casc3	CASC3
ENSGMOG00000013501	Casd1	CASD1
ENSGMOG00000014073	Cask	CASK
ENSGMOG00000031379	Cask	CASK
ENSGMOG00000027811	Cask	CASK
ENSGMOG00000025192	Caskin1	CASKIN1
ENSGMOG00000014552	Caskin2	CASKIN2
ENSGMOG00000028083	Caskin2	CASKIN2
ENSGMOG00000025016	Casp1	CASP1
ENSGMOG00000027381	Casp1	CASP1
ENSGMOG00000030246	Casp1	CASP1
ENSGMOG00000034524	Casp1	CASP1
ENSGMOG00000032452	Casp1	CASP1
ENSGMOG00000022644	Casp1	CASP1
ENSGMOG00000034173	Casp12	CASP12
ENSGMOG00000024183	Casp14	CASP14
ENSGMOG00000011091	Casp2	CASP2
ENSGMOG00000001008	Casp3	CASP3
ENSGMOG00000016710	Casp3	CASP3
ENSGMOG00000033551	Casp3	CASP3
ENSGMOG00000035959	Casp3	CASP3
ENSGMOG00000037099	Casp4	CASP4
ENSGMOG00000018553	Casp4	CASP4
ENSGMOG00000011831	Casp4	CASP4
ENSGMOG00000011901	Casp4	CASP4
ENSGMOG00000030193	Casp6	CASP6
ENSGMOG00000017291	Casp6	CASP6
ENSGMOG00000026188	Casp6	CASP6
ENSGMOG00000005542	Casp7	CASP7
ENSGMOG00000016718	Casp9	CASP9
ENSGMOG00000015204	Casq1	CASQ1
ENSGMOG00000015913	Casq1	CASQ1
ENSGMOG00000011071	Casq2	CASQ2
ENSGMOG00000002672	Casr	CASR
ENSGMOG00000036449	Cass4	CASS4
ENSGMOG00000008928	Cast	CAST
ENSGMOG00000017310	Castor2	CASTOR2
ENSGMOG00000005683	Cat	CAT
ENSGMOG00000025349	Cat	CAT
ENSGMOG00000036210	Cat	CAT
ENSGMOG00000008471	Catip	CATIP
ENSGMOG00000027424	Cav1	CAV1
ENSGMOG00000011408	Cav2	CAV2
ENSGMOG00000007891	Cav3	CAV3
ENSGMOG00000025922	Cavin1	CAVIN1
ENSGMOG00000024116	Cavin1	CAVIN1
ENSGMOG00000000913	Cavin3	CAVIN3
ENSGMOG00000025956	Cavin3	CAVIN3
ENSGMOG00000023033	Cavin4	CAVIN4
ENSGMOG00000010417	Cavin4	CAVIN4
ENSGMOG00000036457	Cbarp	CBARP
ENSGMOG00000034558	Cbarp	CBARP
ENSGMOG00000000777	Cbfa2t2	CBFA2T2
ENSGMOG00000001484	Cbfa2t3	CBFA2T3
ENSGMOG00000005035	Cbfb	CBFB
ENSGMOG00000009654	Cbl	CBL
ENSGMOG00000011805	Cbl	CBL
ENSGMOG00000017936	Cblb	CBLB
ENSGMOG00000035715	Cbll1	CBLL1
ENSGMOG00000026039	Cbln1	CBLN1
ENSGMOG00000007213	Cbln2	CBLN2
ENSGMOG00000008085	Cbln3	CBLN3
ENSGMOG00000031922	Cbln3	CBLN3
[truncated: 13,497 more rows]

## Sheet: Atlantic cod to Zebrafish
At.cod gene	Zebrafish gene
ENSGMOG00000000005	pou2f3
ENSGMOG00000000006	tiprl
ENSGMOG00000000007	KCNJ6
ENSGMOG00000000009	yif1b
ENSGMOG00000000010	csmd2
ENSGMOG00000000012	plxnb1a
ENSGMOG00000000014	cct8
ENSGMOG00000000016	ppp3ccb
ENSGMOG00000000018	hpse
ENSGMOG00000000020	helq
ENSGMOG00000000021	nup93
ENSGMOG00000000022	tph1b
ENSGMOG00000000023	abraxas1
ENSGMOG00000000024	plvapb
ENSGMOG00000000025	nt5dc1
ENSGMOG00000000028	pgm2
ENSGMOG00000000029	sult2st1
ENSGMOG00000000032	tbc1d1
ENSGMOG00000000035	gpr142
ENSGMOG00000000036	map2k6
ENSGMOG00000000037	dock3
ENSGMOG00000000038	eif4g3a
ENSGMOG00000000042	si:ch211-173p18.3
ENSGMOG00000000044	hp1bp3
ENSGMOG00000000045	gne
ENSGMOG00000000046	ino80c
ENSGMOG00000000047	arhgap35b
ENSGMOG00000000048	sh2d5
ENSGMOG00000000049	si:rp71-17i16.5
ENSGMOG00000000050	clta
ENSGMOG00000000051	myo1ca
ENSGMOG00000000053	galnt1
ENSGMOG00000000054	nansb
ENSGMOG00000000056	tmem245
ENSGMOG00000000060	pfkfb2b
ENSGMOG00000000061	dnajc7
ENSGMOG00000000062	frrs1l
ENSGMOG00000000063	xpa
ENSGMOG00000000064	atp11a
ENSGMOG00000000067	kpna7
ENSGMOG00000000068	ttc25
ENSGMOG00000000069	thoc2
ENSGMOG00000000070	phtf1
ENSGMOG00000000073	gpd1l
ENSGMOG00000000074	si:dkey-238d18.5
ENSGMOG00000000076	si:dkey-238d18.4
ENSGMOG00000000079	gabra6b
ENSGMOG00000000080	ctrl
ENSGMOG00000000082	tbc1d9
ENSGMOG00000000083	lin37
ENSGMOG00000000088	fkbp10a
ENSGMOG00000000091	rnf130
ENSGMOG00000000096	zgc:77056
ENSGMOG00000000097	lect2l
ENSGMOG00000000098	p3h4
ENSGMOG00000000099	rprd1a
ENSGMOG00000000100	zdhhc3a
ENSGMOG00000000105	SPDEF
ENSGMOG00000000107	f2
ENSGMOG00000000108	pacsin1b
ENSGMOG00000000110	tlr22
ENSGMOG00000000113	rps10
ENSGMOG00000000115	si:dkey-208k4.2
ENSGMOG00000000117	krt18a.1
ENSGMOG00000000118	nfyc
ENSGMOG00000000122	rln1
ENSGMOG00000000123	igflr1
ENSGMOG00000000124	kcnq4
ENSGMOG00000000125	gsdf
ENSGMOG00000000126	aplp1
ENSGMOG00000000128	fbxl20
ENSGMOG00000000129	fnbp1b
ENSGMOG00000000132	sh3kbp1
ENSGMOG00000000133	cdk12
ENSGMOG00000000134	egln2
ENSGMOG00000000135	zmp:0000001114
ENSGMOG00000000137	crb2b
ENSGMOG00000000138	kirrel3l
ENSGMOG00000000139	slc8a4b
ENSGMOG00000000140	map3k15
ENSGMOG00000000142	slc29a1b
ENSGMOG00000000146	kpnb3
ENSGMOG00000000148	dph3
ENSGMOG00000000151	zic2b
ENSGMOG00000000153	fhl2b
ENSGMOG00000000154	ces2a
ENSGMOG00000000155	nck2a
ENSGMOG00000000158	reck
ENSGMOG00000000160	hsd17b7
ENSGMOG00000000161	ubac1
ENSGMOG00000000163	nmbr
ENSGMOG00000000164	pcca
ENSGMOG00000000166	stambpl1
ENSGMOG00000000171	ttbk2b
ENSGMOG00000000172	stard3
ENSGMOG00000000173	phf19
ENSGMOG00000000175	lrrc28
ENSGMOG00000000176	churc1
ENSGMOG00000000177	acvr1l
ENSGMOG00000000178	atp6v1ba
ENSGMOG00000000180	zgc:91968
ENSGMOG00000000181	igf1rb
ENSGMOG00000000184	vclb
ENSGMOG00000000186	itgb3a
ENSGMOG00000000188	zgc:158328
ENSGMOG00000000189	sptbn1
ENSGMOG00000000192	capn3b
ENSGMOG00000000193	mettl2a
ENSGMOG00000000194	adkb
ENSGMOG00000000198	tlk2
ENSGMOG00000000199	slc18a2
ENSGMOG00000000201	EML6
ENSGMOG00000000202	kat6b
ENSGMOG00000000204	nrbp1
ENSGMOG00000000206	polr3f
ENSGMOG00000000207	rbbp9
ENSGMOG00000000208	mrc2
ENSGMOG00000000209	pdzd8
ENSGMOG00000000211	ehd2a
ENSGMOG00000000212	si:dkey-12h9.6
ENSGMOG00000000215	CABZ01093429.1
ENSGMOG00000000216	edaradd
ENSGMOG00000000218	rhag
ENSGMOG00000000221	mtif2
ENSGMOG00000000222	deaf1
ENSGMOG00000000225	PRLHR
ENSGMOG00000000226	dnaaf1
ENSGMOG00000000227	erbb4b
ENSGMOG00000000230	gpr184
ENSGMOG00000000231	sde2
ENSGMOG00000000235	exo1
ENSGMOG00000000237	nek2
ENSGMOG00000000239	tmem222b
ENSGMOG00000000241	lpgat1
ENSGMOG00000000242	yipf4
ENSGMOG00000000243	cps1
ENSGMOG00000000244	ap4m1
ENSGMOG00000000246	birc6
ENSGMOG00000000247	dlg5b.1
ENSGMOG00000000248	ints7
ENSGMOG00000000250	cand1
ENSGMOG00000000251	capn2b
ENSGMOG00000000254	arhgef28a
ENSGMOG00000000255	dtl
ENSGMOG00000000258	vamp3
ENSGMOG00000000261	mxra8a
ENSGMOG00000000264	capn2l
ENSGMOG00000000265	slc6a1l
ENSGMOG00000000266	clk4a
ENSGMOG00000000267	myl1
ENSGMOG00000000268	ppp2r5a
ENSGMOG00000000273	ppifb
ENSGMOG00000000274	aars2
ENSGMOG00000000280	tmem163a
ENSGMOG00000000286	heg1
ENSGMOG00000000287	fgl2a
ENSGMOG00000000288	mbd2
ENSGMOG00000000290	alg13
ENSGMOG00000000291	polr3a
ENSGMOG00000000292	zgc:109986
ENSGMOG00000000295	atp6v0b
ENSGMOG00000000297	si:dkey-222b8.1
ENSGMOG00000000301	pdhb
ENSGMOG00000000303	slc12a8
ENSGMOG00000000309	adamts14
ENSGMOG00000000310	spns1
ENSGMOG00000000312	ccne1
ENSGMOG00000000316	atxn2l
ENSGMOG00000000317	ankra2
ENSGMOG00000000318	cyp1a
ENSGMOG00000000319	zgc:162297
ENSGMOG00000000320	znf148
ENSGMOG00000000321	pald1a
ENSGMOG00000000324	nfatc2ip
ENSGMOG00000000325	vps37a
ENSGMOG00000000326	btf3
ENSGMOG00000000327	plekhf1
ENSGMOG00000000328	sgf29
ENSGMOG00000000330	foxd1
ENSGMOG00000000335	pop4
ENSGMOG00000000337	fcho2
ENSGMOG00000000338	lrrc20
ENSGMOG00000000339	ppa1a
ENSGMOG00000000341	tpcn2
ENSGMOG00000000342	lrrc45
ENSGMOG00000000346	si:dkey-159a18.1
ENSGMOG00000000347	tnpo1
ENSGMOG00000000351	asmt
ENSGMOG00000000352	fam3c
ENSGMOG00000000355	slc13a4
ENSGMOG00000000357	nadsyn1
ENSGMOG00000000358	iba57
ENSGMOG00000000359	slc7a14a
ENSGMOG00000000360	ascc1
ENSGMOG00000000362	akap17a
ENSGMOG00000000364	si:ch211-51c14.1
ENSGMOG00000000365	dcxr
ENSGMOG00000000368	jmjd4
ENSGMOG00000000372	dhcr7
ENSGMOG00000000374	rfng
ENSGMOG00000000375	si:dkeyp-117b8.4
ENSGMOG00000000376	chrnb3a
ENSGMOG00000000377	ddit4
ENSGMOG00000000380	snap47
ENSGMOG00000000383	dnah7
ENSGMOG00000000384	dnajb12b
ENSGMOG00000000387	wnt9a
ENSGMOG00000000389	rapgef2
ENSGMOG00000000392	skap2
ENSGMOG00000000393	vipr1b
ENSGMOG00000000394	supt3h
ENSGMOG00000000397	plcb3
ENSGMOG00000000400	farp1
ENSGMOG00000000401	steap4
ENSGMOG00000000402	gmpr
ENSGMOG00000000404	edar
ENSGMOG00000000405	pcnp
ENSGMOG00000000406	sec31b
ENSGMOG00000000407	cdc5l
ENSGMOG00000000408	si:dkey-34e4.1
ENSGMOG00000000409	zgc:153896
ENSGMOG00000000410	LO018422.1
ENSGMOG00000000413	tp63
ENSGMOG00000000416	cdk11b
ENSGMOG00000000417	stk16
ENSGMOG00000000420	steap4
ENSGMOG00000000421	atic
ENSGMOG00000000422	hgh1
ENSGMOG00000000424	nus1
ENSGMOG00000000425	zgc:65851
ENSGMOG00000000427	CABZ01071848.1
ENSGMOG00000000428	si:dkey-242h9.3
ENSGMOG00000000429	arf1
ENSGMOG00000000430	napba
ENSGMOG00000000434	ndufb8
ENSGMOG00000000435	MMP23B
ENSGMOG00000000436	fn1b
ENSGMOG00000000437	uvssa
ENSGMOG00000000440	adam19a
ENSGMOG00000000441	si:dkeyp-114g9.1
ENSGMOG00000000444	CDPF1
ENSGMOG00000000445	gpx9
ENSGMOG00000000446	fxr1
ENSGMOG00000000448	PLCB1
ENSGMOG00000000449	ubiad1
ENSGMOG00000000450	BX663503.3
ENSGMOG00000000454	gabrr2b
ENSGMOG00000000457	fbxl15
ENSGMOG00000000458	SHKBP1
ENSGMOG00000000459	mib2
ENSGMOG00000000460	lamc3
ENSGMOG00000000463	pax2b
ENSGMOG00000000466	tmem244
ENSGMOG00000000467	man1a1
ENSGMOG00000000469	esyt3
ENSGMOG00000000470	chst3b
ENSGMOG00000000471	chrnb3b
ENSGMOG00000000472	KCNIP4
ENSGMOG00000000473	dnajc19
ENSGMOG00000000475	chmp2ba
ENSGMOG00000000481	mtif3
ENSGMOG00000000482	trim2a
ENSGMOG00000000483	immt
ENSGMOG00000000484	pdgfc
ENSGMOG00000000487	si:ch211-225b11.1
ENSGMOG00000000488	PARL
ENSGMOG00000000489	pou1f1
ENSGMOG00000000492	tvp23b
ENSGMOG00000000495	CABZ01113599.1
ENSGMOG00000000498	CABZ01097761.1
ENSGMOG00000000500	exoc7
ENSGMOG00000000501	psmd14
ENSGMOG00000000502	il16
ENSGMOG00000000504	mc4r
ENSGMOG00000000506	cox7c
ENSGMOG00000000508	magt1
ENSGMOG00000000509	cldn15lb
ENSGMOG00000000511	mak16
ENSGMOG00000000513	rasa1a
ENSGMOG00000000518	slc7a9
ENSGMOG00000000519	exoc6b
ENSGMOG00000000520	slc9a3r1a
ENSGMOG00000000521	atg16l1
ENSGMOG00000000524	kdelr3
ENSGMOG00000000525	rbms1a
ENSGMOG00000000526	tardbpl
ENSGMOG00000000527	si:ch211-175m2.5
ENSGMOG00000000528	rp9
ENSGMOG00000000536	arhgap12a
ENSGMOG00000000538	xbp1
ENSGMOG00000000539	arfip1
ENSGMOG00000000540	zgc:91910
ENSGMOG00000000541	uggt1
ENSGMOG00000000542	ccnh
ENSGMOG00000000546	bmp8a
ENSGMOG00000000548	eef1g
ENSGMOG00000000549	mn1b
ENSGMOG00000000551	itgb6
ENSGMOG00000000552	fam193a
ENSGMOG00000000553	zgc:152951
ENSGMOG00000000554	kif1b
ENSGMOG00000000557	tmem161b
ENSGMOG00000000563	knl1
ENSGMOG00000000564	stard5
ENSGMOG00000000565	mef2cb
ENSGMOG00000000566	pla2r1
ENSGMOG00000000567	zp3e
ENSGMOG00000000569	bop1
ENSGMOG00000000570	C9H3orf38
ENSGMOG00000000571	slc6a22.2
ENSGMOG00000000573	acmsd
ENSGMOG00000000574	si:dkey-15b23.3
ENSGMOG00000000575	plcd3b
ENSGMOG00000000576	scg2b
ENSGMOG00000000577	vldlr
ENSGMOG00000000578	TTC28
ENSGMOG00000000579	shisa9a
ENSGMOG00000000581	arhgap19
ENSGMOG00000000582	slc10a1
ENSGMOG00000000584	cpped1
ENSGMOG00000000585	rnf217
ENSGMOG00000000587	sp3b
ENSGMOG00000000588	zgc:101569
ENSGMOG00000000589	rida
ENSGMOG00000000590	hnmt
ENSGMOG00000000591	ly75
ENSGMOG00000000592	atf7b
ENSGMOG00000000593	tnip2
ENSGMOG00000000594	rhobtb1
ENSGMOG00000000596	hsf1
ENSGMOG00000000600	pfdn5
ENSGMOG00000000601	zgc:171776
ENSGMOG00000000603	ercc4
ENSGMOG00000000605	rhobtb4
ENSGMOG00000000608	ola1
ENSGMOG00000000609	LTN1
ENSGMOG00000000610	bmp6
ENSGMOG00000000611	zgc:171776
ENSGMOG00000000612	espl1
ENSGMOG00000000614	sfrp2
ENSGMOG00000000616	tap2t
ENSGMOG00000000619	wdr54
ENSGMOG00000000621	si:dkey-30k22.7
ENSGMOG00000000622	acbd4
ENSGMOG00000000623	ube4b
ENSGMOG00000000624	txndc5
ENSGMOG00000000630	znfx1
ENSGMOG00000000631	slc41a2b
ENSGMOG00000000632	mrtfba
ENSGMOG00000000635	apmap
ENSGMOG00000000637	nol6
ENSGMOG00000000641	irx5b
ENSGMOG00000000644	pxdn
ENSGMOG00000000648	eef1e1
ENSGMOG00000000650	klhl17
ENSGMOG00000000652	slc35b3
ENSGMOG00000000654	nmnat1-rbp7a
ENSGMOG00000000657	spp2
ENSGMOG00000000659	pop1
ENSGMOG00000000661	irgf3
ENSGMOG00000000662	smim7
ENSGMOG00000000663	tmem135
ENSGMOG00000000664	plrg1
ENSGMOG00000000666	spdl1
ENSGMOG00000000668	pgpep1
ENSGMOG00000000670	tmem38a
ENSGMOG00000000673	lzic
ENSGMOG00000000674	CABZ01077956.1
ENSGMOG00000000677	aqp3a
ENSGMOG00000000679	CABZ01067581.1
ENSGMOG00000000681	mapk9
ENSGMOG00000000682	cops8
ENSGMOG00000000683	slc22a31
ENSGMOG00000000684	itgb7
ENSGMOG00000000685	rab3ab
ENSGMOG00000000687	fgg
ENSGMOG00000000688	clstn1
ENSGMOG00000000689	camk2d2
ENSGMOG00000000690	mlsl
ENSGMOG00000000693	alg11
ENSGMOG00000000694	pde4ca
ENSGMOG00000000695	hephl1b
ENSGMOG00000000699	furina
ENSGMOG00000000703	dpep1
ENSGMOG00000000704	npy2r
ENSGMOG00000000705	tfap2a
ENSGMOG00000000707	cpb2
ENSGMOG00000000710	serpini1
ENSGMOG00000000711	fam102aa
ENSGMOG00000000712	fes
ENSGMOG00000000713	ctnnbip1
ENSGMOG00000000715	tbc1d20
ENSGMOG00000000716	rsph14
ENSGMOG00000000717	tmem14ca
ENSGMOG00000000718	bms1
ENSGMOG00000000719	eipr1
ENSGMOG00000000721	col6a3
ENSGMOG00000000722	pik3cd
ENSGMOG00000000725	pdcd10a
ENSGMOG00000000728	mak
ENSGMOG00000000729	pdlim3a
ENSGMOG00000000730	cnot6l
ENSGMOG00000000731	tmem168b
ENSGMOG00000000732	zgc:154054
ENSGMOG00000000734	nsmce1
ENSGMOG00000000735	nudt18
ENSGMOG00000000736	slc43a2b
ENSGMOG00000000738	rbck1
ENSGMOG00000000741	mpnd
ENSGMOG00000000742	ctdp1
ENSGMOG00000000745	mrpl1
ENSGMOG00000000746	plcxd2
ENSGMOG00000000747	bmt2
ENSGMOG00000000748	hdac5
ENSGMOG00000000751	pitpnaa
ENSGMOG00000000752	aox6
ENSGMOG00000000755	aclyb
ENSGMOG00000000757	TBC1D8
ENSGMOG00000000758	foxp2
ENSGMOG00000000759	necab3
ENSGMOG00000000764	sh3gl1b
ENSGMOG00000000765	yaf2
ENSGMOG00000000767	pi15b
ENSGMOG00000000769	lamb1a
ENSGMOG00000000770	inpp5kb
ENSGMOG00000000771	CABZ01072254.1
ENSGMOG00000000772	adck5
ENSGMOG00000000774	si:ch211-272n13.3
ENSGMOG00000000775	rhcga
ENSGMOG00000000776	focad
ENSGMOG00000000777	cbfa2t2
ENSGMOG00000000779	rorca
ENSGMOG00000000781	wdsub1
ENSGMOG00000000782	olah
ENSGMOG00000000783	nle1
ENSGMOG00000000784	cox16
ENSGMOG00000000787	lrrc8c
ENSGMOG00000000789	YTHDC2
ENSGMOG00000000790	PDCL3
ENSGMOG00000000791	nr2f1a
ENSGMOG00000000793	STX3
ENSGMOG00000000794	mtfmt
ENSGMOG00000000795	lars2
ENSGMOG00000000796	cpsf1
ENSGMOG00000000798	fam172a
ENSGMOG00000000800	anxa2b
ENSGMOG00000000801	SNTA1
ENSGMOG00000000802	si:ch73-265h17.1
ENSGMOG00000000803	pik3r3b
ENSGMOG00000000804	hapln1b
ENSGMOG00000000805	kdm2aa
ENSGMOG00000000808	KYAT3
ENSGMOG00000000809	slc25a1a
ENSGMOG00000000810	si:ch211-71n6.4
ENSGMOG00000000811	fat1a
ENSGMOG00000000812	cntn1a
ENSGMOG00000000815	tox2
ENSGMOG00000000817	cdhr5b
ENSGMOG00000000818	smarcc2
ENSGMOG00000000824	rack1
ENSGMOG00000000827	mhc1zea
ENSGMOG00000000828	lmo4b
ENSGMOG00000000830	kctd14
ENSGMOG00000000832	mcm3
ENSGMOG00000000833	ubr2
ENSGMOG00000000835	hs2st1b
ENSGMOG00000000836	nme5
ENSGMOG00000000838	rps3
ENSGMOG00000000840	sec23a
ENSGMOG00000000841	etaa1
ENSGMOG00000000842	hpn
ENSGMOG00000000843	HACD4
ENSGMOG00000000844	gpha2
ENSGMOG00000000845	trappc12
ENSGMOG00000000847	hnrnpaba
ENSGMOG00000000849	klc1a
ENSGMOG00000000852	trmt10a
ENSGMOG00000000854	schip1
ENSGMOG00000000856	si:ch211-251b21.1
ENSGMOG00000000859	cdc40
ENSGMOG00000000860	ppm1h
ENSGMOG00000000861	nab1a
ENSGMOG00000000862	slf1
ENSGMOG00000000864	ptprsa
ENSGMOG00000000865	phykpl
ENSGMOG00000000866	slc1a1
ENSGMOG00000000867	frg1
ENSGMOG00000000868	tsfm
ENSGMOG00000000869	srsf5a
ENSGMOG00000000871	clec3ba
ENSGMOG00000000872	FEZ2
ENSGMOG00000000874	endou
ENSGMOG00000000875	gria4b
ENSGMOG00000000876	asah1b
ENSGMOG00000000877	mon2
ENSGMOG00000000880	ttc39b
ENSGMOG00000000881	FP103009.1
ENSGMOG00000000882	RAP1GDS1
ENSGMOG00000000883	dnajc10
ENSGMOG00000000884	cep131
ENSGMOG00000000885	rab33ba
ENSGMOG00000000886	SLCO3A1
ENSGMOG00000000889	ubxn11
ENSGMOG00000000890	mctp1a
ENSGMOG00000000891	synj2bp
ENSGMOG00000000893	lrch2
ENSGMOG00000000894	lgals3a
ENSGMOG00000000895	tspan5b
ENSGMOG00000000896	pcm1
ENSGMOG00000000899	GMEB2
ENSGMOG00000000901	ctbp1
ENSGMOG00000000902	n6amt1
ENSGMOG00000000903	cep85
ENSGMOG00000000904	gnsa
ENSGMOG00000000906	wdr19
ENSGMOG00000000910	frem1a
ENSGMOG00000000911	spon2a
ENSGMOG00000000912	il13ra2
ENSGMOG00000000913	cavin2b
ENSGMOG00000000914	fam81b
ENSGMOG00000000915	rpgrip1
ENSGMOG00000000916	lamtor3
ENSGMOG00000000920	plg
ENSGMOG00000000922	tbxa2r
ENSGMOG00000000923	aspscr1
ENSGMOG00000000925	kdm3b
ENSGMOG00000000926	alg8
ENSGMOG00000000927	cnih1
ENSGMOG00000000928	adra2b
ENSGMOG00000000930	rgs7b
ENSGMOG00000000931	gipc3
ENSGMOG00000000932	SLC6A13
ENSGMOG00000000933	cd9b
ENSGMOG00000000935	zgc:163098
ENSGMOG00000000936	cdkn3
ENSGMOG00000000937	necab2
ENSGMOG00000000939	wdtc1
ENSGMOG00000000940	scamp5b
ENSGMOG00000000941	ppp3r1b
ENSGMOG00000000949	slc22a2
ENSGMOG00000000950	si:zfos-943e10.1
ENSGMOG00000000951	sos2
ENSGMOG00000000954	ccdc90b
ENSGMOG00000000956	fhdc3
ENSGMOG00000000957	serpinc1
ENSGMOG00000000959	slc38a8a
ENSGMOG00000000960	rfc1
ENSGMOG00000000961	tmem222a
ENSGMOG00000000965	igf2r
ENSGMOG00000000967	dusp2
ENSGMOG00000000968	CU651662.1
ENSGMOG00000000969	prkcq
ENSGMOG00000000970	glrbb
ENSGMOG00000000971	lim2.2
ENSGMOG00000000974	wdr44
ENSGMOG00000000978	MYORG
ENSGMOG00000000979	mbtps1
ENSGMOG00000000980	faf1
ENSGMOG00000000981	trub2
ENSGMOG00000000983	wdr47b
ENSGMOG00000000984	nr0b2a
ENSGMOG00000000985	nup50
ENSGMOG00000000987	cd276
ENSGMOG00000000988	l2hgdh
ENSGMOG00000000990	osbp
ENSGMOG00000000991	gpatch3
ENSGMOG00000000993	sfmbt2
ENSGMOG00000000994	ubl7b
ENSGMOG00000000996	isl1
ENSGMOG00000000997	dmac2l
ENSGMOG00000000999	zgc:172139
ENSGMOG00000001000	pnpla8
ENSGMOG00000001001	klhl13
ENSGMOG00000001002	rpl9
ENSGMOG00000001004	pskh1
ENSGMOG00000001005	arfip2a
ENSGMOG00000001006	msi1
ENSGMOG00000001008	casp3a
ENSGMOG00000001009	astn1
ENSGMOG00000001010	gpn2
ENSGMOG00000001012	cdkl1
ENSGMOG00000001015	lias
ENSGMOG00000001017	edc4
ENSGMOG00000001020	fbxo7
ENSGMOG00000001021	rhot2
ENSGMOG00000001024	arid1aa
ENSGMOG00000001026	FP102018.1
ENSGMOG00000001027	ube2q1
ENSGMOG00000001028	slc2a11a
ENSGMOG00000001029	tmem110l
ENSGMOG00000001030	camsap2a
ENSGMOG00000001031	ppp1r14c
ENSGMOG00000001032	fbln1
ENSGMOG00000001033	dnm1l
ENSGMOG00000001034	tll1
ENSGMOG00000001035	map4k5
ENSGMOG00000001036	ugdh
ENSGMOG00000001037	dusp19b
ENSGMOG00000001038	hnf1a
ENSGMOG00000001039	ampd2b
ENSGMOG00000001040	IYD
ENSGMOG00000001042	chrnb4
ENSGMOG00000001044	sec63
ENSGMOG00000001048	myo6a
ENSGMOG00000001050	chrna3
ENSGMOG00000001052	itih5
ENSGMOG00000001053	vwa7
ENSGMOG00000001055	cpe
ENSGMOG00000001060	pparab
ENSGMOG00000001061	pds5a
ENSGMOG00000001063	ddx59
ENSGMOG00000001064	atp10d
ENSGMOG00000001065	unc119.1
ENSGMOG00000001067	gnat2
ENSGMOG00000001069	nploc4
ENSGMOG00000001070	si:ch211-288d18.1
ENSGMOG00000001071	lrrc40
ENSGMOG00000001072	msmo1
ENSGMOG00000001073	pop5
ENSGMOG00000001074	dock1
ENSGMOG00000001076	tnnt2c
ENSGMOG00000001077	atl1
ENSGMOG00000001078	slc27a4
ENSGMOG00000001081	rnf10
ENSGMOG00000001082	yars2
ENSGMOG00000001083	si:ch211-132b12.1
ENSGMOG00000001084	kif14
ENSGMOG00000001085	klhl2
ENSGMOG00000001086	strap
ENSGMOG00000001087	ranbp10
ENSGMOG00000001088	cry1a
ENSGMOG00000001091	abtb2a
ENSGMOG00000001093	ugt5b4
ENSGMOG00000001096	rcc2
ENSGMOG00000001097	cdkn1bb
ENSGMOG00000001099	smek1
ENSGMOG00000001100	baz2a
ENSGMOG00000001104	sav1
ENSGMOG00000001105	nptnb
ENSGMOG00000001108	btbd11a
ENSGMOG00000001109	det1
ENSGMOG00000001110	med28
ENSGMOG00000001113	dhdds
ENSGMOG00000001115	gprc5c
ENSGMOG00000001119	ptprt
ENSGMOG00000001120	pgam2
ENSGMOG00000001121	zdhhc14
ENSGMOG00000001122	cntd2
ENSGMOG00000001123	efhd2
ENSGMOG00000001124	syk
ENSGMOG00000001127	lap3
ENSGMOG00000001128	atp2c1
ENSGMOG00000001129	sfi1
ENSGMOG00000001135	icmt
ENSGMOG00000001137	paplnb
ENSGMOG00000001139	slc43a3b
ENSGMOG00000001140	picalma
ENSGMOG00000001142	dazap1
ENSGMOG00000001144	chrm4a
ENSGMOG00000001148	tnni4b.2
ENSGMOG00000001149	rtel1
ENSGMOG00000001150	bdkrb1
ENSGMOG00000001153	akt2
ENSGMOG00000001155	pepd
ENSGMOG00000001156	zgc:172271
ENSGMOG00000001157	hspb15
ENSGMOG00000001158	DRD5
ENSGMOG00000001160	trnau1apb
ENSGMOG00000001161	pigv
ENSGMOG00000001162	clrn2
ENSGMOG00000001163	gamt
ENSGMOG00000001167	rint1
ENSGMOG00000001169	sort1b
ENSGMOG00000001172	zgc:171452
ENSGMOG00000001173	slc4a1b
ENSGMOG00000001175	mad2l2
ENSGMOG00000001177	drc1
ENSGMOG00000001178	tapt1b
ENSGMOG00000001179	zdhhc18a
ENSGMOG00000001181	ccdc83
ENSGMOG00000001182	si:dkey-27j5.5
ENSGMOG00000001183	ndufs7
ENSGMOG00000001184	ptges3b
ENSGMOG00000001186	cndp2
ENSGMOG00000001187	fitm1l
ENSGMOG00000001188	dhx40
ENSGMOG00000001189	sv2bb
ENSGMOG00000001191	parpbp
ENSGMOG00000001194	aldh8a1
ENSGMOG00000001195	naca
ENSGMOG00000001196	lancl2
ENSGMOG00000001197	myo1hb
ENSGMOG00000001198	sirt4
ENSGMOG00000001199	ATXN7L3
ENSGMOG00000001205	phf14
ENSGMOG00000001206	stk38a
ENSGMOG00000001207	cdkal1
ENSGMOG00000001209	prom1b
ENSGMOG00000001211	arid3a
ENSGMOG00000001212	pcdh18b
ENSGMOG00000001213	uqcc2
ENSGMOG00000001218	prim1
ENSGMOG00000001219	nup37
ENSGMOG00000001220	aqp8a.1
ENSGMOG00000001222	pygl
ENSGMOG00000001225	alpi.2
ENSGMOG00000001226	nfyal
ENSGMOG00000001227	soat2
ENSGMOG00000001230	lcmt1
ENSGMOG00000001231	r3hdm4
ENSGMOG00000001233	th2
ENSGMOG00000001234	f2rl1.1
ENSGMOG00000001235	smpd1
ENSGMOG00000001236	slc2a1a
ENSGMOG00000001237	samsn1a
ENSGMOG00000001238	coro1cb
ENSGMOG00000001239	fuom
ENSGMOG00000001242	ABCA7
ENSGMOG00000001244	abcc9
ENSGMOG00000001245	ch25hl3
ENSGMOG00000001246	shcbp1
ENSGMOG00000001247	tpte
ENSGMOG00000001248	crhbp
ENSGMOG00000001249	ahcyl1
ENSGMOG00000001250	alpi.1
ENSGMOG00000001251	rrad
ENSGMOG00000001254	fgfbp2b
ENSGMOG00000001255	sema3gb
ENSGMOG00000001256	mpped1
ENSGMOG00000001257	cdh16
ENSGMOG00000001260	tspo
ENSGMOG00000001261	hspa13
ENSGMOG00000001263	pah
ENSGMOG00000001265	celsr1a
ENSGMOG00000001267	gpx7
ENSGMOG00000001268	slc38a9
ENSGMOG00000001270	RIN2
ENSGMOG00000001275	rnf185
ENSGMOG00000001281	tut4
ENSGMOG00000001283	gdpd5b
ENSGMOG00000001284	anxa5b
ENSGMOG00000001285	copb1
ENSGMOG00000001286	si:ch211-287a12.9
ENSGMOG00000001288	nsmfa
ENSGMOG00000001289	slc6a17
ENSGMOG00000001290	tarbp2
ENSGMOG00000001291	nppc
ENSGMOG00000001292	si:dkey-33c12.4
ENSGMOG00000001293	tmem208
ENSGMOG00000001295	ca7
ENSGMOG00000001299	zgc:136858
ENSGMOG00000001302	slc16a4
ENSGMOG00000001303	uchl1
ENSGMOG00000001304	kcnj8
ENSGMOG00000001305	pcdh15a
ENSGMOG00000001306	tespa1
ENSGMOG00000001307	nae1
ENSGMOG00000001309	serpinh1b
ENSGMOG00000001310	si:ch73-62l21.1
ENSGMOG00000001315	zgc:55888
ENSGMOG00000001316	limch1a
ENSGMOG00000001317	iscub
ENSGMOG00000001319	tub
ENSGMOG00000001320	slc7a6os
ENSGMOG00000001321	gucy2f
ENSGMOG00000001323	trmu
ENSGMOG00000001325	rhpn1
ENSGMOG00000001328	map2k5
ENSGMOG00000001329	cnot4b
ENSGMOG00000001333	lrp1bb
ENSGMOG00000001336	dync1li2
ENSGMOG00000001338	si:ch73-263o4.4
ENSGMOG00000001339	slc7a6
ENSGMOG00000001340	recql4
ENSGMOG00000001341	ncl
ENSGMOG00000001343	si:zfos-128g4.2
ENSGMOG00000001344	ZNF335
ENSGMOG00000001345	mafaa
ENSGMOG00000001353	lmo1
ENSGMOG00000001354	pex11g
ENSGMOG00000001356	cyldl
ENSGMOG00000001357	ess2
ENSGMOG00000001358	cmtm3
ENSGMOG00000001359	pthlhb
ENSGMOG00000001363	tmem178
ENSGMOG00000001364	stk33
ENSGMOG00000001365	TMEM19
ENSGMOG00000001366	lrrc29
ENSGMOG00000001368	armh1
ENSGMOG00000001371	galns
ENSGMOG00000001372	flot2b
ENSGMOG00000001376	ak7a
ENSGMOG00000001377	dgcr2
ENSGMOG00000001378	tmem192
ENSGMOG00000001379	slc22a13b
ENSGMOG00000001380	coch
ENSGMOG00000001381	bbs2
ENSGMOG00000001382	armc9
ENSGMOG00000001388	tprkb
ENSGMOG00000001392	ldhbb
ENSGMOG00000001399	vps53
ENSGMOG00000001400	mmp9
ENSGMOG00000001401	iffo2b
ENSGMOG00000001403	prkab1a
ENSGMOG00000001406	trappc2l
ENSGMOG00000001407	MYG1
ENSGMOG00000001409	tma16
ENSGMOG00000001412	car15
ENSGMOG00000001414	golt1bb
ENSGMOG00000001416	hdac3
ENSGMOG00000001422	mrto4
ENSGMOG00000001424	panx3
ENSGMOG00000001426	rxfp3.3a3
ENSGMOG00000001429	slc35b4
ENSGMOG00000001430	polr2h
ENSGMOG00000001433	map4k4
ENSGMOG00000001434	ufl1
ENSGMOG00000001437	pknox2
ENSGMOG00000001438	CABZ01045212.1
ENSGMOG00000001439	rflnb
ENSGMOG00000001441	akr7a3
ENSGMOG00000001442	fbxw7
ENSGMOG00000001443	scg5
ENSGMOG00000001444	nelfcd
ENSGMOG00000001446	otofa
ENSGMOG00000001447	hdac11
ENSGMOG00000001448	pno1
ENSGMOG00000001449	tnnc1b
ENSGMOG00000001450	nup98
ENSGMOG00000001452	dus4l
ENSGMOG00000001455	megf6b
ENSGMOG00000001457	uacab
ENSGMOG00000001460	lmf1
ENSGMOG00000001461	rev3l
ENSGMOG00000001463	dclk1b
ENSGMOG00000001464	CABZ01032476.1
ENSGMOG00000001466	cyth1a
ENSGMOG00000001468	robo4
ENSGMOG00000001469	camk4
ENSGMOG00000001472	phactr2
ENSGMOG00000001473	mylipa
ENSGMOG00000001474	ephb3a
ENSGMOG00000001476	kdm5ba
ENSGMOG00000001479	cyp17a2
ENSGMOG00000001480	nsmfb
ENSGMOG00000001484	cbfa2t3
ENSGMOG00000001487	dennd2b
ENSGMOG00000001489	spartb
ENSGMOG00000001490	cul4b
ENSGMOG00000001491	myo1b
ENSGMOG00000001493	tle3a
ENSGMOG00000001494	slc35e1
ENSGMOG00000001495	mfsd4b
ENSGMOG00000001496	cox19
ENSGMOG00000001497	sae1
ENSGMOG00000001504	kcnab2a
ENSGMOG00000001506	adcy3b
ENSGMOG00000001507	timp2a
ENSGMOG00000001508	ACSF3
ENSGMOG00000001510	atxn7l3
ENSGMOG00000001513	stxbp6l
ENSGMOG00000001515	fndc1
ENSGMOG00000001518	robo3
ENSGMOG00000001519	ghrhra
ENSGMOG00000001521	sfxn2
ENSGMOG00000001523	lamp2
ENSGMOG00000001524	adipor1a
ENSGMOG00000001525	postnb
ENSGMOG00000001526	psat1
ENSGMOG00000001527	NCKAP1L
ENSGMOG00000001528	cyp27c1
ENSGMOG00000001531	ubtf
ENSGMOG00000001534	cdh15
ENSGMOG00000001535	park7
ENSGMOG00000001536	adcyap1r1a
ENSGMOG00000001537	chd1
ENSGMOG00000001538	c1galt1a
ENSGMOG00000001540	srfa
ENSGMOG00000001542	atp1b4
ENSGMOG00000001544	arl3a
ENSGMOG00000001545	tmem9b
ENSGMOG00000001546	wdr26a
ENSGMOG00000001549	pax7b
ENSGMOG00000001550	scube2
ENSGMOG00000001551	trpc4b
ENSGMOG00000001553	trim8b
ENSGMOG00000001554	tmem255a
ENSGMOG00000001555	rabggtb
ENSGMOG00000001557	shrprbck1r
ENSGMOG00000001558	mrps16
ENSGMOG00000001560	eif4a3
ENSGMOG00000001561	myl10
ENSGMOG00000001565	spg7
ENSGMOG00000001567	slc4a1a
ENSGMOG00000001572	best4
ENSGMOG00000001575	gatb
ENSGMOG00000001576	frem2b
ENSGMOG00000001577	nudt12
ENSGMOG00000001579	cdk2
ENSGMOG00000001580	sorcs2
ENSGMOG00000001583	st6galnac1.1
ENSGMOG00000001585	myot
ENSGMOG00000001591	C9H2orf76
ENSGMOG00000001592	nkap
ENSGMOG00000001596	sinhcafl
ENSGMOG00000001598	pmela
ENSGMOG00000001599	srsf2a
ENSGMOG00000001600	si:zfos-2326c3.2
ENSGMOG00000001601	CABZ01063543.1
ENSGMOG00000001602	sod2
ENSGMOG00000001603	igfbp2a
ENSGMOG00000001604	RNF157
ENSGMOG00000001605	foxk2
ENSGMOG00000001606	ctps1a
ENSGMOG00000001607	dennd5a
ENSGMOG00000001610	ankrd55
ENSGMOG00000001611	htra1b
ENSGMOG00000001613	wtap
ENSGMOG00000001615	CABZ01072242.1
ENSGMOG00000001617	KCNT1
ENSGMOG00000001619	si:ch73-21k16.1
ENSGMOG00000001621	upf3b
ENSGMOG00000001629	vps45
ENSGMOG00000001630	acat2
ENSGMOG00000001631	trim3a
ENSGMOG00000001632	prph
ENSGMOG00000001635	rsph3
ENSGMOG00000001636	rpl39
ENSGMOG00000001637	vav2
ENSGMOG00000001641	sctr
ENSGMOG00000001642	CABZ01073795.1
ENSGMOG00000001645	GNPAT
ENSGMOG00000001647	tcp1
ENSGMOG00000001648	ezrb
ENSGMOG00000001652	zgc:153659
ENSGMOG00000001654	pex10
ENSGMOG00000001656	fhdc4
ENSGMOG00000001659	thsd1
ENSGMOG00000001660	arfgef3
ENSGMOG00000001661	tmem41b
ENSGMOG00000001662	si:dkey-42i9.6
ENSGMOG00000001663	si:ch73-29c22.1
ENSGMOG00000001664	esyt2b
ENSGMOG00000001665	cdca8
ENSGMOG00000001666	tmem121b
ENSGMOG00000001667	thbs4b
ENSGMOG00000001671	sept6
ENSGMOG00000001672	trpv4
ENSGMOG00000001673	mthfr
ENSGMOG00000001674	parp4
ENSGMOG00000001677	slc7a11
ENSGMOG00000001681	ipo7
ENSGMOG00000001685	mkrn1
ENSGMOG00000001686	supt7l
ENSGMOG00000001687	clcn6
ENSGMOG00000001694	CABZ01089777.1
ENSGMOG00000001695	wdr43
ENSGMOG00000001696	ech1
ENSGMOG00000001697	slkb
ENSGMOG00000001698	enpp1
ENSGMOG00000001702	ube2a
ENSGMOG00000001706	snw1
ENSGMOG00000001707	rps3a
ENSGMOG00000001709	klhdc8a
ENSGMOG00000001712	b4galnt2.2
ENSGMOG00000001713	elf1
ENSGMOG00000001715	lrba
ENSGMOG00000001716	vps36
ENSGMOG00000001721	bdh1
ENSGMOG00000001723	KCNH2
ENSGMOG00000001724	slc22a13a
ENSGMOG00000001725	tmem254
ENSGMOG00000001726	b4galnt2.2
ENSGMOG00000001727	sptlc2b
ENSGMOG00000001731	tnmd
ENSGMOG00000001732	kcnk9
ENSGMOG00000001733	gyg1b
ENSGMOG00000001735	unc13ba
ENSGMOG00000001737	spdya
ENSGMOG00000001738	slc35f6
ENSGMOG00000001739	stn1
ENSGMOG00000001741	acaca
ENSGMOG00000001743	eif4e2rs1
ENSGMOG00000001744	proser1
ENSGMOG00000001745	gnl3
ENSGMOG00000001747	nlk1
ENSGMOG00000001748	ppip5k2
ENSGMOG00000001750	ism2b
ENSGMOG00000001752	cpb1
ENSGMOG00000001755	hnrnpub
ENSGMOG00000001756	srgap1b
ENSGMOG00000001757	fen1
ENSGMOG00000001758	apoa1a
ENSGMOG00000001759	slc26a1
ENSGMOG00000001760	slc46a3
ENSGMOG00000001761	maza
ENSGMOG00000001763	cyb561a3a
ENSGMOG00000001765	slc39a6
ENSGMOG00000001766	snx4
ENSGMOG00000001770	pwwp2b
ENSGMOG00000001771	tm9sf1
ENSGMOG00000001773	nppal
ENSGMOG00000001775	tppp
ENSGMOG00000001776	map3k7
ENSGMOG00000001779	CABZ01102039.1
ENSGMOG00000001781	cdipt
ENSGMOG00000001782	taf1a
ENSGMOG00000001783	glt8d1
ENSGMOG00000001784	mtus2a
ENSGMOG00000001788	zic1
ENSGMOG00000001789	paqr3b
ENSGMOG00000001791	zgc:101858
ENSGMOG00000001794	pih1d1
ENSGMOG00000001796	rps16
ENSGMOG00000001801	ipo4
ENSGMOG00000001802	tesk2
ENSGMOG00000001805	dnm1l
ENSGMOG00000001806	cacna1fb
ENSGMOG00000001807	ppcs
ENSGMOG00000001808	bin1a
ENSGMOG00000001809	nek4
ENSGMOG00000001811	adrb2a
ENSGMOG00000001812	CABZ01102038.1
ENSGMOG00000001814	ppil3
ENSGMOG00000001817	si:ch73-206p6.1
ENSGMOG00000001818	ppp1r12a
ENSGMOG00000001820	sh3tc2
ENSGMOG00000001821	slc7a1a
ENSGMOG00000001822	klhdc4
ENSGMOG00000001823	polr2d
ENSGMOG00000001824	utp3
ENSGMOG00000001825	ap2s1
ENSGMOG00000001826	ccdc135
ENSGMOG00000001827	lrrc8ab
ENSGMOG00000001828	nox5
ENSGMOG00000001829	cog3
ENSGMOG00000001832	scarb2a
ENSGMOG00000001834	rab4b
ENSGMOG00000001835	gabra3
ENSGMOG00000001836	si:ch211-207k7.4
ENSGMOG00000001837	gins4
ENSGMOG00000001838	urb1
ENSGMOG00000001839	dhx57
ENSGMOG00000001840	taar10
ENSGMOG00000001846	swap70b
ENSGMOG00000001847	si:ch211-196f5.2
ENSGMOG00000001851	kctd7
ENSGMOG00000001852	ablim3
ENSGMOG00000001854	sbf2
ENSGMOG00000001855	cnmd
ENSGMOG00000001856	rec8b
ENSGMOG00000001858	si:ch73-92i20.1
ENSGMOG00000001859	adgrb1a
ENSGMOG00000001860	dclk2a
ENSGMOG00000001863	tmbim4
ENSGMOG00000001864	EMP3
ENSGMOG00000001867	PCDH8
ENSGMOG00000001868	canx
ENSGMOG00000001870	rpl35a
ENSGMOG00000001871	desma
ENSGMOG00000001872	wee1
ENSGMOG00000001873	sh3bp4
ENSGMOG00000001874	rnpepl1
ENSGMOG00000001875	b2ml
ENSGMOG00000001879	unc5da
ENSGMOG00000001880	pdcd6
ENSGMOG00000001881	ugt1b5
ENSGMOG00000001883	cntnap5a
ENSGMOG00000001888	znf143b
ENSGMOG00000001890	afap1l1a
ENSGMOG00000001891	trpv1
ENSGMOG00000001892	znf362a
ENSGMOG00000001896	rabgef1
ENSGMOG00000001897	nr3c2
ENSGMOG00000001899	ENSDARG00000104659
ENSGMOG00000001900	strip2
ENSGMOG00000001901	slitrk5b
ENSGMOG00000001902	trim62.1
ENSGMOG00000001903	hdr
ENSGMOG00000001905	TMEM151A
ENSGMOG00000001907	slc25a3a
ENSGMOG00000001909	pycr1b
ENSGMOG00000001911	arhgap10
ENSGMOG00000001912	LRFN2
ENSGMOG00000001913	miip
ENSGMOG00000001914	slc25a47b
ENSGMOG00000001916	large1
ENSGMOG00000001917	prkcz
ENSGMOG00000001918	dcc
ENSGMOG00000001919	lsm14ab
ENSGMOG00000001920	fbxo8
ENSGMOG00000001921	si:ch211-256e16.11
ENSGMOG00000001922	gabrp
ENSGMOG00000001923	scn1lab
ENSGMOG00000001924	plekhg2
ENSGMOG00000001925	slc4a1ap
ENSGMOG00000001927	ltc4s
ENSGMOG00000001928	timeless
ENSGMOG00000001929	dusp6
ENSGMOG00000001932	cep44
ENSGMOG00000001934	polr3h
ENSGMOG00000001936	si:dkey-106n21.1
ENSGMOG00000001937	hpgd
ENSGMOG00000001938	slc6a6b
ENSGMOG00000001939	eif2a
ENSGMOG00000001940	ampd3a
ENSGMOG00000001941	mmel1
ENSGMOG00000001946	aco2
ENSGMOG00000001947	wnt8a
ENSGMOG00000001950	sdf2l1
ENSGMOG00000001953	rrp1
ENSGMOG00000001955	prdm4
ENSGMOG00000001956	wnt8a
ENSGMOG00000001957	prmt9
ENSGMOG00000001961	tsen34
ENSGMOG00000001962	sp3a
ENSGMOG00000001966	lyve1a
ENSGMOG00000001967	xirp2a
ENSGMOG00000001968	tnfrsf11b
ENSGMOG00000001969	zc3h7ba
ENSGMOG00000001971	osbpl7
ENSGMOG00000001972	hnf4g
ENSGMOG00000001973	si:dkey-16j16.4
ENSGMOG00000001974	prxl2b
ENSGMOG00000001975	CABZ01078606.1
ENSGMOG00000001976	cdca7a
ENSGMOG00000001977	tmsb2
ENSGMOG00000001980	slc8a2b
ENSGMOG00000001981	morc3a
ENSGMOG00000001983	ntrk3b
ENSGMOG00000001984	ppm1ba
ENSGMOG00000001985	slc45a1
ENSGMOG00000001987	pign
ENSGMOG00000001989	tmem184c
ENSGMOG00000001992	tlcd2
ENSGMOG00000001993	mmp19
ENSGMOG00000001994	ndufaf4
ENSGMOG00000001995	mrvi1
ENSGMOG00000001996	babam2
ENSGMOG00000001998	slc25a14
ENSGMOG00000001999	slc3a1
ENSGMOG00000002000	samhd1
ENSGMOG00000002001	aifm4
ENSGMOG00000002004	srsf7a
ENSGMOG00000002006	gpc6a
ENSGMOG00000002010	ednrab
ENSGMOG00000002016	cldn10l2
ENSGMOG00000002018	mcrs1
ENSGMOG00000002019	CABZ01079748.1
ENSGMOG00000002020	rangap1a
ENSGMOG00000002021	hnrnpl2
ENSGMOG00000002024	prepl
ENSGMOG00000002027	ccdc114
ENSGMOG00000002028	prpf8
ENSGMOG00000002029	grik1b
ENSGMOG00000002030	cldn10a
ENSGMOG00000002031	eif5b
ENSGMOG00000002036	OTUD7A
ENSGMOG00000002037	relch
ENSGMOG00000002039	metap2b
ENSGMOG00000002041	ctr9
ENSGMOG00000002042	dnajc3a
ENSGMOG00000002043	actr3
ENSGMOG00000002044	cyp27b1
ENSGMOG00000002045	smarce1
ENSGMOG00000002046	rbx1
ENSGMOG00000002047	dchs1b
ENSGMOG00000002048	hsd17b12b
ENSGMOG00000002049	vezt
ENSGMOG00000002050	st13
ENSGMOG00000002052	tas1r3
ENSGMOG00000002054	pard6gb
ENSGMOG00000002057	acss2
ENSGMOG00000002058	si:dkey-283b1.7
ENSGMOG00000002060	slc22a13a
ENSGMOG00000002063	dlc1
ENSGMOG00000002065	ppp1r9ala
ENSGMOG00000002066	mettl1
ENSGMOG00000002067	bloc1s4
ENSGMOG00000002068	xpnpep3
ENSGMOG00000002071	oxsr1a
ENSGMOG00000002073	uggt2
ENSGMOG00000002075	neu4
ENSGMOG00000002079	cdk4
ENSGMOG00000002080	usp16
ENSGMOG00000002081	srprb
ENSGMOG00000002082	eif4g2a
ENSGMOG00000002085	fgd6
ENSGMOG00000002088	ep300b
ENSGMOG00000002089	csnk1e
ENSGMOG00000002091	zgc:173742
ENSGMOG00000002093	rpl23
ENSGMOG00000002095	si:ch211-186j3.6
ENSGMOG00000002096	rilp
ENSGMOG00000002097	gpaa1
ENSGMOG00000002098	cx52.7
ENSGMOG00000002100	plcd1b
ENSGMOG00000002101	lonrf1l
ENSGMOG00000002102	aldh1l2
ENSGMOG00000002103	pdk1
ENSGMOG00000002104	cntnap3
ENSGMOG00000002106	ankrd6b
ENSGMOG00000002108	thraa
ENSGMOG00000002109	cpdp
ENSGMOG00000002111	galnt18b
ENSGMOG00000002112	trim55b
ENSGMOG00000002113	exosc4
ENSGMOG00000002115	bco1l
ENSGMOG00000002116	rrm2b
ENSGMOG00000002117	SLC66A2
ENSGMOG00000002118	CABZ01075572.1
ENSGMOG00000002123	sms
ENSGMOG00000002124	sult1st4
ENSGMOG00000002125	prkacbb
ENSGMOG00000002127	ENSDARG00000042213
ENSGMOG00000002129	pip4k2cb
ENSGMOG00000002133	soul3
ENSGMOG00000002136	slc26a6
ENSGMOG00000002139	tmem205
ENSGMOG00000002140	tars3
ENSGMOG00000002143	btbd10b
ENSGMOG00000002144	sagb
ENSGMOG00000002145	si:dkey-259j3.5
ENSGMOG00000002147	dusp3a
ENSGMOG00000002150	hs6st3b
ENSGMOG00000002152	acsl1b
ENSGMOG00000002153	hhatla
ENSGMOG00000002155	cadm2b
ENSGMOG00000002157	map4k3b
ENSGMOG00000002163	si:dkey-46g23.5
ENSGMOG00000002164	itga6a
ENSGMOG00000002166	khsrp
ENSGMOG00000002168	vtna
ENSGMOG00000002171	myh7l
ENSGMOG00000002172	fam107b
ENSGMOG00000002174	si:dkey-23o4.6
ENSGMOG00000002175	si:dkey-246g23.2
ENSGMOG00000002181	ulk3
ENSGMOG00000002183	angptl5
ENSGMOG00000002186	rpl30
ENSGMOG00000002187	gbe1b
ENSGMOG00000002188	tmem234
ENSGMOG00000002189	scpep1
ENSGMOG00000002191	pappaa
ENSGMOG00000002192	st3gal5
ENSGMOG00000002193	scara5
ENSGMOG00000002197	sarm1
ENSGMOG00000002199	rcan3
ENSGMOG00000002200	si:ch1073-390k14.1
ENSGMOG00000002202	tspan4b
ENSGMOG00000002203	trpc6a
ENSGMOG00000002208	top3a
ENSGMOG00000002209	vipr1a
ENSGMOG00000002210	stk3
ENSGMOG00000002212	nipal3
ENSGMOG00000002213	engase
ENSGMOG00000002215	slc44a2
ENSGMOG00000002217	tead1b
ENSGMOG00000002219	pbk
ENSGMOG00000002221	CU459056.1
ENSGMOG00000002225	b2ml
ENSGMOG00000002226	nmur3
ENSGMOG00000002227	cmip
ENSGMOG00000002229	slc46a1
ENSGMOG00000002230	polr1a
ENSGMOG00000002232	ahsg2
ENSGMOG00000002234	esco2
ENSGMOG00000002239	itpr1b
ENSGMOG00000002240	zdhhc20a
ENSGMOG00000002241	calcr
ENSGMOG00000002242	nup58
ENSGMOG00000002243	si:dkey-220k22.1
ENSGMOG00000002244	SLC7A1
ENSGMOG00000002245	spag1a
ENSGMOG00000002249	nomo
ENSGMOG00000002250	dlx1a
ENSGMOG00000002253	tspan35
ENSGMOG00000002254	mical2a
ENSGMOG00000002256	grhl3
ENSGMOG00000002257	arhgap42a
ENSGMOG00000002258	myh7
ENSGMOG00000002261	pcyt1bb
ENSGMOG00000002262	hat1
ENSGMOG00000002269	ENSDARG00000074984
ENSGMOG00000002270	ccdc25
ENSGMOG00000002271	calua
ENSGMOG00000002273	mri1
ENSGMOG00000002274	smcr8a
ENSGMOG00000002276	lipia
ENSGMOG00000002278	itfg2
ENSGMOG00000002279	si:ch211-208k15.1
ENSGMOG00000002280	GAN
ENSGMOG00000002281	hsf2bp
ENSGMOG00000002283	cnksr1
ENSGMOG00000002285	galm
ENSGMOG00000002287	rpe65a
ENSGMOG00000002288	slc40a1
ENSGMOG00000002289	ptpn2b
ENSGMOG00000002290	bud31
ENSGMOG00000002292	mtmr6
ENSGMOG00000002295	gins1
ENSGMOG00000002297	si:ch211-114c12.2
ENSGMOG00000002299	snrnp35
ENSGMOG00000002300	kbtbd8
ENSGMOG00000002303	si:dkey-266m15.6
ENSGMOG00000002305	foxo1a
ENSGMOG00000002312	mpp4l
ENSGMOG00000002313	dkk3a
ENSGMOG00000002323	psmg2
ENSGMOG00000002324	ptcd3
ENSGMOG00000002325	cacna1ea
ENSGMOG00000002326	usp47
ENSGMOG00000002328	trappc10
ENSGMOG00000002334	zbtb38
ENSGMOG00000002337	zgc:91860
ENSGMOG00000002339	soga3b
ENSGMOG00000002340	suclg2
ENSGMOG00000002341	HECTD4
ENSGMOG00000002342	zgc:136439
ENSGMOG00000002344	zbtb41
ENSGMOG00000002345	cog6
ENSGMOG00000002346	entpd6
ENSGMOG00000002347	si:ch211-154e10.1
ENSGMOG00000002348	crybb1l3
ENSGMOG00000002350	rps6ka1
ENSGMOG00000002351	limch1a
ENSGMOG00000002357	sympk
ENSGMOG00000002358	dcaf17
ENSGMOG00000002359	cdh13
ENSGMOG00000002364	cryba1a
ENSGMOG00000002365	tmc5
ENSGMOG00000002367	tpmt.2
ENSGMOG00000002368	grhl2b
ENSGMOG00000002370	FOXK2
ENSGMOG00000002371	stk10
ENSGMOG00000002372	nectin1a
ENSGMOG00000002373	elovl4a
ENSGMOG00000002374	mettl8
ENSGMOG00000002376	pip4p1b
ENSGMOG00000002377	pls3
ENSGMOG00000002378	pdha1a
ENSGMOG00000002379	cnga4
ENSGMOG00000002380	wdr27
ENSGMOG00000002381	tmem115
ENSGMOG00000002382	cpda
ENSGMOG00000002384	has2
ENSGMOG00000002385	chek1
ENSGMOG00000002386	acadm
ENSGMOG00000002387	pfdn1
ENSGMOG00000002390	ENSDARG00000115101
ENSGMOG00000002394	prdx4
ENSGMOG00000002396	oatx
ENSGMOG00000002398	zc3h15
ENSGMOG00000002399	fam160a2
ENSGMOG00000002402	nav3
ENSGMOG00000002403	slc12a7a
ENSGMOG00000002405	rad1
ENSGMOG00000002406	CLEC3A
ENSGMOG00000002408	sema3h
ENSGMOG00000002409	rcbtb2
ENSGMOG00000002410	fancl
ENSGMOG00000002413	rabepk
ENSGMOG00000002414	sec23b
ENSGMOG00000002415	nxnl1
ENSGMOG00000002416	arl8bb
ENSGMOG00000002417	bfb
ENSGMOG00000002420	sema6ba
ENSGMOG00000002421	vat1l
ENSGMOG00000002422	cnga2a
ENSGMOG00000002423	klhl14
ENSGMOG00000002425	bxdc2
ENSGMOG00000002426	usp46
ENSGMOG00000002427	rbm45
ENSGMOG00000002428	rasgef1bb
ENSGMOG00000002430	sema3fb
ENSGMOG00000002432	wdr27
ENSGMOG00000002433	zgc:153704
ENSGMOG00000002434	gfra4b
ENSGMOG00000002435	fndc3a
ENSGMOG00000002436	vrk2
ENSGMOG00000002437	hspa5
ENSGMOG00000002440	bmpr1aa
ENSGMOG00000002443	bola3
ENSGMOG00000002444	abcf3
ENSGMOG00000002447	BRSK2
ENSGMOG00000002448	pabpc1a
ENSGMOG00000002452	zdhhc23a
ENSGMOG00000002453	gosr1
ENSGMOG00000002455	dtna
ENSGMOG00000002456	pkd1l2b
ENSGMOG00000002457	dnaja2b
ENSGMOG00000002459	phlda1
ENSGMOG00000002461	rpp25a
ENSGMOG00000002462	tmem259
ENSGMOG00000002463	layna
ENSGMOG00000002464	gad1a
ENSGMOG00000002465	golga2
ENSGMOG00000002466	slc5a7a
ENSGMOG00000002468	mhc1uma
ENSGMOG00000002469	nap1l1
ENSGMOG00000002470	aprt
ENSGMOG00000002471	prelid3a
ENSGMOG00000002472	ankrd50l
ENSGMOG00000002473	id3
ENSGMOG00000002474	eml2
ENSGMOG00000002475	map3k8
ENSGMOG00000002476	col11a2
ENSGMOG00000002478	CU459012.1
ENSGMOG00000002479	camkvb
ENSGMOG00000002480	trarg1a
ENSGMOG00000002482	ppp6r2b
ENSGMOG00000002483	atp6v1aa
ENSGMOG00000002487	sez6a
ENSGMOG00000002488	dbx1a
ENSGMOG00000002489	spcs2
ENSGMOG00000002490	med16
ENSGMOG00000002491	alg9
ENSGMOG00000002494	aipl1
ENSGMOG00000002497	sp5a
ENSGMOG00000002498	mtpap
ENSGMOG00000002499	lrch3
ENSGMOG00000002500	epha6
ENSGMOG00000002501	dhx32a
ENSGMOG00000002503	mapre2
ENSGMOG00000002505	nptx2a
ENSGMOG00000002506	slc16a10
ENSGMOG00000002508	wasf3a
ENSGMOG00000002509	chmp4c
ENSGMOG00000002511	tmem237b
ENSGMOG00000002512	asb13a.1
ENSGMOG00000002517	fbxo32
ENSGMOG00000002518	pde3a
ENSGMOG00000002519	sf3b4
ENSGMOG00000002521	rpf2
ENSGMOG00000002523	chchd2
ENSGMOG00000002525	dnm1a
ENSGMOG00000002527	miox
ENSGMOG00000002529	zfand1
ENSGMOG00000002530	gdi2
ENSGMOG00000002531	gria4b
ENSGMOG00000002533	bcl10
ENSGMOG00000002534	gpc4
ENSGMOG00000002535	guca1d
ENSGMOG00000002536	vps33a
ENSGMOG00000002537	areg
ENSGMOG00000002538	mast1b
ENSGMOG00000002539	adam12
ENSGMOG00000002540	nedd4a
ENSGMOG00000002541	amd1
ENSGMOG00000002546	MAF1
ENSGMOG00000002550	htatip2
ENSGMOG00000002551	ankrd16
ENSGMOG00000002553	lmf2a
ENSGMOG00000002555	arid3b
ENSGMOG00000002559	slco1c1
ENSGMOG00000002561	lrp8
ENSGMOG00000002562	prcp
ENSGMOG00000002564	gucy2c
ENSGMOG00000002570	prmt3
ENSGMOG00000002571	glt8d2
ENSGMOG00000002575	bicdl2
ENSGMOG00000002576	traip
ENSGMOG00000002577	ntn1b
ENSGMOG00000002578	ubr3
ENSGMOG00000002583	tgfbr2a
ENSGMOG00000002584	klhl8
ENSGMOG00000002585	cebpd
ENSGMOG00000002586	trpc1
ENSGMOG00000002588	hsp90b1
ENSGMOG00000002589	ctss1
ENSGMOG00000002592	hao2
ENSGMOG00000002593	tenm4
ENSGMOG00000002594	znf341
ENSGMOG00000002595	dnajc27
ENSGMOG00000002596	junbb
ENSGMOG00000002597	c2cd5
ENSGMOG00000002599	tmpoa
ENSGMOG00000002601	mtg2
ENSGMOG00000002603	mcm4
ENSGMOG00000002607	grm6b
ENSGMOG00000002610	afdna
ENSGMOG00000002611	prtga
ENSGMOG00000002613	pcolce2b
ENSGMOG00000002615	coa8
ENSGMOG00000002616	brd2a
ENSGMOG00000002617	GUCY1A2
ENSGMOG00000002622	cdh26.2
ENSGMOG00000002624	gpx8
ENSGMOG00000002626	slc6a5
ENSGMOG00000002627	si:dkey-17e16.9
ENSGMOG00000002628	kif13ba
ENSGMOG00000002629	itchb
ENSGMOG00000002631	bambib
ENSGMOG00000002633	kars1
ENSGMOG00000002634	eomesa
ENSGMOG00000002635	scn8aa
ENSGMOG00000002636	comta
ENSGMOG00000002637	ulk2
ENSGMOG00000002638	slitrk6
ENSGMOG00000002639	lingo4a
ENSGMOG00000002641	u2surp
ENSGMOG00000002642	slc22a16
ENSGMOG00000002643	mettl5
ENSGMOG00000002644	waca
ENSGMOG00000002645	vps72a
ENSGMOG00000002646	sdad1
ENSGMOG00000002648	p3h1
ENSGMOG00000002649	smarca4a
ENSGMOG00000002651	cwf19l2
ENSGMOG00000002652	rac1a
ENSGMOG00000002654	b4galt4
ENSGMOG00000002655	ube2v2
ENSGMOG00000002657	slitrk5a
ENSGMOG00000002660	klhl38b
ENSGMOG00000002661	cdh26.1
ENSGMOG00000002664	ssb
ENSGMOG00000002665	syngap1a
ENSGMOG00000002666	b4galnt3b
ENSGMOG00000002667	dapp1
ENSGMOG00000002668	gcshb
ENSGMOG00000002670	crym
ENSGMOG00000002672	casr
ENSGMOG00000002673	usta
ENSGMOG00000002675	nfkb2
ENSGMOG00000002676	mpp7a
ENSGMOG00000002677	nars2
ENSGMOG00000002678	g6pca.2
ENSGMOG00000002680	sntg1
ENSGMOG00000002682	zgc:123321
ENSGMOG00000002684	zgc:175280
ENSGMOG00000002685	snu13a
ENSGMOG00000002688	si:ch211-173n18.3
ENSGMOG00000002689	npm1b
ENSGMOG00000002690	psme3
ENSGMOG00000002692	zranb3
ENSGMOG00000002693	sash1a
ENSGMOG00000002694	sdsl
ENSGMOG00000002695	ptpn13
ENSGMOG00000002696	pex5lb
ENSGMOG00000002698	uqcrc2b
ENSGMOG00000002700	tmem97
ENSGMOG00000002701	prdm12b
ENSGMOG00000002703	C7H16orf87
ENSGMOG00000002704	pigb
ENSGMOG00000002707	atf1
ENSGMOG00000002708	si:ch73-380n15.2
ENSGMOG00000002709	gab2
ENSGMOG00000002710	armc4
ENSGMOG00000002713	usp32
ENSGMOG00000002715	edc3
ENSGMOG00000002718	nbr1a
ENSGMOG00000002719	phgdh
ENSGMOG00000002720	alkbh8
ENSGMOG00000002723	tlx2
ENSGMOG00000002724	kif20a
ENSGMOG00000002725	fkbp4
ENSGMOG00000002726	dip2bb
ENSGMOG00000002727	dlat
ENSGMOG00000002728	csk
ENSGMOG00000002731	panx1a
ENSGMOG00000002734	cxxc1b
ENSGMOG00000002735	ldlra
ENSGMOG00000002736	rab27a
ENSGMOG00000002737	irf10
ENSGMOG00000002738	tmem235b
ENSGMOG00000002740	angpt1
ENSGMOG00000002745	prph2b
ENSGMOG00000002748	ddx11
ENSGMOG00000002749	MFN1
ENSGMOG00000002750	birc5a
ENSGMOG00000002751	ccdc173
ENSGMOG00000002752	rpl13
ENSGMOG00000002754	pkdcca
ENSGMOG00000002755	adal
ENSGMOG00000002756	adgrb1b
ENSGMOG00000002758	timm50
ENSGMOG00000002759	susd1
ENSGMOG00000002760	clns1a
ENSGMOG00000002761	bmp7b
ENSGMOG00000002765	ppig
ENSGMOG00000002766	cpne7
ENSGMOG00000002769	kri1
ENSGMOG00000002770	pde5ab
ENSGMOG00000002771	ippk
ENSGMOG00000002773	mkxa
ENSGMOG00000002776	cds2
ENSGMOG00000002777	cdc23
ENSGMOG00000002779	FO904989.1
ENSGMOG00000002781	CABZ01086812.1
ENSGMOG00000002782	spo11
ENSGMOG00000002783	nat10
ENSGMOG00000002784	slco2b1
ENSGMOG00000002785	zgc:112294
ENSGMOG00000002786	csmd3a
ENSGMOG00000002787	LRATD2
ENSGMOG00000002788	appbp2
ENSGMOG00000002789	prdm10
ENSGMOG00000002791	itgb5
ENSGMOG00000002792	rab18a
ENSGMOG00000002793	fscn2b
ENSGMOG00000002801	wash1
ENSGMOG00000002802	lyrm1
ENSGMOG00000002804	washc5
ENSGMOG00000002809	itgb1a
ENSGMOG00000002812	rab11fip3
ENSGMOG00000002815	pnpla7b
ENSGMOG00000002816	brip1
ENSGMOG00000002820	mbnl3
ENSGMOG00000002821	adad1
ENSGMOG00000002822	hnrnpr
ENSGMOG00000002823	kat2b
ENSGMOG00000002825	iqsec3b
ENSGMOG00000002826	yap1
ENSGMOG00000002827	p2rx4b
ENSGMOG00000002829	zgc:110425
ENSGMOG00000002830	spc24
ENSGMOG00000002833	mapk10
ENSGMOG00000002834	ecm2
ENSGMOG00000002835	si:dkey-161j23.6
ENSGMOG00000002838	rap2ab
ENSGMOG00000002839	serpinf1
ENSGMOG00000002840	dhx38
ENSGMOG00000002841	decr2
ENSGMOG00000002843	cax1
ENSGMOG00000002845	tcp11l2
ENSGMOG00000002848	zgc:92907
ENSGMOG00000002850	fastkd1
ENSGMOG00000002853	caprin1b
ENSGMOG00000002855	dnajc8
ENSGMOG00000002856	slc13a5a
ENSGMOG00000002857	tnnc1a
ENSGMOG00000002858	si:zfos-80g12.1
ENSGMOG00000002861	cftr
ENSGMOG00000002862	dgkg
ENSGMOG00000002863	trpc6b
ENSGMOG00000002864	gucd1
ENSGMOG00000002866	rb1cc1
ENSGMOG00000002867	tbx4
ENSGMOG00000002868	rab5aa
ENSGMOG00000002869	CCDC39
ENSGMOG00000002870	pnp5a
ENSGMOG00000002872	nudt21
ENSGMOG00000002873	slc6a1a
ENSGMOG00000002874	zgc:194209
ENSGMOG00000002875	aspn
ENSGMOG00000002876	actr3b
ENSGMOG00000002878	upb1
ENSGMOG00000002879	clk2a
ENSGMOG00000002883	otud6b
ENSGMOG00000002884	trim8b
ENSGMOG00000002886	pgr
ENSGMOG00000002887	FP102052.1
ENSGMOG00000002888	elovl6
ENSGMOG00000002889	klhdc10
ENSGMOG00000002890	chd2
ENSGMOG00000002891	ogfod1
ENSGMOG00000002892	klhl41a
ENSGMOG00000002896	tbx2b
ENSGMOG00000002898	cdc42bpb
ENSGMOG00000002899	adora2aa
ENSGMOG00000002901	il1rapl2
ENSGMOG00000002905	ephb4a
ENSGMOG00000002906	slc7a3b
ENSGMOG00000002909	zfhx3
ENSGMOG00000002910	bbs5
ENSGMOG00000002911	dcun1d1
ENSGMOG00000002912	cers2a
ENSGMOG00000002913	cenpp
ENSGMOG00000002914	zc3hc1
ENSGMOG00000002916	agap3
ENSGMOG00000002918	specc1la
ENSGMOG00000002920	rmdn3
ENSGMOG00000002923	bcas3
ENSGMOG00000002925	pick1
ENSGMOG00000002926	rcbtb1
ENSGMOG00000002928	sowahca
ENSGMOG00000002929	med27
ENSGMOG00000002930	eif4a2
ENSGMOG00000002931	runx1t1
ENSGMOG00000002932	asz1
ENSGMOG00000002934	ccbe1
ENSGMOG00000002938	tspan18b
ENSGMOG00000002940	col28a2a
ENSGMOG00000002941	tradd
ENSGMOG00000002942	sept10
ENSGMOG00000002944	C7H17orf49
ENSGMOG00000002945	BCR
ENSGMOG00000002946	slc23a1
ENSGMOG00000002948	scn4aa
ENSGMOG00000002950	arhgap42b
ENSGMOG00000002951	fnbp1a
ENSGMOG00000002953	plbd1
ENSGMOG00000002954	ube2h
ENSGMOG00000002955	cox6b1
ENSGMOG00000002956	rad51
ENSGMOG00000002957	gnao1b
ENSGMOG00000002958	b3gnt5b
ENSGMOG00000002962	wdr3
ENSGMOG00000002963	pnp4b
ENSGMOG00000002966	fam234a
ENSGMOG00000002967	hnf4b
ENSGMOG00000002968	lman1
ENSGMOG00000002969	vipas39
ENSGMOG00000002971	asb10
ENSGMOG00000002972	mrpl42
ENSGMOG00000002973	tbl1xr1b
ENSGMOG00000002976	cog4
ENSGMOG00000002977	aspg
ENSGMOG00000002984	lhx1a
ENSGMOG00000002985	cox4i2
ENSGMOG00000002987	KCNAB3
ENSGMOG00000002988	luc7l
ENSGMOG00000002989	tmem179aa
ENSGMOG00000002992	igfbp2b
ENSGMOG00000002993	slc16a5a
ENSGMOG00000002995	psma8
ENSGMOG00000002996	cplx4b
ENSGMOG00000002997	ptbp2a
ENSGMOG00000003000	TENM2
ENSGMOG00000003002	CPNE8
ENSGMOG00000003005	ckba
ENSGMOG00000003006	frmd8
ENSGMOG00000003008	atp5f1b
ENSGMOG00000003009	pik3ca
ENSGMOG00000003010	lrfn2b
ENSGMOG00000003011	ano6
ENSGMOG00000003012	dis3l
ENSGMOG00000003013	BX294434.1
ENSGMOG00000003014	kctd2
ENSGMOG00000003015	ift81
ENSGMOG00000003016	lgals8b
ENSGMOG00000003017	eps8l1b
ENSGMOG00000003018	ss18
ENSGMOG00000003020	gdap2
ENSGMOG00000003022	CEP170B
ENSGMOG00000003023	mrpl10
ENSGMOG00000003024	tubgcp2
ENSGMOG00000003025	galnt16
ENSGMOG00000003027	ENSDARG00000076547
ENSGMOG00000003030	smyhc1
ENSGMOG00000003032	zmat2
ENSGMOG00000003034	pdk2a
ENSGMOG00000003035	ZNF521
ENSGMOG00000003036	DHX35
ENSGMOG00000003037	pnpo
ENSGMOG00000003039	ints13
ENSGMOG00000003044	slbp2
ENSGMOG00000003045	chrdl2
ENSGMOG00000003046	mrpl53
ENSGMOG00000003049	KCNMB3
ENSGMOG00000003051	cmtr2
ENSGMOG00000003054	cdk5rap3
ENSGMOG00000003057	si:ch211-38m6.6
ENSGMOG00000003058	calb2b
ENSGMOG00000003059	CABZ01084564.1
ENSGMOG00000003060	slc6a16b
ENSGMOG00000003062	adgrg6
ENSGMOG00000003063	fabp11a
ENSGMOG00000003064	adam8b
ENSGMOG00000003066	CABZ01084566.1
ENSGMOG00000003069	tk2
ENSGMOG00000003070	gpm6aa
ENSGMOG00000003072	spag7
ENSGMOG00000003073	ephb2a
ENSGMOG00000003074	hif1al
ENSGMOG00000003076	adamts5
ENSGMOG00000003078	fkbp1ab
ENSGMOG00000003079	rab5if
ENSGMOG00000003080	got2a
ENSGMOG00000003083	kctd3
ENSGMOG00000003084	anapc7
ENSGMOG00000003087	noc4l
ENSGMOG00000003088	slc17a7b
ENSGMOG00000003089	zhx3
ENSGMOG00000003090	enox2
ENSGMOG00000003091	sdcbp2
ENSGMOG00000003095	psmd4b
ENSGMOG00000003097	pcdh1gb9
ENSGMOG00000003101	cbx1b
ENSGMOG00000003102	jam2b
ENSGMOG00000003103	chuk
ENSGMOG00000003104	helb
ENSGMOG00000003105	asic1c
ENSGMOG00000003106	slc38a7
ENSGMOG00000003109	aoc1
ENSGMOG00000003110	apeh
ENSGMOG00000003113	pxmp2
ENSGMOG00000003119	adamts1
ENSGMOG00000003120	zgc:172182
ENSGMOG00000003121	oacyl
ENSGMOG00000003122	eif4ebp3l
ENSGMOG00000003124	clptm1l
ENSGMOG00000003130	acsl4a
ENSGMOG00000003132	jak1
ENSGMOG00000003134	skap1
ENSGMOG00000003135	si:ch211-122f10.4
ENSGMOG00000003139	lrp2a
ENSGMOG00000003140	enc1
ENSGMOG00000003141	CABZ01068356.1
ENSGMOG00000003142	hectd3
ENSGMOG00000003143	gpc1b
ENSGMOG00000003144	crispld2
ENSGMOG00000003147	tbc1d9
ENSGMOG00000003148	cyyr1
ENSGMOG00000003149	hexb
ENSGMOG00000003150	dtd1
ENSGMOG00000003152	sntb1
ENSGMOG00000003154	trappc8
ENSGMOG00000003156	appa
ENSGMOG00000003157	cpsf3
ENSGMOG00000003158	abcb8
ENSGMOG00000003159	si:ch211-241e1.3
ENSGMOG00000003161	tlr9
ENSGMOG00000003163	nxt2
ENSGMOG00000003164	nptx1l
ENSGMOG00000003166	nifk
ENSGMOG00000003167	ephb1
ENSGMOG00000003170	psmd10
ENSGMOG00000003171	jkamp
ENSGMOG00000003173	si:dkey-43p13.5
ENSGMOG00000003174	nedd4l
ENSGMOG00000003175	si:dkeyp-19e1.4
ENSGMOG00000003176	usp10
ENSGMOG00000003177	gfm2
ENSGMOG00000003179	luc7l3
ENSGMOG00000003180	sec14l1
ENSGMOG00000003181	xiap
ENSGMOG00000003184	wfdc1
ENSGMOG00000003186	FAR2
ENSGMOG00000003188	plcxd3
ENSGMOG00000003189	adam17b
ENSGMOG00000003190	piga
ENSGMOG00000003192	atg9b
ENSGMOG00000003193	rad21a
ENSGMOG00000003195	tspan1
ENSGMOG00000003196	stag2b
ENSGMOG00000003197	atp5pf
ENSGMOG00000003198	gphnb
ENSGMOG00000003200	ucp3
ENSGMOG00000003201	dglucy
ENSGMOG00000003202	appb
ENSGMOG00000003207	pomgnt1
ENSGMOG00000003208	elmod2
ENSGMOG00000003209	tspan18a
ENSGMOG00000003210	ergic2
ENSGMOG00000003211	pcdh18a
ENSGMOG00000003212	nsa2
ENSGMOG00000003213	calcoco2
ENSGMOG00000003215	gldc
ENSGMOG00000003221	tor1
ENSGMOG00000003222	tlr9
ENSGMOG00000003226	efnb2b
ENSGMOG00000003228	ncaph2
ENSGMOG00000003230	kaznb
ENSGMOG00000003231	parn
ENSGMOG00000003233	kdm7aa
ENSGMOG00000003235	mpp5b
ENSGMOG00000003237	SLC16A7
ENSGMOG00000003239	gabpa
ENSGMOG00000003240	fam13a
ENSGMOG00000003241	rsu1
ENSGMOG00000003243	pam
ENSGMOG00000003246	snf8
ENSGMOG00000003247	alkbh7
ENSGMOG00000003248	arsj
ENSGMOG00000003249	rrh
ENSGMOG00000003250	zzz3
ENSGMOG00000003254	ubl3b
ENSGMOG00000003255	u2af1
ENSGMOG00000003257	syt10
ENSGMOG00000003259	enpep
ENSGMOG00000003261	msl1b
ENSGMOG00000003264	srp19
ENSGMOG00000003267	rad51d
ENSGMOG00000003268	slc43a1b
ENSGMOG00000003272	coq2
ENSGMOG00000003273	ndufb2
ENSGMOG00000003275	kat5a
ENSGMOG00000003276	hdac1
ENSGMOG00000003277	usp33
ENSGMOG00000003278	si:dkeyp-104h9.5
ENSGMOG00000003279	sik1
ENSGMOG00000003282	agxt2
ENSGMOG00000003283	atp6v1d
ENSGMOG00000003285	sco2
ENSGMOG00000003286	fbxo10
ENSGMOG00000003288	kif6
ENSGMOG00000003289	kmt2e
ENSGMOG00000003290	plod1a
ENSGMOG00000003293	skib
ENSGMOG00000003294	cfl1
ENSGMOG00000003295	chmp2a
ENSGMOG00000003296	kcnj12b
ENSGMOG00000003298	kif19
ENSGMOG00000003300	zgc:101664
ENSGMOG00000003301	lhfpl5a
ENSGMOG00000003302	eif2s1b
ENSGMOG00000003304	herc3
ENSGMOG00000003307	lig3
ENSGMOG00000003308	atl3
ENSGMOG00000003309	orc5
ENSGMOG00000003314	mrm1
ENSGMOG00000003315	pank4
ENSGMOG00000003316	eri2
ENSGMOG00000003317	aldh16a1
ENSGMOG00000003318	tmem41aa
ENSGMOG00000003319	slc26a5
ENSGMOG00000003320	ankrd10b
ENSGMOG00000003321	pik3r1
ENSGMOG00000003322	natd1
ENSGMOG00000003324	vps4b
ENSGMOG00000003325	lrit3b
ENSGMOG00000003328	capza1b
ENSGMOG00000003329	doc2d
ENSGMOG00000003330	FLNB
ENSGMOG00000003331	mfn2
ENSGMOG00000003332	plch2b
ENSGMOG00000003333	dag1
ENSGMOG00000003334	tmem11
ENSGMOG00000003335	miga1
ENSGMOG00000003336	polr1e
ENSGMOG00000003337	nup35
ENSGMOG00000003340	dhrs7b
ENSGMOG00000003342	kpna6
ENSGMOG00000003347	dnajc21
ENSGMOG00000003349	piezo1
ENSGMOG00000003350	kdsr
ENSGMOG00000003352	nisch
ENSGMOG00000003353	fthl27
ENSGMOG00000003356	yif1a
ENSGMOG00000003357	cln8
ENSGMOG00000003359	tmem248
ENSGMOG00000003361	psmc2
ENSGMOG00000003369	thumpd1
ENSGMOG00000003370	fubp1
ENSGMOG00000003373	eif3hb
ENSGMOG00000003374	si:dkey-183j2.10
ENSGMOG00000003375	naxd
ENSGMOG00000003380	lrrc4ca
ENSGMOG00000003382	fosl1a
ENSGMOG00000003386	znf385a
ENSGMOG00000003389	manf
ENSGMOG00000003390	dym
ENSGMOG00000003391	dnajc2
ENSGMOG00000003392	rag2
ENSGMOG00000003395	rag1
ENSGMOG00000003398	ugt8
ENSGMOG00000003399	brpf3a
ENSGMOG00000003400	ndufs3
ENSGMOG00000003402	hcls1
ENSGMOG00000003404	sdc4
ENSGMOG00000003405	prkag2b
ENSGMOG00000003406	fibpa
ENSGMOG00000003409	accs
ENSGMOG00000003410	grhprb
ENSGMOG00000003413	parp8
ENSGMOG00000003414	mapk8ip3
ENSGMOG00000003415	spock3
ENSGMOG00000003417	CABZ01052576.1
ENSGMOG00000003418	borcs5
ENSGMOG00000003419	smoc1
ENSGMOG00000003420	ppme1
ENSGMOG00000003421	zp3e
ENSGMOG00000003422	supt5h
ENSGMOG00000003423	tgm1l3
ENSGMOG00000003425	pmpcb
ENSGMOG00000003426	mdh1aa
ENSGMOG00000003427	prc1b
ENSGMOG00000003428	itih2
ENSGMOG00000003429	efemp2a
ENSGMOG00000003430	cpa2
ENSGMOG00000003431	ppan
ENSGMOG00000003435	slmapa
ENSGMOG00000003438	mon1bb
ENSGMOG00000003439	UBA6
ENSGMOG00000003441	smad7
ENSGMOG00000003443	slc44a1a
ENSGMOG00000003445	ugp2a
ENSGMOG00000003446	paplna
ENSGMOG00000003447	pex26
ENSGMOG00000003448	gys2
ENSGMOG00000003451	dnajb13
ENSGMOG00000003452	ctif
ENSGMOG00000003453	LO017843.1
ENSGMOG00000003456	hcfc2
ENSGMOG00000003457	vps33b
ENSGMOG00000003459	pik3r4
ENSGMOG00000003460	smc1b
ENSGMOG00000003465	si:dkeyp-94g1.1
ENSGMOG00000003468	usp18
ENSGMOG00000003469	eif3g
ENSGMOG00000003472	vps54
ENSGMOG00000003473	ube2e1
ENSGMOG00000003474	nme3
ENSGMOG00000003475	agbl5
ENSGMOG00000003479	echs1
ENSGMOG00000003480	sspn
ENSGMOG00000003481	kin
ENSGMOG00000003482	osbpl1a
[truncated: 15,129 more rows]

## Sheet: Largemouth bass
Msalmoides gene	Zebrafish gene	Mouse gene	Human gene
UF_Msa_AF_102796	fb59e09	1810013L24Rik	C16orf72
UF_Msa_AF_100486	STMP1	1810058I24Rik	STMP1
UF_Msa_AF_106290	si:ch211-215a10.4	2310061I04Rik	C6orf136
UF_Msa_CF_123366	si:ch211-215a10.4	2310061I04Rik	C6orf136
UF_Msa_AF_108582	zgc:109986	2700097O09Rik
UF_Msa_CF_118949	si:ch73-138n13.1	2900026A02Rik	KIAA1671
UF_Msa_CF_120529	si:ch73-138n13.1	2900026A02Rik	KIAA1671
UF_Msa_AF_107715	zgc:123105	4833439L19Rik	KIAA1191
UF_Msa_CF_122407	org	4930563M21Rik
UF_Msa_AF_106267	si:ch211-233a24.2	4932438A13Rik	KIAA1109
UF_Msa_AF_106709	si:ch211-233a24.2	4932438A13Rik	KIAA1109
UF_Msa_AF_101922	si:dkey-243i1.1	4933427D14Rik	KIAA0753
UF_Msa_AF_106273	zgc:123238	4933434E20Rik	C1orf43
UF_Msa_AF_100410	zgc:112163	A130010J15Rik	C1orf74
UF_Msa_AF_104782	si:ch211-147a11.3	A430005L14Rik	C1orf174
UF_Msa_AF_110004	aaas	Aaas	AAAS
UF_Msa_AF_107196	aagab	Aagab	AAGAB
UF_Msa_CF_126057	aamdc	Aamdc	AAMDC
UF_Msa_AF_108008	aar2	Aar2	AAR2
UF_Msa_AF_101023	aar2	Aar2	AAR2
UF_Msa_AF_104961	aatf	Aatf	AATF
UF_Msa_AF_109060	abca2	Abca2	ABCA2
UF_Msa_AF_103295	abcc8	Abcc8	ABCC8
UF_Msa_AF_102341	abcc8b	Abcc8	ABCC8
UF_Msa_AF_108984	abce1	Abce1	ABCE1
UF_Msa_AF_102540	abce1	Abce1	ABCE1
UF_Msa_AF_101555	abce1	Abce1	ABCE1
UF_Msa_AF_108461	abcf1	Abcf1	ABCF1
UF_Msa_AF_106378	abcf1	Abcf1	ABCF1
UF_Msa_AF_101816	abcf2b	Abcf2	ABCF2
UF_Msa_AF_106394	abcf2b	Abcf2	ABCF2
UF_Msa_AF_107427	abhd10a	Abhd10	ABHD10
UF_Msa_AF_100237	abhd10a	Abhd10	ABHD10
UF_Msa_AF_101241	abhd12	Abhd12	ABHD12
UF_Msa_AF_105001	abhd13	Abhd13	ABHD13
UF_Msa_AF_108198	abhd13	Abhd13	ABHD13
UF_Msa_AF_109613	abhd17b	Abhd17b	ABHD17B
UF_Msa_AF_109185	abi1a	Abi1	ABI1
UF_Msa_AD_200118	abi1a	Abi1	ABI1
UF_Msa_AD_200203	abi1a	Abi1	ABI1
UF_Msa_AF_100936	abitram	Abitram	ABITRAM
UF_Msa_AF_108609	ablim1b	Ablim1	ABLIM1
UF_Msa_AF_107202	acad9	Acad9	ACAD9
UF_Msa_AF_102455	zgc:85777	Acads	ACADS
UF_Msa_AF_109304	acads	Acads	ACADS
UF_Msa_AF_108254	zgc:85777	Acads	ACADS
UF_Msa_AF_105159	acadsb	Acadsb	ACADSB
UF_Msa_AF_105485	acadsb	Acadsb	ACADSB
UF_Msa_AF_109431	acat1	Acat1	ACAT1
UF_Msa_AF_105118	acat2	Acat2	ACAT2
UF_Msa_AF_102825	acat2	Acat2	ACAT2
UF_Msa_AF_103767	acbd7	Acbd7	ACBD7
UF_Msa_AF_108708	accs	Accs	ACCS
UF_Msa_AF_100216	acot15	Acnat2	ACOT2
UF_Msa_AF_100327	acot15	Acnat2	ACOT2
UF_Msa_AF_103206	aco1	Aco1	ACO1
UF_Msa_AF_106821	aco2	Aco2	ACO2
UF_Msa_AF_104806	acot11b	Acot11	ACOT11
UF_Msa_AF_106858	acp5a	Acp5	ACP5
UF_Msa_AF_106264	acp6	Acp6	ACP6
UF_Msa_AF_108041	acsbg2	Acsbg2	ACSBG2
UF_Msa_AF_107393	acsl3b	Acsl3	ACSL3
UF_Msa_AF_103876	acsl5	Acsl5	ACSL5
UF_Msa_AF_105143	acsl5	Acsl5	ACSL5
UF_Msa_AF_104423	actb2	Actb	ACTB
UF_Msa_AF_110089	actb1	Actb	ACTB
UF_Msa_AF_103913	actb2	Actb	ACTB
UF_Msa_AD_200186	actb2	Actb	ACTB
UF_Msa_AF_107855	actb2	Actb	ACTB
UF_Msa_AD_200179	actb2	Actb	ACTB
UF_Msa_AF_103757	actb1	Actb	ACTB
UF_Msa_AF_109734	actb2	Actb	ACTB
UF_Msa_AF_105830	actb2	Actb	ACTB
UF_Msa_AF_105236	zgc:86709	Actc1	ACTC1
UF_Msa_CF_118723	zgc:86709	Actc1	ACTC1
UF_Msa_AF_102354	actn1	Actn1	ACTN1
UF_Msa_CF_118038	actn3b	Actn3	ACTN3
UF_Msa_AF_101863	actn3b	Actn3	ACTN3
UF_Msa_AF_101843	actr10	Actr10	ACTR10
UF_Msa_AF_105870	actr1	Actr1b	ACTR1B
UF_Msa_AF_100156	actr5	Actr5	ACTR5
UF_Msa_AF_109101	actr6	Actr6	ACTR6
UF_Msa_CF_122234	si:ch211-241j12.3	Actrt3	ACTRT3
UF_Msa_AF_105109	adad2	Adad2	ADAD2
UF_Msa_AF_104001	adam10b	Adam10	ADAM10
UF_Msa_AF_103540	adarb1a	Adarb1	ADARB1
UF_Msa_AF_104004	adat2	Adat2	ADAT2
UF_Msa_AF_102764	adcyap1b	Adcyap1	ADCYAP1
UF_Msa_AF_100706	adcyap1r1a	Adcyap1r1	ADCYAP1R1
UF_Msa_CF_123245	add2	Add2	ADD2
UF_Msa_AF_105770	add3a	Add3	ADD3
UF_Msa_AF_108069	adgrb3	Adgrb3	ADGRB3
UF_Msa_AF_103734	adgrg1	Adgrg1	ADGRG1
UF_Msa_AF_105105	adgrl2a	Adgrl2	ADGRL2
UF_Msa_AF_103406	adgrl3.1	Adgrl3	ADGRL3
UF_Msa_AF_107929	adh8a	Adh1	ADH1C
UF_Msa_AF_102310	adh8a	Adh1	ADH1C
UF_Msa_AF_105389	adh8a	Adh1	ADH1C
UF_Msa_AF_100854	zgc:77938	Adh5	ADH5
UF_Msa_AF_102655	adipor2	Adipor2	ADIPOR2
UF_Msa_AF_106959	adipor2	Adipor2	ADIPOR2
UF_Msa_CF_122123	adnp2a	Adnp2	ADNP2
UF_Msa_AF_103051	adpgk	Adpgk	ADPGK
UF_Msa_CF_120986	adprm	Adprm	ADPRM
UF_Msa_AF_100093	adsl	Adsl	ADSL
UF_Msa_AF_102575	adss2	Adss	ADSS2
UF_Msa_CF_120255	adss2	Adss	ADSS2
UF_Msa_CF_117853	afdna	Afdn	AFDN
UF_Msa_CF_119005	afdna	Afdn	AFDN
UF_Msa_AF_104875	aff2	Aff2	AFF2
UF_Msa_AF_105478	aga	Aga	AGA
UF_Msa_AF_110206	si:ch211-79k12.1	Ager	AGER
UF_Msa_AF_107761	agfg1a	Agfg1	AGFG1
UF_Msa_AF_103835	agfg1a	Agfg1	AGFG1
UF_Msa_AF_109151	agtrap	Agtrap	AGTRAP
UF_Msa_AF_105897	ahcyl1	Ahcyl1	AHCYL1
UF_Msa_AF_101226	ahsa1a	Ahsa1	AHSA1
UF_Msa_AF_104117	aifm1	Aifm1	AIFM1
UF_Msa_AF_107877	aig1	Aig1	AIG1
UF_Msa_CF_117808	aimp1a	Aimp1	AIMP1
UF_Msa_AF_106419	aimp1a	Aimp1	AIMP1
UF_Msa_AF_100899	ak1	Ak1	AK1
UF_Msa_AF_101406	ak2	Ak2	AK2
UF_Msa_AF_101302	ak4	Ak4	AK4
UF_Msa_AF_100107	ak5	Ak5	AK5
UF_Msa_CF_119434	ak5	Ak5	AK5
UF_Msa_AF_100472	AK6	Ak6	AK6
UF_Msa_CF_120871	akap11	Akap11	AKAP11
UF_Msa_AF_106573	akap17a	Akap17b	AKAP17A
UF_Msa_AF_106200	akap9	Akap9	AKAP9
UF_Msa_AF_109415	akirin1	Akirin1	AKIRIN1
UF_Msa_AF_107010	akirin1	Akirin1	AKIRIN1
UF_Msa_AF_108999	akirin2	Akirin2	AKIRIN2
UF_Msa_AF_103968	akirin2	Akirin2	AKIRIN2
UF_Msa_AF_110138	akirin2	Akirin2	AKIRIN2
UF_Msa_AF_100027	akr1a1b	Akr1a1	AKR1A1
UF_Msa_AF_104634	zgc:110782	Akr1b10	AKR1B10
UF_Msa_AF_102813	akr1b1.1	Akr1b3	AKR1B1
UF_Msa_AF_106528	akr1b1.2	Akr1b3	AKR1B1
UF_Msa_AF_106969	akr1b1.1	Akr1b3	AKR1B1
UF_Msa_AF_107421	akr7a3	Akr7a5	AKR7A2
UF_Msa_AF_103736	akr7a3	Akr7a5	AKR7A2
UF_Msa_AF_108013	akr7a3	Akr7a5	AKR7A2
UF_Msa_AF_100857	akt2l	Akt2	AKT2
UF_Msa_AF_109225	akt3b	Akt3	AKT3
UF_Msa_AF_100574	aktip	Aktip	AKTIP
UF_Msa_AF_109320	alad	Alad	ALAD
UF_Msa_AF_102497	alas1	Alas1	ALAS1
UF_Msa_AF_100890	alas1	Alas1	ALAS1
UF_Msa_AF_106542	alas2	Alas2	ALAS2
UF_Msa_CF_126393	aldh16a1	Aldh16a1	ALDH16A1
UF_Msa_AF_101727	aldh18a1	Aldh18a1	ALDH18A1
UF_Msa_CF_118178	aldh18a1	Aldh18a1	ALDH18A1
UF_Msa_AF_102352	aldh2.1	Aldh2	ALDH2
UF_Msa_AF_102474	aldh2.1	Aldh2	ALDH2
UF_Msa_AF_101328	aldh3a2b	Aldh3a2	ALDH3A2
UF_Msa_AF_109695	aldh3b1	Aldh3b1	ALDH3B1
UF_Msa_AF_108413	aldh3b2	Aldh3b2	ALDH3B2
UF_Msa_AF_102549	aldh3b2	Aldh3b2	ALDH3B2
UF_Msa_AF_100052	aldh3b2	Aldh3b2	ALDH3B2
UF_Msa_CF_120932	aldh6a1	Aldh6a1	ALDH6A1
UF_Msa_AF_109632	aldh7a1	Aldh7a1	ALDH7A1
UF_Msa_AF_103341	aldh7a1	Aldh7a1	ALDH7A1
UF_Msa_AF_109091	aldh7a1	Aldh7a1	ALDH7A1
UF_Msa_AF_104450	aldoaa	Aldoart2	ALDOA
UF_Msa_AF_109135	aldob	Aldob	ALDOB
UF_Msa_AD_200178	aldob	Aldob	ALDOB
UF_Msa_AD_200322	aldob	Aldob	ALDOB
UF_Msa_AF_103595	aldocb	Aldoc	ALDOC
UF_Msa_AF_107162	aldocb	Aldoc	ALDOC
UF_Msa_AF_102753	alg1	Alg1	ALG1
UF_Msa_AF_108126	alg14	Alg14	ALG14
UF_Msa_AF_100931	alg8	Alg8	ALG8
UF_Msa_AF_108226	alkbh2	Alkbh2	ALKBH2
UF_Msa_AF_107600	alkbh3	Alkbh3	ALKBH3
UF_Msa_AF_102812	alkbh7	Alkbh7	ALKBH7
UF_Msa_AF_100073	alkbh8	Alkbh8	ALKBH8
UF_Msa_AF_100861	alkbh8	Alkbh8	ALKBH8
UF_Msa_CF_122883	alox5a	Alox5	ALOX5
UF_Msa_AF_104922	alpk3b	Alpk3	ALPK3
UF_Msa_AF_106215	alyref	Alyref	ALYREF
UF_Msa_AF_110029	alyref	Alyref	ALYREF
UF_Msa_AF_109252	amacr	Amacr	AMACR
UF_Msa_CF_126800	ambp	Ambp	AMBP
UF_Msa_AD_200332	ambp	Ambp	AMBP
UF_Msa_CF_126809	ambp	Ambp	AMBP
UF_Msa_CF_122361	ambp	Ambp	AMBP
UF_Msa_CF_126866	ambp	Ambp	AMBP
UF_Msa_CF_122971	ambp	Ambp	AMBP
UF_Msa_AF_109403	ambp	Ambp	AMBP
UF_Msa_AD_200336	ambp	Ambp	AMBP
UF_Msa_CF_118752	amer2	Amer2	AMER2
UF_Msa_AF_107304	ammecr1	Ammecr1	AMMECR1
UF_Msa_AF_107841	zgc:92137	Amy1	AMY1A
UF_Msa_AF_108767	amy2a	Amy2a2	AMY2B
UF_Msa_AF_100227	amy2a	Amy2a2	AMY2B
UF_Msa_AF_108515	anapc13	Anapc13	ANAPC13
UF_Msa_AF_101785	anapc15	Anapc15	ANAPC15
UF_Msa_AF_108147	anapc16	Anapc16	ANAPC16
UF_Msa_AF_102047	anapc7	Anapc7	ANAPC7
UF_Msa_CF_124565	anapc7	Anapc7	ANAPC7
UF_Msa_AF_100295	angptl3	Angptl3	ANGPTL3
UF_Msa_AF_104935	ankhb	Ank	ANKH
UF_Msa_AF_105267	ankhd1	Ankhd1	ANKHD1-EIF4EBP3
UF_Msa_AF_106642	ankhd1	Ankhd1	ANKHD1-EIF4EBP3
UF_Msa_AF_108810	ankrd12	Ankrd12	ANKRD12
UF_Msa_CF_122186	ankrd12	Ankrd12	ANKRD12
UF_Msa_AF_105173	ankrd13d	Ankrd13d	ANKRD13D
UF_Msa_AF_102761	ankrd46b	Ankrd46	ANKRD46
UF_Msa_AF_102522	ankrd49	Ankrd49	ANKRD49
UF_Msa_AF_109709	ankrd52a	Ankrd52	ANKRD52
UF_Msa_AF_109962	anks1b	Anks1b	ANKS1B
UF_Msa_AF_104709	anks1b	Anks1b	ANKS1B
UF_Msa_AF_106246	ankzf1	Ankzf1	ANKZF1
UF_Msa_AF_102054	anp32a	Anp32a	ANP32A
UF_Msa_AF_103818	anp32a	Anp32a	ANP32A
UF_Msa_AF_101563	anp32b	Anp32b	ANP32B
UF_Msa_AF_103286	anxa1d	Anxa1	ANXA1
UF_Msa_AF_102985	anxa13	Anxa13	ANXA13
UF_Msa_AF_108723	anxa2a	Anxa2	ANXA2
UF_Msa_CF_124236	anxa3b	Anxa3	ANXA3
UF_Msa_AF_100753	anxa3a	Anxa3	ANXA3
UF_Msa_AF_107757	anxa3b	Anxa3	ANXA3
UF_Msa_CF_126381	anxa5b	Anxa5	ANXA5
UF_Msa_AF_107306	anxa5b	Anxa5	ANXA5
UF_Msa_AF_100085	ap1g1	Ap1g1	AP1G1
UF_Msa_AF_106062	ap1m1	Ap1m1	AP1M1
UF_Msa_AF_102615	ap1m2	Ap1m2	AP1M2
UF_Msa_AF_101446	ap1s3b	Ap1s3	AP1S3
UF_Msa_AF_102692	ap1s3b	Ap1s3	AP1S3
UF_Msa_AF_109893	ap1s3b	Ap1s3	AP1S3
UF_Msa_AF_109727	ap2a1	Ap2a1	AP2A1
UF_Msa_AF_105085	ap2a1	Ap2a1	AP2A1
UF_Msa_AF_106204	ap2m1a	Ap2m1	AP2M1
UF_Msa_AF_105915	ap2s1	Ap2s1	AP2S1
UF_Msa_AF_103311	AP3B2	Ap3b2	AP3B2
UF_Msa_AF_108587	ap3d1	Ap3d1	AP3D1
UF_Msa_AF_105055	ap3d1	Ap3d1	AP3D1
UF_Msa_AF_104962	ap3m2	Ap3m2	AP3M2
UF_Msa_AF_108535	ap3s2	Ap3s2	AP3S2
UF_Msa_AF_106317	ap4b1	Ap4b1	AP4B1
UF_Msa_CF_121536	ap5z1	Ap5z1	AP5Z1
UF_Msa_AF_107653	apc2	Apc2	APC2
UF_Msa_AF_106023	apex1	Apex1	APEX1
UF_Msa_AF_107553	apex2	Apex2	APEX2
UF_Msa_AF_101376	aph1b	Aph1b	APH1B
UF_Msa_AF_104735	api5	Api5	API5
UF_Msa_AD_200048	aplnrb	Aplnr	APLNR
UF_Msa_AD_200037	aplnrb	Aplnr	APLNR
UF_Msa_CF_119643	aplp1	Aplp1	APLP1
UF_Msa_AF_100544	aplp1	Aplp1	APLP1
UF_Msa_AF_105794	aplp2	Aplp2	APLP2
UF_Msa_AF_104942	apmap	Apmap	APMAP
UF_Msa_AF_102794	apmap	Apmap	APMAP
UF_Msa_AD_200123	apoa1b	Apoa1	APOA1
UF_Msa_AD_200087	apoa1b	Apoa1	APOA1
UF_Msa_AD_200340	apoa1a	Apoa1	APOA1
UF_Msa_AF_100561	apoa1a	Apoa1	APOA1
UF_Msa_AD_200001	apoa1a	Apoa1	APOA1
UF_Msa_AF_108415	apoa1a	Apoa1	APOA1
UF_Msa_AF_102994	vtg7	Apob	APOB
UF_Msa_AD_200294	vtg2	Apob	APOB
UF_Msa_CF_118864	vtg1	Apob	APOB
UF_Msa_AD_200165	vtg2	Apob	APOB
UF_Msa_AF_102498	vtg4	Apob	APOB
UF_Msa_AF_103776	apobb.1	Apob	APOB
UF_Msa_AF_104370	vtg2	Apob	APOB
UF_Msa_AD_200180	vtg2	Apob	APOB
UF_Msa_AD_200391	vtg2	Apob	APOB
UF_Msa_AF_105492	apoc2	Apoc2	APOC2
UF_Msa_AF_106467	apodb	Apod	APOD
UF_Msa_AD_200132	apoea	Apoe	APOE
UF_Msa_AF_101299	apoea	Apoe	APOE
UF_Msa_AD_200084	apoea	Apoe	APOE
UF_Msa_CF_122867	si:rp71-1g18.13	Apol11a	APOL4
UF_Msa_CF_125104	si:rp71-1g18.13	Apol11a	APOL4
UF_Msa_AF_108410	si:ch73-233k15.2	Apol7a	APOL3
UF_Msa_AF_103319	apooa	Apoo	APOO
UF_Msa_AF_108616	apool	Apool	APOOL
UF_Msa_AF_105852	aprt	Aprt	APRT
UF_Msa_AF_108518	aptx	Aptx	APTX
UF_Msa_AF_102124	aqp1a.1	Aqp1	AQP1
UF_Msa_AF_101188	aqp1a.1	Aqp1	AQP1
UF_Msa_AF_105666	aqp1a.1	Aqp1	AQP1
UF_Msa_AF_100685	ar	Ar	AR
UF_Msa_AF_104320	araf	Araf	ARAF
UF_Msa_AF_100319	araf	Araf	ARAF
UF_Msa_AF_110259	arcn1a	Arcn1	ARCN1
UF_Msa_AF_106728	arcn1a	Arcn1	ARCN1
UF_Msa_AF_104400	arf2a	Arf1	ARF1
UF_Msa_CF_117688	arf1	Arf1	ARF1
UF_Msa_AF_104353	arf4a	Arf4	ARF4
UF_Msa_AF_102313	arf5	Arf5	ARF5
UF_Msa_CF_121670	arfgap2	Arfgap2	ARFGAP2
UF_Msa_AF_109589	arfgap2	Arfgap2	ARFGAP2
UF_Msa_AF_109308	arfgap3	Arfgap3	ARFGAP3
UF_Msa_AF_102931	arfgef1	Arfgef1	ARFGEF1
UF_Msa_AF_102307	arg2	Arg2	ARG2
UF_Msa_AF_109538	arhgap11a	Arhgap11a	ARHGAP11A
UF_Msa_CF_123311	arhgap11a	Arhgap11a	ARHGAP11A
UF_Msa_AF_107267	arhgap12b	Arhgap12	ARHGAP12
UF_Msa_AF_108326	arhgap17a	Arhgap17	ARHGAP17
UF_Msa_AF_103447	arhgap19	Arhgap19	ARHGAP19
UF_Msa_AF_105248	arhgap21b	Arhgap21	ARHGAP21
UF_Msa_AF_100370	arhgap24	Arhgap24	ARHGAP24
UF_Msa_CF_124164	arhgap29b	Arhgap29	ARHGAP29
UF_Msa_CF_118940	arhgap29a	Arhgap29	ARHGAP29
UF_Msa_AF_106835	arhgap45b	Arhgap45	ARHGAP45
UF_Msa_AF_100838	arhgap45b	Arhgap45	ARHGAP45
UF_Msa_CF_119709	arhgef12b	Arhgef12	ARHGEF12
UF_Msa_CF_118759	arhgef15	Arhgef15	ARHGEF15
UF_Msa_AF_109342	si:dkey-38p12.3	Arhgef15	ARHGEF15
UF_Msa_CF_126113	arhgef18a	Arhgef18	ARHGEF18
UF_Msa_AF_100183	arhgef3l	Arhgef3	ARHGEF3
UF_Msa_AF_100253	arhgef39	Arhgef39	ARHGEF39
UF_Msa_CF_118015	arhgef7a	Arhgef7	ARHGEF7
UF_Msa_AF_103107	arhgef7a	Arhgef7	ARHGEF7
UF_Msa_AF_107955	arid1aa	Arid1a	ARID1A
UF_Msa_AF_108570	arid1ab	Arid1a	ARID1A
UF_Msa_AF_100913	arid1ab	Arid1a	ARID1A
UF_Msa_AF_100329	arid2	Arid2	ARID2
UF_Msa_CF_124898	arid4a	Arid4a	ARID4A
UF_Msa_AF_109397	tomm20a	Arid4b	ARID4B
UF_Msa_AF_109344	tomm20a	Arid4b	ARID4B
UF_Msa_AF_101246	arl1	Arl1	ARL1
UF_Msa_AF_110253	arl13b	Arl13b	ARL13B
UF_Msa_AF_101686	arl14ep	Arl14ep	ARL14EP
UF_Msa_AF_101535	arl16	Arl16	ARL16
UF_Msa_AF_101522	arl2	Arl2	ARL2
UF_Msa_AF_102789	arl3a	Arl3	ARL3
UF_Msa_AF_100930	arl4d	Arl4d	ARL4D
UF_Msa_AF_107944	arl4d	Arl4d	ARL4D
UF_Msa_AF_101311	arl8	Arl5b	ARL5B
UF_Msa_AF_103636	arl6ip1	Arl6ip1	ARL6IP1
UF_Msa_AF_107450	arl6ip1	Arl6ip1	ARL6IP1
UF_Msa_AF_101321	arl6ip5a	Arl6ip5	ARL6IP5
UF_Msa_AF_101266	arl8ba	Arl8b	ARL8B
UF_Msa_AF_100949	arl9	Arl9	ARL9
UF_Msa_AF_102658	armc1l	Armc1	ARMC1
UF_Msa_AF_106382	armc1l	Armc1	ARMC1
UF_Msa_AF_100972	armc8	Armc8	ARMC8
UF_Msa_AF_105476	armt1	Armt1	ARMT1
UF_Msa_CF_118800	armt1	Armt1	ARMT1
UF_Msa_AF_102592	zgc:86896	Arpc1a	ARPC1A
UF_Msa_AF_109883	arpc1b	Arpc1b	ARPC1B
UF_Msa_CF_118132	arpc3	Arpc3	ARPC3
UF_Msa_AF_101167	arpc3	Arpc3	ARPC3
UF_Msa_AF_103720	arpc4l	Arpc4	ARPC4
UF_Msa_AF_101495	arpc5b	Arpc5	ARPC5
UF_Msa_AF_106700	arpp19a	Arpp19	ARPP19
UF_Msa_AF_109717	arpp19b	Arpp19	ARPP19
UF_Msa_AF_107978	arrb2b	Arrb2	ARRB2
UF_Msa_AD_200007	arrdc1a	Arrdc1	ARRDC1
UF_Msa_AD_200394	arrdc1a	Arrdc1	ARRDC1
UF_Msa_AF_106211	arsa	Arsa	ARSA
UF_Msa_AF_106271	ARSB	Arsb	ARSB
UF_Msa_AF_102755	arsk	Arsk	ARSK
UF_Msa_AF_102030	arvcfb	Arvcf	ARVCF
UF_Msa_AF_104687	asah1a	Asah1	ASAH1
UF_Msa_AF_101942	asah1b	Asah1	ASAH1
UF_Msa_CF_121261	asap1b	Asap1	ASAP1
UF_Msa_AF_107552	asap2a	Asap2	ASAP2
UF_Msa_AF_108132	asb12a	Asb12	ASB12
UF_Msa_AF_109413	asb13b	Asb13	ASB13
UF_Msa_CF_120050	asb13a.1	Asb13	ASB13
UF_Msa_AF_107949	asb2a.1	Asb2	ASB2
UF_Msa_AF_100242	asb6	Asb6	ASB6
UF_Msa_AF_103628	asb6	Asb6	ASB6
UF_Msa_AF_102799	asf1bb	Asf1a	ASF1A
UF_Msa_AF_102249	asf1bb	Asf1a	ASF1A
UF_Msa_AD_200109	asgrl1	Asgr2	ASGR2
UF_Msa_AD_200067	asgrl1	Asgr2	ASGR2
UF_Msa_AF_107741	asgrl1	Asgr2	ASGR2
UF_Msa_AF_108355	ash2l	Ash2l	ASH2L
UF_Msa_AF_102611	asl	Asl	ASL
UF_Msa_CF_119222	si:dkey-32e6.6	Aspn	ASPN
UF_Msa_AF_109994	aspscr1	Aspscr1	ASPSCR1
UF_Msa_AF_100774	asrgl1	Asrgl1	ASRGL1
UF_Msa_AF_109420	ASS1	Ass1	ASS1
UF_Msa_AF_100712	ASS1	Ass1	ASS1
UF_Msa_AF_107721	atad1b	Atad1	ATAD1
UF_Msa_CF_121913	atad2	Atad2	ATAD2
UF_Msa_AF_100090	atad3	Atad3a	ATAD3A
UF_Msa_AF_109959	ATE1	Ate1	ATE1
UF_Msa_AF_107342	atf1	Atf1	ATF1
UF_Msa_AF_103331	atf1	Atf1	ATF1
UF_Msa_AF_102837	atf1	Atf1	ATF1
UF_Msa_AF_106413	atf2	Atf2	ATF2
UF_Msa_AF_106226	atf4a	Atf4	ATF4
UF_Msa_CF_119301	atf4b	Atf4	ATF4
UF_Msa_AF_104566	atg101	Atg101	ATG101
UF_Msa_AF_103654	atg13	Atg13	ATG13
UF_Msa_AF_102962	si:ch1073-143l10.2	Atg16l1	ATG16L1
UF_Msa_CF_124816	atg16l1	Atg16l1	ATG16L1
UF_Msa_CF_124206	ATG2A	Atg2a	ATG2A
UF_Msa_CF_120435	ATG2A	Atg2a	ATG2A
UF_Msa_AF_110172	atic	Atic	ATIC
UF_Msa_AF_102436	atm	Atm	ATM
UF_Msa_CF_121264	atn1	Atn1	ATN1
UF_Msa_AF_102284	atp1a1a.4	Atp1a1	ATP1A1
UF_Msa_AF_100969	atp1a1a.1	Atp1a1	ATP1A1
UF_Msa_AF_109920	atp1a1a.1	Atp1a1	ATP1A1
UF_Msa_AF_106905	atp1a3a	Atp1a3	ATP1A3
UF_Msa_CF_119730	atp1a3a	Atp1a3	ATP1A3
UF_Msa_AF_105245	atp1a3a	Atp1a3	ATP1A3
UF_Msa_AF_110191	atp1b1a	Atp1b1	ATP1B1
UF_Msa_AF_101043	atp1b3b	Atp1b3	ATP1B3
UF_Msa_CF_123828	atp1b3a	Atp1b3	ATP1B3
UF_Msa_AF_107467	atp1b4	Atp1b4	ATP1B4
UF_Msa_AF_109716	atp1b4	Atp1b4	ATP1B4
UF_Msa_AF_108693	atp23	Atp23	ATP23
UF_Msa_AF_103316	atp2a1	Atp2a1	ATP2A1
UF_Msa_AF_103152	atp2a2a	Atp2a2	ATP2A2
UF_Msa_AF_105696	atp2b1b	Atp2b1	ATP2B1
UF_Msa_CF_121388	atp2b1a	Atp2b1	ATP2B1
UF_Msa_CF_121659	atp2b3b	Atp2b3	ATP2B3
UF_Msa_AF_106802	atp2b4	Atp2b4	ATP2B4
UF_Msa_CF_117797	atp2c1	Atp2c1	ATP2C1
UF_Msa_AD_200015	atp5fa1	Atp5a1	ATP5F1A
UF_Msa_AF_106717	atp5fa1	Atp5a1	ATP5F1A
UF_Msa_AF_107989	atp5fa1	Atp5a1	ATP5F1A
UF_Msa_AD_200225	atp5fa1	Atp5a1	ATP5F1A
UF_Msa_AF_104880	atp5f1b	Atp5b	ATP5F1B
UF_Msa_AF_104700	atp5f1b	Atp5b	ATP5F1B
UF_Msa_AF_107234	atp5f1b	Atp5b	ATP5F1B
UF_Msa_AF_104255	atp5f1b	Atp5b	ATP5F1B
UF_Msa_AF_103241	atp5f1c	Atp5c1	ATP5F1C
UF_Msa_AF_102065	atp5f1c	Atp5c1	ATP5F1C
UF_Msa_AF_107795	atp5f1c	Atp5c1	ATP5F1C
UF_Msa_AF_109621	atp5f1d	Atp5d	ATP5F1D
UF_Msa_AF_105201	atp5mc1	Atp5g1	ATP5MC1
UF_Msa_AF_103533	atp5mc3a	Atp5g3	ATP5MC3
UF_Msa_AF_109039	atp5mc3b	Atp5g3	ATP5MC3
UF_Msa_AF_106429	atp5mc3b	Atp5g3	ATP5MC3
UF_Msa_AF_103761	atp5mc3b	Atp5g3	ATP5MC3
UF_Msa_AF_106153	atp5pd	Atp5h	ATP5PD
UF_Msa_CF_121612	atp5pd	Atp5h	ATP5PD
UF_Msa_CF_122793	atp5pd	Atp5h	ATP5PD
UF_Msa_AF_108798	atp5pf	Atp5j	ATP5PF
UF_Msa_AF_100417	atp5mf	Atp5j2	ATP5MF
UF_Msa_AF_105443	atp5mf	Atp5j2	ATP5MF
UF_Msa_AD_200150	atp5meb	Atp5k	ATP5ME
UF_Msa_AF_108046	atp5meb	Atp5k	ATP5ME
UF_Msa_AF_104292	atp5meb	Atp5k	ATP5ME
UF_Msa_AD_200111	atp5meb	Atp5k	ATP5ME
UF_Msa_CF_119585	atp5meb	Atp5k	ATP5ME
UF_Msa_AF_101214	atp5l	Atp5l	ATP5MG
UF_Msa_AF_106477	atp5md	Atp5md	ATP5MK
UF_Msa_AD_200298	atp5po	Atp5o	ATP5PO
UF_Msa_AF_102907	atp5po	Atp5o	ATP5PO
UF_Msa_AF_103423	atp5po	Atp5o	ATP5PO
UF_Msa_AD_200281	atp5po	Atp5o	ATP5PO
UF_Msa_AF_105415	atp5pb	Atp5pb	ATP5PB
UF_Msa_AF_100653	atp6v0a1a	Atp6v0a1	ATP6V0A1
UF_Msa_AF_105306	atp6v0a2a	Atp6v0a2	ATP6V0A2
UF_Msa_AF_107928	atp6v0b	Atp6v0b	ATP6V0B
UF_Msa_AF_110198	atp6v0ca	Atp6v0c	ATP6V0C
UF_Msa_AF_103679	atp6v0ca	Atp6v0c	ATP6V0C
UF_Msa_AF_108862	atp6v0d1	Atp6v0d1	ATP6V0D1
UF_Msa_AF_102944	atp6v0d1	Atp6v0d1	ATP6V0D1
UF_Msa_AF_109877	atp6v1ab	Atp6v1a	ATP6V1A
UF_Msa_AF_104360	atp6v1aa	Atp6v1a	ATP6V1A
UF_Msa_AF_106171	atp6v1b2	Atp6v1b2	ATP6V1B2
UF_Msa_AF_100279	atp6v1ba	Atp6v1b2	ATP6V1B2
UF_Msa_AF_106807	atp6v1c1a	Atp6v1c1	ATP6V1C1
UF_Msa_AF_102097	atp6v1d	Atp6v1d	ATP6V1D
UF_Msa_AF_107779	atp6v1d	Atp6v1d	ATP6V1D
UF_Msa_AF_107786	atp6v1e1a	Atp6v1e1	ATP6V1E1
UF_Msa_AF_109812	atp6v1f	Atp6v1f	ATP6V1F
UF_Msa_AF_103530	atp6v1h	Atp6v1h	ATP6V1H
UF_Msa_CF_123685	atp7a	Atp7a	ATP7A
UF_Msa_CF_118289	atpaf1	Atpaf1	ATPAF1
UF_Msa_AF_102280	atpaf2	Atpaf2	ATPAF2
UF_Msa_AF_101113	atpaf2	Atpaf2	ATPAF2
UF_Msa_AF_105636	atpaf2	Atpaf2	ATPAF2
UF_Msa_AF_104463	atp5if1a	Atpif1	ATP5IF1
UF_Msa_AF_101661	atrx	Atrx	ATRX
UF_Msa_CF_119101	atrx	Atrx	ATRX
UF_Msa_AF_103400	atrx	Atrx	ATRX
UF_Msa_AF_101373	atrx	Atrx	ATRX
UF_Msa_AF_105215	atxn7l3	Atxn7l3	ATXN7L3
UF_Msa_CF_127322	zgc:175280	AU018091	SLC7A3
UF_Msa_AF_104543	auh	Auh	AUH
UF_Msa_AF_104072	aurkaip1	Aurkaip1	AURKAIP1
UF_Msa_AF_104627	aurkb	Aurkb	AURKB
UF_Msa_AF_105718	zgc:162952	B3galnt1	B3GALNT1
UF_Msa_CF_118594	zgc:194551	B3galt5	B3GALT5
UF_Msa_AF_101740	b3gnt2a	B3gnt2	B3GNT2
UF_Msa_AF_105806	b3gnt2l	B3gnt8	B3GNT8
UF_Msa_AF_100412	b4galnt3b	B4galnt3	B4GALNT3
UF_Msa_AF_102660	b4gat1	B4gat1	B4GAT1
UF_Msa_AF_106372	b9d1	B9d1	B9D1
UF_Msa_AF_103963	b9d2	B9d2	B9D2
UF_Msa_AF_109243	bag2	Bag2	BAG2
UF_Msa_AF_104989	bag2	Bag2	BAG2
UF_Msa_CF_124438	bag6l	Bag6	BAG6
UF_Msa_AF_101061	baiap2l1b	Baiap2l1	BAIAP2L1
UF_Msa_AF_108978	baiap2l1b	Baiap2l1	BAIAP2L1
UF_Msa_AF_105401	banf1	Banf1	BANF1
UF_Msa_CF_120708	bard1	Bard1	BARD1
UF_Msa_CF_120121	bard1	Bard1	BARD1
UF_Msa_AF_107228	baxa	Bax	BAX
UF_Msa_AF_102798	baz1a	Baz1a	BAZ1A
UF_Msa_AF_109674	baz1b	Baz1b	BAZ1B
UF_Msa_AF_102338	baz1b	Baz1b	BAZ1B
UF_Msa_AF_106009	baz1b	Baz1b	BAZ1B
UF_Msa_AF_101618	baz2a	Baz2a	BAZ2A
UF_Msa_AF_108682	baz2a	Baz2a	BAZ2A
UF_Msa_AF_104547	bbox1	Bbox1	BBOX1
UF_Msa_AF_109351	bbs5	Bbs5	BBS5
UF_Msa_AF_108345	si:ch211-231f6.6	BC003965	C16orf91
UF_Msa_AF_107991	bcap31	Bcap31	BCAP31
UF_Msa_AF_109650	bcas2	Bcas2	BCAS2
UF_Msa_AF_100598	bckdha	Bckdha	BCKDHA
UF_Msa_AF_105116	bckdhb	Bckdhb	BCKDHB
UF_Msa_CF_127633	bcl11aa	Bcl11a	BCL11A
UF_Msa_AF_108930	bcl2l1	Bcl2l1	BCL2L1
UF_Msa_AF_103724	bcl9	Bcl9	BCL9
UF_Msa_AF_102666	si:ch73-366l1.5	Bcorl1	BCORL1
UF_Msa_AF_102391	bcs1l	Bcs1l	BCS1L
UF_Msa_AF_107309	bcs1l	Bcs1l	BCS1L
UF_Msa_AF_108100	bdh2	Bdh2	BDH2
UF_Msa_AF_108740	bdh2	Bdh2	BDH2
UF_Msa_AF_104061	bdh2	Bdh2	BDH2
UF_Msa_AF_105901	zgc:101858	Bdh2	BDH2
UF_Msa_AF_100063	bet1	Bet1	BET1
UF_Msa_AF_101336	bet1l	Bet1l	BET1L
UF_Msa_AF_108174	bhlhe40	Bhlhe40	BHLHE40
UF_Msa_CF_123428	BICD2	Bicd2	BICD2
UF_Msa_AF_106722	birc5b	Birc5	BIRC5
UF_Msa_AF_109349	birc5a	Birc5	BIRC5
UF_Msa_AF_104883	birc6	Birc6	BIRC6
UF_Msa_AF_104530	birc6	Birc6	BIRC6
UF_Msa_AF_106299	blmh	Blmh	BLMH
UF_Msa_CF_127724	blmh	Blmh	BLMH
UF_Msa_AF_107088	blmh	Blmh	BLMH
UF_Msa_AF_100984	bloc1s1	Bloc1s1	BLOC1S1
UF_Msa_AF_100121	bloc1s2	Bloc1s2	BLOC1S2
UF_Msa_AF_108119	bloc1s2	Bloc1s2	BLOC1S2
UF_Msa_AF_108103	bloc1s4	Bloc1s4	BLOC1S4
UF_Msa_AF_109625	bloc1s4	Bloc1s4	BLOC1S4
UF_Msa_AF_105623	bloc1s5	Bloc1s5	BLOC1S5
UF_Msa_AF_108079	blvrb	Blvrb	BLVRB
UF_Msa_AF_100715	bmp15	Bmp15	BMP15
UF_Msa_CF_121778	bmp16	Bmp4	BMP4
UF_Msa_CF_122549	bmp7a	Bmp7	BMP7
UF_Msa_AF_102430	bmp7b	Bmp7	BMP7
UF_Msa_AF_102174	bmp8a	Bmp8a	BMP8A
UF_Msa_CF_123962	bnip1b	Bnip1	BNIP1
UF_Msa_AD_200235	bnip1b	Bnip1	BNIP1
UF_Msa_AD_200126	bnip1b	Bnip1	BNIP1
UF_Msa_AF_102630	bnip3	Bnip3	BNIP3
UF_Msa_AF_106961	boc	Boc	BOC
UF_Msa_AF_104580	boc	Boc	BOC
UF_Msa_AF_109492	bod1	Bod1	BOD1
UF_Msa_AF_109359	bod1l1	Bod1l	BOD1L1
UF_Msa_AF_103034	bod1l1	Bod1l	BOD1L1
UF_Msa_AF_101650	bcl2l16	Bok	BOK
UF_Msa_CF_123372	bcl2l16	Bok	BOK
UF_Msa_AF_103090	bcl2l16	Bok	BOK
UF_Msa_AF_106187	bola1	Bola1	BOLA1
UF_Msa_AD_200090	bola3	Bola3	BOLA3
UF_Msa_AD_200177	bola3	Bola3	BOLA3
UF_Msa_AF_106714	bola3	Bola3	BOLA3
UF_Msa_AF_104171	bop1	Bop1	BOP1
UF_Msa_AF_103035	borcs7	Borcs7	BORCS7
UF_Msa_AF_110185	borcs8	Borcs8	BORCS8
UF_Msa_CF_119077	bpgm	Bpgm	BPGM
UF_Msa_AF_104628	bptf	Bptf	BPTF
UF_Msa_AF_103427	brd1a	Brd1	BRD1
UF_Msa_CF_125683	brd2a	Brd2	BRD2
UF_Msa_CF_121200	brd2a	Brd2	BRD2
UF_Msa_AF_104669	brd2a	Brd2	BRD2
UF_Msa_AF_104396	brd2b	Brd2	BRD2
UF_Msa_AF_100298	brd2a	Brd2	BRD2
UF_Msa_AF_103505	brd2a	Brd2	BRD2
UF_Msa_AF_102306	brd2a	Brd2	BRD2
UF_Msa_AF_110182	brd2a	Brd2	BRD2
UF_Msa_AF_104378	brd3b	Brd3	BRD3
UF_Msa_AF_101593	brd4	Brd4	BRD4
UF_Msa_AF_100995	brd7	Brd7	BRD7
UF_Msa_AF_107068	BRD8	Brd8	BRD8
UF_Msa_AF_104442	bri3	Bri3	BRI3
UF_Msa_AF_107279	bricd5	Bricd5	BRICD5
UF_Msa_CF_119890	brinp1	Brinp1	BRINP1
UF_Msa_AF_108200	bxdc2	Brix1	BRIX1
UF_Msa_CF_119177	brk1	Brk1	BRK1
UF_Msa_AF_101606	brms1lb	Brms1l	BRMS1L
UF_Msa_AF_103514	brpf3a	Brpf3	BRPF3
UF_Msa_AF_104583	si:dkey-16p21.7	Brsk1	BRSK1
UF_Msa_CF_122702	brwd1	Brwd1	BRWD1
UF_Msa_AF_102397	bsdc1	Bsdc1	BSDC1
UF_Msa_AF_102172	btbd10b	Btbd10	BTBD10
UF_Msa_AF_104613	btbd10b	Btbd10	BTBD10
UF_Msa_AF_100811	btbd2a	Btbd2	BTBD2
UF_Msa_AF_104516	btf3	Btf3	BTF3
UF_Msa_AF_101818	btf3l4	Btf3l4	BTF3L4
UF_Msa_AF_109021	btf3l4	Btf3l4	BTF3L4
UF_Msa_AF_102923	btg1	Btg1	BTG1
UF_Msa_AF_105441	btg1	Btg1	BTG1
UF_Msa_AF_107497	btg1	Btg1	BTG1
UF_Msa_AF_109514	btg1	Btg1	BTG1
UF_Msa_AF_108806	si:dkey-79d12.5	Btg3	BTG3
UF_Msa_CF_120266	btg4	Btg4	BTG4
UF_Msa_AF_106994	btg4	Btg4	BTG4
UF_Msa_AF_107394	bub1	Bub1	BUB1
UF_Msa_AF_107384	bub3	Bub3	BUB3
UF_Msa_AF_104872	bub3	Bub3	BUB3
UF_Msa_AF_107371	bud23	Bud23	BUD23
UF_Msa_AF_103232	bud31	Bud31	BUD31
UF_Msa_AF_103959	bysl	Bysl	BYSL
UF_Msa_AF_109977	bysl	Bysl	BYSL
UF_Msa_AF_105710	bzw1a	Bzw1	BZW1
UF_Msa_AF_103602	bzw1a	Bzw1	BZW1
UF_Msa_AF_103508	si:ch1073-287p18.1	C030006K11Rik	C8orf82
UF_Msa_CF_119441	si:dkey-126g1.9	C130074G19Rik	C1orf115
UF_Msa_AF_105693	c1d	C1d	C1D
UF_Msa_AF_101774	c1galt1a	C1galt1	C1GALT1
UF_Msa_AF_110040	c1galt1a	C1galt1	C1GALT1
UF_Msa_AF_105466	c1galt1c1	C1galt1c1	C1GALT1C1
UF_Msa_AF_106351	c1qbp	C1qbp	C1QBP
UF_Msa_AF_103762	c1qbp	C1qbp	C1QBP
UF_Msa_AF_105813	c1qtnf6b	C1qtnf6	C1QTNF6
UF_Msa_CF_126564	c2cd5	C2cd5	C2CD5
UF_Msa_AF_107217	c3a.4	C3	C3
UF_Msa_AF_104677	c3a.1	C3	C3
UF_Msa_AF_109157	c3a.6	C3	C3
UF_Msa_AF_105698	c8b	C8b	C8B
UF_Msa_AF_103936	c9	C9	C9
UF_Msa_AF_100155	C13H9orf72	C9orf72	C9orf72
UF_Msa_AF_105066	cab39	Cab39	CAB39
UF_Msa_AF_100424	cab39l	Cab39l	CAB39L
UF_Msa_AF_103797	cabin1	Cabin1	CABIN1
UF_Msa_AF_105533	cabin1	Cabin1	CABIN1
UF_Msa_AF_103543	cacna1da	Cacna1d	CACNA1D
UF_Msa_CF_125555	cacna1sb	Cacna1s	CACNA1S
UF_Msa_AF_108719	cacna2d1a	Cacna2d1	CACNA2D1
UF_Msa_AF_101451	cacnb4b	Cacnb4	CACNB4
UF_Msa_CF_120550	cacnb4b	Cacnb4	CACNB4
UF_Msa_AF_100096	cacybp	Cacybp	CACYBP
UF_Msa_AD_200353	cad	Cad	CAD
UF_Msa_AD_200205	cad	Cad	CAD
UF_Msa_AF_103373	cadm1a	Cadm1	CADM1
UF_Msa_AF_105017	cadm1a	Cadm1	CADM1
UF_Msa_CF_118673	cadm1b	Cadm1	CADM1
UF_Msa_AF_100812	cadm4	Cadm4	CADM4
UF_Msa_AF_106530	calcoco1a	Calcoco1	CALCOCO1
UF_Msa_AF_108445	cald1a	Cald1	CALD1
UF_Msa_CF_123926	calm1a	Calm2	CALM2
UF_Msa_AD_200127	calm1b	Calm2	CALM2
UF_Msa_AF_103187	calm1a	Calm2	CALM2
UF_Msa_AD_200113	calm1b	Calm2	CALM2
UF_Msa_AF_103305	calm1b	Calm2	CALM2
UF_Msa_AF_108324	calm2a	Calm2	CALM2
UF_Msa_AF_107655	calm1a	Calm2	CALM2
UF_Msa_AF_100887	calr	Calr	CALR
UF_Msa_AF_106030	calr3a	Calr	CALR
UF_Msa_AF_106165	calr3b	Calr	CALR
UF_Msa_CF_125693	calua	Calu	CALU
UF_Msa_AF_105816	calub	Calu	CALU
UF_Msa_AF_104104	calua	Calu	CALU
UF_Msa_AF_101671	camk1da	Camk1d	CAMK1D
UF_Msa_AF_104792	camk2a	Camk2a	CAMK2A
UF_Msa_AF_107201	camk2g2	Camk2g	CAMK2G
UF_Msa_AF_106238	camk2n1a	Camk2n2	CAMK2N2
UF_Msa_AF_108443	camsap1b	Camsap1	CAMSAP1
UF_Msa_AF_105220	camsap2a	Camsap2	CAMSAP2
UF_Msa_CF_127590	camta1a	Camta1	CAMTA1
UF_Msa_AF_102324	camta1a	Camta1	CAMTA1
UF_Msa_AF_109149	cant1a	Cant1	CANT1
UF_Msa_AF_103997	cant1a	Cant1	CANT1
UF_Msa_AF_103492	capgb	Capg	CAPG
UF_Msa_AF_107136	capn2l	Capn2	CAPN2
UF_Msa_AF_108540	si:dkey-19b23.12	Capn5	CAPN5
UF_Msa_AF_108761	capns1b	Capns1	CAPNS1
UF_Msa_AF_101450	caprin1b	Caprin1	CAPRIN1
UF_Msa_AF_106564	caprin1b	Caprin1	CAPRIN1
UF_Msa_CF_121937	caprin1a	Caprin1	CAPRIN1
UF_Msa_AF_106653	caprin1b	Caprin1	CAPRIN1
UF_Msa_AF_108802	caprin1b	Caprin1	CAPRIN1
UF_Msa_CF_118845	caprin1b	Caprin1	CAPRIN1
UF_Msa_CF_124371	capza1a	Capza1	CAPZA1
UF_Msa_AF_104028	capza1b	Capza1	CAPZA1
UF_Msa_AF_100358	capzb	Capzb	CAPZB
UF_Msa_AF_104769	ca4b	Car4	CA4
UF_Msa_AF_101767	ca7	Car7	CA7
UF_Msa_CF_120156	ca7	Car7	CA7
UF_Msa_AF_108722	ca7	Car7	CA7
UF_Msa_AF_100178	carhsp1	Carhsp1	CARHSP1
UF_Msa_AF_109950	cart2	Cartpt	CARTPT
UF_Msa_AF_103157	cart4	Cartpt	CARTPT
UF_Msa_AF_106455	casc3	Casc3	CASC3
UF_Msa_AF_103164	casp3a	Casp3	CASP3
UF_Msa_AF_109244	casp3a	Casp3	CASP3
UF_Msa_AF_109466	casp3b	Casp3	CASP3
UF_Msa_AF_110065	casp9	Casp9	CASP9
UF_Msa_AF_104510	cat	Cat	CAT
UF_Msa_CF_123256	cblb	Cblb	CBLB
UF_Msa_AF_101940	cbln12	Cbln1	CBLN1
UF_Msa_AF_101589	cbr1	Cbr1	CBR1
UF_Msa_AF_102712	cbx3a	Cbx3	CBX3
UF_Msa_AF_104597	cbx5	Cbx5	CBX5
UF_Msa_AF_109373	cbx8b	Cbx8	CBX8
UF_Msa_CF_121241	cbx8a	Cbx8	CBX8
UF_Msa_AF_109126	cby1	Cby1	CBY1
UF_Msa_AF_106494	ccdc102a	Ccdc102a	CCDC102A
UF_Msa_AF_107673	ccdc115	Ccdc115	CCDC115
UF_Msa_AF_101002	ccdc12	Ccdc12	CCDC12
UF_Msa_AF_110013	ccdc124	Ccdc124	CCDC124
UF_Msa_AF_104411	ccdc124	Ccdc124	CCDC124
UF_Msa_CF_125127	ccdc126	Ccdc126	CCDC126
UF_Msa_CF_125507	ccdc13	Ccdc13	CCDC13
UF_Msa_AF_104742	ccdc130	Ccdc130	YJU2B
UF_Msa_AF_110039	ccdc149b	Ccdc149	CCDC149
UF_Msa_AF_108037	ccdc149a	Ccdc149	CCDC149
UF_Msa_AF_100262	ccdc149a	Ccdc149	CCDC149
UF_Msa_CF_124096	si:ch73-242m19.1	Ccdc162	CCDC162P
UF_Msa_CF_123762	ccdc167	Ccdc167	CCDC167
UF_Msa_CF_119078	ccdc167	Ccdc167	CCDC167
UF_Msa_AF_103575	ccdc173	Ccdc173	CCDC173
UF_Msa_AF_103205	ccdc174	Ccdc174	CCDC174
UF_Msa_AF_107683	ccdc22	Ccdc22	CCDC22
UF_Msa_AF_108550	ccdc22	Ccdc22	CCDC22
UF_Msa_AF_100999	ccdc28b	Ccdc28b	CCDC28B
UF_Msa_AF_109198	ccdc32	Ccdc32	CCDC32
UF_Msa_AF_106291	ccdc32	Ccdc32	CCDC32
UF_Msa_AF_107453	ccdc43	Ccdc43	CCDC43
UF_Msa_CF_119206	ccdc43	Ccdc43	CCDC43
UF_Msa_AF_105386	ccdc43	Ccdc43	CCDC43
UF_Msa_AF_100011	ccdc47	Ccdc47	CCDC47
UF_Msa_AF_109196	ccdc47	Ccdc47	CCDC47
UF_Msa_AF_108655	ccdc58	Ccdc58	MIX23
UF_Msa_CF_117701	ccdc58	Ccdc58	MIX23
UF_Msa_AF_109226	ccdc6b	Ccdc6	CCDC6
UF_Msa_CF_121328	ccdc62	Ccdc62	CCDC62
UF_Msa_AF_104691	ccdc77	Ccdc77	CCDC77
UF_Msa_AF_103713	ccdc85ca	Ccdc85c	CCDC85C
UF_Msa_AF_109382	si:ch211-217k17.7	Ccdc86	CCDC86
UF_Msa_AF_106288	si:ch211-274p24.4	Ccdc92b	CCDC92B
UF_Msa_CF_124501	ccdc97	Ccdc97	CCDC97
UF_Msa_AF_108144	si:ch211-106h11.3	Ccn1	CCN1
UF_Msa_AF_106397	cntd2	Ccna1	CCNA1
UF_Msa_AF_103929	ccna2	Ccna2	CCNA2
UF_Msa_AF_103248	ccnb1	Ccnb1	CCNB1
UF_Msa_AF_105296	ccnb2	Ccnb2	CCNB2
UF_Msa_AF_109957	ccnb2	Ccnb2	CCNB2
UF_Msa_AF_101477	ccnb3	Ccnb3	CCNB3
UF_Msa_AF_102335	ccnd2a	Ccnd2	CCND2
UF_Msa_CF_119627	ccne2	Ccne2	CCNE2
UF_Msa_AF_110254	ccne2	Ccne2	CCNE2
UF_Msa_AD_200081	ccng1	Ccng1	CCNG1
UF_Msa_AD_200392	ccng1	Ccng1	CCNG1
UF_Msa_AF_103954	ccng1	Ccng1	CCNG1
UF_Msa_AD_200257	ccng1	Ccng1	CCNG1
UF_Msa_AD_200307	ccng1	Ccng1	CCNG1
UF_Msa_CF_124743	ccng2	Ccng2	CCNG2
UF_Msa_AF_109710	ccng2	Ccng2	CCNG2
UF_Msa_AF_100681	ccnh	Ccnh	CCNH
UF_Msa_AF_109370	ccnh	Ccnh	CCNH
UF_Msa_AF_106438	ccnh	Ccnh	CCNH
UF_Msa_AF_100524	ccni2	Ccni	CCNI
UF_Msa_AF_103604	ccnj	Ccnj	CCNJ
UF_Msa_AF_101492	ccnl1a	Ccnl1	CCNL1
UF_Msa_CF_124633	ccnt1	Ccnt1	CCNT1
UF_Msa_AF_108476	ccnt1	Ccnt1	CCNT1
UF_Msa_AF_100588	ccny	Ccny	CCNY
UF_Msa_AF_102936	ccnyl1	Ccnyl1	CCNYL1
UF_Msa_AF_107358	cct2	Cct2	CCT2
UF_Msa_AF_108935	cct4	Cct4	CCT4
UF_Msa_AF_102612	cct4	Cct4	CCT4
UF_Msa_AF_106011	cct5	Cct5	CCT5
UF_Msa_AF_110025	cct6a	Cct6a	CCT6A
UF_Msa_AF_100872	cct6a	Cct6a	CCT6A
UF_Msa_AF_109840	cct7	Cct7	CCT7
UF_Msa_AF_109207	cct7	Cct7	CCT7
UF_Msa_AF_108864	cct7	Cct7	CCT7
UF_Msa_AF_101234	cct8	Cct8	CCT8
UF_Msa_AF_102816	cct8	Cct8	CCT8
UF_Msa_AF_105909	cct8	Cct8	CCT8
UF_Msa_AF_109860	cct8	Cct8	CCT8
UF_Msa_AF_100954	cd2bp2	Cd2bp2	CD2BP2
UF_Msa_AF_107405	cd2bp2	Cd2bp2	CD2BP2
UF_Msa_AF_100885	cd59	Cd59b	CD59
UF_Msa_AF_100168	cd63	Cd63	CD63
UF_Msa_AF_101059	cd82b	Cd82	CD82
UF_Msa_CF_121183	cd82a	Cd82	CD82
UF_Msa_AF_106811	cd82a	Cd82	CD82
UF_Msa_AF_100844	cd82b	Cd82	CD82
UF_Msa_AF_103440	cd9a	Cd9	CD9
UF_Msa_AF_104477	cd99l2	Cd99l2	CD99L2
UF_Msa_AF_102228	cdan1	Cdan1	CDAN1
UF_Msa_AF_109525	cdan1	Cdan1	CDAN1
UF_Msa_AF_109853	cdc123	Cdc123	CDC123
UF_Msa_AF_109907	cdc123	Cdc123	CDC123
UF_Msa_CF_120741	cdc14aa	Cdc14a	CDC14A
UF_Msa_AF_103813	cdc14b	Cdc14b	CDC14B
UF_Msa_AF_106471	cdc20	Cdc20	CDC20
UF_Msa_AF_109301	cdc23	Cdc23	CDC23
UF_Msa_AF_108633	cdc25b	Cdc25a	CDC25A
UF_Msa_AF_103237	cdc25b	Cdc25a	CDC25A
UF_Msa_AF_107487	cdc27	Cdc27	CDC27
UF_Msa_AF_100161	cdc27	Cdc27	CDC27
UF_Msa_AF_109053	cdc37	Cdc37	CDC37
UF_Msa_AF_103036	cdc37	Cdc37	CDC37
UF_Msa_AF_103506	cdc40	Cdc40	CDC40
UF_Msa_AF_107549	cdc42	Cdc42	CDC42
UF_Msa_AD_200379	cdc42	Cdc42	CDC42
UF_Msa_AD_200058	cdc42	Cdc42	CDC42
UF_Msa_AF_106724	cdc42bpaa	Cdc42bpa	CDC42BPA
UF_Msa_AF_103096	cdc45	Cdc45	CDC45
UF_Msa_AF_109683	cdc5l	Cdc5l	CDC5L
UF_Msa_AF_108188	cdc73	Cdc73	CDC73
UF_Msa_AF_100209	si:ch211-69g19.2	Cdca3	CDCA3
UF_Msa_AF_106977	cdca7a	Cdca7	CDCA7
UF_Msa_CF_122921	cdca8	Cdca8	CDCA8
UF_Msa_AF_100815	cdca8	Cdca8	CDCA8
UF_Msa_AF_102179	c1s	Cdcp2	CDCP2
UF_Msa_CF_124412	cdh1	Cdh1	CDH1
UF_Msa_AF_104548	cdh1	Cdh1	CDH1
UF_Msa_AF_103327	CDH18	Cdh18	CDH18
UF_Msa_AF_104902	cdh2	Cdh2	CDH2
UF_Msa_AF_101401	cdh2	Cdh2	CDH2
UF_Msa_AF_101344	cdk1	Cdk1	CDK1
UF_Msa_AF_102983	cdk10	Cdk10	CDK10
UF_Msa_CF_124089	cdk11b	Cdk11b	CDK11B
UF_Msa_AF_110077	cdk13	Cdk13	CDK13
UF_Msa_AF_101198	cdk14	Cdk14	CDK14
UF_Msa_AF_107843	cdk2	Cdk2	CDK2
UF_Msa_AF_109356	cdk2ap2	Cdk2ap2	CDK2AP2
UF_Msa_AF_108322	cdk4	Cdk4	CDK4
UF_Msa_AF_109261	cdk5r1b	Cdk5r1	CDK5R1
UF_Msa_AF_106570	cdk5rap1	Cdk5rap1	CDK5RAP1
UF_Msa_AF_105683	cdk5rap1	Cdk5rap1	CDK5RAP1
UF_Msa_AF_108264	cdk5rap3	Cdk5rap3	CDK5RAP3
UF_Msa_AF_102757	cdk6	Cdk6	CDK6
UF_Msa_CF_121565	cdk6	Cdk6	CDK6
UF_Msa_AF_109793	cdk7	Cdk7	CDK7
UF_Msa_AF_100263	cdkn2aipnl	Cdkn2aipnl	CDKN2AIPNL
UF_Msa_AF_101544	cdkn2d	Cdkn2d	CDKN2D
UF_Msa_AF_103880	cdkn3	Cdkn3	CDKN3
UF_Msa_AF_102138	CDPF1	Cdpf1	CDPF1
UF_Msa_CF_122436	cds1	Cds1	CDS1
UF_Msa_AF_100919	cds2	Cds2	CDS2
UF_Msa_AF_109836	cdt1	Cdt1	CDT1
UF_Msa_CF_126860	cdt1	Cdt1	CDT1
UF_Msa_AF_109785	cdv3	Cdv3	CDV3
UF_Msa_AF_100175	cdv3	Cdv3	CDV3
UF_Msa_AF_102453	cdx1b	Cdx1	CDX1
UF_Msa_AF_107368	cebpb	Cebpb	CEBPB
UF_Msa_AF_107880	cebpd	Cebpd	CEBPD
UF_Msa_AF_105012	cecr2	Cecr2	CECR2
UF_Msa_AF_105025	cecr2	Cecr2	CECR2
UF_Msa_AF_100824	ela2	Cela2a	CELA2A
UF_Msa_AF_106868	celf2	Celf2	CELF2
UF_Msa_AF_108712	celf2	Celf2	CELF2
UF_Msa_AF_103178	celf3a	Celf3	CELF3
UF_Msa_AF_100791	celf5a	Celf5	CELF5
UF_Msa_AF_108804	cenpe	Cenpe	CENPE
UF_Msa_AF_105536	cenpl	Cenpl	CENPL
UF_Msa_CF_122408	cenpn	Cenpn	CENPN
UF_Msa_AF_104768	cenpn	Cenpn	CENPN
UF_Msa_AF_102116	cenps	Cenps	CENPS
UF_Msa_AF_103862	cenpw	Cenpw	CENPW
UF_Msa_AF_104641	cep135	Cep135	CEP135
UF_Msa_CF_117785	cep170b	Cep170b	CEP170B
UF_Msa_AF_108145	fopnl	Cep20
UF_Msa_AF_102921	fopnl	Cep20
UF_Msa_CF_118692	cep55l	Cep55	CEP55
UF_Msa_AF_101280	cep70	Cep70	CEP70
UF_Msa_CF_119412	cep83	Cep83	CEP83
UF_Msa_AF_100110	cep83	Cep83	CEP83
UF_Msa_AF_106437	cers5	Cers5	CERS5
UF_Msa_AF_109416	cert1a	Cert1
UF_Msa_AF_106739	cert1a	Cert1
UF_Msa_AF_100751	cetn2	Cetn2	CETN2
UF_Msa_AF_103126	cetn2	Cetn2	CETN2
UF_Msa_AF_103042	cetn3	Cetn3	CETN3
UF_Msa_AF_101895	cfap20	Cfap20	CFAP20
UF_Msa_AF_107095	cfap298	Cfap298	CFAP298
UF_Msa_CF_117851	cfap410	Cfap410	CFAP410
UF_Msa_AF_106698	maats1	Cfap91	CFAP91
UF_Msa_AF_100305	cfl1	Cfl1	CFL1
UF_Msa_CF_124982	cfl1	Cfl1	CFL1
UF_Msa_AF_101126	cfl1	Cfl1	CFL1
UF_Msa_AF_105993	cfl1	Cfl1	CFL1
UF_Msa_AF_107141	cfl2	Cfl2	CFL2
UF_Msa_AD_200173	CGA	Cga	CGA
UF_Msa_AD_200187	CGA	Cga	CGA
UF_Msa_AF_103991	cgnl1	Cgnl1	CGNL1
UF_Msa_CF_118479	chac1	Chac1	CHAC1
UF_Msa_AF_106866	chac1	Chac1	CHAC1
UF_Msa_CF_123508	chaf1a	Chaf1a	CHAF1A
UF_Msa_AF_109855	chaf1a	Chaf1a	CHAF1A
UF_Msa_AF_105197	chaf1a	Chaf1a	CHAF1A
UF_Msa_CF_125249	chaf1a	Chaf1a	CHAF1A
UF_Msa_AF_104957	chaf1b	Chaf1b	CHAF1B
UF_Msa_AF_108528	chchd10	Chchd10	CHCHD10
UF_Msa_AF_105367	chchd10	Chchd10	CHCHD10
UF_Msa_AF_106711	chchd2	Chchd2	CHCHD2
UF_Msa_AF_100967	chchd3b	Chchd3	CHCHD3
UF_Msa_AF_105261	chchd4a	Chchd4	CHCHD4
UF_Msa_AF_109946	chd2	Chd2	CHD2
UF_Msa_AF_103328	chd2	Chd2	CHD2
UF_Msa_CF_119288	chd4b	Chd4	CHD4
UF_Msa_AF_104964	chd4a	Chd4	CHD4
UF_Msa_CF_117714	chd4a	Chd4	CHD4
UF_Msa_AF_104752	chd5	Chd5	CHD5
UF_Msa_CF_121180	chd6	Chd6	CHD6
UF_Msa_AF_108658	chd7	Chd7	CHD7
UF_Msa_AF_105307	chd7	Chd7	CHD7
UF_Msa_AF_100462	chfr	Chfr	CHFR
UF_Msa_AF_108939	chia.6	Chia1	CHIA
UF_Msa_AF_102920	chia.3	Chia1	CHIA
UF_Msa_CF_126797	chic1	Chic1	CHIC1
UF_Msa_AF_107984	chic2	Chic2	CHIC2
UF_Msa_AF_100525	si:ch211-226m16.2	Chil3	CHIA
UF_Msa_AF_108605	chmp1b	Chmp1b	CHMP1B
UF_Msa_AF_105549	chmp2a	Chmp2a	CHMP2A
UF_Msa_AF_101274	chmp4c	Chmp4c	CHMP4C
UF_Msa_AF_106305	chmp5b	Chmp5	CHMP5
UF_Msa_AF_101790	chmp5a	Chmp5	CHMP5
UF_Msa_AF_101811	chmp5b	Chmp5	CHMP5
UF_Msa_AF_100440	chmp6b	Chmp6	CHMP6
UF_Msa_AF_104609	chmp7	Chmp7	CHMP7
UF_Msa_AF_106081	chordc1b	Chordc1	CHORDC1
UF_Msa_AF_110165	chp1	Chp1	CHP1
UF_Msa_AF_101326	chpf2	Chpf2	CHPF2
UF_Msa_AF_107466	chpf2	Chpf2	CHPF2
UF_Msa_AF_101603	chrac1	Chrac1	CHRAC1
UF_Msa_CF_126405	chrna4b	Chrna4	CHRNA4
UF_Msa_CF_126654	chrnb1l	Chrnb1	CHRNB1
UF_Msa_AF_108214	chst14	Chst14	CHST14
UF_Msa_AF_101071	chtf18	Chtf18	CHTF18
UF_Msa_CF_118031	chtf18	Chtf18	CHTF18
UF_Msa_AF_100282	chtf8	Chtf8	CHTF8
UF_Msa_AF_103737	chtopa	Chtop	CHTOP
UF_Msa_AF_100516	chuk	Chuk	CHUK
UF_Msa_AF_102877	churc1	Churc1	CHURC1
UF_Msa_AF_103245	churc1	Churc1	CHURC1
UF_Msa_AF_107750	ciao1	Ciao1	CIAO1
UF_Msa_AF_103566	ciao2b	Ciao2b	CIAO2B
UF_Msa_CF_122602	cib1	Cib1	CIB1
UF_Msa_AF_103225	cib1	Cib1	CIB1
UF_Msa_AF_107666	fam92a1	Cibar1
UF_Msa_AF_107319	cidea	Cidea	CIDEA
UF_Msa_AF_106435	cip2a	Cip2a	CIP2A
UF_Msa_AF_108853	cirbpb	Cirbp	CIRBP
UF_Msa_AF_100493	zgc:110843	Cisd1	CISD1
UF_Msa_AF_108827	zgc:110843	Cisd1	CISD1
UF_Msa_AF_100825	cited4b	Cited4	CITED4
UF_Msa_AF_108565	si:ch211-266i6.3	Ckap2	CKAP2
UF_Msa_AF_107833	ckap5	Ckap5	CKAP5
UF_Msa_AF_109557	ckbb	Ckb	CKB
UF_Msa_AF_101242	ckba	Ckb	CKB
UF_Msa_AF_102227	ckma	Ckm	CKM
UF_Msa_AF_109560	cks1b	Cks1b	CKS1B
UF_Msa_CF_120568	clasp2	Clasp2	CLASP2
UF_Msa_CF_121970	clasrp	Clasrp	CLASRP
UF_Msa_AF_105615	clcn1a	Clcn1	CLCN1
UF_Msa_AF_100225	clcn3	Clcn3	CLCN3
UF_Msa_CF_122861	clcn7	Clcn7	CLCN7
UF_Msa_AF_108858	cldn10l2	Cldn10	CLDN10
UF_Msa_AF_107120	cldn19	Cldn19	CLDN19
UF_Msa_AF_105347	cldnd	Cldn4	CLDN4
UF_Msa_AF_106898	cldnk	Cldn6	CLDN6
UF_Msa_AF_107123	cldn7b	Cldn7	CLDN7
UF_Msa_AF_108292	si:dkey-26c10.5	Clec2g	CLEC2D
UF_Msa_AF_109275	clic5b	Clic5	CLIC5
UF_Msa_AF_105978	clint1a	Clint1	CLINT1
UF_Msa_AF_100548	clip1a	Clip1	CLIP1
UF_Msa_AF_105104	clk4a	Clk4	CLK4
UF_Msa_AF_109880	clns1a	Clns1a	CLNS1A
UF_Msa_CF_125176	clns1a	Clns1a	CLNS1A
UF_Msa_AF_107272	clocka	Clock	CLOCK
UF_Msa_CF_125409	clp1	Clp1	CLP1
UF_Msa_CF_121215	CLPB	Clpb	CLPB
UF_Msa_AF_106655	clpp	Clpp	CLPP
UF_Msa_AF_103695	clptm1	Clptm1	CLPTM1
UF_Msa_CF_118552	clrn2	Clrn2	CLRN2
UF_Msa_AF_107059	clstn1	Clstn1	CLSTN1
UF_Msa_AF_104484	clta	Clta	CLTA
UF_Msa_AF_109980	clu	Clu	CLU
UF_Msa_CF_117820	clu	Clu	CLU
UF_Msa_AF_104289	clul1	Clu	CLU
UF_Msa_AF_106633	clu	Clu	CLU
UF_Msa_AF_110288	si:ch211-166a6.5	Cluh	CLUH
UF_Msa_AF_102581	cluha	Cluh	CLUH
UF_Msa_AF_109629	clybl	Clybl	CLYBL
UF_Msa_AF_110233	cmc1	Cmc1	CMC1
UF_Msa_AF_102255	fpr1	Cmklr1	CMKLR1
UF_Msa_CF_119349	fpr1	Cmklr1	CMKLR1
UF_Msa_AF_102730	cmss1	Cmss1	CMSS1
UF_Msa_AF_103463	cnbpb	Cnbp	CNBP
UF_Msa_AF_102016	cnbpb	Cnbp	CNBP
UF_Msa_AF_104981	cnbpb	Cnbp	CNBP
UF_Msa_CF_118936	cndp2	Cndp2	CNDP2
UF_Msa_AF_107884	cnep1r1	Cnep1r1	CNEP1R1
UF_Msa_AF_107808	cnih1	Cnih1	CNIH1
UF_Msa_AF_101913	cnksr3	Cnksr3	CNKSR3
UF_Msa_AF_100359	cnn1b	Cnn1	CNN1
UF_Msa_AF_101460	cnot1	Cnot1	CNOT1
UF_Msa_AF_106656	cnot10	Cnot10	CNOT10
UF_Msa_AF_104235	cnot10	Cnot10	CNOT10
UF_Msa_AF_101057	cnot11	Cnot11	CNOT11
UF_Msa_CF_126062	cnot11	Cnot11	CNOT11
UF_Msa_AF_100299	cnot2	Cnot2	CNOT2
UF_Msa_AF_107740	cnot3a	Cnot3	CNOT3
UF_Msa_AF_109227	cnot3b	Cnot3	CNOT3
UF_Msa_AF_105956	cnot4a	Cnot4	CNOT4
UF_Msa_CF_123192	cnot4b	Cnot4	CNOT4
UF_Msa_AF_104867	cnot4a	Cnot4	CNOT4
UF_Msa_AF_109678	cnot7	Cnot7	CNOT7
UF_Msa_AF_110009	cnot8	Cnot8	CNOT8
UF_Msa_AF_101663	cnot9	Cnot9	CNOT9
UF_Msa_CF_126162	cnp	Cnp	CNP
UF_Msa_AF_105564	cnpy2	Cnpy2	CNPY2
UF_Msa_AF_100746	cnpy1	Cnpy2	CNPY2
UF_Msa_AF_109738	cnpy3	Cnpy3	CNPY3
UF_Msa_AF_107055	cnpy4	Cnpy4	CNPY4
UF_Msa_AF_103030	cnpy4	Cnpy4	CNPY4
UF_Msa_CF_124014	cnsta	Cnst	CNST
UF_Msa_AF_109350	cntn5	Cntn5	CNTN5
UF_Msa_CF_119707	cntnap3	Cntnap4	CNTNAP4
UF_Msa_AF_101936	coa3a	Coa3	COA3
UF_Msa_AF_103081	coa5	Coa5	COA5
UF_Msa_AF_101121	coa8	Coa8
UF_Msa_AF_100212	coasy	Coasy	COASY
UF_Msa_AF_107392	coasy	Coasy	COASY
UF_Msa_AF_101258	cog1	Cog1	COG1
UF_Msa_AF_106161	cog1	Cog1	COG1
UF_Msa_AF_100804	cog4	Cog4	COG4
UF_Msa_AF_109184	cog5	Cog5	COG5
UF_Msa_CF_125454	col11a1a	Col11a1	COL11A1
UF_Msa_CF_122736	col14a1b	Col14a1	COL14A1
UF_Msa_AF_109328	col1a1a	Col1a1	COL1A1
UF_Msa_AF_109372	col1a2	Col1a2	COL1A2
UF_Msa_AF_107733	col4a2	Col4a2	COL4A2
UF_Msa_AF_107112	commd3	Commd3	COMMD3
UF_Msa_AF_104591	commd3	Commd3	COMMD3
UF_Msa_CF_119012	commd4	Commd4	COMMD4
UF_Msa_AF_109325	commd5	Commd5	COMMD5
UF_Msa_AF_102402	commd8	Commd8	COMMD8
UF_Msa_AF_108064	comtd1	Comtd1	COMTD1
UF_Msa_AF_100108	comtd1	Comtd1	COMTD1
UF_Msa_AF_102640	copa	Copa	COPA
UF_Msa_AF_108472	copb1	Copb1	COPB1
UF_Msa_AF_105896	copb1	Copb1	COPB1
UF_Msa_AF_109231	copb2	Copb2	COPB2
UF_Msa_CF_126681	copb2	Copb2	COPB2
UF_Msa_AF_105406	cope	Cope	COPE
UF_Msa_AF_107973	cope	Cope	COPE
UF_Msa_AF_104544	copg2	Copg2	COPG2
UF_Msa_AF_110286	cops2	Cops2	COPS2
UF_Msa_AF_104276	cops4	Cops4	COPS4
UF_Msa_AF_102989	cops5	Cops5	COPS5
UF_Msa_AF_105468	cops5	Cops5	COPS5
UF_Msa_AF_106861	cops7a	Cops7a	COPS7A
UF_Msa_AF_109954	copz1	Copz1	COPZ1
UF_Msa_AF_102916	copz1	Copz1	COPZ1
UF_Msa_AF_101924	coq10b	Coq10b	COQ10B
UF_Msa_AF_102159	coq2	Coq2	COQ2
UF_Msa_AF_103256	coq5	Coq5	COQ5
UF_Msa_AF_101141	coq6	Coq6	COQ6
UF_Msa_AF_100717	coq6	Coq6	COQ6
UF_Msa_AF_105633	coq6	Coq6	COQ6
UF_Msa_AF_103642	coq6	Coq6	COQ6
UF_Msa_AF_100623	coq8aa	Coq8a	COQ8A
UF_Msa_AF_103680	coq9	Coq9	COQ9
UF_Msa_AF_107565	cox11	Cox11	COX11
UF_Msa_AF_102828	cox4i1l	Cox4i1	COX4I1
UF_Msa_AF_101270	cox4i1	Cox4i1	COX4I1
UF_Msa_AF_103064	cox5aa	Cox5a	COX5A
UF_Msa_AF_105069	cox5aa	Cox5a	COX5A
UF_Msa_AF_101244	COX5B	Cox5b	COX5B
UF_Msa_AF_101171	cox6a1	Cox6a2	COX6A2
UF_Msa_AF_101396	cox6b2	Cox6b2	COX6B2
UF_Msa_AF_105505	COX7A2	Cox7a2	COX7A2
UF_Msa_AF_105147	cox7b	Cox7b	COX7B
UF_Msa_CF_124056	cp	Cp	CP
UF_Msa_AF_108792	cpe	Cpe	CPE
UF_Msa_AF_106555	cpeb1b	Cpeb1	CPEB1
UF_Msa_AF_102212	cplx4a	Cplx4	CPLX4
UF_Msa_AF_108437	cpn1	Cpn1	CPN1
UF_Msa_AF_105926	cpne5b	Cpne5	CPNE5
UF_Msa_CF_125796	cpne5a	Cpne5	CPNE5
UF_Msa_AF_108297	cpne8	Cpne8	CPNE8
UF_Msa_AD_200129	cps1	Cps1	CPS1
UF_Msa_AF_106932	cps1	Cps1	CPS1
UF_Msa_AD_200325	cps1	Cps1	CPS1
UF_Msa_CF_125243	cpsf1	Cpsf1	CPSF1
UF_Msa_AF_106725	cpsf3	Cpsf3	CPSF3
UF_Msa_CF_123607	cpt2	Cpt2	CPT2
UF_Msa_AF_101846	cptp	Cptp	CPTP
UF_Msa_AF_105905	cpvl	Cpvl	CPVL
UF_Msa_AF_104428	crabp1b	Crabp1	CRABP1
UF_Msa_CF_126463	cradd	Cradd	CRADD
UF_Msa_AF_108484	cratb	Crat	CRAT
UF_Msa_CF_120654	crata	Crat	CRAT
UF_Msa_CF_120225	cratb	Crat	CRAT
UF_Msa_AF_107494	CRAT	Crat	CRAT
UF_Msa_AF_101240	CRAT	Crat	CRAT
UF_Msa_AF_109711	crbn	Crbn	CRBN
UF_Msa_AF_100514	crbn	Crbn	CRBN
UF_Msa_AF_100962	crcp	Crcp	CRCP
UF_Msa_AF_105583	creb1a	Creb1	CREB1
UF_Msa_AF_103502	creg2	Creg2	CREG2
UF_Msa_AF_107475	creg2	Creg2	CREG2
UF_Msa_AF_109662	crhbp	Crhbp	CRHBP
UF_Msa_CF_124322	crhr1	Crhr1	CRHR1
UF_Msa_AF_102035	crip2	Crip2	CRIP2
UF_Msa_AF_100980	cript	Cript	CRIPT
UF_Msa_AF_101236	cript	Cript	CRIPT
UF_Msa_AF_108890	crkl	Crkl	CRKL
UF_Msa_AF_108961	crls1	Crls1	CRLS1
UF_Msa_CF_124604	crmp1	Crmp1	CRMP1
UF_Msa_AF_107002	crnkl1	Crnkl1	CRNKL1
UF_Msa_AF_101668	crp2	Crp	CRP
UF_Msa_AF_105515	crp2	Crp	CRP
UF_Msa_AF_109269	crtac1a	Crtac1	CRTAC1
UF_Msa_CF_122192	crtc1b	Crtc1	CRTC1
UF_Msa_AF_105522	cryba2a	Cryba2	CRYBA2
UF_Msa_AF_104076	cryz	Cryz	CRYZ
UF_Msa_AF_109742	cs	Cs	CS
UF_Msa_AF_109791	csad	Csad	CSAD
UF_Msa_CF_117711	si:dkeyp-121d4.3	Csde1	CSDE1
UF_Msa_CF_123646	csde1	Csde1	CSDE1
UF_Msa_AF_100223	csde1	Csde1	CSDE1
UF_Msa_AF_110062	cse1l	Cse1l	CSE1L
UF_Msa_AF_107637	csgalnact1a	Csgalnact1	CSGALNACT1
UF_Msa_AF_102672	csgalnact2	Csgalnact2	CSGALNACT2
UF_Msa_AF_107402	csnk1a1	Csnk1a1	CSNK1A1
UF_Msa_AF_102947	csnk1db	Csnk1d	CSNK1D
UF_Msa_AF_106944	csnk1g2a	Csnk1g2	CSNK1G2
UF_Msa_AF_101808	csnk2a1	Csnk2a1	CSNK2A1
UF_Msa_AF_100075	zgc:86598	Csnk2a1	CSNK2A1
UF_Msa_CF_126610	csnk2a1	Csnk2a1	CSNK2A1
UF_Msa_AF_102561	zgc:86598	Csnk2a1	CSNK2A1
UF_Msa_CF_119346	zgc:86598	Csnk2a1	CSNK2A1
UF_Msa_CF_125821	csnk2a2a	Csnk2a2	CSNK2A2
UF_Msa_AF_104151	csnk2b	Csnk2b	CSNK2B
UF_Msa_CF_119992	cspp1b	Cspp1	CSPP1
UF_Msa_AF_106053	csrnp1b	Csrnp1	CSRNP1
UF_Msa_AF_108725	cst14b.1	Cstb	CSTB
UF_Msa_AF_105965	cstf1	Cstf1	CSTF1
UF_Msa_AF_109628	cstf1	Cstf1	CSTF1
UF_Msa_AF_109422	cstf1	Cstf1	CSTF1
UF_Msa_AF_103611	ctbs	Ctbs	CTBS
UF_Msa_AF_105987	ctbs	Ctbs	CTBS
UF_Msa_CF_125400	ctdnep1a	Ctdnep1	CTDNEP1
UF_Msa_AF_103293	cth	Cth	CTH
UF_Msa_AF_103939	ctif	Ctif	CTIF
UF_Msa_AF_105873	ctnnb1	Ctnnb1	CTNNB1
UF_Msa_AF_105800	ctnnb1	Ctnnb1	CTNNB1
UF_Msa_AF_110256	ctps1b	Ctps	CTPS1
UF_Msa_AF_104636	ela2l	Ctrc	CTRC
UF_Msa_AF_106035	si:ch211-122f10.4	Ctsa	CTSA
UF_Msa_AF_106006	ctsba	Ctsb	CTSB
UF_Msa_AD_200098	ctsba	Ctsb	CTSB
UF_Msa_AF_107259	ctsba	Ctsb	CTSB
UF_Msa_AD_200050	ctsba	Ctsb	CTSB
UF_Msa_AF_107790	ctsd	Ctsd	CTSD
UF_Msa_AF_110049	ctsd	Ctsd	CTSD
UF_Msa_AF_100071	ctsla	Ctsl	CTSV
UF_Msa_AF_106348	zgc:110239	Ctsr	CTSL
UF_Msa_AF_104926	zgc:110239	Ctsr	CTSL
UF_Msa_AF_109161	ctsz	Ctsz	CTSZ
UF_Msa_AF_101612	cttn	Cttn	CTTN
UF_Msa_AF_101309	ctu1	Ctu1	CTU1
UF_Msa_CF_119357	ctu2	Ctu2	CTU2
UF_Msa_AF_108574	cul1b	Cul1	CUL1
UF_Msa_AF_103969	cul1a	Cul1	CUL1
UF_Msa_AF_100582	cul2	Cul2	CUL2
UF_Msa_AF_103764	cul2	Cul2	CUL2
UF_Msa_AF_101693	cul3b	Cul3	CUL3
UF_Msa_AF_104626	cul3b	Cul3	CUL3
UF_Msa_AF_109061	cul3a	Cul3	CUL3
UF_Msa_AF_109581	cutc	Cutc	CUTC
UF_Msa_AF_102886	cwc15	Cwc15	CWC15
UF_Msa_AF_104193	cwc15	Cwc15	CWC15
UF_Msa_AF_102843	cwc22	Cwc22	CWC22
UF_Msa_AF_108786	cwc22	Cwc22	CWC22
UF_Msa_CF_126487	cwc22	Cwc22	CWC22
UF_Msa_AF_109871	cwc25	Cwc25	CWC25
UF_Msa_AF_106147	cwc25	Cwc25	CWC25
UF_Msa_AF_109531	cwc25	Cwc25	CWC25
UF_Msa_CF_122012	cwc27	Cwc27	CWC27
UF_Msa_CF_118500	cwf19l2	Cwf19l2	CWF19L2
UF_Msa_CF_124892	cxxc1b	Cxxc1	CXXC1
UF_Msa_AF_107735	cxxc1b	Cxxc1	CXXC1
UF_Msa_AF_103370	cxxc4	Cxxc4	CXXC4
UF_Msa_AF_105854	cxxc5a	Cxxc5	CXXC5
UF_Msa_AF_105759	cyb561a3a	Cyb561a3	CYB561A3
UF_Msa_AF_108791	cyb5b	Cyb5b	CYB5B
UF_Msa_AF_100713	cyb5r3	Cyb5r3	CYB5R3
UF_Msa_AF_105175	cybc1	Cybc1	CYBC1
UF_Msa_CF_118308	cyc1	Cyc1	CYC1
UF_Msa_AF_101413	cyc1	Cyc1	CYC1
UF_Msa_AF_101788	cycsb	Cycs	CYCS
UF_Msa_CF_126456	cygb1	Cygb	CYGB
UF_Msa_AD_200348	cyp19a1b	Cyp19a1	CYP19A1
UF_Msa_AD_200268	cyp19a1b	Cyp19a1	CYP19A1
UF_Msa_AF_100314	cyp1a	Cyp1a1	CYP1A1
UF_Msa_AD_200006	cyp1a	Cyp1a1	CYP1A1
UF_Msa_AD_200156	cyp1a	Cyp1a1	CYP1A1
UF_Msa_AF_108185	cyp1b1	Cyp1b1	CYP1B1
UF_Msa_AF_105016	cyp24a1	Cyp24a1	CYP24A1
UF_Msa_AF_105329	cyp26a1	Cyp26a1	CYP26A1
UF_Msa_AF_101652	cyp2k16	Cyp2b19	CYP2B6
UF_Msa_AF_104339	cyp2k19	Cyp2g1	CYP2C8
UF_Msa_CF_122414	cyp2y3	Cyp2g1	CYP2C8
UF_Msa_AF_108844	cyp2ad2	Cyp2j11	CYP2J2
UF_Msa_AF_101060	cyp2ad2	Cyp2j11	CYP2J2
UF_Msa_AD_200147	cyp2p10	Cyp2j11	CYP2J2
UF_Msa_AD_200238	cyp2p10	Cyp2j11	CYP2J2
UF_Msa_AD_200372	cyp2n13	Cyp2j8	CYP2J2
UF_Msa_AF_104871	cyp2p9	Cyp2j8	CYP2J2
UF_Msa_AD_200240	cyp2n13	Cyp2j8	CYP2J2
UF_Msa_AF_109439	cyp2u1	Cyp2u1	CYP2U1
UF_Msa_AF_104283	cyp2u1	Cyp2u1	CYP2U1
UF_Msa_AD_200228	cyp3a65	Cyp3a25	CYP3A43
UF_Msa_AD_200234	cyp3a65	Cyp3a25	CYP3A43
UF_Msa_AD_200182	cyp3a65	Cyp3a25	CYP3A43
UF_Msa_AD_200236	cyp3a65	Cyp3a25	CYP3A43
UF_Msa_AF_107714	cyp51	Cyp51	CYP51A1
UF_Msa_AF_102744	cyp8b3	Cyp8b1	CYP8B1
UF_Msa_AF_109483	fam49a	Cyria
UF_Msa_AF_109028	fam49a	Cyria
UF_Msa_CF_123026	fam49a	Cyria
UF_Msa_AF_107792	zgc:165573	Cystm1	CYSTM1
UF_Msa_AF_106635	CYTH3	Cyth3	CYTH3
UF_Msa_AF_109479	czib	Czib	CZIB
UF_Msa_AF_106237	kiaa1549la	D430041D05Rik	KIAA1549L
UF_Msa_AF_101779	zgc:136864	D8Ertd738e	C19orf53
UF_Msa_AF_107610	si:ch211-258f14.2	D930020B18Rik	C12orf56
UF_Msa_AF_105029	dad1	Dad1	DAD1
UF_Msa_AF_102964	dap3	Dap3	DAP3
UF_Msa_AF_103687	dap3	Dap3	DAP3
UF_Msa_AF_100379	dapk1	Dapk1	DAPK1
UF_Msa_CF_122480	dazap1	Dazap1	DAZAP1
UF_Msa_AF_106873	dazap2	Dazap2	DAZAP2
UF_Msa_AF_107613	dazl	Dazl	DAZL
UF_Msa_AF_104917	dazl	Dazl	DAZL
UF_Msa_AF_108334	dbnlb	Dbnl	DBNL
UF_Msa_AF_105288	dcaf13	Dcaf13	DCAF13
UF_Msa_AF_109859	dcaf17	Dcaf17	DCAF17
UF_Msa_AF_109714	wdr21	Dcaf4	DCAF4
UF_Msa_AF_106791	dcaf7	Dcaf7	DCAF7
UF_Msa_AF_106737	dcaf7	Dcaf7	DCAF7
UF_Msa_AF_102339	dck	Dck	DCK
UF_Msa_AF_104389	dclre1a	Dclre1a	DCLRE1A
UF_Msa_AF_105802	dclre1a	Dclre1a	DCLRE1A
UF_Msa_CF_120822	dctn4	Dctn4	DCTN4
UF_Msa_AF_106593	dctn4	Dctn4	DCTN4
UF_Msa_AF_109187	dctn4	Dctn4	DCTN4
UF_Msa_AF_106934	dctn5	Dctn5	DCTN5
UF_Msa_AF_108340	dctpp1	Dctpp1	DCTPP1
UF_Msa_AF_102106	dcun1d1	Dcun1d1	DCUN1D1
UF_Msa_AF_104109	dcun1d1	Dcun1d1	DCUN1D1
UF_Msa_AF_105145	dcun1d5	Dcun1d5	DCUN1D5
UF_Msa_AF_108997	dcxr	Dcxr	DCXR
UF_Msa_AF_108778	dda1	Dda1	DDA1
UF_Msa_AF_104518	ddb1	Ddb1	DDB1
UF_Msa_AF_101464	ddb2	Ddb2	DDB2
UF_Msa_AF_107511	ddit3	Ddit3	DDIT3
UF_Msa_AF_109961	ddx1	Ddx1	DDX1
UF_Msa_AF_103690	si:dkey-156n14.5	Ddx17	DDX17
UF_Msa_AF_106010	ddx18	Ddx18	DDX18
UF_Msa_AF_109071	zgc:193690	Ddx19a	DDX19A
UF_Msa_AF_103285	ddx20	Ddx20	DDX20
UF_Msa_AF_108558	ddx24	Ddx24	DDX24
UF_Msa_CF_126899	ddx27	Ddx27	DDX27
UF_Msa_AF_107649	ddx27	Ddx27	DDX27
UF_Msa_CF_126686	ddx39ab	Ddx39a	DDX39A
UF_Msa_AF_100323	ddx39ab	Ddx39a	DDX39A
UF_Msa_AF_106854	ddx39aa	Ddx39a	DDX39A
UF_Msa_AF_104097	ddx3xa	Ddx3x	DDX3X
UF_Msa_AF_103155	ddx4	Ddx4	DDX4
UF_Msa_AF_107584	ddx4	Ddx4	DDX4
UF_Msa_CF_123509	ddx43	Ddx43	DDX43
UF_Msa_AF_106809	ddx49	Ddx49	DDX49
UF_Msa_AF_101050	ddx5	Ddx5	DDX5
UF_Msa_AF_109636	ddx52	Ddx52	DDX52
UF_Msa_AF_100252	ddx52	Ddx52	DDX52
UF_Msa_AF_107211	ddx54	Ddx54	DDX54
UF_Msa_CF_119114	ddx55	Ddx55	DDX55
UF_Msa_AF_104256	ddx56	Ddx56	DDX56
UF_Msa_AF_106224	decr1	Decr1	DECR1
UF_Msa_CF_122279	decr1	Decr1	DECR1
UF_Msa_AF_108166	decr2	Decr2	DECR2
UF_Msa_AF_101521	decr2	Decr2	DECR2
UF_Msa_AF_105086	decr2	Decr2	DECR2
UF_Msa_AF_106772	dedd	Dedd	DEDD
UF_Msa_AF_109137	degs1	Degs1	DEGS1
UF_Msa_CF_118245	dennd2c	Dennd2c	DENND2C
UF_Msa_AF_100540	dennd2db	Dennd2d	DENND2D
UF_Msa_CF_127228	dennd4a	Dennd4a	DENND4A
UF_Msa_AF_110100	dennd5a	Dennd5a	DENND5A
UF_Msa_AF_104150	dennd5a	Dennd5a	DENND5A
UF_Msa_AF_104185	dennd5b	Dennd5b	DENND5B
UF_Msa_AF_108593	denr	Denr	DENR
UF_Msa_AF_100390	denr	Denr	DENR
UF_Msa_AF_102721	dera	Dera	DERA
UF_Msa_AF_102001	derl1	Derl1	DERL1
UF_Msa_AF_102930	derl2	Derl2	DERL2
UF_Msa_CF_122307	derl2	Derl2	DERL2
UF_Msa_AF_101538	det1	Det1	DET1
UF_Msa_AF_109666	dexi	Dexi	DEXI
UF_Msa_AF_104656	dffb	Dffb	DFFB
UF_Msa_AF_107335	dgcr8	Dgcr8	DGCR8
UF_Msa_AF_110103	dgcr8	Dgcr8	DGCR8
UF_Msa_CF_118265	dgkzb	Dgkz	DGKZ
UF_Msa_AF_105137	zgc:110540	Dguok	DGUOK
UF_Msa_AF_101560	dhcr7	Dhcr7	DHCR7
UF_Msa_AF_107060	dhfr	Dhfr	DHFR
UF_Msa_AF_108544	dhh	Dhh	DHH
UF_Msa_AF_103301	dhrs11b	Dhrs11	DHRS11
UF_Msa_CF_118823	zgc:113054	Dhrs2	DHRS2
UF_Msa_CF_124335	zgc:113054	Dhrs2	DHRS2
UF_Msa_AF_102399	zgc:113054	Dhrs2	DHRS2
UF_Msa_AF_109258	dhrs3a	Dhrs3	DHRS3
UF_Msa_AF_101026	dhrs4	Dhrs4	DHRS4
UF_Msa_AF_100089	dhrs7b	Dhrs7b	DHRS7B
UF_Msa_AF_101488	dhx15	Dhx15	DHX15
UF_Msa_AF_108911	dhx32a	Dhx32	DHX32
UF_Msa_AF_104575	dhx32a	Dhx32	DHX32
UF_Msa_CF_119133	dhx34	Dhx34	DHX34
UF_Msa_AF_103201	dhx34	Dhx34	DHX34
UF_Msa_AF_108431	dhx38	Dhx38	DHX38
UF_Msa_AF_108101	diabloa	Diablo	DIABLO
UF_Msa_AF_109993	diaph2	Diaph2	DIAPH2
UF_Msa_AF_103325	diaph2	Diaph2	DIAPH2
UF_Msa_CF_123187	dicer1	Dicer1	DICER1
UF_Msa_CF_121815	dido1	Dido1	DIDO1
UF_Msa_AF_106594	dimt1l	Dimt1	DIMT1
UF_Msa_AF_108622	dimt1l	Dimt1	DIMT1
UF_Msa_AF_106446	dimt1l	Dimt1	DIMT1
UF_Msa_AF_110060	dip2a	Dip2a	DIP2A
UF_Msa_CF_125408	dipk2b	Dipk2b	DIPK2B
UF_Msa_AF_103878	diras1a	Diras1	DIRAS1
UF_Msa_AF_102772	disc1	Disc1	DISC1
UF_Msa_AF_104854	disp1	Disp1	DISP1
UF_Msa_AF_102850	dkc1	Dkc1	DKC1
UF_Msa_CF_124548	dkk3b	Dkk3	DKK3
UF_Msa_AF_107946	dldh	Dld	DLD
UF_Msa_AF_107910	dlg1l	Dlg1	DLG1
UF_Msa_CF_120540	dlg1l	Dlg1	DLG1
UF_Msa_CF_119911	dlg1l	Dlg1	DLG1
UF_Msa_AF_102801	dlg2	Dlg2	DLG2
UF_Msa_AF_104967	dlst	Dlst	DLST
UF_Msa_AF_104433	dlst	Dlst	DLST
UF_Msa_CF_125076	dmap1	Dmap1	DMAP1
UF_Msa_AF_107389	dmgdh	Dmgdh	DMGDH
UF_Msa_CF_122671	si:dkeyp-86b9.1	Dnah10	DNAH10
UF_Msa_AF_103704	dnah9l	Dnah11	DNAH11
UF_Msa_AF_109781	dnah5	Dnah5	DNAH5
UF_Msa_AF_108648	dnaja1	Dnaja1	DNAJA1
UF_Msa_AF_104615	dnaja2b	Dnaja2	DNAJA2
UF_Msa_CF_121728	dnaja2b	Dnaja2	DNAJA2
UF_Msa_AF_107190	dnaja3a	Dnaja3	DNAJA3
UF_Msa_AF_102360	dnajb12a	Dnajb12	DNAJB12
UF_Msa_AF_109171	dnajb12a	Dnajb12	DNAJB12
UF_Msa_AF_102140	dnajb4	Dnajb4	DNAJB4
UF_Msa_AF_104520	dnajb4	Dnajb4	DNAJB4
UF_Msa_CF_121823	dnajb6a	Dnajb6	DNAJB6
UF_Msa_AF_105665	dnajb6a	Dnajb6	DNAJB6
UF_Msa_AF_104134	dnajc11a	Dnajc11	DNAJC11
UF_Msa_AF_100511	dnajc12	Dnajc12	DNAJC12
UF_Msa_CF_127463	dnajc14	Dnajc14	DNAJC14
UF_Msa_AF_107915	dnajc15	Dnajc15	DNAJC15
UF_Msa_AF_101826	dnajc17	Dnajc17	DNAJC17
UF_Msa_AF_102800	dnajc18	Dnajc18	DNAJC18
UF_Msa_AF_107557	dnajc18	Dnajc18	DNAJC18
UF_Msa_CF_126263	dnajc2	Dnajc2	DNAJC2
UF_Msa_AF_101728	dnajc2	Dnajc2	DNAJC2
UF_Msa_AF_108230	dnajc28	Dnajc28	DNAJC28
UF_Msa_CF_123467	dnajc3a	Dnajc3	DNAJC3
UF_Msa_AF_102120	dnajc30b	Dnajc30	DNAJC30
UF_Msa_AF_104740	dnajc5ab	Dnajc5	DNAJC5
UF_Msa_AF_108364	dnajc5gb	Dnajc5g	DNAJC5G
UF_Msa_AF_106605	dnajc7	Dnajc7	DNAJC7
UF_Msa_AF_102406	dnajc7	Dnajc7	DNAJC7
UF_Msa_AF_108734	dnajc8	Dnajc8	DNAJC8
UF_Msa_AF_100595	dnajc8	Dnajc8	DNAJC8
UF_Msa_AF_107540	dnajc9	Dnajc9	DNAJC9
UF_Msa_AF_107042	dnal1	Dnal1	DNAL1
UF_Msa_AF_100970	dnal4a	Dnal4	DNAL4
UF_Msa_CF_125601	dnase1l1	Dnase1l3	DNASE1L3
UF_Msa_AF_110116	dnd1	Dnd1	DND1
UF_Msa_AF_102410	dnlz	Dnlz	DNLZ
UF_Msa_AF_108785	si:dkey-32e23.4	Dnm1l	DNM1L
UF_Msa_AF_101305	dnmt1	Dnmt1	DNMT1
UF_Msa_AF_107975	dnmt1	Dnmt1	DNMT1
UF_Msa_AF_106787	dnmt1	Dnmt1	DNMT1
UF_Msa_CF_118817	dnmt1	Dnmt1	DNMT1
UF_Msa_AF_108083	dnmt3ab	Dnmt3a	DNMT3A
UF_Msa_AF_108870	dnmt3ab	Dnmt3a	DNMT3A
UF_Msa_AF_108122	dnttip2	Dnttip2	DNTTIP2
UF_Msa_AF_103049	dock1	Dock1	DOCK1
UF_Msa_AF_105219	dock4b	Dock4	DOCK4
UF_Msa_AF_102524	dop1a	Dop1a	DOP1A
UF_Msa_AF_101010	dpcd	Dpcd	DPCD
UF_Msa_AF_109031	dpf1	Dpf1	DPF1
UF_Msa_CF_119793	dpf2l	Dpf2	DPF2
UF_Msa_AF_100529	dph2	Dph2	DPH2
UF_Msa_AF_102970	dph7	Dph7	DPH7
UF_Msa_AF_101562	dpm3	Dpm3	DPM3
UF_Msa_AF_102590	dpp6a	Dpp6	DPP6
UF_Msa_CF_123905	dpp6a	Dpp6	DPP6
UF_Msa_AF_101456	dpp9	Dpp9	DPP9
UF_Msa_AF_108020	dpy30	Dpy30	DPY30
UF_Msa_AF_108679	dpydb	Dpyd	DPYD
UF_Msa_CF_123999	dpydb	Dpyd	DPYD
UF_Msa_AF_110214	dpys	Dpys	DPYS
UF_Msa_AF_108395	dpys	Dpys	DPYS
UF_Msa_AF_104621	drg1	Drg1	DRG1
UF_Msa_AF_108251	drg2	Drg2	DRG2
UF_Msa_AF_102558	dscamb	Dscam	DSCAM
UF_Msa_AF_104011	dscamb	Dscam	DSCAM
UF_Msa_AF_102060	dscc1	Dscc1	DSCC1
UF_Msa_AF_108040	dscc1	Dscc1	DSCC1
UF_Msa_AF_104238	DST	Dst	DST
UF_Msa_AF_102832	dtnbp1a	Dtnbp1	DTNBP1
UF_Msa_AF_103638	dtwd2	Dtwd2	DTWD2
UF_Msa_CF_124339	dtwd2	Dtwd2	DTWD2
UF_Msa_AF_109426	dtx2	Dtx2	DTX2
UF_Msa_CF_120717	si:dkey-40c23.2	Dtx3l	DTX3L
UF_Msa_AF_105003	dtymk	Dtymk	DTYMK
UF_Msa_AF_103885	dus4l	Dus4l	DUS4L
UF_Msa_AF_107352	dus4l	Dus4l	DUS4L
UF_Msa_AF_102949	dusp1	Dusp1	DUSP1
UF_Msa_AF_110280	dusp2	Dusp2	DUSP2
UF_Msa_AF_105458	dusp22b	Dusp22	DUSP22
UF_Msa_AF_101598	dusp23b	Dusp23	DUSP23
UF_Msa_AF_108107	dusp3a	Dusp3	DUSP3
UF_Msa_AF_107801	dusp4	Dusp4	DUSP4
UF_Msa_AF_102870	dusp5	Dusp5	DUSP5
UF_Msa_AF_109721	dut	Dut	DUT
UF_Msa_CF_124742	dync1i2b	Dync1i2	DYNC1I2
UF_Msa_AF_104265	dynll2a	Dynll2	DYNLL2
UF_Msa_AF_103728	dynll2a	Dynll2	DYNLL2
UF_Msa_CF_117988	dynlt1	Dynlt1c	DYNLT1
UF_Msa_AF_100729	dynlt3	Dynlt3	DYNLT3
UF_Msa_AF_104819	dynlt3	Dynlt3	DYNLT3
UF_Msa_AF_100998	dyrk1ab	Dyrk1a	DYRK1A
UF_Msa_AF_101524	e2f1	E2f1	E2F1
UF_Msa_AF_108899	e2f4	E2f4	E2F4
UF_Msa_AF_105734	ebag9	Ebag9	EBAG9
UF_Msa_AF_104865	ebag9	Ebag9	EBAG9
UF_Msa_CF_125084	ebna1bp2	Ebna1bp2	EBNA1BP2
UF_Msa_AF_106675	ebna1bp2	Ebna1bp2	EBNA1BP2
UF_Msa_CF_127426	ebna1bp2	Ebna1bp2	EBNA1BP2
UF_Msa_AF_102233	ebp	Ebp	EBP
UF_Msa_AF_104499	ebp	Ebp	EBP
UF_Msa_AF_100384	ece1	Ece1	ECE1
UF_Msa_CF_122221	ech1	Ech1	ECH1
UF_Msa_AF_107295	echs1	Echs1	ECHS1
UF_Msa_AF_103758	ect2	Ect2	ECT2
UF_Msa_AF_109590	edc3	Edc3	EDC3
UF_Msa_AF_105258	edc4	Edc4	EDC4
UF_Msa_AF_106776	edf1	Edf1	EDF1
UF_Msa_AF_106693	edrf1	Edrf1	EDRF1
UF_Msa_AF_104785	eed	Eed	EED
UF_Msa_AF_107012	eef1a1l1	Eef1a1	EEF1A1
UF_Msa_AF_107066	eef1a1l1	Eef1a1	EEF1A1
UF_Msa_AF_104226	si:dkey-37o8.1	Eef1a1	EEF1A1
UF_Msa_AF_104419	eef1a1l1	Eef1a1	EEF1A1
UF_Msa_AF_107954	eef1a1a	Eef1a1	EEF1A1
UF_Msa_AF_109648	eef1a1l1	Eef1a1	EEF1A1
UF_Msa_CF_123455	eef1a2	Eef1a2	EEF1A2
UF_Msa_AF_102762	eef1akmt1	Eef1akmt1	EEF1AKMT1
UF_Msa_AF_103127	eef1akmt2	Eef1akmt2	EEF1AKMT2
UF_Msa_CF_124603	CSKMT	Eef1aknmt	METTL13
UF_Msa_AF_108234	eef1db	Eef1d	EEF1D
UF_Msa_AF_104242	eef1db	Eef1d	EEF1D
UF_Msa_AF_108687	eef1db	Eef1d	EEF1D
UF_Msa_AF_102443	eef1db	Eef1d	EEF1D
UF_Msa_AF_102783	eef1da	Eef1d	EEF1D
UF_Msa_AF_105486	eef1e1	Eef1e1	EEF1E1
UF_Msa_AF_109547	eef1g	Eef1g	EEF1G
UF_Msa_AF_106442	eef1g	Eef1g	EEF1G
UF_Msa_AF_103149	eef2b	Eef2	EEF2
UF_Msa_AF_105153	eef2b	Eef2	EEF2
UF_Msa_AF_103322	eef2k	Eef2k	EEF2K
UF_Msa_AF_106940	eef2kmt	Eef2kmt	EEF2KMT
UF_Msa_AD_200108	efcab11	Efcab11	EFCAB11
UF_Msa_AD_200146	efcab11	Efcab11	EFCAB11
UF_Msa_CF_120011	efcab7	Efcab7	EFCAB7
UF_Msa_AF_105128	efemp2b	Efemp2	EFEMP2
UF_Msa_CF_123424	efhc1	Efhc1	EFHC1
UF_Msa_AF_100759	efna3a	Efna3	EFNA3
UF_Msa_CF_124905	efr3a	Efr3a	EFR3A
UF_Msa_CF_122910	efr3bb	Efr3b	EFR3B
UF_Msa_CF_118621	eftud2	Eftud2	EFTUD2
UF_Msa_CF_118107	eftud2	Eftud2	EFTUD2
UF_Msa_AF_101352	egln2	Egln2	EGLN2
UF_Msa_AF_105798	ehd3	Ehd3	EHD3
UF_Msa_AF_103794	ehd3	Ehd3	EHD3
UF_Msa_CF_118947	si:ch211-11k18.4	Ehd4	EHD4
UF_Msa_CF_125801	si:ch211-11k18.4	Ehd4	EHD4
UF_Msa_AF_106323	eif1	Eif1	EIF1
UF_Msa_AF_104946	eif1	Eif1	EIF1
UF_Msa_AF_109712	eif1ad	Eif1ad	EIF1AD
UF_Msa_AF_102765	eif1axb	Eif1ax	EIF1AX
UF_Msa_AF_107493	pkz	Eif2ak2	EIF2AK2
UF_Msa_AF_106293	eif2b1	Eif2b1	EIF2B1
UF_Msa_AF_109700	eif2b2	Eif2b2	EIF2B2
UF_Msa_AF_104178	eif2b3	Eif2b3	EIF2B3
UF_Msa_CF_126186	eif2b4	Eif2b4	EIF2B4
UF_Msa_AF_107076	eif2b4	Eif2b4	EIF2B4
UF_Msa_CF_120794	eif2b5	Eif2b5	EIF2B5
UF_Msa_AF_101222	eif2d	Eif2d	EIF2D
UF_Msa_AF_106139	eif2d	Eif2d	EIF2D
UF_Msa_AF_100522	eif2s1b	Eif2s1	EIF2S1
UF_Msa_AF_103985	eif2s1a	Eif2s1	EIF2S1
UF_Msa_AF_106089	eif2s2	Eif2s2	EIF2S2
UF_Msa_AF_106021	eif2s3	Eif2s3x	EIF2S3
UF_Msa_CF_120731	eif3ba	Eif3b	EIF3B
UF_Msa_AF_109691	eif3c	Eif3c	EIF3C
UF_Msa_AF_104144	eif3c	Eif3c	EIF3C
UF_Msa_AF_108981	eif3d	Eif3d	EIF3D
UF_Msa_AD_200064	eif3d	Eif3d	EIF3D
UF_Msa_AF_106865	eif3d	Eif3d	EIF3D
UF_Msa_AD_200164	eif3d	Eif3d	EIF3D
UF_Msa_AF_107506	eif3d	Eif3d	EIF3D
UF_Msa_AF_108995	eif3ea	Eif3e	EIF3E
UF_Msa_AF_107999	eif3f	Eif3f	EIF3F
UF_Msa_AF_106402	eif3f	Eif3f	EIF3F
UF_Msa_AF_105498	eif3f	Eif3f	EIF3F
UF_Msa_AF_107952	eif3g	Eif3g	EIF3G
UF_Msa_AF_100466	eif3g	Eif3g	EIF3G
UF_Msa_AF_101341	eif3i	Eif3i	EIF3I
UF_Msa_AF_104229	eif3i	Eif3i	EIF3I
UF_Msa_AF_102889	eif3i	Eif3i	EIF3I
UF_Msa_AF_107744	eif3ja	Eif3j2	EIF3J
UF_Msa_CF_125539	eif3ja	Eif3j2	EIF3J
UF_Msa_AF_100663	eif3k	Eif3k	EIF3K
UF_Msa_AF_108659	eif3s6ip	Eif3l	EIF3L
UF_Msa_AF_103517	eif3s6ip	Eif3l	EIF3L
UF_Msa_AF_104000	eif4a1a	Eif4a1	EIF4A1
UF_Msa_AF_108293	eif4a1b	Eif4a1	EIF4A1
UF_Msa_AF_110158	eif4a1a	Eif4a1	EIF4A1
UF_Msa_AF_100752	eif4a2	Eif4a2	EIF4A2
UF_Msa_AF_100406	eif4a3	Eif4a3	EIF4A3
UF_Msa_CF_121664	eif4ba	Eif4b	EIF4B
UF_Msa_AF_100641	eif4bb	Eif4b	EIF4B
UF_Msa_CF_121420	eif4bb	Eif4b	EIF4B
UF_Msa_AF_108952	eif4e1c	Eif4e	EIF4E
UF_Msa_AF_103275	eif4ea	Eif4e	EIF4E
UF_Msa_AF_104874	eif4ea	Eif4e	EIF4E
UF_Msa_AF_101861	eif4e2rs1	Eif4e2	EIF4E2
UF_Msa_AF_104790	eif4e2	Eif4e2	EIF4E2
UF_Msa_AF_105722	eif4e2rs1	Eif4e2	EIF4E2
UF_Msa_AF_107590	eif4e3	Eif4e3	EIF4E3
UF_Msa_AF_105230	eif4e3	Eif4e3	EIF4E3
UF_Msa_AF_106408	eif4ebp3l	Eif4ebp3	EIF4EBP3
UF_Msa_AF_108235	eif4enif1	Eif4enif1	EIF4ENIF1
UF_Msa_CF_124340	eif4enif1	Eif4enif1	EIF4ENIF1
UF_Msa_AF_101178	eif4enif1	Eif4enif1	EIF4ENIF1
UF_Msa_AF_100019	eif4enif1	Eif4enif1	EIF4ENIF1
UF_Msa_AF_108392	eif4enif1	Eif4enif1	EIF4ENIF1
UF_Msa_AF_103993	eif4enif1	Eif4enif1	EIF4ENIF1
UF_Msa_AF_110151	eif4g1a	Eif4g1	EIF4G1
UF_Msa_AF_108904	eif4g2a	Eif4g2	EIF4G2
UF_Msa_AF_103718	eif4g2b	Eif4g2	EIF4G2
UF_Msa_CF_120272	eif4g3a	Eif4g3	EIF4G3
UF_Msa_CF_124559	eif4h	Eif4h	EIF4H
UF_Msa_AF_106197	eif5	Eif5	EIF5
UF_Msa_AF_102070	eif5a	Eif5a	EIF5A
UF_Msa_CF_120374	eif5b	Eif5b	EIF5B
UF_Msa_AF_103509	eipr1	Eipr1	EIPR1
UF_Msa_AF_105243	elac1	Elac1	ELAC1
UF_Msa_AF_105726	elac2	Elac2	ELAC2
UF_Msa_AF_108433	elavl1b	Elavl1	ELAVL1
UF_Msa_CF_122969	elavl3	Elavl3	ELAVL3
UF_Msa_AF_106911	elavl3	Elavl3	ELAVL3
UF_Msa_AF_102606	ell	Ell	ELL
UF_Msa_CF_127141	ell	Ell	ELL
UF_Msa_AF_105180	elmo1	Elmo1	ELMO1
UF_Msa_CF_122830	eloal	Eloa	ELOA
UF_Msa_AF_108182	eloal	Eloa	ELOA
UF_Msa_AF_101486	elob	Elob	ELOB
UF_Msa_AF_106297	eloca	Eloc	ELOC
UF_Msa_AF_104179	elof1	Elof1	ELOF1
UF_Msa_AF_103934	elovl6l	Elovl3	ELOVL3
UF_Msa_CF_121878	elovl7b	Elovl7	ELOVL7
UF_Msa_CF_118774	elp2	Elp2	ELP2
UF_Msa_AF_104891	elp2	Elp2	ELP2
UF_Msa_AF_110194	elp3	Elp3	ELP3
UF_Msa_AF_101065	elp4	Elp4	ELP4
UF_Msa_AF_107363	elp4	Elp4	ELP4
UF_Msa_CF_121355	elp5	Elp5	ELP5
UF_Msa_AF_101621	emc10	Emc10	EMC10
UF_Msa_AF_105302	emc2	Emc2	EMC2
UF_Msa_AF_107861	zgc:86609	Emc3	EMC3
UF_Msa_AF_105935	zgc:86609	Emc3	EMC3
UF_Msa_AF_102458	emc6	Emc6	EMC6
UF_Msa_AF_102568	emc8	Emc8	EMC8
UF_Msa_AF_105384	emc9	Emc9	EMC9
UF_Msa_AF_108125	emg1	Emg1	EMG1
UF_Msa_AD_200323	eml2	Eml2	EML2
UF_Msa_AD_200143	eml2	Eml2	EML2
UF_Msa_AF_100246	eml2	Eml2	EML2
UF_Msa_AF_110224	EML4	Eml4	EML4
UF_Msa_CF_124185	emx3	Emx1	EMX1
UF_Msa_CF_121994	en1b	En1	EN1
UF_Msa_AF_106087	enc3	Enc1	ENC1
UF_Msa_CF_126355	si:dkey-222f8.3	Endou	ENDOU
UF_Msa_AF_102525	endouc	Endou	ENDOU
UF_Msa_AF_100986	eno1a	Eno1	ENO1
UF_Msa_AF_104778	eno1a	Eno1	ENO1
UF_Msa_AF_107771	eno1a	Eno1	ENO1
UF_Msa_AF_106354	eno1b	Eno1	ENO1
UF_Msa_AF_108196	eno1a	Eno1	ENO1
UF_Msa_AF_108215	eno2	Eno2	ENO2
UF_Msa_AF_104524	enoph1	Enoph1	ENOPH1
UF_Msa_AF_105293	enpp5	Enpp5	ENPP5
UF_Msa_AF_103192	entpd5b	Entpd5	ENTPD5
UF_Msa_CF_122487	entr1	Entr1	ENTR1
UF_Msa_AF_108896	eny2	Eny2	ENY2
UF_Msa_AF_104022	eomesa	Eomes	EOMES
UF_Msa_AF_103300	epb41a	Epb41	EPB41
UF_Msa_CF_127814	epb41l4a	Epb41l4a	EPB41L4A
UF_Msa_AF_105576	epc1a	Epc1	EPC1
UF_Msa_AF_107969	epc1b	Epc1	EPC1
UF_Msa_AF_101263	epcam	Epcam	EPCAM
UF_Msa_AF_105667	epha2a	Epha2	EPHA2
UF_Msa_AF_107619	epha7	Epha7	EPHA7
UF_Msa_AF_104599	ephb1	Ephb1	EPHB1
UF_Msa_AF_106047	ephx1	Ephx1	EPHX1
UF_Msa_AF_105403	ephx1	Ephx1	EPHX1
UF_Msa_CF_118749	ephx2	Ephx2	EPHX2
UF_Msa_CF_126341	epn1	Epn1	EPN1
UF_Msa_CF_124667	eppk1	Eppk1	EPPK1
UF_Msa_AF_106283	eral1	Eral1	ERAL1
UF_Msa_AF_101573	erbin	Erbin	ERBIN
UF_Msa_CF_124137	ercc1	Ercc1	ERCC1
UF_Msa_AF_101689	ercc1	Ercc1	ERCC1
UF_Msa_AF_100884	ercc8	Ercc8	ERCC8
UF_Msa_AF_102576	ERG28	Erg28	ERG28
UF_Msa_AF_110094	erh	Erh	ERH
UF_Msa_AF_101906	erh	Erh	ERH
UF_Msa_AF_109949	ern1	Ern1	ERN1
UF_Msa_AF_110002	ero1a	Ero1a	ERO1A
UF_Msa_AF_103555	esd	Esd	ESD
UF_Msa_AF_103487	espl1	Espl1	ESPL1
UF_Msa_CF_122078	espn	Espn	ESPN
UF_Msa_CF_122456	espn	Espn	ESPN
UF_Msa_CF_126927	espn	Espn	ESPN
UF_Msa_AF_104788	esr1	Esr1	ESR1
UF_Msa_AD_200201	esr1	Esr1	ESR1
UF_Msa_AD_200273	esr1	Esr1	ESR1
UF_Msa_AF_104994	esr2b	Esr2	ESR2
UF_Msa_AD_200271	esr2a	Esr2	ESR2
UF_Msa_AF_104002	esr2a	Esr2	ESR2
UF_Msa_AD_200244	esr2b	Esr2	ESR2
UF_Msa_AD_200272	esr2b	Esr2	ESR2
UF_Msa_AD_200055	esr2a	Esr2	ESR2
UF_Msa_AF_101155	etf1a	Etf1	ETF1
UF_Msa_AF_100352	etfa	Etfa	ETFA
UF_Msa_AF_105177	etfb	Etfb	ETFB
UF_Msa_AF_109392	ethe1	Ethe1	ETHE1
UF_Msa_AF_102556	etnk1	Etnk1	ETNK1
UF_Msa_AF_101929	etnk1	Etnk1	ETNK1
UF_Msa_CF_126951	etnk2	Etnk2	ETNK2
UF_Msa_CF_119722	eva1c	Eva1c	EVA1C
UF_Msa_AF_109418	eva1c	Eva1c	EVA1C
UF_Msa_CF_123441	evlb	Evl	EVL
UF_Msa_AF_101692	exd1	Exd1	EXD1
UF_Msa_CF_118889	exo1	Exo1	EXO1
UF_Msa_AF_108829	exoc1	Exoc1	EXOC1
UF_Msa_AF_105472	exoc3	Exoc3	EXOC3
UF_Msa_AF_104220	exoc8	Exoc8	EXOC8
UF_Msa_AF_102209	exosc10	Exosc10	EXOSC10
UF_Msa_AF_100484	exosc2	Exosc2	EXOSC2
UF_Msa_AF_107026	exosc3	Exosc3	EXOSC3
UF_Msa_AF_100572	exosc4	Exosc4	EXOSC4
UF_Msa_AF_107438	exosc5	Exosc5	EXOSC5
UF_Msa_AF_103170	exosc5	Exosc5	EXOSC5
UF_Msa_AF_107669	exosc7	Exosc7	EXOSC7
UF_Msa_AF_102158	exosc8	Exosc8	EXOSC8
UF_Msa_CF_119747	exosc9	Exosc9	EXOSC9
UF_Msa_AF_109140	ext2	Ext2	EXT2
UF_Msa_AF_102062	extl2	Extl2	EXTL2
UF_Msa_AF_110141	ezra	Ezr	EZR
UF_Msa_AF_109867	ezra	Ezr	EZR
UF_Msa_AF_103278	ezrb	Ezr	EZR
UF_Msa_AF_106140	f13a1b	F13a1	F13A1
UF_Msa_AF_106400	cfhl4	F13b	F13B
UF_Msa_AD_200367	f2	F2	F2
UF_Msa_AD_200303	f2	F2	F2
UF_Msa_AF_109380	f2	F2	F2
UF_Msa_AF_101232	f2	F2	F2
UF_Msa_CF_120463	f2r	F2r	F2R
UF_Msa_AD_200060	f7	F7	F7
UF_Msa_AD_200335	f7	F7	F7
UF_Msa_AF_106685	f7	F7	F7
UF_Msa_AF_104414	f8	F8	F8
UF_Msa_AF_103131	fabp1b.1	Fabp1	FABP1
UF_Msa_AF_100832	fabp1a	Fabp1	FABP1
UF_Msa_CF_127113	fabp1a	Fabp1	FABP1
UF_Msa_CF_118340	fabp1a	Fabp1	FABP1
UF_Msa_AF_105380	fabp10a	Fabp3	FABP3
UF_Msa_AF_100924	fabp7a	Fabp7	FABP7
UF_Msa_AF_103080	fabp7a	Fabp7	FABP7
UF_Msa_AF_109790	nmnat1-rbp7a	Fabp9	FABP9
UF_Msa_AF_101399	rbp5	Fabp9	FABP9
UF_Msa_AF_101616	fads2	Fads2	FADS2
UF_Msa_AF_100742	faf2	Faf2	FAF2
UF_Msa_AF_109064	fahd1	Fahd1	FAHD1
UF_Msa_AF_101558	fahd2a	Fahd2a	FAHD2A
UF_Msa_AF_100796	faima	Faim	FAIM
UF_Msa_AF_104050	faim2b	Faim2	FAIM2
UF_Msa_AF_106828	fam117ab	Fam117a	FAM117A
UF_Msa_AF_106549	fam120a	Fam120a	FAM120A
UF_Msa_AF_100483	fam133b	Fam133b	FAM133B
UF_Msa_AF_105627	fam135a	Fam135a	FAM135A
UF_Msa_AF_105764	fam136a	Fam136a	FAM136A
UF_Msa_AF_101938	fam162a	Fam162a	FAM162A
UF_Msa_AF_106390	fam168b	Fam168b	FAM168B
UF_Msa_AF_102874	fam193a	Fam193a	FAM193A
UF_Msa_CF_121525	fam199x	Fam199x	FAM199X
UF_Msa_AF_104191	fam204a	Fam204a	FAM204A
UF_Msa_AF_100978	fam210aa	Fam210a	FAM210A
UF_Msa_AF_102902	fam210b	Fam210b	FAM210B
UF_Msa_AF_109583	fam210b	Fam210b	FAM210B
UF_Msa_CF_124926	fam214a	Fam214a	FAM214A
UF_Msa_AF_102867	fam43a	Fam43a	FAM43A
UF_Msa_AF_103920	fam50a	Fam50a	FAM50A
UF_Msa_AF_100526	fam50a	Fam50a	FAM50A
UF_Msa_AF_103682	fam50a	Fam50a	FAM50A
UF_Msa_AF_105370	fam53b	Fam53b	FAM53B
UF_Msa_CF_125113	FAM53C	Fam53c	FAM53C
UF_Msa_CF_119671	fam76b	Fam76b	FAM76B
UF_Msa_CF_127441	fam78ba	Fam78b	FAM78B
UF_Msa_AF_101958	fam83d	Fam83d	FAM83D
UF_Msa_AF_109909	fam83fb	Fam83f	FAM83F
UF_Msa_AF_100014	fam89a	Fam89a	FAM89A
UF_Msa_AF_102973	fam8a1b	Fam8a1	FAM8A1
UF_Msa_AF_107461	fancm	Fancm	FANCM
UF_Msa_AF_107454	far1	Far1	FAR1
UF_Msa_AF_106252	far1	Far1	FAR1
UF_Msa_AF_104976	farp1	Farp1	FARP1
UF_Msa_AF_102565	farp2	Farp2	FARP2
UF_Msa_AF_104321	farsb	Farsb	FARSB
UF_Msa_AF_107621	farsb	Farsb	FARSB
UF_Msa_AF_100425	fasn	Fasn	FASN
UF_Msa_CF_125181	fastkd1	Fastkd1	FASTKD1
UF_Msa_AF_104189	fastkd3	Fastkd3	FASTKD3
UF_Msa_AF_100267	faua	Fau	FAU
UF_Msa_AF_102496	fbl	Fbl	FBL
UF_Msa_AF_103763	fbl	Fbl	FBL
UF_Msa_CF_120087	fblim1	Fblim1	FBLIM1
UF_Msa_AF_110058	fbp1b	Fbp1	FBP1
UF_Msa_AF_102747	fbrs	Fbrs	FBRS
UF_Msa_AF_108442	fbxl14b	Fbxl14	FBXL14
UF_Msa_AF_104675	fbxl14b	Fbxl14	FBXL14
UF_Msa_CF_120070	fbxl16	Fbxl16	FBXL16
UF_Msa_AF_103021	fbxl16	Fbxl16	FBXL16
UF_Msa_AF_102699	fbxl16	Fbxl16	FBXL16
UF_Msa_AF_102258	fbxl18	Fbxl18	FBXL18
UF_Msa_CF_122800	zgc:158376	Fbxl19	FBXL19
UF_Msa_CF_126100	fbxl3l	Fbxl21	FBXL21P
UF_Msa_AF_110093	fbxl4	Fbxl4	FBXL4
UF_Msa_AF_109749	fbxl5	Fbxl5	FBXL5
UF_Msa_AF_106970	fbxo11a	Fbxo11	FBXO11
UF_Msa_CF_121646	fbxo22	Fbxo22	FBXO22
UF_Msa_AF_104521	fbxo25	Fbxo25	FBXO25
UF_Msa_AF_109062	fbxo25	Fbxo25	FBXO25
UF_Msa_AF_107206	fbxo30b	Fbxo30	FBXO30
UF_Msa_CF_125716	fbxo43	Fbxo43	FBXO43
UF_Msa_CF_126745	fbxo5	Fbxo5	FBXO5
UF_Msa_AF_109763	zgc:153722	Fbxo6	FBXO6
UF_Msa_CF_120742	fbxo9	Fbxo9	FBXO9
UF_Msa_AF_107074	fcf1	Fcf1	FCF1
UF_Msa_AF_108822	fcho2	Fcho2	FCHO2
UF_Msa_AF_100628	fcho2	Fcho2	FCHO2
UF_Msa_AF_105122	fdps	Fdps	FDPS
UF_Msa_AF_107603	fdx1	Fdx1	FDX1
UF_Msa_AF_104815	fdx2	Fdx2	FDX2
UF_Msa_AF_100612	fem1a	Fem1a	FEM1A
UF_Msa_CF_118704	fes	Fes	FES
UF_Msa_AF_107208	fetub	Fetub	FETUB
UF_Msa_AF_110107	fga	Fga	FGA
UF_Msa_AD_200249	fgb	Fgb	FGB
UF_Msa_AD_200117	fgb	Fgb	FGB
UF_Msa_AF_101707	fgb	Fgb	FGB
UF_Msa_AF_102942	fgb	Fgb	FGB
UF_Msa_AF_110219	fgd4a	Fgd4	FGD4
UF_Msa_AF_104174	fgf12a	Fgf12	FGF12
UF_Msa_AF_109783	fgf17	Fgf17	FGF17
UF_Msa_CF_125653	fgf18a	Fgf18	FGF18
UF_Msa_AF_108435	fgfr1b	Fgfr1	FGFR1
UF_Msa_CF_118216	fgfr1b	Fgfr1	FGFR1
UF_Msa_AF_101800	fgg	Fgg	FGG
UF_Msa_AF_109263	fgg	Fgg	FGG
UF_Msa_AF_109316	yrk	Fgr	FGR
UF_Msa_AF_106598	fh	Fh1	FH
UF_Msa_AF_103554	fhl1a	Fhl1	FHL1
UF_Msa_CF_117831	fhod3b	Fhod3	FHOD3
UF_Msa_CF_125338	ficd	Ficd	FICD
UF_Msa_AF_110184	figla	Figla	FIGLA
UF_Msa_AF_110242	fignl1	Fignl1	FIGNL1
UF_Msa_AF_105108	fis1	Fis1	FIS1
UF_Msa_AF_107812	fkbp1ab	Fkbp1a	FKBP1A
UF_Msa_AF_102229	fkbp1ab	Fkbp1a	FKBP1A
UF_Msa_CF_126406	fkbp1ab	Fkbp1a	FKBP1A
UF_Msa_AF_109664	fkbp1aa	Fkbp1a	FKBP1A
UF_Msa_AF_107203	fkbp3	Fkbp3	FKBP3
UF_Msa_AF_109750	fkbp4	Fkbp4	FKBP4
UF_Msa_CF_120772	fkbp6	Fkbp6	FKBP6
UF_Msa_AF_105742	fkbp8	Fkbp8	FKBP8
UF_Msa_AF_102940	fktn	Fktn	FKTN
UF_Msa_AF_100081	flnca	Flnc	FLNC
UF_Msa_AF_104301	flot1b	Flot1	FLOT1
UF_Msa_AF_104904	flot2a	Flot2	FLOT2
UF_Msa_CF_121254	fmn2b	Fmn2	FMN2
UF_Msa_CF_123374	fmnl2b	Fmnl2	FMNL2
UF_Msa_CF_126283	fn1a	Fn1	FN1
UF_Msa_AF_102544	fn1b	Fn1	FN1
UF_Msa_AF_109929	fndc3a	Fndc3a	FNDC3A
UF_Msa_AF_102627	fntb	Fntb	FNTB
UF_Msa_AF_101956	focad	Focad	FOCAD
UF_Msa_CF_126454	focad	Focad	FOCAD
UF_Msa_CF_120206	focad	Focad	FOCAD
UF_Msa_CF_123151	folr	Folr1	FOLR1
UF_Msa_AF_105525	fosab	Fos	FOS
UF_Msa_AF_100123	fosab	Fos	FOS
UF_Msa_AF_108444	foxc1a	Foxc1	FOXC1
UF_Msa_AF_102046	foxi2	Foxi3	FOXI3
UF_Msa_AF_109752	foxm1	Foxm1	FOXM1
UF_Msa_AF_103957	foxm1	Foxm1	FOXM1
UF_Msa_AF_102778	foxn2b	Foxn2	FOXN2
UF_Msa_AF_109090	foxp1a	Foxp1	FOXP1
UF_Msa_AF_109435	foxp1b	Foxp1	FOXP1
UF_Msa_AF_104355	foxr1	Foxr2	FOXR2
UF_Msa_AF_101862	fpgs	Fpgs	FPGS
UF_Msa_AF_101849	frg1	Frg1	FRG1
UF_Msa_AF_100340	fsd1	Fsd1	FSD1
UF_Msa_AD_200213	fsta	Fst	FST
UF_Msa_AD_200131	fsta	Fst	FST
UF_Msa_AF_104341	fsta	Fst	FST
UF_Msa_AF_106191	fstl5	Fstl5	FSTL5
UF_Msa_AF_102481	fth1a	Fth1	FTH1
UF_Msa_AF_103119	fth1b	Fth1	FTH1
UF_Msa_AF_108000	fth1a	Fth1	FTH1
UF_Msa_AF_103466	fth1a	Fth1	FTH1
UF_Msa_AF_108585	fthl27	Ftmt	FTMT
UF_Msa_AF_105865	fthl28	Ftmt	FTMT
UF_Msa_AF_104055	fthl27	Ftmt	FTMT
UF_Msa_AF_109773	ftsj1	Ftsj1	FTSJ1
UF_Msa_AF_106620	ftsj3	Ftsj3	FTSJ3
UF_Msa_AF_102688	ftsj3	Ftsj3	FTSJ3
UF_Msa_CF_124554	fubp1	Fubp1	FUBP1
UF_Msa_AF_108938	fundc1	Fundc1	FUNDC1
UF_Msa_CF_123032	fus	Fus	FUS
UF_Msa_AF_102083	fut8a	Fut8	FUT8
UF_Msa_AF_104465	fuz	Fuz	FUZ
UF_Msa_AF_105207	fxn	Fxn	FXN
UF_Msa_AF_108481	fxr2	Fxr2	FXR2
UF_Msa_CF_120934	si:ch211-188c16.1	Fyb	FYB1
UF_Msa_AF_102278	si:ch211-188c16.1	Fyb	FYB1
UF_Msa_AF_100807	si:ch211-188c16.1	Fyb	FYB1
UF_Msa_CF_122974	si:ch211-188c16.1	Fyb	FYB1
UF_Msa_AF_100528	fzd3a	Fzd3	FZD3
UF_Msa_AF_100642	fzd7a	Fzd7	FZD7
UF_Msa_AF_106721	G3BP2	G3bp2	G3BP2
UF_Msa_AF_100348	g6pc3	G6pc3	G6PC3
UF_Msa_AF_103239	gaa	Gaa	GAA
UF_Msa_AF_102739	zgc:92606	Gabarap	GABARAP
UF_Msa_AF_104211	gabarapb	Gabarap	GABARAP
UF_Msa_AF_103854	map1lc3c	Gabarap	GABARAP
UF_Msa_AF_106649	gabarapl2	Gabarapl2	GABARAPL2
UF_Msa_AF_103834	gabbr1b	Gabbr1	GABBR1
UF_Msa_AF_108474	gabpa	Gabpa	GABPA
UF_Msa_AF_104835	gabpa	Gabpa	GABPA
UF_Msa_AF_101697	gabpa	Gabpa	GABPA
UF_Msa_AF_101020	gabpa	Gabpa	GABPA
UF_Msa_AF_109489	gabpa	Gabpa	GABPA
UF_Msa_AF_106054	gabra6b	Gabra6	GABRA6
UF_Msa_AF_107775	gabrb3	Gabrb3	GABRB3
UF_Msa_AF_108143	gabrb3	Gabrb3	GABRB3
UF_Msa_AF_101088	gabrd	Gabrd	GABRD
UF_Msa_AF_107887	gabrg2	Gabrg2	GABRG2
UF_Msa_AD_200190	gabrg2	Gabrg2	GABRG2
UF_Msa_AD_200291	gabrg2	Gabrg2	GABRG2
UF_Msa_AF_104845	gabrg2	Gabrg2	GABRG2
UF_Msa_AF_107029	gad1a	Gad1	GAD1
UF_Msa_AD_200148	gad1b	Gad1	GAD1
UF_Msa_AD_200195	gad1b	Gad1	GAD1
UF_Msa_AD_200183	gad2	Gad2	GAD2
UF_Msa_AD_200193	gad2	Gad2	GAD2
UF_Msa_AF_102770	gadd45gip1	Gadd45gip1	GADD45GIP1
UF_Msa_AF_107133	gadd45gip1	Gadd45gip1	GADD45GIP1
UF_Msa_AF_107791	gale	Gale	GALE
UF_Msa_AF_100445	galk1	Galk1	GALK1
UF_Msa_CF_120693	galk2	Galk2	GALK2
UF_Msa_AF_105448	galm	Galm	GALM
UF_Msa_AF_104202	galns	Galns	GALNS
UF_Msa_AF_101502	galnt17	Galnt17	GALNT17
UF_Msa_AF_105094	galnt2	Galnt2	GALNT2
UF_Msa_AF_100935	galnt8b.2	Galnt9	GALNT9
UF_Msa_CF_118220	galr2a	Galr2	GALR2
UF_Msa_AF_103483	gamt	Gamt	GAMT
UF_Msa_AF_103606	gamt	Gamt	GAMT
UF_Msa_AF_108007	ganab	Ganab	GANAB
UF_Msa_AF_109576	GANAB	Ganab	GANAB
UF_Msa_AF_107799	gapdh	Gapdh	GAPDH
UF_Msa_AF_106918	gapdh	Gapdh	GAPDH
UF_Msa_AF_107558	gapdh	Gapdh	GAPDH
UF_Msa_AF_109983	gapdhs	Gapdhs	GAPDHS
UF_Msa_AF_102875	gatc	Gatc	GATC
UF_Msa_AF_109806	gatd1	Gatd1	GATD1
UF_Msa_AF_109641	zgc:162944	Gatd3a	GATD3
UF_Msa_AF_103988	zgc:162944	Gatd3a	GATD3
UF_Msa_AF_108631	gba	Gba	GBA
UF_Msa_AF_104857	gbe1b	Gbe1	GBE1
UF_Msa_AF_103965	gcdhb	Gcdh	GCDH
UF_Msa_AD_200141	gclc	Gclc	GCLC
UF_Msa_AD_200158	gclc	Gclc	GCLC
UF_Msa_AF_108424	gclc	Gclc	GCLC
UF_Msa_AF_102580	gcshb	Gcsh	GCSH
UF_Msa_AF_106045	gcsha	Gcsh	GCSH
UF_Msa_AF_107472	gdap1l1	Gdap1l1	GDAP1L1
UF_Msa_AF_103572	gdf3	Gdf3	GDF3
UF_Msa_AF_103210	gdi2	Gdi2	GDI2
UF_Msa_AF_103052	gdpd4a	Gdpd4	GDPD4
UF_Msa_AF_105377	GDPGP1	Gdpgp1	GDPGP1
UF_Msa_CF_122914	gemin2	Gemin2	GEMIN2
UF_Msa_AF_103079	gemin5	Gemin5	GEMIN5
UF_Msa_CF_117786	gemin5	Gemin5	GEMIN5
UF_Msa_AF_101498	gemin5	Gemin5	GEMIN5
UF_Msa_AF_103911	gemin7	Gemin7	GEMIN7
UF_Msa_AF_109775	gemin8	Gemin8	GEMIN8
UF_Msa_AF_102535	get1	Get1	GRHL3
UF_Msa_AF_101409	get3	Get3
UF_Msa_AF_101174	get3	Get3
UF_Msa_CF_123537	get4	Get4	GET4
UF_Msa_AF_104884	get4	Get4	GET4
UF_Msa_AF_103314	gfm1	Gfm1	GFM1
UF_Msa_AF_104300	gfm2	Gfm2	GFM2
UF_Msa_AF_100809	gfpt1	Gfpt1	GFPT1
UF_Msa_CF_120610	gfra2a	Gfra2	GFRA2
UF_Msa_AF_103359	gga1	Gga1	GGA1
UF_Msa_CF_125481	ggnbp2	Ggnbp2	GGNBP2
UF_Msa_CF_123675	ggnbp2	Ggnbp2	GGNBP2
UF_Msa_AF_108281	ggnbp2	Ggnbp2	GGNBP2
UF_Msa_AF_100787	ggps1	Ggps1	GGPS1
UF_Msa_AF_106967	gh1	Gh	GH1
UF_Msa_AD_200185	gh1	Gh	GH1
UF_Msa_AD_200219	gh1	Gh	GH1
UF_Msa_AF_110195	gid8b	Gid8	GID8
UF_Msa_AF_102927	gid8a	Gid8	GID8
UF_Msa_CF_119001	gid8a	Gid8	GID8
UF_Msa_CF_124435	si:dkey-167k11.5	Gimap6	GIMAP6
UF_Msa_AF_102954	si:dkey-167k11.5	Gimap6	GIMAP6
UF_Msa_AF_109754	gins4	Gins4	GINS4
UF_Msa_AF_102681	gipc1	Gipc1	GIPC1
UF_Msa_AF_100758	git2a	Git2	GIT2
UF_Msa_AF_101695	cx32.2	Gja4	GJA4
UF_Msa_AF_104861	gkap1	Gkap1	GKAP1
UF_Msa_AF_104929	gkap1	Gkap1	GKAP1
UF_Msa_AF_105962	gla	Gla	GLA
UF_Msa_AF_100888	im:7150988	Glipr2	GLIPR2
UF_Msa_CF_124977	glmp	Glmp	GLMP
UF_Msa_AF_102347	glo1	Glo1	GLO1
UF_Msa_AF_104231	glod5	Glod5	GLOD5
UF_Msa_AF_104250	glrx	Glrx	GLRX
UF_Msa_AF_105315	glrx3	Glrx3	GLRX3
UF_Msa_AF_105740	glrx5	Glrx5	GLRX5
UF_Msa_AF_110118	zgc:92907	Glt28d2	ALG13
UF_Msa_AF_102532	glud1b	Glud1	GLUD1
UF_Msa_AF_102511	glula	Glul	GLUL
UF_Msa_AF_108175	faxdc2	Gm12248	FAXDC2
UF_Msa_CF_121248	zgc:194312	Gm15433	GPR148
UF_Msa_AF_106353	pcdh2aa15	Gm37013	PCDHA4
UF_Msa_AF_101835	C17H14orf28	Gm527	C14orf28
UF_Msa_AF_106350	si:ch73-109d9.2	Gm7145	ZNF658
UF_Msa_CF_120221	or135-1	Gm7592
UF_Msa_AF_104039	gmds	Gmds	GMDS
UF_Msa_AF_103645	gmppaa	Gmppa	GMPPA
UF_Msa_CF_122243	gmps	Gmps	GMPS
UF_Msa_AF_101206	gna15.1	Gna15	GNA15
UF_Msa_CF_119525	gna15.1	Gna15	GNA15
UF_Msa_CF_120809	gnav1	Gnao1	GNAO1
UF_Msa_CF_119595	gnav1	Gnao1	GNAO1
UF_Msa_AF_107660	gnav1	Gnao1	GNAO1
UF_Msa_CF_121085	gnav1	Gnao1	GNAO1
UF_Msa_AF_101831	gnav1	Gnao1	GNAO1
UF_Msa_AF_100179	gnaq	Gnaq	GNAQ
UF_Msa_AF_103390	gnas	Gnas	GNAS
UF_Msa_AF_100268	gnb1b	Gnb1	GNB1
UF_Msa_AF_105371	gnb1b	Gnb1	GNB1
UF_Msa_AF_100469	gnb1b	Gnb1	GNB1
UF_Msa_AF_100111	gnl3	Gnl3	GNL3
UF_Msa_AF_103003	gnl3l	Gnl3l	GNL3L
UF_Msa_AF_108826	gnl3l	Gnl3l	GNL3L
UF_Msa_AF_109725	gnpda1	Gnpda1	GNPDA1
UF_Msa_AF_106849	gnpda1	Gnpda1	GNPDA1
UF_Msa_AD_200343	gnrh3	Gnrh1	GNRH1
[truncated: 4,243 more rows]

## Sheet: Fathead minnow
Ppromelas gene	Zebrafish gene	Mouse gene	Human gene
UF_Ppr_AF_112019	zgc:112185	1110038F14Rik	C8orf33
UF_Ppr_AF_104324	si:ch211-163l21.7	1700013F07Rik	C1orf194
UF_Ppr_AF_107480	si:dkey-73n10.1	1700017B05Rik	C15orf39
UF_Ppr_AF_103706	si:dkey-73n10.1	1700017B05Rik	C15orf39
UF_Ppr_AF_117365	zgc:55943	1700025G04Rik	C1orf21
UF_Ppr_AF_118525	zgc:153521	1700066M21Rik	C2orf69
UF_Ppr_AF_104512	si:dkey-43k4.3	1700088E04Rik	C22orf23
UF_Ppr_AF_111962	fb59e09	1810013L24Rik	C16orf72
UF_Ppr_AF_109619	si:dkey-57n24.6	1810020O05Rik	CFAP92
UF_Ppr_AF_109325	si:dkey-57n24.6	1810020O05Rik	CFAP92
UF_Ppr_AF_110753	zgc:158432	2010106E10Rik	MEP1B
UF_Ppr_AF_101603	si:ch73-280o22.2	2210408I21Rik	KIAA0825
UF_Ppr_AF_106681	si:rp71-19m20.1	2310057M21Rik	C10orf88
UF_Ppr_AF_117888	si:ch211-215a10.4	2310061I04Rik	C6orf136
UF_Ppr_AF_101385	si:ch211-215a10.4	2310061I04Rik	C6orf136
UF_Ppr_AF_113627	si:dkeyp-104h9.5	2510039O18Rik	KIAA2013
UF_Ppr_AF_112633	zgc:112416	2610028H24Rik	C21orf58
UF_Ppr_AF_113718	si:ch211-185a18.2	2700049A03Rik	KIAA0586
UF_Ppr_AF_101913	si:ch211-185a18.2	2700049A03Rik	KIAA0586
UF_Ppr_AF_105354	si:ch73-138n13.1	2900026A02Rik	KIAA1671
UF_Ppr_AF_109748	si:dkeyp-44a8.2	4833439L19Rik	KIAA1191
UF_Ppr_AF_118365	si:dkeyp-44a8.2	4833439L19Rik	KIAA1191
UF_Ppr_AF_109365	zgc:123105	4833439L19Rik	KIAA1191
UF_Ppr_AF_117041	zgc:123105	4833439L19Rik	KIAA1191
UF_Ppr_AF_106593	si:ch211-233a24.2	4932438A13Rik	KIAA1109
UF_Ppr_AF_109729	zgc:172139	5031439G07Rik	KIAA0930
UF_Ppr_AF_112310	zgc:91860	6430548M08Rik	KIAA0513
UF_Ppr_AF_109370	soga3a	9330159F19Rik	KIAA0408
UF_Ppr_AF_100073	soga3a	9330159F19Rik	KIAA0408
UF_Ppr_AF_106080	si:ch211-157b11.12	9430015G10Rik	C1orf159
UF_Ppr_AF_104096	si:ch73-269m14.2	9530068E07Rik	C5orf15
UF_Ppr_AF_110507	si:dkey-222b8.4	9530077C05Rik	KIAA0895
UF_Ppr_AM_119787	irgq1	9930111J21Rik1	IRGC
UF_Ppr_AF_115252	a1cf	A1cf	A1CF
UF_Ppr_AF_111663	si:ch211-147a11.3	A430005L14Rik	C1orf174
UF_Ppr_AF_105960	zgc:158258	AA986860	C1orf116
UF_Ppr_AF_104148	aacs	Aacs	AACS
UF_Ppr_AF_102678	aak1a	Aak1	AAK1
UF_Ppr_AF_115176	aarsd1	Aarsd1	AARSD1
UF_Ppr_AF_109400	aasdh	Aasdh	AASDH
UF_Ppr_AF_117149	abca1b	Abca1	ABCA1
UF_Ppr_AF_111917	abca12	Abca12	ABCA12
UF_Ppr_AF_105292	abca3b	Abca3	ABCA3
UF_Ppr_AF_119032	abca4a	Abca4	ABCA4
UF_Ppr_AF_116948	abca5	Abca5	ABCA5
UF_Ppr_AF_108253	abcb6a	Abcb6	ABCB6
UF_Ppr_AF_106384	abcb7	Abcb7	ABCB7
UF_Ppr_AF_111913	abcb8	Abcb8	ABCB8
UF_Ppr_AM_119321	abcc1	Abcc1	ABCC1
UF_Ppr_AF_111725	abcc3	Abcc3	ABCC3
UF_Ppr_AF_118606	abcc13	Abcc6	ABCC6
UF_Ppr_AF_112610	abcc8	Abcc8	ABCC8
UF_Ppr_AF_102666	abcc9	Abcc9	ABCC9
UF_Ppr_AF_100682	abcd1	Abcd1	ABCD1
UF_Ppr_AF_106398	abcd3a	Abcd3	ABCD3
UF_Ppr_AF_117712	abcd4	Abcd4	ABCD4
UF_Ppr_AF_109028	abce1	Abce1	ABCE1
UF_Ppr_AF_108431	abcf1	Abcf1	ABCF1
UF_Ppr_AF_107398	abcf2a	Abcf2	ABCF2
UF_Ppr_AF_105711	abcg2b	Abcg2	ABCG2
UF_Ppr_AF_103583	abcg2a	Abcg2	ABCG2
UF_Ppr_AF_112322	abcg8	Abcg8	ABCG8
UF_Ppr_AF_101306	tagln3b	Abhd10	ABHD10
UF_Ppr_AF_110947	abhd11	Abhd11	ABHD11
UF_Ppr_AF_100389	abhd13	Abhd13	ABHD13
UF_Ppr_AF_112873	abhd14a	Abhd14a	ABHD14A
UF_Ppr_AF_110488	abhd16a	Abhd16a	ABHD16A
UF_Ppr_AF_116394	abhd17ab	Abhd17a	ABHD17A
UF_Ppr_AF_108280	abhd17c	Abhd17c	ABHD17C
UF_Ppr_AF_112319	abhd18	Abhd18	ABHD18
UF_Ppr_AF_107410	abhd4	Abhd4	ABHD4
UF_Ppr_AF_115944	abi1a	Abi1	ABI1
UF_Ppr_AF_114489	abi3bpb	Abi3bp	ABI3BP
UF_Ppr_AF_116004	abi3bpb	Abi3bp	ABI3BP
UF_Ppr_AF_118078	abl2	Abl2	ABL2
UF_Ppr_AF_113189	ablim1a	Ablim1	ABLIM1
UF_Ppr_AF_116029	ablim1b	Ablim1	ABLIM1
UF_Ppr_AF_118945	ablim1b	Ablim1	ABLIM1
UF_Ppr_AF_103057	ablim3	Ablim3	ABLIM3
UF_Ppr_AF_105889	si:dkey-33c9.6	Abr	ABR
UF_Ppr_AF_118938	ABR	Abr	ABR
UF_Ppr_AF_100846	abraxas2	Abraxas2	ABRAXAS2
UF_Ppr_AF_114547	abt1	Abt1	ABT1
UF_Ppr_AF_101273	abtb1	Abtb1	ABTB1
UF_Ppr_AM_120550	acaa1	Acaa1a	ACAA1
UF_Ppr_AF_106170	acacb	Acacb	ACACB
UF_Ppr_AF_107775	acacb	Acacb	ACACB
UF_Ppr_AF_107455	acad11	Acad11	ACAD11
UF_Ppr_AF_103350	acadm	Acadm	ACADM
UF_Ppr_AF_117338	acadvl	Acadvl	ACADVL
UF_Ppr_AF_100066	acap2	Acap2	ACAP2
UF_Ppr_AF_107912	zgc:162872	Acap3	ACAP3
UF_Ppr_AF_102618	acap3b	Acap3	ACAP3
UF_Ppr_AF_104804	acbd3	Acbd3	ACBD3
UF_Ppr_AF_111802	acbd4	Acbd4	ACBD4
UF_Ppr_AF_110956	acbd5a	Acbd5	ACBD5
UF_Ppr_AF_114265	acbd6	Acbd6	ACBD6
UF_Ppr_AF_107401	accs	Accs	ACCS
UF_Ppr_AF_101090	ace	Ace	ACE
UF_Ppr_AF_104259	acer3	Acer3	ACER3
UF_Ppr_AF_112185	ache	Ache	ACHE
UF_Ppr_AF_105615	acin1a	Acin1	ACIN1
UF_Ppr_AF_101825	ackr3a	Ackr3	ACKR3
UF_Ppr_AF_116315	aclya	Acly	ACLY
UF_Ppr_AF_110234	aco1	Aco1	ACO1
UF_Ppr_AF_115350	aco2	Aco2	ACO2
UF_Ppr_AF_112544	irg1l	Acod1	ACOD1
UF_Ppr_AF_118920	acot11a	Acot11	ACOT11
UF_Ppr_AF_103879	acot19	Acot3	ACOT1
UF_Ppr_AF_115271	acot17	Acot6	ACOT6
UF_Ppr_AF_105136	acot8	Acot8	ACOT8
UF_Ppr_AF_105338	acox1	Acox1	ACOX1
UF_Ppr_AF_100256	acoxl	Acoxl	ACOXL
UF_Ppr_AF_118893	acp2	Acp2	ACP2
UF_Ppr_AF_113617	acp7	Acp7	ACP7
UF_Ppr_AF_110696	acsbg1	Acsbg1	ACSBG1
UF_Ppr_AF_107994	acsbg2	Acsbg2	ACSBG2
UF_Ppr_AF_117539	acsf2	Acsf2	ACSF2
UF_Ppr_AF_104765	acsl1a	Acsl1	ACSL1
UF_Ppr_AF_102536	acsl3b	Acsl3	ACSL3
UF_Ppr_AF_109147	acsl3b	Acsl3	ACSL3
UF_Ppr_AF_110469	acsl4a	Acsl4	ACSL4
UF_Ppr_AF_119081	acsl4a	Acsl4	ACSL4
UF_Ppr_AF_100863	acsl5	Acsl5	ACSL5
UF_Ppr_AF_100678	acss2	Acss2	ACSS2
UF_Ppr_AF_108703	acss3	Acss3	ACSS3
UF_Ppr_AF_112272	acta2	Acta2	ACTA2
UF_Ppr_AF_108323	actb1	Actb	ACTB
UF_Ppr_AF_109299	actb2	Actb	ACTB
UF_Ppr_AF_118671	actb2	Actb	ACTB
UF_Ppr_AF_111230	actn3a	Actn3	ACTN3
UF_Ppr_AF_111040	actr1	Actr1b	ACTR1B
UF_Ppr_AF_114973	actr1	Actr1b	ACTR1B
UF_Ppr_AF_108094	actr2a	Actr2	ACTR2
UF_Ppr_AF_102937	actr8	Actr8	ACTR8
UF_Ppr_AF_111081	si:ch211-241j12.3	Actrt3	ACTRT3
UF_Ppr_AF_116786	acvr1l	Acvr1	ACVR1
UF_Ppr_AF_115943	acvr1bb	Acvr1b	ACVR1B
UF_Ppr_AF_104253	acvr2aa	Acvr2a	ACVR2A
UF_Ppr_AF_105622	ada	Ada	ADA
UF_Ppr_AF_103016	adad1	Adad1	ADAD1
UF_Ppr_AF_118414	adam10b	Adam10	ADAM10
UF_Ppr_AF_116023	adam11	Adam11	ADAM11
UF_Ppr_AF_117736	ADAM12	Adam12	ADAM12
UF_Ppr_AF_101448	adam12	Adam12	ADAM12
UF_Ppr_AF_106154	adam15	Adam15	ADAM15
UF_Ppr_AM_119775	adam15	Adam15	ADAM15
UF_Ppr_AF_103754	adam17a	Adam17	ADAM17
UF_Ppr_AF_106840	adam19b	Adam19	ADAM19
UF_Ppr_AF_104449	adam22	Adam22	ADAM22
UF_Ppr_AF_116487	adam22	Adam22	ADAM22
UF_Ppr_AF_103088	adam23a	Adam23	ADAM23
UF_Ppr_AF_109163	adam28	Adam28	ADAM28
UF_Ppr_AF_102529	adam8b	Adam8	ADAM8
UF_Ppr_AF_105849	zgc:174164	Adam9	ADAM9
UF_Ppr_AF_109345	adamts1	Adamts1	ADAMTS1
UF_Ppr_AF_106564	adamts10	Adamts10	ADAMTS10
UF_Ppr_AF_118629	adamts17	Adamts17	ADAMTS17
UF_Ppr_AF_113174	si:ch211-154c21.1	Adamts2	ADAMTS2
UF_Ppr_AF_114417	adamts3	Adamts3	ADAMTS3
UF_Ppr_AF_115259	adamts6	Adamts6	ADAMTS6
UF_Ppr_AF_112727	adamtsl5	Adamtsl5	ADAMTSL5
UF_Ppr_AF_111763	zgc:92360	Adap1	ADAP1
UF_Ppr_AF_100649	adat3	Adat3	ADAT3
UF_Ppr_AF_105971	adcy2b	Adcy2	ADCY2
UF_Ppr_AF_107991	adcy6b	Adcy6	ADCY6
UF_Ppr_AF_100305	si:ch211-132f19.7	Adcy8	ADCY8
UF_Ppr_AF_106757	adcyap1b	Adcyap1	ADCYAP1
UF_Ppr_AF_114679	adcyap1b	Adcyap1	ADCYAP1
UF_Ppr_AF_101402	adcyap1r1a	Adcyap1r1	ADCYAP1R1
UF_Ppr_AF_115496	adcyap1r1a	Adcyap1r1	ADCYAP1R1
UF_Ppr_AF_112583	add1	Add1	ADD1
UF_Ppr_AF_110851	add2	Add2	ADD2
UF_Ppr_AM_120186	add3a	Add3	ADD3
UF_Ppr_AF_118441	add3a	Add3	ADD3
UF_Ppr_AF_106837	adgb	Adgb	ADGB
UF_Ppr_AF_106652	adgrb1a	Adgrb1	ADGRB1
UF_Ppr_AM_119214	adgrb1a	Adgrb1	ADGRB1
UF_Ppr_AF_114379	adgrb1a	Adgrb1	ADGRB1
UF_Ppr_AF_109872	adgrb2	Adgrb2	ADGRB2
UF_Ppr_AF_113407	adgrb3	Adgrb3	ADGRB3
UF_Ppr_AF_113362	adgrd2	Adgrd1	ADGRD1
UF_Ppr_AF_108191	adgrg1	Adgrg1	ADGRG1
UF_Ppr_AF_101572	adgrg3	Adgrg3	ADGRG3
UF_Ppr_AM_119786	adgrg7.1	Adgrg7	ADGRG7
UF_Ppr_AF_100725	adgrl2a	Adgrl2	ADGRL2
UF_Ppr_AM_120122	adgrl4	Adgrl4	ADGRL4
UF_Ppr_AF_111100	adipor1b	Adipor1	ADIPOR1
UF_Ppr_AF_107387	adipor1a	Adipor1	ADIPOR1
UF_Ppr_AF_105773	adipor2	Adipor2	ADIPOR2
UF_Ppr_AF_116096	adipor2	Adipor2	ADIPOR2
UF_Ppr_AM_119392	adipor2	Adipor2	ADIPOR2
UF_Ppr_AF_114943	adkb	Adk	ADK
UF_Ppr_AF_118168	adka	Adk	ADK
UF_Ppr_AF_108679	adma	Adm	ADM
UF_Ppr_AF_109761	adm2a	Adm2	ADM2
UF_Ppr_AM_119853	adm2a	Adm2	ADM2
UF_Ppr_AF_110188	adnpa	Adnp	ADNP
UF_Ppr_AF_106747	adnp2b	Adnp2	ADNP2
UF_Ppr_AF_116966	adob	Ado	ADO
UF_Ppr_AF_113048	adora2aa	Adora2a	ADORA2A
UF_Ppr_AF_116698	adpgk	Adpgk	ADPGK
UF_Ppr_AF_109344	adra1ba	Adra1b	ADRA1B
UF_Ppr_AF_105848	adra2c	Adra2c	ADRA2C
UF_Ppr_AF_112006	adrm1	Adrm1	ADRM1
UF_Ppr_AF_103518	adsl	Adsl	ADSL
UF_Ppr_AF_118385	aebp1	Aebp1	AEBP1
UF_Ppr_AF_110954	si:ch1073-459j12.1	Aebp1	AEBP1
UF_Ppr_AF_110106	aebp2	Aebp2	AEBP2
UF_Ppr_AF_116327	afap1l1b	Afap1l1	AFAP1L1
UF_Ppr_AF_102044	si:dkey-220o5.5	Afap1l2	AFAP1L2
UF_Ppr_AF_105301	afdna	Afdn	AFDN
UF_Ppr_AF_108905	aff4	Aff4	AFF4
UF_Ppr_AF_110081	aff4	Aff4	AFF4
UF_Ppr_AF_114546	aff4	Aff4	AFF4
UF_Ppr_AF_113080	afg1lb	Afg1l	AFG1L
UF_Ppr_AF_113765	si:ch1073-174d20.2	Afg3l1	AFG3L2
UF_Ppr_AF_118538	afg3l2	Afg3l2	AFG3L2
UF_Ppr_AF_115574	agbl2	Agbl2	AGBL2
UF_Ppr_AF_105312	agbl5	Agbl5	AGBL5
UF_Ppr_AF_118471	si:ch211-79k12.1	Ager	AGER
UF_Ppr_AF_114743	agfg1a	Agfg1	AGFG1
UF_Ppr_AF_112088	zgc:114045	Agfg2	AGFG2
UF_Ppr_AF_112792	aglb	Agl	AGL
UF_Ppr_AF_115753	agmo	Agmo	AGMO
UF_Ppr_AF_107852	ago1	Ago1	AGO1
UF_Ppr_AF_109921	agpat2	Agpat1	AGPAT1
UF_Ppr_AM_119551	agpat5	Agpat5	AGPAT5
UF_Ppr_AF_110652	agr2	Agr2	AGR2
UF_Ppr_AF_111752	agt	Agt	AGT
UF_Ppr_AF_104827	agtpbp1	Agtpbp1	AGTPBP1
UF_Ppr_AF_112890	agxtb	Agxt	AGXT
UF_Ppr_AF_100077	agxt2	Agxt2	AGXT2
UF_Ppr_AF_109682	ahctf1	Ahctf1	AHCTF1
UF_Ppr_AF_113179	ahcyl1	Ahcyl1	AHCYL1
UF_Ppr_AM_120540	ahdc1	Ahdc1	AHDC1
UF_Ppr_AF_107098	ahnak	Ahnak	AHNAK
UF_Ppr_AF_103647	ahr1b	Ahr	AHR
UF_Ppr_AF_108175	aida	Aida	AIDA
UF_Ppr_AF_112778	aifm1	Aifm1	AIFM1
UF_Ppr_AF_112608	aimp1a	Aimp1	AIMP1
UF_Ppr_AF_102589	aip	Aip	AIP
UF_Ppr_AF_115910	ajap1	Ajap1	AJAP1
UF_Ppr_AF_118021	unm_hu7912	Ajm1	AJM1
UF_Ppr_AF_111247	ajuba	Ajuba	AJUBA
UF_Ppr_AF_110118	ajuba	Ajuba	AJUBA
UF_Ppr_AF_109281	ak1	Ak1	AK1
UF_Ppr_AF_107649	ak4	Ak4	AK4
UF_Ppr_AF_114852	ak5	Ak5	AK5
UF_Ppr_AF_107637	ak7b	Ak7	AK7
UF_Ppr_AF_100807	ak9	Ak9	AK9
UF_Ppr_AF_111550	akap1b	Akap1	AKAP1
UF_Ppr_AF_106391	akap10	Akap10	AKAP10
UF_Ppr_AF_100713	akap11	Akap11	AKAP11
UF_Ppr_AF_118928	akap12b	Akap12	AKAP12
UF_Ppr_AF_106630	akap12b	Akap12	AKAP12
UF_Ppr_AF_106467	si:dkey-172h23.2	Akap13	AKAP13
UF_Ppr_AF_117985	akap13	Akap13	AKAP13
UF_Ppr_AF_116168	si:dkeyp-81f3.4	Akap14	AKAP14
UF_Ppr_AF_105970	si:dkey-125i10.3	Akap5	AKAP5
UF_Ppr_AF_112983	si:dkey-125i10.3	Akap5	AKAP5
UF_Ppr_AF_100260	akap6	Akap6	AKAP6
UF_Ppr_AF_108936	akap9	Akap9	AKAP9
UF_Ppr_AF_112128	akirin1	Akirin1	AKIRIN1
UF_Ppr_AF_103354	akirin2	Akirin2	AKIRIN2
UF_Ppr_AF_117761	akna	Akna	AKNA
UF_Ppr_AF_101718	akna	Akna	AKNA
UF_Ppr_AF_116021	zgc:101765	Akr1a1	AKR1A1
UF_Ppr_AF_118180	akr7a3	Akr7a5	AKR7A2
UF_Ppr_AF_118798	akt2	Akt2	AKT2
UF_Ppr_AF_112220	akt3b	Akt3	AKT3
UF_Ppr_AF_100182	aktip	Aktip	AKTIP
UF_Ppr_AF_112822	alas2	Alas2	ALAS2
UF_Ppr_AF_106493	alcama	Alcam	ALCAM
UF_Ppr_AF_105719	aldh18a1	Aldh18a1	ALDH18A1
UF_Ppr_AF_114178	aldh1a2	Aldh1a2	ALDH1A2
UF_Ppr_AF_114593	aldh1a2	Aldh1a2	ALDH1A2
UF_Ppr_AF_118160	aldh1a3	Aldh1a3	ALDH1A3
UF_Ppr_AF_112742	aldh1l1	Aldh1l1	ALDH1L1
UF_Ppr_AF_115302	aldh1l1	Aldh1l1	ALDH1L1
UF_Ppr_AF_107300	aldh3a2b	Aldh3a2	ALDH3A2
UF_Ppr_AF_109910	aldh3b1	Aldh3b1	ALDH3B1
UF_Ppr_AF_111925	aldh6a1	Aldh6a1	ALDH6A1
UF_Ppr_AF_102081	aldh7a1	Aldh7a1	ALDH7A1
UF_Ppr_AF_110736	aldh8a1	Aldh8a1	ALDH8A1
UF_Ppr_AF_102890	aldh9a1b	Aldh9a1	ALDH9A1
UF_Ppr_AF_102646	aldoaa	Aldoart2	ALDOA
UF_Ppr_AF_111005	alg1	Alg1	ALG1
UF_Ppr_AF_113261	alg11	Alg11	ALG11
UF_Ppr_AF_101601	alg12	Alg12	ALG12
UF_Ppr_AF_111959	alg2	Alg2	ALG2
UF_Ppr_AF_104125	alg5	Alg5	ALG5
UF_Ppr_AF_107714	alg9	Alg9	ALG9
UF_Ppr_AF_118517	alkbh1	Alkbh1	ALKBH1
UF_Ppr_AF_111249	alkbh5	Alkbh5	ALKBH5
UF_Ppr_AF_100899	alkbh6	Alkbh6	ALKBH6
UF_Ppr_AF_113788	alox12	Alox12	ALOX12
UF_Ppr_AF_111313	alpk3a	Alpk3	ALPK3
UF_Ppr_AF_107820	alpk3a	Alpk3	ALPK3
UF_Ppr_AF_117973	amd1	Amd2	AMD1
UF_Ppr_AM_120703	si:ch73-71d17.1	Amdhd1	AMDHD1
UF_Ppr_AF_102767	amdhd2	Amdhd2	AMDHD2
UF_Ppr_AF_116672	amer2	Amer2	AMER2
UF_Ppr_AF_112656	amer2	Amer2	AMER2
UF_Ppr_AF_117089	si:dkey-231j24.3	Amer3	AMER3
UF_Ppr_AF_107296	amfra	Amfr	AMFR
UF_Ppr_AF_118510	amigo1	Amigo1	AMIGO1
UF_Ppr_AF_103967	ammecr1	Ammecr1	AMMECR1
UF_Ppr_AF_108600	amn	Amn	AMN
UF_Ppr_AF_111485	amotl2b	Amotl2	AMOTL2
UF_Ppr_AF_111759	ampd2b	Ampd2	AMPD2
UF_Ppr_AF_114483	ampd2a	Ampd2	AMPD2
UF_Ppr_AF_112197	amph	Amph	AMPH
UF_Ppr_AF_109582	amph	Amph	AMPH
UF_Ppr_AF_114670	amt	Amt	AMT
UF_Ppr_AF_113060	zgc:92137	Amy1	AMY1A
UF_Ppr_AF_101604	anapc1	Anapc1	ANAPC1
UF_Ppr_AF_113010	anapc4	Anapc4	ANAPC4
UF_Ppr_AF_113141	anapc4	Anapc4	ANAPC4
UF_Ppr_AF_114520	anapc5	Anapc5	ANAPC5
UF_Ppr_AF_107124	angel2	Angel2	ANGEL2
UF_Ppr_AF_118054	angpt1	Angpt1	ANGPT1
UF_Ppr_AF_106773	angptl2b	Angptl2	ANGPTL2
UF_Ppr_AF_100048	angptl3	Angptl3	ANGPTL3
UF_Ppr_AF_107658	angptl4	Angptl4	ANGPTL4
UF_Ppr_AF_100877	angptl7	Angptl7	ANGPTL7
UF_Ppr_AF_106263	ank1b	Ank1	ANK1
UF_Ppr_AF_118610	ank1a	Ank1	ANK1
UF_Ppr_AF_111462	ank2b	Ank2	ANK2
UF_Ppr_AF_105846	ank2b	Ank2	ANK2
UF_Ppr_AF_118895	notchl	Ank3	ANK3
UF_Ppr_AF_107247	ankhd1	Ankhd1	ANKHD1-EIF4EBP3
UF_Ppr_AF_106292	ankk1	Ankk1	ANKK1
UF_Ppr_AF_109328	ankle2	Ankle2	ANKLE2
UF_Ppr_AF_111171	ankmy1	Ankmy1	ANKMY1
UF_Ppr_AF_100955	ankrd11	Ankrd11	ANKRD11
UF_Ppr_AF_112164	ankrd12	Ankrd12	ANKRD12
UF_Ppr_AF_102889	ankrd13a	Ankrd13a	ANKRD13A
UF_Ppr_AF_118981	ankrd13c	Ankrd13c	ANKRD13C
UF_Ppr_AF_109830	ankrd13d	Ankrd13d	ANKRD13D
UF_Ppr_AF_102707	ankrd16	Ankrd16	ANKRD16
UF_Ppr_AF_101927	ankrd27	Ankrd27	ANKRD27
UF_Ppr_AF_103847	ankrd33aa	Ankrd33	ANKRD33
UF_Ppr_AF_118847	ankrd40	Ankrd40	ANKRD40
UF_Ppr_AF_101908	ankrd44	Ankrd44	ANKRD44
UF_Ppr_AF_117605	ankrd45	Ankrd45	ANKRD45
UF_Ppr_AF_108317	ankrd46b	Ankrd46	ANKRD46
UF_Ppr_AF_108141	ankrd52a	Ankrd52	ANKRD52
UF_Ppr_AF_104694	ankrd54	Ankrd54	ANKRD54
UF_Ppr_AF_113532	ankrd55	Ankrd55	ANKRD55
UF_Ppr_AF_116884	si:ch211-203b8.6	Ankrd65	ANKRD65
UF_Ppr_AF_110439	si:ch211-203b8.6	Ankrd65	ANKRD65
UF_Ppr_AF_102985	anks1ab	Anks1	ANKS1A
UF_Ppr_AF_105240	anks1b	Anks1b	ANKS1B
UF_Ppr_AF_107829	anks3	Anks3	ANKS3
UF_Ppr_AF_115084	anks4b	Anks4b	ANKS4B
UF_Ppr_AF_111876	ankzf1	Ankzf1	ANKZF1
UF_Ppr_AF_105459	ano10b	Ano10	ANO10
UF_Ppr_AF_101375	ano10a	Ano10	ANO10
UF_Ppr_AF_116896	ano3	Ano3	ANO3
UF_Ppr_AF_109671	ano5a	Ano5	ANO5
UF_Ppr_AF_103289	ano5a	Ano5	ANO5
UF_Ppr_AF_116316	ano6	Ano6	ANO6
UF_Ppr_AF_108781	ano11	Ano7	ANO7
UF_Ppr_AF_102849	ano8a	Ano8	ANO8
UF_Ppr_AF_106376	ano9b	Ano9	ANO9
UF_Ppr_AF_118776	anp32a	Anp32a	ANP32A
UF_Ppr_AF_109576	anp32b	Anp32b	ANP32B
UF_Ppr_AF_113153	anp32e	Anp32e	ANP32E
UF_Ppr_AF_112284	antxr2a	Antxr2	ANTXR2
UF_Ppr_AF_116496	anxa11a	Anxa11	ANXA11
UF_Ppr_AF_114985	anxa13	Anxa13	ANXA13
UF_Ppr_AF_110436	anxa13	Anxa13	ANXA13
UF_Ppr_AF_101575	anxa5b	Anxa5	ANXA5
UF_Ppr_AF_101727	prnprs3	Anxa7	ANXA7
UF_Ppr_AF_114752	aoc2	Aoc3	AOC3
UF_Ppr_AF_103493	ap1ar	Ap1ar	AP1AR
UF_Ppr_AF_101766	ap1g2	Ap1g2	AP1G2
UF_Ppr_AF_112312	ap1m1	Ap1m1	AP1M1
UF_Ppr_AF_102691	ap1m1	Ap1m1	AP1M1
UF_Ppr_AF_111808	ap1m3	Ap1m2	AP1M2
UF_Ppr_AF_107566	ap1s1	Ap1s1	AP1S1
UF_Ppr_AF_116263	ap1s3b	Ap1s3	AP1S3
UF_Ppr_AF_116202	ap2a1	Ap2a1	AP2A1
UF_Ppr_AF_104079	ap2a1	Ap2a1	AP2A1
UF_Ppr_AF_108190	ap2b1	Ap2b1	AP2B1
UF_Ppr_AF_111425	ap2s1	Ap2s1	AP2S1
UF_Ppr_AF_112918	ap3d1	Ap3d1	AP3D1
UF_Ppr_AF_115095	ap3d1	Ap3d1	AP3D1
UF_Ppr_AF_114954	ap3s2	Ap3s2	AP3S2
UF_Ppr_AF_107868	ap4b1	Ap4b1	AP4B1
UF_Ppr_AF_118277	ap4e1	Ap4e1	AP4E1
UF_Ppr_AF_111986	ap4e1	Ap4e1	AP4E1
UF_Ppr_AF_118579	ap5b1	Ap5b1	AP5B1
UF_Ppr_AF_105126	ap5m1	Ap5m1	AP5M1
UF_Ppr_AF_111875	apaf1	Apaf1	APAF1
UF_Ppr_AF_117742	apba1b	Apba1	APBA1
UF_Ppr_AF_114585	apba2a	Apba2	APBA2
UF_Ppr_AF_108399	apbb1	Apbb1	APBB1
UF_Ppr_AF_101863	apbb1ip	Apbb1ip	APBB1IP
UF_Ppr_AF_116925	apbb2b	Apbb2	APBB2
UF_Ppr_AF_109032	apc	Apc	APC
UF_Ppr_AF_106697	apex2	Apex2	APEX2
UF_Ppr_AF_117732	zgc:114200	Aph1b	APH1B
UF_Ppr_AF_114487	zgc:114200	Aph1b	APH1B
UF_Ppr_AF_106212	api5	Api5	API5
UF_Ppr_AF_105468	zgc:165656	Aplf	APLF
UF_Ppr_AM_119396	apln	Apln	APLN
UF_Ppr_AF_115780	apln	Apln	APLN
UF_Ppr_AF_110828	aplnrb	Aplnr	APLNR
UF_Ppr_AF_106359	aplp1	Aplp1	APLP1
UF_Ppr_AF_116049	aplp2	Aplp2	APLP2
UF_Ppr_AF_102606	apmap	Apmap	APMAP
UF_Ppr_AF_106383	apoa1b	Apoa1	APOA1
UF_Ppr_AF_117594	afp4	Apoa2	APOA2
UF_Ppr_AF_109657	apoa4a	Apoa4	APOA4
UF_Ppr_AF_110120	apobb.2	Apob	APOB
UF_Ppr_AF_118133	apobb.1	Apob	APOB
UF_Ppr_AF_105655	apoc1	Apoc1	APOC1
UF_Ppr_AF_115045	apoc2	Apoc2	APOC2
UF_Ppr_AF_111023	apoeb	Apoe	APOE
UF_Ppr_AF_117197	si:dkey-192d15.2	Apol11a	APOL4
UF_Ppr_AF_115628	si:ch73-233k15.2	Apol7a	APOL3
UF_Ppr_AM_119980	appa	App	APP
UF_Ppr_AF_115502	appa	App	APP
UF_Ppr_AF_110371	appb	App	APP
UF_Ppr_AF_110048	appa	App	APP
UF_Ppr_AF_110829	appbp2	Appbp2	APPBP2
UF_Ppr_AF_103617	aptx	Aptx	APTX
UF_Ppr_AF_106298	aqp1a.1	Aqp1	AQP1
UF_Ppr_AF_104294	aqp10b	Aqp9	AQP9
UF_Ppr_AF_111478	aqr	Aqr	AQR
UF_Ppr_AF_107061	ar	Ar	AR
UF_Ppr_AF_115553	arap3	Arap3	ARAP3
UF_Ppr_AF_110000	arcn1a	Arcn1	ARCN1
UF_Ppr_AF_118251	arcn1b	Arcn1	ARCN1
UF_Ppr_AF_117862	arf2a	Arf1	ARF1
UF_Ppr_AF_111047	arf6b	Arf6	ARF6
UF_Ppr_AF_106505	arfgap1	Arfgap1	ARFGAP1
UF_Ppr_AF_100833	arfgef1	Arfgef1	ARFGEF1
UF_Ppr_AF_105953	arfgef1	Arfgef1	ARFGEF1
UF_Ppr_AM_120498	arfgef1	Arfgef1	ARFGEF1
UF_Ppr_AF_118803	arfgef3	Arfgef3	ARFGEF3
UF_Ppr_AF_100112	arfip1	Arfip1	ARFIP1
UF_Ppr_AF_104180	arg1	Arg1	ARG1
UF_Ppr_AF_109517	arg2	Arg2	ARG2
UF_Ppr_AF_102162	arhgap11a	Arhgap11a	ARHGAP11A
UF_Ppr_AF_106008	zgc:153345	Arhgap11a	ARHGAP11A
UF_Ppr_AF_109504	arhgap12a	Arhgap12	ARHGAP12
UF_Ppr_AF_118940	arhgap17b	Arhgap17	ARHGAP17
UF_Ppr_AF_118620	arhgap19	Arhgap19	ARHGAP19
UF_Ppr_AF_100449	arhgap20	Arhgap20	ARHGAP20
UF_Ppr_AF_117427	arhgap21a	Arhgap21	ARHGAP21
UF_Ppr_AF_117627	arhgap21b	Arhgap21	ARHGAP21
UF_Ppr_AF_107548	si:ch211-247j9.1	Arhgap22	ARHGAP22
UF_Ppr_AF_103500	arhgap23a	Arhgap23	ARHGAP23
UF_Ppr_AF_115659	arhgap27l	Arhgap27	ARHGAP27
UF_Ppr_AF_112045	arhgap27	Arhgap27	ARHGAP27
UF_Ppr_AF_113041	arhgap29b	Arhgap29	ARHGAP29
UF_Ppr_AF_111954	si:dkeyp-68b7.12	Arhgap30	ARHGAP30
UF_Ppr_AF_101006	arhgap31	Arhgap31	ARHGAP31
UF_Ppr_AF_102348	arhgap33	Arhgap33	ARHGAP33
UF_Ppr_AF_111138	arhgap35b	Arhgap35	ARHGAP35
UF_Ppr_AF_117031	arhgap35b	Arhgap35	ARHGAP35
UF_Ppr_AF_118445	arhgap35a	Arhgap35	ARHGAP35
UF_Ppr_AF_101316	zgc:92107	Arhgap39	ARHGAP39
UF_Ppr_AF_112340	zgc:92107	Arhgap39	ARHGAP39
UF_Ppr_AF_117858	arhgap39	Arhgap39	ARHGAP39
UF_Ppr_AF_104667	arhgap4a	Arhgap4	ARHGAP4
UF_Ppr_AF_106866	arhgap44	Arhgap44	ARHGAP44
UF_Ppr_AF_109651	arhgap5	Arhgap5	ARHGAP5
UF_Ppr_AF_102704	ARHGAP6	Arhgap6	ARHGAP6
UF_Ppr_AF_108955	arhgdia	Arhgdia	ARHGDIA
UF_Ppr_AF_107194	arhgef10lb	Arhgef10l	ARHGEF10L
UF_Ppr_AF_114719	plekhg7	Arhgef11	ARHGEF11
UF_Ppr_AF_107462	arhgef12a	Arhgef12	ARHGEF12
UF_Ppr_AF_115717	arhgef12a	Arhgef12	ARHGEF12
UF_Ppr_AF_108615	arhgef12b	Arhgef12	ARHGEF12
UF_Ppr_AF_118961	arhgef18a	Arhgef18	ARHGEF18
UF_Ppr_AF_112279	arhgef19	Arhgef19	ARHGEF19
UF_Ppr_AF_104298	arhgef1a	Arhgef2	ARHGEF2
UF_Ppr_AF_113818	arhgef28a	Arhgef28	ARHGEF28
UF_Ppr_AF_109045	arhgef33	Arhgef33	ARHGEF33
UF_Ppr_AF_106318	arhgef39	Arhgef39	ARHGEF39
UF_Ppr_AF_116677	arhgef4	Arhgef4	ARHGEF4
UF_Ppr_AF_111133	arhgef7b	Arhgef7	ARHGEF7
UF_Ppr_AF_111627	arhgef7b	Arhgef7	ARHGEF7
UF_Ppr_AF_107814	arhgef9a	Arhgef9	ARHGEF9
UF_Ppr_AF_116032	arid1aa	Arid1a	ARID1A
UF_Ppr_AF_114320	arid1aa	Arid1a	ARID1A
UF_Ppr_AF_115017	arid1b	Arid1b	ARID1B
UF_Ppr_AF_107837	arid2	Arid2	ARID2
UF_Ppr_AF_110794	arid2	Arid2	ARID2
UF_Ppr_AF_117876	arid3b	Arid3b	ARID3B
UF_Ppr_AF_104689	arid3b	Arid3b	ARID3B
UF_Ppr_AF_104807	arid3b	Arid3b	ARID3B
UF_Ppr_AF_109689	arid4a	Arid4a	ARID4A
UF_Ppr_AF_110123	arid5b	Arid5b	ARID5B
UF_Ppr_AF_108467	arid5b	Arid5b	ARID5B
UF_Ppr_AF_103716	zgc:77151	Arid5b	ARID5B
UF_Ppr_AF_108116	arih1	Arih1	ARIH1
UF_Ppr_AF_103290	arih1l	Arih1	ARIH1
UF_Ppr_AF_110605	arih1l	Arih1	ARIH1
UF_Ppr_AF_116803	arih2	Arih2	ARIH2
UF_Ppr_AF_115485	arl1	Arl1	ARL1
UF_Ppr_AF_107056	arl4aa	Arl4a	ARL4A
UF_Ppr_AF_117962	arl4cb	Arl4c	ARL4C
UF_Ppr_AF_104671	arl8	Arl5b	ARL5B
UF_Ppr_AF_108718	arl8	Arl5b	ARL5B
UF_Ppr_AF_112419	arl5c	Arl5c	ARL5C
UF_Ppr_AF_117176	arl6	Arl6	ARL6
UF_Ppr_AF_111777	arl8a	Arl8a	ARL8A
UF_Ppr_AF_112400	arl8a	Arl8a	ARL8A
UF_Ppr_AF_113234	arl8ba	Arl8b	ARL8B
UF_Ppr_AF_103526	armc10	Armc10	ARMC10
UF_Ppr_AF_102528	armc2	Armc2	ARMC2
UF_Ppr_AF_104242	armc3	Armc3	ARMC3
UF_Ppr_AF_114650	armc8	Armc8	ARMC8
UF_Ppr_AF_111200	armh1	Armh1	ARMH1
UF_Ppr_AM_120726	armh3	Armh3	ARMH3
UF_Ppr_AF_101199	armh3	Armh3	ARMH3
UF_Ppr_AF_108870	armt1	Armt1	ARMT1
UF_Ppr_AF_115977	arnt	Arnt	ARNT
UF_Ppr_AF_106221	arnt2	Arnt2	ARNT2
UF_Ppr_AF_109267	arnt2	Arnt2	ARNT2
UF_Ppr_AF_103223	arntl1b	Arntl	ARNTL
UF_Ppr_AF_110609	arpc1a	Arpc1a	ARPC1A
UF_Ppr_AF_115816	arpc2	Arpc2	ARPC2
UF_Ppr_AF_103569	arpc3	Arpc3	ARPC3
UF_Ppr_AF_107680	arpc4	Arpc4	ARPC4
UF_Ppr_AF_115903	arpc5b	Arpc5	ARPC5
UF_Ppr_AF_113449	arpc5la	Arpc5l	ARPC5L
UF_Ppr_AF_110880	arpp19b	Arpp19	ARPP19
UF_Ppr_AM_119550	arpp19b	Arpp19	ARPP19
UF_Ppr_AM_119946	arpp21	Arpp21	ARPP21
UF_Ppr_AF_107114	arpp21	Arpp21	ARPP21
UF_Ppr_AF_118135	arrb2b	Arrb2	ARRB2
UF_Ppr_AF_100201	arrdc2	Arrdc2	ARRDC2
UF_Ppr_AF_114813	arrdc3b	Arrdc3	ARRDC3
UF_Ppr_AF_111850	arrdc3a	Arrdc3	ARRDC3
UF_Ppr_AF_103479	arrdc3b	Arrdc3	ARRDC3
UF_Ppr_AF_105987	arsa	Arsa	ARSA
UF_Ppr_AF_108425	si:dkey-174i8.1	Arsi	ARSI
UF_Ppr_AF_107370	arsia	Arsi	ARSI
UF_Ppr_AF_103003	arsk	Arsk	ARSK
UF_Ppr_AF_110342	as3mt	As3mt	AS3MT
UF_Ppr_AF_114398	asap1b	Asap1	ASAP1
UF_Ppr_AF_116433	asap1a	Asap1	ASAP1
UF_Ppr_AF_101836	asap2b	Asap2	ASAP2
UF_Ppr_AF_116957	asap2b	Asap2	ASAP2
UF_Ppr_AF_103491	asap3	Asap3	ASAP3
UF_Ppr_AM_119102	asap3	Asap3	ASAP3
UF_Ppr_AF_104773	asb10	Asb10	ASB10
UF_Ppr_AF_103173	asb12a	Asb12	ASB12
UF_Ppr_AF_113648	asb16	Asb16	ASB16
UF_Ppr_AF_103936	asb2b	Asb2	ASB2
UF_Ppr_AF_114541	asb7	Asb7	ASB7
UF_Ppr_AF_116420	asb8	Asb8	ASB8
UF_Ppr_AF_101401	ascc2	Ascc2	ASCC2
UF_Ppr_AF_118504	ascl1a	Ascl1	ASCL1
UF_Ppr_AF_103849	ash1l	Ash1l	ASH1L
UF_Ppr_AF_108652	asic1a	Asic1	ASIC1
UF_Ppr_AF_102635	asic4a	Asic4	ASIC4
UF_Ppr_AF_116767	asmt	Asmt	ASMT
UF_Ppr_AF_117246	asns	Asns	ASNS
UF_Ppr_AF_112770	unm_hu7910	Asph	ASPH
UF_Ppr_AF_103447	asphd2	Asphd2	ASPHD2
UF_Ppr_AF_101256	aspscr1	Aspscr1	ASPSCR1
UF_Ppr_AF_112867	asrgl1	Asrgl1	ASRGL1
UF_Ppr_AF_109857	ASS1	Ass1	ASS1
UF_Ppr_AF_115874	ASTE1	Aste1	ASTE1
UF_Ppr_AF_112464	astn1	Astn1	ASTN1
UF_Ppr_AF_104692	asz1	Asz1	ASZ1
UF_Ppr_AF_104076	atad5a	Atad5	ATAD5
UF_Ppr_AF_103793	atcayb	Atcay	ATCAY
UF_Ppr_AF_118271	atcaya	Atcay	ATCAY
UF_Ppr_AF_112910	ATE1	Ate1	ATE1
UF_Ppr_AF_101797	atf1	Atf1	ATF1
UF_Ppr_AF_108898	atf3	Atf3	ATF3
UF_Ppr_AF_113056	atf5a	Atf5	ATF5
UF_Ppr_AF_110920	atf5b	Atf5	ATF5
UF_Ppr_AF_117311	atf6	Atf6	ATF6
UF_Ppr_AF_107450	atf7b	Atf7	ATF7
UF_Ppr_AF_111546	atf7b	Atf7	ATF7
UF_Ppr_AF_102532	atf7ip	Atf7ip	ATF7IP
UF_Ppr_AF_111411	atg13	Atg13	ATG13
UF_Ppr_AF_115446	atg16l1	Atg16l1	ATG16L1
UF_Ppr_AF_118824	atg3	Atg3	ATG3
UF_Ppr_AF_100440	atg4db	Atg4d	ATG4D
UF_Ppr_AF_101489	atg4da	Atg4d	ATG4D
UF_Ppr_AF_107413	atg5	Atg5	ATG5
UF_Ppr_AM_119407	atg7	Atg7	ATG7
UF_Ppr_AF_101386	atg9b	Atg9b	ATG9B
UF_Ppr_AF_109695	atic	Atic	ATIC
UF_Ppr_AF_113422	atl1	Atl1	ATL1
UF_Ppr_AF_104708	atl3	Atl3	ATL3
UF_Ppr_AF_112508	atmin	Atmin	ATMIN
UF_Ppr_AF_103160	atn1	Atn1	ATN1
UF_Ppr_AF_105642	atox1	Atox1	ATOX1
UF_Ppr_AF_109646	atp10a	Atp10a	ATP10A
UF_Ppr_AF_111648	atp10d	Atp10d	ATP10D
UF_Ppr_AF_109811	ATP11B	Atp11b	ATP11B
UF_Ppr_AF_118512	CU137686.1	Atp11b	ATP11B
UF_Ppr_AF_102817	atp11c	Atp11c	ATP11C
UF_Ppr_AF_113962	atp13a1	Atp13a1	ATP13A1
UF_Ppr_AF_106647	atp13a2	Atp13a2	ATP13A2
UF_Ppr_AF_107122	atp1a1a.2	Atp1a1	ATP1A1
UF_Ppr_AF_114889	atp1a2a	Atp1a2	ATP1A2
UF_Ppr_AF_110643	atp1a3b	Atp1a3	ATP1A3
UF_Ppr_AF_110200	atp1a3a	Atp1a3	ATP1A3
UF_Ppr_AF_105701	atp1b1a	Atp1b1	ATP1B1
UF_Ppr_AM_120281	atp1b2a	Atp1b2	ATP1B2
UF_Ppr_AF_108470	atp1b2a	Atp1b2	ATP1B2
UF_Ppr_AF_117087	atp1b3b	Atp1b3	ATP1B3
UF_Ppr_AF_115294	atp1b4	Atp1b4	ATP1B4
UF_Ppr_AM_119157	atp1b4	Atp1b4	ATP1B4
UF_Ppr_AF_104135	atp2a2b	Atp2a2	ATP2A2
UF_Ppr_AF_105864	atp2b1b	Atp2b1	ATP2B1
UF_Ppr_AF_107711	atp2b1a	Atp2b1	ATP2B1
UF_Ppr_AF_115984	atp2b2	Atp2b2	ATP2B2
UF_Ppr_AF_105978	atp2b2	Atp2b2	ATP2B2
UF_Ppr_AF_110719	atp2b4	Atp2b4	ATP2B4
UF_Ppr_AM_119401	atp2b4	Atp2b4	ATP2B4
UF_Ppr_AF_104038	atp2c1	Atp2c1	ATP2C1
UF_Ppr_AF_107699	atp5fa1	Atp5a1	ATP5F1A
UF_Ppr_AF_111099	atp5f1b	Atp5b	ATP5F1B
UF_Ppr_AF_107692	atp5f1d	Atp5d	ATP5F1D
UF_Ppr_AF_107983	atp5f1e	Atp5e	ATP5F1E
UF_Ppr_AF_116760	atp5mc1	Atp5g1	ATP5MC1
UF_Ppr_AF_104657	atp5mc3b	Atp5g3	ATP5MC3
UF_Ppr_AF_103806	atp5pd	Atp5h	ATP5PD
UF_Ppr_AF_107844	si:ch211-140m22.7	Atp5j	ATP5PF
UF_Ppr_AF_106934	atp5mf	Atp5j2	ATP5MF
UF_Ppr_AF_118428	atp5mea	Atp5k	ATP5ME
UF_Ppr_AF_106033	atp5l	Atp5l	ATP5MG
UF_Ppr_AF_116955	atp6ap1la	Atp6ap1l	ATP6AP1L
UF_Ppr_AF_106260	atp6ap2	Atp6ap2	ATP6AP2
UF_Ppr_AF_113734	atp6v0a2b	Atp6v0a2	ATP6V0A2
UF_Ppr_AF_114801	atp6v0a2a	Atp6v0a2	ATP6V0A2
UF_Ppr_AF_114573	atp6v0b	Atp6v0b	ATP6V0B
UF_Ppr_AF_110620	atp6v0cb	Atp6v0c	ATP6V0C
UF_Ppr_AF_114834	atp6v0d1	Atp6v0d1	ATP6V0D1
UF_Ppr_AF_112386	atp6v1aa	Atp6v1a	ATP6V1A
UF_Ppr_AF_103580	atp6v1aa	Atp6v1a	ATP6V1A
UF_Ppr_AF_102550	atp6v1ba	Atp6v1b2	ATP6V1B2
UF_Ppr_AF_115265	atp6v1c1b	Atp6v1c1	ATP6V1C1
UF_Ppr_AF_100442	atp6v1c1a	Atp6v1c1	ATP6V1C1
UF_Ppr_AF_118175	atp6v1e1b	Atp6v1e1	ATP6V1E1
UF_Ppr_AF_111894	atp6v1g1	Atp6v1g1	ATP6V1G1
UF_Ppr_AF_110373	atp7a	Atp7a	ATP7A
UF_Ppr_AF_110676	atp8b1	Atp8b1	ATP8B1
UF_Ppr_AF_115968	atp8b4	Atp8b4	ATP8B4
UF_Ppr_AF_106191	atp8b4	Atp8b4	ATP8B4
UF_Ppr_AF_117893	ATP9A	Atp9a	ATP9A
UF_Ppr_AF_108810	ATP9A	Atp9a	ATP9A
UF_Ppr_AF_107601	ATP9A	Atp9a	ATP9A
UF_Ppr_AF_110914	atpaf2	Atpaf2	ATPAF2
UF_Ppr_AF_117159	atr	Atr	ATR
UF_Ppr_AF_112232	atrip	Atrip	ATRIP
UF_Ppr_AF_106094	atrn	Atrn	ATRN
UF_Ppr_AF_103626	atrnl1b	Atrnl1	ATRNL1
UF_Ppr_AF_112218	atrnl1b	Atrnl1	ATRNL1
UF_Ppr_AF_104176	atrx	Atrx	ATRX
UF_Ppr_AF_101764	atxn1b	Atxn1	ATXN1
UF_Ppr_AF_111383	atxn1b	Atxn1	ATXN1
UF_Ppr_AF_106732	atxn1l	Atxn1l	ATXN1L
UF_Ppr_AF_108057	atxn7	Atxn7	ATXN7
UF_Ppr_AF_111229	atxn7	Atxn7	ATXN7
UF_Ppr_AF_115453	atxn7l2b	Atxn7l2	ATXN7L2
UF_Ppr_AF_103646	atxn7l2a	Atxn7l2	ATXN7L2
UF_Ppr_AF_100491	si:dkeyp-118b1.2	Atxn7l3	ATXN7L3
UF_Ppr_AF_113441	atxn7l3	Atxn7l3	ATXN7L3
UF_Ppr_AF_103731	zgc:175280	AU018091	SLC7A3
UF_Ppr_AF_116340	zgc:101569	Auh	AUH
UF_Ppr_AF_113544	aup1	Aup1	AUP1
UF_Ppr_AF_113243	avpr1ab	Avpr1a	AVPR1A
UF_Ppr_AF_113656	zgc:162344	AW554918	KIAA1328
UF_Ppr_AF_100939	axdnd1	Axdnd1	AXDND1
UF_Ppr_AF_101116	axin1	Axin1	AXIN1
UF_Ppr_AF_110139	axin2	Axin2	AXIN2
UF_Ppr_AF_101884	azin1b	Azin1	AZIN1
UF_Ppr_AF_105866	b3galt2	B3galt2	B3GALT2
UF_Ppr_AF_102582	b3galt6	B3galt6	B3GALT6
UF_Ppr_AF_116738	b3glcta	B3glct	B3GLCT
UF_Ppr_AF_108328	b3gnt2b	B3gnt2	B3GNT2
UF_Ppr_AF_112852	b3gnt3.4	B3gnt3	B3GNT3
UF_Ppr_AF_101453	b3gnt5b	B3gnt5	B3GNT5
UF_Ppr_AF_105080	b3gnt7	B3gnt7	B3GNT7
UF_Ppr_AF_115304	b3gntl1	B3gntl1	B3GNTL1
UF_Ppr_AF_112525	b4galnt1b	B4galnt1	B4GALNT1
UF_Ppr_AF_109828	b4galnt1a	B4galnt1	B4GALNT1
UF_Ppr_AF_100340	si:dkey-199f5.8	B4galt2	B4GALT2
UF_Ppr_AF_109782	b4galt2	B4galt2	B4GALT2
UF_Ppr_AF_110700	b4galt3	B4galt3	B4GALT3
UF_Ppr_AF_101062	b4galt4	B4galt4	B4GALT4
UF_Ppr_AF_100888	b4galt6	B4galt6	B4GALT6
UF_Ppr_AF_108231	b4galt6	B4galt6	B4GALT6
UF_Ppr_AM_120497	b4galt6	B4galt6	B4GALT6
UF_Ppr_AF_116378	b4gat1	B4gat1	B4GAT1
UF_Ppr_AF_112344	bace2	Bace2	BACE2
UF_Ppr_AF_105074	bag3	Bag3	BAG3
UF_Ppr_AF_114920	bag4	Bag4	BAG4
UF_Ppr_AF_118715	bag5	Bag5	BAG5
UF_Ppr_AF_101983	bag6l	Bag6	BAG6
UF_Ppr_AF_113852	baiap2a	Baiap2	BAIAP2
UF_Ppr_AF_117791	baiap2a	Baiap2	BAIAP2
UF_Ppr_AF_107701	baiap2l1a	Baiap2l1	BAIAP2L1
UF_Ppr_AF_100108	bambia	Bambi	BAMBI
UF_Ppr_AF_118297	bap1	Bap1	BAP1
UF_Ppr_AF_109092	bap1	Bap1	BAP1
UF_Ppr_AF_100855	basp1	Basp1	BASP1
UF_Ppr_AF_117082	basp1	Basp1	BASP1
UF_Ppr_AF_100425	batf	Batf	BATF
UF_Ppr_AF_117173	baz1a	Baz1a	BAZ1A
UF_Ppr_AF_105279	baz1b	Baz1b	BAZ1B
UF_Ppr_AF_104424	baz2a	Baz2a	BAZ2A
UF_Ppr_AF_113636	baz2ba	Baz2b	BAZ2B
UF_Ppr_AF_110980	bbox1	Bbox1	BBOX1
UF_Ppr_AF_114139	bbs2	Bbs2	BBS2
UF_Ppr_AF_106332	bbs7	Bbs7	BBS7
UF_Ppr_AF_117028	bbx	Bbx	BBX
UF_Ppr_AF_115466	zgc:111986	BC005537	C6orf62
UF_Ppr_AF_101379	si:ch211-239j9.1	BC029722	MMP24OS
UF_Ppr_AF_102030	si:dkey-121a11.3	BC034090	KIAA1614
UF_Ppr_AF_111160	fc44g01	BC055324	C1orf112
UF_Ppr_AF_111887	bcan	Bcan	BCAN
UF_Ppr_AF_111158	bcar1	Bcar1	BCAR1
UF_Ppr_AF_114702	bcar3	Bcar3	BCAR3
UF_Ppr_AF_106401	bcas3	Bcas3	BCAS3
UF_Ppr_AF_100584	bcat2	Bcat2	BCAT2
UF_Ppr_AF_113702	bcdin3d	Bcdin3d	BCDIN3D
UF_Ppr_AF_113457	bckdha	Bckdha	BCKDHA
UF_Ppr_AF_104885	bckdk	Bckdk	BCKDK
UF_Ppr_AF_106114	bcl10	Bcl10	BCL10
UF_Ppr_AF_103432	bcl11aa	Bcl11a	BCL11A
UF_Ppr_AF_111466	bcl11ba	Bcl11b	BCL11B
UF_Ppr_AF_115954	bcl2l13	Bcl2l13	BCL2L13
UF_Ppr_AF_116381	bcl6ab	Bcl6b	BCL6B
UF_Ppr_AF_111901	bcl6b	Bcl6b	BCL6B
UF_Ppr_AF_104491	bcl6ab	Bcl6b	BCL6B
UF_Ppr_AF_110113	bcl7ba	Bcl7b	BCL7B
UF_Ppr_AF_112679	bcl9	Bcl9	BCL9
UF_Ppr_AF_103576	bcl9	Bcl9	BCL9
UF_Ppr_AM_120303	bcl9	Bcl9	BCL9
UF_Ppr_AF_110608	bco2a	Bco2	BCO2
UF_Ppr_AF_118638	si:ch73-366l1.5	Bcorl1	BCORL1
UF_Ppr_AF_117156	bcs1l	Bcs1l	BCS1L
UF_Ppr_AF_105164	bdh1	Bdh1	BDH1
UF_Ppr_AF_110483	bdnf	Bdnf	BDNF
UF_Ppr_AF_115171	si:dkey-174m14.3	Begain	BEGAIN
UF_Ppr_AF_105384	bend3	Bend3	BEND3
UF_Ppr_AF_118065	bend3	Bend3	BEND3
UF_Ppr_AF_112330	si:ch211-220f12.4	Bend7	BEND7
UF_Ppr_AF_118894	bet1l	Bet1l	BET1L
UF_Ppr_AF_113231	bhlhe22	Bhlhe22	BHLHE22
UF_Ppr_AF_101148	bhlhe22	Bhlhe22	BHLHE22
UF_Ppr_AF_111701	bhlhe23	Bhlhe23	BHLHE23
UF_Ppr_AF_111449	bhlhe40	Bhlhe40	BHLHE40
UF_Ppr_AF_113789	bhlhe41	Bhlhe41	BHLHE41
UF_Ppr_AF_105526	bhlhe41	Bhlhe41	BHLHE41
UF_Ppr_AF_101901	bhlhe41	Bhlhe41	BHLHE41
UF_Ppr_AF_113657	bicc2	Bicc1	BICC1
UF_Ppr_AF_107978	zgc:162200	Bicd2	BICD2
UF_Ppr_AF_113757	bicdl2	Bicdl2	BICDL2
UF_Ppr_AF_114377	bicra	Bicra	BICRA
UF_Ppr_AF_107585	bik	Bik	BIK
UF_Ppr_AF_105651	birc5b	Birc5	BIRC5
UF_Ppr_AF_118015	birc6	Birc6	BIRC6
UF_Ppr_AF_108566	blm	Blm	BLM
UF_Ppr_AF_102125	blmh	Blmh	BLMH
UF_Ppr_AF_113850	si:dkeyp-117b11.1	Blnk	BLNK
UF_Ppr_AF_112100	blnk	Blnk	BLNK
UF_Ppr_AF_108755	bloc1s4	Bloc1s4	BLOC1S4
UF_Ppr_AF_110690	blvra	Blvra	BLVRA
UF_Ppr_AF_108151	bmf2	Bmf	BMF
UF_Ppr_AF_108162	bmp1a	Bmp1	BMP1
UF_Ppr_AM_119840	bmp1a	Bmp1	BMP1
UF_Ppr_AF_101186	bmp1a	Bmp1	BMP1
UF_Ppr_AF_115567	bmp2a	Bmp2	BMP2
UF_Ppr_AF_105124	bmp2k	Bmp2k	BMP2K
UF_Ppr_AF_105098	bmp2k	Bmp2k	BMP2K
UF_Ppr_AF_107118	bmp16	Bmp4	BMP4
UF_Ppr_AF_109672	bmp4	Bmp4	BMP4
UF_Ppr_AF_100303	bmpr1ba	Bmpr1b	BMPR1B
UF_Ppr_AF_108534	bms1	Bms1	BMS1
UF_Ppr_AF_107245	bmt2	Bmt2	BMT2
UF_Ppr_AF_105635	bnc2	Bnc2	BNC2
UF_Ppr_AF_111447	bnip3la	Bnip3l	BNIP3L
UF_Ppr_AF_104244	boc	Boc	BOC
UF_Ppr_AF_111836	boc	Boc	BOC
UF_Ppr_AF_110926	boka	Bok	BOK
UF_Ppr_AF_112676	bora	Bora	BORA
UF_Ppr_AF_113170	borcs5	Borcs5	BORCS5
UF_Ppr_AF_117516	si:dkey-72l14.4	Borcs6	BORCS6
UF_Ppr_AF_109648	bpgm	Bpgm	BPGM
UF_Ppr_AF_100153	bptf	Bptf	BPTF
UF_Ppr_AF_110140	brap	Brap	BRAP
UF_Ppr_AF_110380	brat1	Brat1	BRAT1
UF_Ppr_AF_115651	brd2a	Brd2	BRD2
UF_Ppr_AM_120245	brd3b	Brd3	BRD3
UF_Ppr_AF_106325	brd3a	Brd3	BRD3
UF_Ppr_AF_109399	brd4	Brd4	BRD4
UF_Ppr_AF_101480	brd8	Brd8	BRD8
UF_Ppr_AF_101932	brdt	Brdt	BRDT
UF_Ppr_AF_105415	brf1a	Brf1	BRF1
UF_Ppr_AF_115870	brinp1	Brinp1	BRINP1
UF_Ppr_AF_109659	brinp2	Brinp2	BRINP2
UF_Ppr_AF_116462	brinp3a.1	Brinp2	BRINP2
UF_Ppr_AF_102720	brms1	Brms1	BRMS1
UF_Ppr_AF_113386	brms1la	Brms1l	BRMS1L
UF_Ppr_AF_103780	brox	Brox	BROX
UF_Ppr_AF_100567	brox	Brox	BROX
UF_Ppr_AF_112691	brpf1	Brpf1	BRPF1
UF_Ppr_AF_100354	brpf3a	Brpf3	BRPF3
UF_Ppr_AF_118993	brsk2b	Brsk2	BRSK2
UF_Ppr_AF_109115	brwd1	Brwd1	BRWD1
UF_Ppr_AF_106778	bscl2	Bscl2	BSCL2
UF_Ppr_AF_114057	bsdc1	Bsdc1	BSDC1
UF_Ppr_AF_107979	bsg	Bsg	BSG
UF_Ppr_AF_102218	bsnb	Bsn	BSN
UF_Ppr_AF_117974	btaf1	Btaf1	BTAF1
UF_Ppr_AF_101345	btbd11b	Btbd11	BTBD11
UF_Ppr_AF_103961	btbd2a	Btbd2	BTBD2
UF_Ppr_AF_113637	btbd2a	Btbd2	BTBD2
UF_Ppr_AM_119496	btbd2a	Btbd2	BTBD2
UF_Ppr_AF_109960	btbd3b	Btbd3	BTBD3
UF_Ppr_AF_103520	btbd6b	Btbd6	BTBD6
UF_Ppr_AF_107443	btbd7	Btbd7	BTBD7
UF_Ppr_AF_102048	si:ch73-389b16.2	Btbd8	BTBD8
UF_Ppr_AF_114289	btc	Btc	BTC
UF_Ppr_AF_102717	btf3	Btf3	BTF3
UF_Ppr_AF_113929	btg1	Btg1	BTG1
UF_Ppr_AF_108675	btg3	Btg3	BTG3
UF_Ppr_AF_106102	btg4	Btg4	BTG4
UF_Ppr_AF_118636	btk	Btk	BTK
UF_Ppr_AF_104355	si:ch211-278p9.2	Btn1a1	BTN1A1
UF_Ppr_AF_106091	bud31	Bud31	BUD31
UF_Ppr_AF_118651	bves	Bves	BVES
UF_Ppr_AF_101978	bzw1a	Bzw1	BZW1
UF_Ppr_AF_111169	c1d	C1d	C1D
UF_Ppr_AF_109116	c1galt1a	C1galt1	C1GALT1
UF_Ppr_AF_106194	c1qbp	C1qbp	C1QBP
UF_Ppr_AF_115057	c1qc	C1qc	C1QC
UF_Ppr_AM_120721	cbln7	C1ql4	C1QL4
UF_Ppr_AF_112740	c1qtnf1	C1qtnf1	C1QTNF1
UF_Ppr_AF_113594	c2cd2l	C2cd2l	C2CD2L
UF_Ppr_AF_119060	c2cd4a	C2cd4d	C2CD4D
UF_Ppr_AF_116619	c2cd5	C2cd5	C2CD5
UF_Ppr_AF_114707	c3a.1	C3	C3
UF_Ppr_AF_102144	c4b	C4b	C4B
UF_Ppr_AF_100573	c6	C6	C6
UF_Ppr_AF_107864	cab39l	Cab39l	CAB39L
UF_Ppr_AF_111598	cabin1	Cabin1	CABIN1
UF_Ppr_AF_100145	cables1	Cables1	CABLES1
UF_Ppr_AF_115528	cables2a	Cables2	CABLES2
UF_Ppr_AF_100296	cabp1a	Cabp1	CABP1
UF_Ppr_AF_106851	cabp2b	Cabp2	CABP2
UF_Ppr_AF_105641	cachd1	Cachd1	CACHD1
UF_Ppr_AF_111977	cacna1ab	Cacna1a	CACNA1A
UF_Ppr_AF_107185	cacna1ab	Cacna1a	CACNA1A
UF_Ppr_AF_107635	cacna1ba	Cacna1b	CACNA1B
UF_Ppr_AF_113884	cacna1c	Cacna1c	CACNA1C
UF_Ppr_AF_111788	cacna1fb	Cacna1f	CACNA1F
UF_Ppr_AF_104779	cacna1g	Cacna1g	CACNA1G
UF_Ppr_AF_113709	cacna1hb	Cacna1h	CACNA1H
UF_Ppr_AF_111553	cacna2d2b	Cacna2d2	CACNA2D2
UF_Ppr_AF_107906	cacna2d3	Cacna2d3	CACNA2D3
UF_Ppr_AF_110618	cacna2d3	Cacna2d3	CACNA2D3
UF_Ppr_AF_101558	cacnb1	Cacnb1	CACNB1
UF_Ppr_AF_105069	cacnb2a	Cacnb2	CACNB2
UF_Ppr_AF_107509	cacng2a	Cacng2	CACNG2
UF_Ppr_AF_104976	cacng7a	Cacng7	CACNG7
UF_Ppr_AF_105936	cactin	Cactin	CACTIN
UF_Ppr_AF_110911	cacul1	Cacul1	CACUL1
UF_Ppr_AF_118915	cad	Cad	CAD
UF_Ppr_AF_114714	cadm2b	Cadm2	CADM2
UF_Ppr_AF_102087	cadm3	Cadm3	CADM3
UF_Ppr_AF_113697	cadm4	Cadm4	CADM4
UF_Ppr_AF_109926	cadpsb	Cadps	CADPS
UF_Ppr_AF_105026	cadps2	Cadps2	CADPS2
UF_Ppr_AF_115755	cadps2	Cadps2	CADPS2
UF_Ppr_AF_103513	calb1	Calb1	CALB1
UF_Ppr_AF_115155	calb2b	Calb2	CALB2
UF_Ppr_AF_105613	calcoco1a	Calcoco1	CALCOCO1
UF_Ppr_AF_108989	calhm2.2	Calhm2	CALHM2
UF_Ppr_AF_110848	calm3a	Calm2	CALM2
UF_Ppr_AF_117432	calm3a	Calm2	CALM2
UF_Ppr_AM_120488	calm3a	Calm2	CALM2
UF_Ppr_AF_111521	caln1	Caln1	CALN1
UF_Ppr_AF_100147	calr	Calr	CALR
UF_Ppr_AF_104247	camk1b	Camk1	CAMK1
UF_Ppr_AF_102398	camk1db	Camk1d	CAMK1D
UF_Ppr_AF_106156	camk2g1	Camk2g	CAMK2G
UF_Ppr_AF_101425	camkvl	Camk2g	CAMK2G
UF_Ppr_AF_111146	camk2g1	Camk2g	CAMK2G
UF_Ppr_AF_107369	camk2n2	Camk2n2	CAMK2N2
UF_Ppr_AF_118246	camk2n1a	Camk2n2	CAMK2N2
UF_Ppr_AF_114030	CAMK2N1	Camk2n2	CAMK2N2
UF_Ppr_AF_109616	camkva	Camkv	CAMKV
UF_Ppr_AF_102070	camsap1a	Camsap1	CAMSAP1
UF_Ppr_AF_105261	camsap1b	Camsap1	CAMSAP1
UF_Ppr_AM_119353	camsap1b	Camsap1	CAMSAP1
UF_Ppr_AF_101468	camsap2a	Camsap2	CAMSAP2
UF_Ppr_AF_101501	camsap3	Camsap3	CAMSAP3
UF_Ppr_AF_116236	CAMSAP3	Camsap3	CAMSAP3
UF_Ppr_AM_120273	camta1a	Camta1	CAMTA1
UF_Ppr_AF_114507	cand2	Cand2	CAND2
UF_Ppr_AF_103086	cant1b	Cant1	CANT1
UF_Ppr_AF_107652	canx	Canx	CANX
UF_Ppr_AF_104463	cap2	Cap2	CAP2
UF_Ppr_AF_109739	capgb	Capg	CAPG
UF_Ppr_AF_107141	zgc:85932	Capn1	CAPN1
UF_Ppr_AF_111201	capn10	Capn10	CAPN10
UF_Ppr_AF_115626	capn12	Capn12	CAPN12
UF_Ppr_AF_100580	capn15	Capn15	CAPN15
UF_Ppr_AF_103091	capn2b	Capn2	CAPN2
UF_Ppr_AF_117142	capn3a	Capn3	CAPN3
UF_Ppr_AF_113743	capn5a	Capn5	CAPN5
UF_Ppr_AF_100917	caprin1b	Caprin1	CAPRIN1
UF_Ppr_AF_112329	caps2	Caps2	CAPS2
UF_Ppr_AF_114389	capza1b	Capza1	CAPZA1
UF_Ppr_AF_104275	capza1b	Capza1	CAPZA1
UF_Ppr_AF_113382	capza1b	Capza1	CAPZA1
UF_Ppr_AF_113502	ca10b	Car10	CA10
UF_Ppr_AF_118843	ca10a	Car10	CA10
UF_Ppr_AF_111877	ca12	Car12	CA12
UF_Ppr_AF_118782	ca4c	Car4	CA4
UF_Ppr_AF_112077	ca4a	Car4	CA4
UF_Ppr_AF_115846	ca5a	Car5b	CA5B
UF_Ppr_AF_114556	ca7	Car7	CA7
UF_Ppr_AF_111528	card9	Card9	CARD9
UF_Ppr_AF_103978	carf	Carf	CARF
UF_Ppr_AF_114113	carmil2	Carmil2	CARMIL2
UF_Ppr_AF_110601	carmil3	Carmil3	CARMIL3
UF_Ppr_AF_117477	carnmt1	Carnmt1	CARNMT1
UF_Ppr_AF_102598	cars2	Cars2	CARS2
UF_Ppr_AF_116151	casc1	Casc1	DNAI7
UF_Ppr_AF_111554	casc3	Casc3	CASC3
UF_Ppr_AF_105375	casd1	Casd1	CASD1
UF_Ppr_AF_114524	caskin1	Caskin1	CASKIN1
UF_Ppr_AF_100642	CASKIN2	Caskin2	CASKIN2
UF_Ppr_AF_112653	casp2	Casp2	CASP2
UF_Ppr_AF_101025	casp3a	Casp3	CASP3
UF_Ppr_AF_103575	casp6a	Casp6	CASP6
UF_Ppr_AF_103846	casp10	Casp8	CASP8
UF_Ppr_AF_107973	casq1a	Casq1	CASQ1
UF_Ppr_AF_105023	casq2	Casq2	CASQ2
UF_Ppr_AF_104558	cast	Cast	CAST
UF_Ppr_AM_119953	castor2	Castor2	CASTOR2
UF_Ppr_AF_103302	cat	Cat	CAT
UF_Ppr_AF_103604	cavin2a	Cavin2	CAVIN2
UF_Ppr_AF_111064	cavin2b	Cavin2	CAVIN2
UF_Ppr_AF_110539	cbarpb	Cbarp	CBARP
UF_Ppr_AF_101002	cbfa2t2	Cbfa2t2	CBFA2T2
UF_Ppr_AF_104000	cbfb	Cbfb	CBFB
UF_Ppr_AF_101380	cbl	Cbl	CBL
UF_Ppr_AF_103243	cblb	Cblb	CBLB
UF_Ppr_AF_110435	cblc	Cblc	CBLC
UF_Ppr_AF_108485	tcnba	Cblif	CBLIF
UF_Ppr_AF_113279	cbll1	Cbll1	CBLL1
UF_Ppr_AF_114501	cbln2b	Cbln2	CBLN2
UF_Ppr_AF_109187	cbsb	Cbs	CBS
UF_Ppr_AF_100426	cbsb	Cbs	CBS
UF_Ppr_AF_117014	cbx1a	Cbx1	CBX1
UF_Ppr_AF_117110	cbx1a	Cbx1	CBX1
UF_Ppr_AF_116984	cbx2	Cbx2	CBX2
UF_Ppr_AF_100478	cbx4	Cbx4	CBX4
UF_Ppr_AF_116326	cbx5	Cbx5	CBX5
UF_Ppr_AF_103752	cbx7a	Cbx7	CBX7
UF_Ppr_AF_113336	cbx8a	Cbx8	CBX8
UF_Ppr_AF_103051	cby1	Cby1	CBY1
UF_Ppr_AF_101061	cc2d1a	Cc2d1a	CC2D1A
UF_Ppr_AF_102306	cc2d1b	Cc2d1b	CC2D1B
UF_Ppr_AF_103444	cc2d2a	Cc2d2a	CC2D2A
UF_Ppr_AF_105423	ccar1	Ccar1	CCAR1
UF_Ppr_AF_115323	ccdc102a	Ccdc102a	CCDC102A
UF_Ppr_AF_110326	zgc:174877	Ccdc106	CCDC106
UF_Ppr_AF_108312	si:ch211-102c2.7	Ccdc117	CCDC117
UF_Ppr_AF_108586	ccdc120	Ccdc120	CCDC120
UF_Ppr_AF_104400	ccdc125	Ccdc125	CCDC125
UF_Ppr_AF_110606	ccdc126	Ccdc126	CCDC126
UF_Ppr_AF_110713	ccdc14	Ccdc14	CCDC14
UF_Ppr_AF_111539	ccdc141	Ccdc141	CCDC141
UF_Ppr_AM_119816	ccdc167	Ccdc167	CCDC167
UF_Ppr_AF_100116	ccdc17	Ccdc17	CCDC17
UF_Ppr_AF_113501	ccdc171	Ccdc171	CCDC171
UF_Ppr_AF_118305	ccdc186	Ccdc186	CCDC186
UF_Ppr_AF_117251	ccdc25	Ccdc25	CCDC25
UF_Ppr_AF_109845	si:dkey-264d12.5	Ccdc30	CCDC30
UF_Ppr_AF_107102	ccdc30	Ccdc30	CCDC30
UF_Ppr_AF_116290	si:dkey-264d12.5	Ccdc30	CCDC30
UF_Ppr_AF_102013	CCDC39	Ccdc39	CCDC39
UF_Ppr_AF_116623	ccdc47	Ccdc47	CCDC47
UF_Ppr_AF_114464	ccdc50	Ccdc50	CCDC50
UF_Ppr_AF_108060	ccdc6a	Ccdc6	CCDC6
UF_Ppr_AF_102684	si:dkeyp-87e7.4	Ccdc71	CCDC71
UF_Ppr_AF_118161	si:dkeyp-87e7.4	Ccdc71	CCDC71
UF_Ppr_AF_111431	si:ch211-222n4.2	Ccdc74a	CCDC74B
UF_Ppr_AF_103892	ccdc82	Ccdc82	CCDC82
UF_Ppr_AF_101164	ccdc85al	Ccdc85a	CCDC85A
UF_Ppr_AF_102454	ccdc87	Ccdc87	CCDC87
UF_Ppr_AF_111823	ccdc88c	Ccdc88c	CCDC88C
UF_Ppr_AM_119792	ccdc88c	Ccdc88c	CCDC88C
UF_Ppr_AF_104556	ccdc9	Ccdc9	CCDC9
UF_Ppr_AF_115243	ccdc92	Ccdc92	CCDC92
UF_Ppr_AF_114208	ccdc92	Ccdc92	CCDC92
UF_Ppr_AF_110153	cckb	Cck	CCK
UF_Ppr_AF_107342	ccl25b	Ccl21b	CCL21
UF_Ppr_AF_113998	ccm2	Ccm2	CCM2
UF_Ppr_AF_102083	ccn1	Ccn1	CCN1
UF_Ppr_AF_116076	ccn2a	Ccn2	CCN2
UF_Ppr_AF_104376	ccna1	Ccna1	CCNA1
UF_Ppr_AF_103878	ccnb3	Ccnb3	CCNB3
UF_Ppr_AM_119575	ccnc	Ccnc	CCNC
UF_Ppr_AF_118260	ccnc	Ccnc	CCNC
UF_Ppr_AF_106871	ccnc	Ccnc	CCNC
UF_Ppr_AF_114468	ccnd1	Ccnd1	CCND1
UF_Ppr_AF_112291	ccnd1	Ccnd1	CCND1
UF_Ppr_AF_109870	ccne1	Ccne1	CCNE1
UF_Ppr_AF_117843	ccne2	Ccne2	CCNE2
UF_Ppr_AF_116609	ccng1	Ccng1	CCNG1
UF_Ppr_AF_101957	ccng2	Ccng2	CCNG2
UF_Ppr_AF_117783	ccni	Ccni	CCNI
UF_Ppr_AF_112671	ccnk	Ccnk	CCNK
UF_Ppr_AF_117237	ccnk	Ccnk	CCNK
UF_Ppr_AF_102829	ccnl1a	Ccnl1	CCNL1
UF_Ppr_AF_106544	ccnt1	Ccnt1	CCNT1
UF_Ppr_AF_117824	ccnt2b	Ccnt2	CCNT2
UF_Ppr_AF_106743	ccnt2b	Ccnt2	CCNT2
UF_Ppr_AF_112132	ccnyl1	Ccnyl1	CCNYL1
UF_Ppr_AF_112015	ccsapb	Ccsap	CCSAP
UF_Ppr_AF_111136	ccser2a	Ccser2	CCSER2
UF_Ppr_AF_107583	cct3	Cct3	CCT3
UF_Ppr_AF_102812	cct4	Cct4	CCT4
UF_Ppr_AF_102616	cct5	Cct5	CCT5
UF_Ppr_AF_117011	cct7	Cct7	CCT7
UF_Ppr_AF_113409	cct8	Cct8	CCT8
UF_Ppr_AF_109449	zmp:0000000937	Cd209c	CD209
UF_Ppr_AF_101274	cd248b	Cd248	CD248
UF_Ppr_AF_117113	cd2bp2	Cd2bp2	CD2BP2
UF_Ppr_AF_105142	pho	Cd3eap	POLR1G
UF_Ppr_AF_117807	cd3eap	Cd3eap	POLR1G
UF_Ppr_AM_119803	cd3eap	Cd3eap	POLR1G
UF_Ppr_AF_101521	cd4-1	Cd4	CD4
UF_Ppr_AF_108130	cd59	Cd59b	CD59
UF_Ppr_AF_110894	cd63	Cd63	CD63
UF_Ppr_AF_103427	si:ch211-212k18.7	Cd68	CD68
UF_Ppr_AF_115069	cd81a	Cd81	CD81
UF_Ppr_AF_100783	cd82b	Cd82	CD82
UF_Ppr_AF_114300	cd82a	Cd82	CD82
UF_Ppr_AF_100795	cd9b	Cd9	CD9
UF_Ppr_AF_105158	cd9a	Cd9	CD9
UF_Ppr_AF_112223	cd99l2	Cd99l2	CD99L2
UF_Ppr_AM_120150	cdab	Cda	CDA
UF_Ppr_AF_114145	cdab	Cda	CDA
UF_Ppr_AF_114048	zgc:103586	Cda	CDA
UF_Ppr_AF_104760	cdan1	Cdan1	CDAN1
UF_Ppr_AM_120511	cdc14aa	Cdc14a	CDC14A
UF_Ppr_AF_104092	cdc16	Cdc16	CDC16
UF_Ppr_AF_109535	cdc23	Cdc23	CDC23
UF_Ppr_AF_107383	cdc25b	Cdc25a	CDC25A
UF_Ppr_AF_104895	cdc26	Cdc26	CDC26
UF_Ppr_AF_115117	cdc27	Cdc27	CDC27
UF_Ppr_AF_112234	cdc27	Cdc27	CDC27
UF_Ppr_AF_105828	cdc34b	Cdc34	CDC34
UF_Ppr_AF_117871	cdc34b	Cdc34	CDC34
UF_Ppr_AF_105271	cdc42	Cdc42	CDC42
UF_Ppr_AF_114007	cdc42l	Cdc42	CDC42
UF_Ppr_AF_104087	cdc42bpaa	Cdc42bpa	CDC42BPA
UF_Ppr_AF_104886	cdc42bpab	Cdc42bpa	CDC42BPA
UF_Ppr_AF_112976	cdc42bpb	Cdc42bpb	CDC42BPB
UF_Ppr_AF_111653	cdc42ep3	Cdc42ep3	CDC42EP3
UF_Ppr_AF_108121	cdc42ep4b	Cdc42ep4	CDC42EP4
UF_Ppr_AF_108013	cdc42ep5	Cdc42ep5	CDC42EP5
UF_Ppr_AF_107497	cdc45	Cdc45	CDC45
UF_Ppr_AF_101516	cdc6	Cdc6	CDC6
UF_Ppr_AF_104163	cdc7	Cdc7	CDC7
UF_Ppr_AF_116397	cdca4	Cdca4	CDCA4
UF_Ppr_AF_100027	cdca4	Cdca4	CDCA4
UF_Ppr_AF_118835	cdh1	Cdh1	CDH1
UF_Ppr_AF_104250	cdh11	Cdh11	CDH11
UF_Ppr_AF_101460	cdh16	Cdh16	CDH16
UF_Ppr_AF_106355	CDH18	Cdh18	CDH18
UF_Ppr_AF_110029	cdh2	Cdh2	CDH2
UF_Ppr_AF_111221	cdh26.2	Cdh26	CDH26
UF_Ppr_AF_118214	cdhr1a	Cdhr1	CDHR1
UF_Ppr_AF_100062	cdip1	Cdip1	CDIP1
UF_Ppr_AF_103322	cdipt	Cdipt	CDIPT
UF_Ppr_AF_101801	cdk1	Cdk1	CDK1
UF_Ppr_AF_102272	cdk11b	Cdk11b	CDK11B
UF_Ppr_AF_100722	cdk12	Cdk12	CDK12
UF_Ppr_AF_117392	cdk12	Cdk12	CDK12
UF_Ppr_AF_110263	cdk13	Cdk13	CDK13
UF_Ppr_AF_104395	cdk16	Cdk16	CDK16
UF_Ppr_AM_119492	cdk16	Cdk16	CDK16
UF_Ppr_AF_107615	cdk5	Cdk5	CDK5
UF_Ppr_AF_118403	cdk5r2a	Cdk5r2	CDK5R2
UF_Ppr_AF_114336	cdk5rap2	Cdk5rap2	CDK5RAP2
UF_Ppr_AF_114442	cdk6	Cdk6	CDK6
UF_Ppr_AF_104390	cdk7	Cdk7	CDK7
UF_Ppr_AM_119789	cdkl1	Cdkl1	CDKL1
UF_Ppr_AF_114059	cdkl5	Cdkl5	CDKL5
UF_Ppr_AF_114355	cdkn1bb	Cdkn1b	CDKN1B
UF_Ppr_AF_102710	cdkn1ba	Cdkn1b	CDKN1B
UF_Ppr_AF_112697	cdkn2aip	Cdkn2aip	CDKN2AIP
UF_Ppr_AF_117217	cds2	Cds2	CDS2
UF_Ppr_AF_114198	cdt1	Cdt1	CDT1
UF_Ppr_AF_114791	cdv3	Cdv3	CDV3
UF_Ppr_AF_116673	cdx4	Cdx4	CDX4
UF_Ppr_AF_100078	cdyl	Cdyl	CDYL
UF_Ppr_AF_118494	cdyl	Cdyl	CDYL
UF_Ppr_AF_109066	si:dkey-93h22.7	Ceacam20	CEACAM20
UF_Ppr_AM_119542	si:dkeyp-97a10.3	Ceacam20	CEACAM20
UF_Ppr_AF_110129	cebpa	Cebpa	CEBPA
UF_Ppr_AF_108368	cebpb	Cebpb	CEBPB
UF_Ppr_AF_118043	cebpd	Cebpd	CEBPD
UF_Ppr_AF_103325	cebpg	Cebpg	CEBPG
UF_Ppr_AF_118172	cecr2	Cecr2	CECR2
UF_Ppr_AF_109993	celf1	Celf1	CELF1
UF_Ppr_AF_103265	celf1	Celf1	CELF1
UF_Ppr_AF_118851	celf3b	Celf3	CELF3
UF_Ppr_AF_104246	cenpf	Cenpf	CENPF
UF_Ppr_AF_118611	si:dkeyp-115e12.6	Cenpf	CENPF
UF_Ppr_AF_111141	si:dkeyp-115e12.6	Cenpf	CENPF
UF_Ppr_AF_103307	cenpl	Cenpl	CENPL
UF_Ppr_AF_100665	cenpo	Cenpo	CENPO
UF_Ppr_AF_109726	cenps	Cenps	CENPS
UF_Ppr_AF_112690	cenpw	Cenpw	CENPW
UF_Ppr_AF_118301	cep104	Cep104	CEP104
UF_Ppr_AF_102170	cep112	Cep112	CEP112
UF_Ppr_AF_108734	cep126	Cep126	CEP126
UF_Ppr_AF_116532	cep131	Cep131	CEP131
UF_Ppr_AF_112048	cep135	Cep135	CEP135
UF_Ppr_AF_114200	cep152	Cep152	CEP152
UF_Ppr_AF_109453	cep170b	Cep170b	CEP170B
UF_Ppr_AF_114366	cep192	Cep192	CEP192
UF_Ppr_AF_116287	cep290	Cep290	CEP290
UF_Ppr_AF_103628	cep290	Cep290	CEP290
UF_Ppr_AF_101955	cep350	Cep350	CEP350
UF_Ppr_AM_119891	cep350	Cep350	CEP350
UF_Ppr_AF_113829	cep41	Cep41	CEP41
UF_Ppr_AF_108361	fgfr1op	Cep43
UF_Ppr_AF_101182	cep63	Cep63	CEP63
UF_Ppr_AF_105435	cep70	Cep70	CEP70
UF_Ppr_AF_102614	cep76	Cep76	CEP76
UF_Ppr_AF_111683	cep85l	Cep85l	CEP85L
UF_Ppr_AF_104003	cep89	Cep89	CEP89
UF_Ppr_AF_103920	cept1a	Cept1	CEPT1
UF_Ppr_AF_107422	cept1b	Cept1	CEPT1
UF_Ppr_AF_113509	dand5	Cer1	CER1
UF_Ppr_AF_117130	cers1	Cers1	CERS1
UF_Ppr_AF_107150	cers4a	Cers4	CERS4
UF_Ppr_AF_100698	cers5	Cers5	CERS5
UF_Ppr_AF_115437	cert1b	Cert1
UF_Ppr_AF_114302	cfap157	Cfap157	CFAP157
UF_Ppr_AF_117326	C6H3orf67	Cfap20dc
UF_Ppr_AF_103329	si:ch73-222h13.1	Cfap221	CFAP221
UF_Ppr_AF_118746	cfap43	Cfap43	CFAP43
UF_Ppr_AF_118264	cfap45	Cfap45	CFAP45
UF_Ppr_AF_105209	cfap57	Cfap57	CFAP57
UF_Ppr_AF_105693	cacna1db	Cfap74	CFAP74
UF_Ppr_AF_114503	cacna1db	Cfap74	CFAP74
UF_Ppr_AF_116772	si:ch211-215c18.3	Cfap77	CFAP77
UF_Ppr_AF_109954	cfap97	Cfap97	CFAP97
UF_Ppr_AF_103171	cfap97	Cfap97	CFAP97
UF_Ppr_AF_116587	cfap99	Cfap99	CFAP99
UF_Ppr_AF_117400	cfap99	Cfap99	CFAP99
UF_Ppr_AF_117121	cfdp1	Cfdp1	CFDP1
UF_Ppr_AF_104744	cfhl5	Cfhr1	CFHR1
UF_Ppr_AF_108943	cfl1	Cfl1	CFL1
UF_Ppr_AF_114324	cga	Cga	CGA
UF_Ppr_AF_106424	cgnl1	Cgnl1	CGNL1
UF_Ppr_AF_110633	cgrrf1	Cgrrf1	CGRRF1
UF_Ppr_AF_113047	cgrrf1	Cgrrf1	CGRRF1
UF_Ppr_AF_110219	ch25hl2	Ch25h	CH25H
UF_Ppr_AF_100378	ch25hl3	Ch25h	CH25H
UF_Ppr_AF_107228	ch25hl3	Ch25h	CH25H
UF_Ppr_AF_115906	chac2	Chac2	CHAC2
UF_Ppr_AF_116863	chaf1a	Chaf1a	CHAF1A
UF_Ppr_AF_104712	chaf1b	Chaf1b	CHAF1B
UF_Ppr_AF_105777	chata	Chat	CHAT
UF_Ppr_AF_109815	chchd6a	Chchd6	CHCHD6
UF_Ppr_AF_110317	chchd6b	Chchd6	CHCHD6
UF_Ppr_AF_107870	chd1	Chd1	CHD1
UF_Ppr_AF_117325	chd1	Chd1	CHD1
UF_Ppr_AM_119948	chd1	Chd1	CHD1
UF_Ppr_AF_113178	chd1l	Chd1l	CHD1L
UF_Ppr_AF_106233	chd2	Chd2	CHD2
UF_Ppr_AF_110742	chd3	Chd3	CHD3
UF_Ppr_AF_105182	chd6	Chd6	CHD6
UF_Ppr_AF_112313	chd7	Chd7	CHD7
UF_Ppr_AF_107827	chd9	Chd9	CHD9
UF_Ppr_AF_100130	chd9	Chd9	CHD9
UF_Ppr_AF_114697	cherp	Cherp	CHERP
UF_Ppr_AF_104923	chga	Chga	CHGA
UF_Ppr_AF_110080	chgb	Chgb	CHGB
UF_Ppr_AF_112434	chic1	Chic1	CHIC1
UF_Ppr_AF_102340	chid1	Chid1	CHID1
UF_Ppr_AF_111074	chka	Chka	CHKA
UF_Ppr_AF_106150	chkb	Chkb	CHKB
UF_Ppr_AF_110555	chl1b	Chl1	CHL1
UF_Ppr_AF_106814	chl1a	Chl1	CHL1
UF_Ppr_AF_115371	chmp4ba	Chmp4b	CHMP4B
UF_Ppr_AF_110791	chmp4bb	Chmp4b	CHMP4B
UF_Ppr_AF_118742	chmp7	Chmp7	CHMP7
UF_Ppr_AF_106254	chn1	Chn1	CHN1
UF_Ppr_AF_109881	chodl	Chodl	CHODL
UF_Ppr_AF_107694	chpfa	Chpf	CHPF
UF_Ppr_AF_114842	chpf2	Chpf2	CHPF2
UF_Ppr_AF_108101	chpf2	Chpf2	CHPF2
UF_Ppr_AF_118379	chpt1	Chpt1	CHPT1
UF_Ppr_AF_111127	chrd	Chrd	CHRD
UF_Ppr_AM_119927	chrd	Chrd	CHRD
UF_Ppr_AF_101335	chrna1	Chrna1	CHRNA1
UF_Ppr_AF_103789	chrna6	Chrna6	CHRNA6
UF_Ppr_AF_113907	si:ch211-39a7.1	Chrna7	CHRNA7
UF_Ppr_AF_103114	chrnb1	Chrnb1	CHRNB1
UF_Ppr_AF_103237	chrnb3a	Chrnb3	CHRNB3
UF_Ppr_AF_115414	chrnb4	Chrnb4	CHRNB4
UF_Ppr_AF_112849	chrne	Chrne	CHRNE
UF_Ppr_AF_102540	chst11	Chst11	CHST11
UF_Ppr_AF_100012	chst12a	Chst12	CHST12
UF_Ppr_AF_103776	si:ch73-62b13.1	Chst3	CHST3
UF_Ppr_AF_109182	chsy1	Chsy1	CHSY1
UF_Ppr_AF_107915	chsy3	Chsy3	CHSY3
UF_Ppr_AF_117521	chtf18	Chtf18	CHTF18
UF_Ppr_AF_116557	chtf8	Chtf8	CHTF8
UF_Ppr_AM_119366	chtopa	Chtop	CHTOP
UF_Ppr_AF_116918	ciarta	Ciart	CIART
UF_Ppr_AF_112773	cib2	Cib2	CIB2
UF_Ppr_AF_117063	cica	Cic	CIC
UF_Ppr_AM_119862	cicb	Cic	CIC
UF_Ppr_AF_108573	cicb	Cic	CIC
UF_Ppr_AM_120439	cica	Cic	CIC
UF_Ppr_AM_120477	cideb	Cideb	CIDEB
UF_Ppr_AF_109779	ciita	Ciita	CIITA
UF_Ppr_AF_105574	cipcb	Cipc	CIPC
UF_Ppr_AF_105413	cirbpb	Cirbp	CIRBP
UF_Ppr_AF_107249	cirbpa	Cirbp	CIRBP
UF_Ppr_AF_112921	cita	Cit	CIT
UF_Ppr_AF_106366	cited1	Cited1	CITED1
UF_Ppr_AF_107165	cited2	Cited2	CITED2
UF_Ppr_AF_118132	cited2	Cited2	CITED2
UF_Ppr_AM_119176	cited2	Cited2	CITED2
UF_Ppr_AF_113473	cited4b	Cited4	CITED4
UF_Ppr_AF_115748	ckap5	Ckap5	CKAP5
UF_Ppr_AF_106181	ckbb	Ckb	CKB
UF_Ppr_AF_105824	ckmt1	Ckmt1	CKMT1B
UF_Ppr_AF_109639	ckmt2a	Ckmt2	CKMT2
UF_Ppr_AF_114550	clasp1a	Clasp1	CLASP1
UF_Ppr_AF_114561	clasrp	Clasrp	CLASRP
UF_Ppr_AF_117345	clca1	Clca3a1	CLCA4
UF_Ppr_AF_102223	clcn1b	Clcn1	CLCN1
UF_Ppr_AF_112998	clcn2b	Clcn2	CLCN2
UF_Ppr_AF_116163	clcn3	Clcn3	CLCN3
UF_Ppr_AF_115802	clcn3	Clcn3	CLCN3
UF_Ppr_AF_109360	clcn6	Clcn6	CLCN6
UF_Ppr_AF_112759	clcnk	Clcnka	CLCNKB
UF_Ppr_AF_109913	cldn11a	Cldn11	CLDN11
UF_Ppr_AF_109322	cldn12	Cldn12	CLDN12
UF_Ppr_AF_102836	cldn15b	Cldn15	CLDN15
UF_Ppr_AM_120534	si:dkey-221l4.11	Cldn23	CLDN23
UF_Ppr_AF_118810	cldn23a	Cldn23	CLDN23
UF_Ppr_AF_118276	cldnk	Cldn6	CLDN6
UF_Ppr_AF_104579	cldni	Cldn9	CLDN9
UF_Ppr_AF_100511	cldnd1b	Cldnd1	CLDND1
UF_Ppr_AF_110184	clec11a	Clec11a	CLEC11A
UF_Ppr_AF_103167	clec16a	Clec16a	CLEC16A
UF_Ppr_AF_110928	clec16a	Clec16a	CLEC16A
UF_Ppr_AF_110984	si:dkey-11o15.5	Clec4f	CLEC4F
UF_Ppr_AF_111405	si:ch211-274f20.2	Clgn	CLGN
UF_Ppr_AF_104090	clgn	Clgn	CLGN
UF_Ppr_AF_117363	clic4	Clic4	CLIC4
UF_Ppr_AF_107605	clip1a	Clip1	CLIP1
UF_Ppr_AF_113366	clip2	Clip2	CLIP2
UF_Ppr_AF_107271	clip3	Clip3	CLIP3
UF_Ppr_AM_119759	clk2b	Clk2	CLK2
UF_Ppr_AF_103299	clk2a	Clk2	CLK2
UF_Ppr_AF_100513	clk2b	Clk2	CLK2
UF_Ppr_AF_105353	cln3	Cln3	CLN3
UF_Ppr_AF_115386	cln6a	Cln6	CLN6
UF_Ppr_AF_102255	cln8	Cln8	CLN8
UF_Ppr_AF_116065	cln8	Cln8	CLN8
UF_Ppr_AF_101984	clns1a	Clns1a	CLNS1A
UF_Ppr_AF_117496	clockb	Clock	CLOCK
UF_Ppr_AF_104474	clptm1l	Clptm1l	CLPTM1L
UF_Ppr_AF_110054	clrn2	Clrn2	CLRN2
UF_Ppr_AF_107971	clstn1	Clstn1	CLSTN1
UF_Ppr_AF_100592	clstn1	Clstn1	CLSTN1
UF_Ppr_AF_106662	CLSTN2	Clstn2	CLSTN2
UF_Ppr_AF_112736	clta	Clta	CLTA
UF_Ppr_AF_116384	cltca	Cltc	CLTC
UF_Ppr_AF_106942	cltca	Cltc	CLTC
UF_Ppr_AF_101789	clul1	Clu	CLU
UF_Ppr_AF_104412	clu	Clu	CLU
UF_Ppr_AF_108042	clybl	Clybl	CLYBL
UF_Ppr_AF_102989	si:dkey-21e2.14	Cma2	GZMB
UF_Ppr_AF_117578	cmbl	Cmbl	CMBL
UF_Ppr_AF_103677	cmip	Cmip	CMIP
UF_Ppr_AM_119108	cmip	Cmip	CMIP
UF_Ppr_AF_115584	cmpk	Cmpk1	CMPK1
UF_Ppr_AF_106801	cmpk2	Cmpk2	CMPK2
UF_Ppr_AF_108501	cnbpb	Cnbp	CNBP
UF_Ppr_AF_117755	zgc:114181	Cndp1	CNDP1
UF_Ppr_AF_104048	cnep1r1	Cnep1r1	CNEP1R1
UF_Ppr_AM_119947	cnep1r1	Cnep1r1	CNEP1R1
UF_Ppr_AF_105524	cnga4	Cnga4	CNGA4
UF_Ppr_AF_102127	cngb1a	Cngb1	CNGB1
UF_Ppr_AM_119497	cnih1	Cnih1	CNIH1
UF_Ppr_AF_118748	cnih1	Cnih1	CNIH1
UF_Ppr_AF_115004	cnih2	Cnih2	CNIH2
UF_Ppr_AF_109557	cnksr2b	Cnksr2	CNKSR2
UF_Ppr_AF_110320	cnn3a	Cnn3	CNN3
UF_Ppr_AF_111782	cnnm2a	Cnnm2	CNNM2
UF_Ppr_AF_103669	cnot1	Cnot1	CNOT1
UF_Ppr_AF_112935	cnot1	Cnot1	CNOT1
UF_Ppr_AF_114952	cnot10	Cnot10	CNOT10
UF_Ppr_AM_119116	cnot2	Cnot2	CNOT2
UF_Ppr_AM_120573	cnot2	Cnot2	CNOT2
UF_Ppr_AF_108570	cnot2	Cnot2	CNOT2
UF_Ppr_AF_104634	cnot3a	Cnot3	CNOT3
UF_Ppr_AF_101936	cnot3a	Cnot3	CNOT3
UF_Ppr_AF_117904	cnot4b	Cnot4	CNOT4
UF_Ppr_AM_120324	cnot4b	Cnot4	CNOT4
UF_Ppr_AF_105200	cnot4b	Cnot4	CNOT4
UF_Ppr_AF_111028	cnot6a	Cnot6	CNOT6
UF_Ppr_AM_120676	cnot6a	Cnot6	CNOT6
UF_Ppr_AF_104524	cnot6l	Cnot6l	CNOT6L
UF_Ppr_AF_108869	cnot7	Cnot7	CNOT7
UF_Ppr_AF_116829	cnot7	Cnot7	CNOT7
UF_Ppr_AF_112689	cnot8	Cnot8	CNOT8
UF_Ppr_AF_103098	cnot9	Cnot9	CNOT9
UF_Ppr_AF_107069	cnp	Cnp	CNP
UF_Ppr_AF_104014	cnppd1	Cnppd1	CNPPD1
UF_Ppr_AF_102580	cnpy3	Cnpy3	CNPY3
UF_Ppr_AF_113518	cnpy4	Cnpy4	CNPY4
UF_Ppr_AF_109986	cnr1	Cnr1	CNR1
UF_Ppr_AF_104592	cnrip1a	Cnrip1	CNRIP1
UF_Ppr_AF_114125	cntfr	Cntfr	CNTFR
UF_Ppr_AF_111410	cntln	Cntln	CNTLN
UF_Ppr_AF_102366	cntln	Cntln	CNTLN
UF_Ppr_AF_116313	cntn4	Cntn4	CNTN4
UF_Ppr_AF_103924	cntn5	Cntn5	CNTN5
UF_Ppr_AF_100832	cntnap1	Cntnap1	CNTNAP1
UF_Ppr_AF_111622	cntnap5l	Cntnap5c	CNTNAP5
UF_Ppr_AF_100123	cntnap5b	Cntnap5c	CNTNAP5
UF_Ppr_AF_112735	cntnap5b	Cntnap5c	CNTNAP5
UF_Ppr_AF_110156	cntrl	Cntrl	CNTRL
UF_Ppr_AF_108180	coa8	Coa8
UF_Ppr_AF_111213	coasy	Coasy	COASY
UF_Ppr_AF_116539	coch	Coch	COCH
UF_Ppr_AF_106449	cog2	Cog2	COG2
UF_Ppr_AF_113123	cog2	Cog2	COG2
UF_Ppr_AF_117107	cog4	Cog4	COG4
UF_Ppr_AF_115566	cog5	Cog5	COG5
UF_Ppr_AF_115686	cog5	Cog5	COG5
UF_Ppr_AF_116190	cog6	Cog6	COG6
UF_Ppr_AF_117934	cog8	Cog8	COG8
UF_Ppr_AF_109906	col10a1a	Col10a1	COL10A1
UF_Ppr_AF_114260	col11a1a	Col11a1	COL11A1
UF_Ppr_AF_117683	col11a2	Col11a2	COL11A2
UF_Ppr_AF_104470	col12a1a	Col12a1	COL12A1
UF_Ppr_AF_108757	col12a1a	Col12a1	COL12A1
UF_Ppr_AF_106616	col14a1a	Col14a1	COL14A1
UF_Ppr_AF_109149	col17a1b	Col17a1	COL17A1
UF_Ppr_AF_116906	col18a1a	Col18a1	COL18A1
UF_Ppr_AF_112205	col18a1a	Col18a1	COL18A1
UF_Ppr_AF_102386	col1a2	Col1a2	COL1A2
UF_Ppr_AF_109773	col2a1a	Col2a1	COL2A1
UF_Ppr_AM_119494	col4a1	Col4a1	COL4A1
UF_Ppr_AF_109490	col4a1	Col4a1	COL4A1
UF_Ppr_AF_106213	col6a1	Col6a1	COL6A1
UF_Ppr_AF_108544	col8a1a	Col8a1	COL8A1
UF_Ppr_AF_100640	col9a1b	Col9a1	COL9A1
UF_Ppr_AF_109166	col9a1b	Col9a1	COL9A1
UF_Ppr_AF_113589	col9a2	Col9a2	COL9A2
UF_Ppr_AF_118817	col9a3	Col9a3	COL9A3
UF_Ppr_AF_103178	colec11	Colec11	COLEC11
UF_Ppr_AF_115625	colec12	Colec12	COLEC12
UF_Ppr_AF_110361	COLGALT1	Colgalt1	COLGALT1
UF_Ppr_AF_110241	colgalt2	Colgalt2	COLGALT2
UF_Ppr_AF_104075	cop1	Cop1	COP1
UF_Ppr_AF_115492	copb1	Copb1	COPB1
UF_Ppr_AF_101419	copb2	Copb2	COPB2
UF_Ppr_AF_111579	cops2	Cops2	COPS2
UF_Ppr_AF_113345	cops4	Cops4	COPS4
UF_Ppr_AF_115547	cops7a	Cops7a	COPS7A
UF_Ppr_AF_114539	si:ch73-141c7.1	Coq10a	COQ10A
UF_Ppr_AF_106051	si:ch73-141c7.1	Coq10a	COQ10A
UF_Ppr_AF_101308	coq5	Coq5	COQ5
UF_Ppr_AF_103228	coq8aa	Coq8a	COQ8A
UF_Ppr_AF_104945	coq9	Coq9	COQ9
UF_Ppr_AF_117106	coro1a	Coro1a	CORO1A
UF_Ppr_AF_108952	coro1b	Coro1b	CORO1B
UF_Ppr_AF_112807	coro1ca	Coro1c	CORO1C
UF_Ppr_AF_107133	coro1cb	Coro1c	CORO1C
UF_Ppr_AF_110766	coro2bb	Coro2b	CORO2B
UF_Ppr_AF_115784	coro7	Coro7	CORO7
UF_Ppr_AF_105382	cort	Cort	CORT
UF_Ppr_AF_113599	cort	Cort	CORT
UF_Ppr_AF_115483	cotl1	Cotl1	COTL1
UF_Ppr_AF_115215	cox10	Cox10	COX10
UF_Ppr_AF_110542	cox4i1	Cox4i1	COX4I1
UF_Ppr_AF_108897	cox5aa	Cox5a	COX5A
UF_Ppr_AF_111675	cox6a1	Cox6a2	COX6A2
UF_Ppr_AF_110665	cox6c	Cox6c	COX6C
UF_Ppr_AF_110319	cox7a2a	Cox7a2	COX7A2
UF_Ppr_AF_101670	cox7b	Cox7b	COX7B
UF_Ppr_AF_110222	cox7c	Cox7c	COX7C
UF_Ppr_AF_104132	cpb2	Cpb2	CPB2
UF_Ppr_AF_100796	cpe	Cpe	CPE
UF_Ppr_AF_118141	cpe	Cpe	CPE
UF_Ppr_AF_107815	cpeb1b	Cpeb1	CPEB1
UF_Ppr_AF_102774	cpeb2	Cpeb2	CPEB2
UF_Ppr_AF_115080	cpeb4b	Cpeb4	CPEB4
UF_Ppr_AF_108504	cplx4c	Cplx4	CPLX4
UF_Ppr_AF_108053	cpne2	Cpne2	CPNE2
UF_Ppr_AF_109020	cpne9	Cpne9	CPNE9
UF_Ppr_AF_112336	cpsf1	Cpsf1	CPSF1
UF_Ppr_AF_107484	cpsf2	Cpsf2	CPSF2
UF_Ppr_AF_111342	cpsf3	Cpsf3	CPSF3
UF_Ppr_AF_105282	cpsf6	Cpsf6	CPSF6
UF_Ppr_AF_109123	cpt1aa	Cpt1a	CPT1A
UF_Ppr_AF_111193	cpvl	Cpvl	CPVL
UF_Ppr_AF_105690	cpxm1a	Cpxm1	CPXM1
UF_Ppr_AF_103864	crabp1a	Crabp1	CRABP1
UF_Ppr_AF_104369	cracr2b	Cracr2b	CRACR2B
UF_Ppr_AF_101070	cramp1	Cramp1	CRAMP1
UF_Ppr_AM_120164	cratb	Crat	CRAT
UF_Ppr_AF_115433	crata	Crat	CRAT
UF_Ppr_AF_109859	crb2a	Crb2	CRB2
UF_Ppr_AF_114179	crbn	Crbn	CRBN
UF_Ppr_AF_100636	creb3l2	Creb3l2	CREB3L2
UF_Ppr_AF_109943	creb3l2	Creb3l2	CREB3L2
UF_Ppr_AF_102367	crebbpb	Crebbp	CREBBP
UF_Ppr_AF_117780	crebbpb	Crebbp	CREBBP
UF_Ppr_AM_119839	crebbpb	Crebbp	CREBBP
UF_Ppr_AF_118948	creg1	Creg1	CREG1
UF_Ppr_AF_115612	creg1	Creg1	CREG1
UF_Ppr_AF_109342	creg2	Creg2	CREG2
UF_Ppr_AF_118261	crhb	Crh	CRH
UF_Ppr_AF_109608	crhbp	Crhbp	CRHBP
UF_Ppr_AF_111540	crip1	Crip1	CRIP1
UF_Ppr_AF_108553	crip2	Crip2	CRIP2
UF_Ppr_AF_110409	crispld1b	Crispld1	CRISPLD1
UF_Ppr_AF_113613	crispld2	Crispld2	CRISPLD2
UF_Ppr_AF_103652	crk	Crk	CRK
UF_Ppr_AF_117601	crlf1a	Crlf1	CRLF1
UF_Ppr_AF_110932	crlf3	Crlf3	CRLF3
UF_Ppr_AF_112523	crls1	Crls1	CRLS1
UF_Ppr_AF_103209	crnkl1	Crnkl1	CRNKL1
UF_Ppr_AF_103566	crot	Crot	CROT
UF_Ppr_AF_117109	crppa	Crppa	CRPPA
UF_Ppr_AF_118937	crtac1a	Crtac1	CRTAC1
UF_Ppr_AF_118541	crtc3	Crtc3	CRTC3
UF_Ppr_AF_105270	cry-dash	Cry1	CRY1
UF_Ppr_AF_107756	cryba1b	Cryba1	CRYBA1
UF_Ppr_AF_106000	cryba1a	Cryba1	CRYBA1
UF_Ppr_AF_100824	cryba4	Cryba4	CRYBA4
UF_Ppr_AF_113749	crybb2	Crybb2	CRYBB2
UF_Ppr_AF_109545	crybb3	Crybb3	CRYBB3
UF_Ppr_AF_104778	crybg1a	Crybg1	CRYBG1
UF_Ppr_AF_116917	crygmx	Cryga	CRYGA
UF_Ppr_AF_119073	crygm2d9	Cryga	CRYGA
UF_Ppr_AF_103038	crybgx	Crygn	CRYGN
UF_Ppr_AF_102472	crygn2	Crygn	CRYGN
UF_Ppr_AF_111639	crygs1	Crygs	CRYGS
UF_Ppr_AF_102174	cryz	Cryz	CRYZ
UF_Ppr_AF_116826	cs	Cs	CS
UF_Ppr_AF_117688	csde1	Csde1	CSDE1
UF_Ppr_AF_104468	csde1	Csde1	CSDE1
UF_Ppr_AF_118951	csde1	Csde1	CSDE1
UF_Ppr_AF_105993	cse1l	Cse1l	CSE1L
UF_Ppr_AF_111057	csgalnact2	Csgalnact2	CSGALNACT2
UF_Ppr_AF_115817	csnk1a1	Csnk1a1	CSNK1A1
UF_Ppr_AF_110594	csnk1da	Csnk1d	CSNK1D
UF_Ppr_AF_116988	csnk1g2b	Csnk1g2	CSNK1G2
UF_Ppr_AF_106275	csnk2a1	Csnk2a1	CSNK2A1
UF_Ppr_AF_108681	csnk2a2a	Csnk2a2	CSNK2A2
UF_Ppr_AF_103695	csnk2b	Csnk2b	CSNK2B
UF_Ppr_AF_107987	csrnp1a	Csrnp1	CSRNP1
UF_Ppr_AM_119088	csrnp2	Csrnp2	CSRNP2
UF_Ppr_AF_112137	cst3	Cst3	CST3
UF_Ppr_AF_114904	cstf1	Cstf1	CSTF1
UF_Ppr_AF_105735	cstf1	Cstf1	CSTF1
UF_Ppr_AF_109667	cstf2	Cstf2	CSTF2
UF_Ppr_AF_114343	cstf3	Cstf3	CSTF3
UF_Ppr_AF_111868	fa96d06	Ctbp1	CTBP1
UF_Ppr_AF_114506	ctbp2a	Ctbp2	CTBP2
UF_Ppr_AF_108397	ctc1	Ctc1	CTC1
UF_Ppr_AF_112876	ctcf	Ctcf	CTCF
UF_Ppr_AF_114359	ctdnep1a	Ctdnep1	CTDNEP1
UF_Ppr_AF_112738	ctdp1	Ctdp1	CTDP1
UF_Ppr_AF_102242	ctdsp1	Ctdsp1	CTDSP1
UF_Ppr_AM_119918	ctdsp1	Ctdsp1	CTDSP1
UF_Ppr_AF_118990	ctdsp2	Ctdsp2	CTDSP2
UF_Ppr_AF_104688	ctdsp2	Ctdsp2	CTDSP2
UF_Ppr_AF_111535	ctdspla	Ctdspl	CTDSPL
UF_Ppr_AF_106259	ctif	Ctif	CTIF
UF_Ppr_AF_114691	ctnna1	Ctnna1	CTNNA1
UF_Ppr_AF_100013	ctnna2	Ctnna2	CTNNA2
UF_Ppr_AM_120072	ctnna2	Ctnna2	CTNNA2
UF_Ppr_AF_102959	ctnna2	Ctnna2	CTNNA2
UF_Ppr_AF_110355	ctnnb1	Ctnnb1	CTNNB1
UF_Ppr_AF_104594	ctnnbip1	Ctnnbip1	CTNNBIP1
UF_Ppr_AF_105174	ctnnd2a	Ctnnd2	CTNND2
UF_Ppr_AF_111601	ctns	Ctns	CTNS
UF_Ppr_AF_109799	ctr9	Ctr9	CTR9
UF_Ppr_AF_108171	ctrb1	Ctrb1	CTRB2
UF_Ppr_AF_107572	ctrl	Ctrl	CTRL
UF_Ppr_AF_103506	ctsd	Ctsd	CTSD
UF_Ppr_AF_116798	ctsf	Ctsf	CTSF
UF_Ppr_AF_115134	ctsla	Ctsl	CTSV
UF_Ppr_AF_104721	ctso	Ctso	CTSO
UF_Ppr_AF_114205	si:dkey-228a15.1	Ctsr	CTSL
UF_Ppr_AF_115461	ctss1	Ctss	CTSS
UF_Ppr_AF_102389	cttn	Cttn	CTTN
UF_Ppr_AF_105494	cttnbp2nla	Cttnbp2nl	CTTNBP2NL
UF_Ppr_AF_116006	ctu2	Ctu2	CTU2
UF_Ppr_AF_100735	cuedc1a	Cuedc1	CUEDC1
UF_Ppr_AF_114258	cuedc1b	Cuedc1	CUEDC1
UF_Ppr_AF_116412	cuedc2	Cuedc2	CUEDC2
UF_Ppr_AF_102569	cul1a	Cul1	CUL1
UF_Ppr_AF_103678	cul1b	Cul1	CUL1
UF_Ppr_AF_102010	cul2	Cul2	CUL2
UF_Ppr_AF_113213	cul2	Cul2	CUL2
UF_Ppr_AF_100070	cul3a	Cul3	CUL3
UF_Ppr_AM_119503	cul3b	Cul3	CUL3
UF_Ppr_AF_103756	cul3b	Cul3	CUL3
UF_Ppr_AF_109895	cul4b	Cul4b	CUL4B
UF_Ppr_AF_117389	cul5a	Cul5	CUL5
UF_Ppr_AF_106013	cux1b	Cux1	CUX1
UF_Ppr_AM_119820	cux1a	Cux1	CUX1
UF_Ppr_AF_118562	cuzd1.2	Cuzd1	CUZD1
UF_Ppr_AF_118329	cwc22	Cwc22	CWC22
UF_Ppr_AF_102860	cwc22	Cwc22	CWC22
UF_Ppr_AF_110046	cwc27	Cwc27	CWC27
UF_Ppr_AF_114627	cwf19l1	Cwf19l1	CWF19L1
UF_Ppr_AF_107108	cxcl12a	Cxcl12	CXCL12
UF_Ppr_AF_112122	cxcl12b	Cxcl12	CXCL12
UF_Ppr_AF_108085	cxcl14	Cxcl14	CXCL14
UF_Ppr_AF_105469	cxcr3.2	Cxcr3	CXCR3
UF_Ppr_AF_109863	cxcr4b	Cxcr4	CXCR4
UF_Ppr_AF_110400	cxxc1a	Cxxc1	CXXC1
UF_Ppr_AF_110193	cxxc5a	Cxxc5	CXXC5
UF_Ppr_AF_101620	cyb561	Cyb561	CYB561
UF_Ppr_AF_111826	cyb5a	Cyb5a	CYB5A
UF_Ppr_AF_107965	cyb5d1	Cyb5d1	CYB5D1
UF_Ppr_AF_114405	cyb5r1	Cyb5r1	CYB5R1
UF_Ppr_AF_110804	cyc1	Cyc1	CYC1
UF_Ppr_AF_100840	cycsb	Cycs	CYCS
UF_Ppr_AF_100814	cyfip1	Cyfip1	CYFIP1
UF_Ppr_AF_106009	cyhr1	Cyhr1	CYHR1
UF_Ppr_AF_100053	cylda	Cyld	CYLD
UF_Ppr_AF_106506	cyp19a1a	Cyp19a1	CYP19A1
UF_Ppr_AF_110740	cyp1c2	Cyp1a2	CYP1A2
UF_Ppr_AF_105892	cyp1c2	Cyp1a2	CYP1A2
UF_Ppr_AF_112901	cyp1b1	Cyp1b1	CYP1B1
UF_Ppr_AF_107693	cyp20a1	Cyp20a1	CYP20A1
UF_Ppr_AF_108824	cyp26a1	Cyp26a1	CYP26A1
UF_Ppr_AF_114713	cyp26b1	Cyp26b1	CYP26B1
UF_Ppr_AF_101873	si:ch211-113j14.1	Cyp27a1	CYP27A1
UF_Ppr_AF_109087	cyp27a7	Cyp27a1	CYP27A1
UF_Ppr_AF_115703	cyp27c1	Cyp27b1	CYP27B1
UF_Ppr_AF_118425	cyp27b1	Cyp27b1	CYP27B1
UF_Ppr_AF_114888	cyp2ae1	Cyp2j12	CYP2J2
UF_Ppr_AF_103190	cyp2p9	Cyp2j8	CYP2J2
UF_Ppr_AF_113831	cyp2n13	Cyp2j8	CYP2J2
UF_Ppr_AF_117714	cyp2r1	Cyp2r1	CYP2R1
UF_Ppr_AF_115744	cyp2u1	Cyp2u1	CYP2U1
UF_Ppr_AF_108747	cyp3c1	Cyp3a11	CYP3A5
UF_Ppr_AF_103590	cyp4t8	Cyp4b1	CYP4B1
UF_Ppr_AF_111793	cyp7b1	Cyp7b1	CYP7B1
UF_Ppr_AF_106566	fam49a	Cyria
UF_Ppr_AF_107202	cyth1a	Cyth1	CYTH1
UF_Ppr_AF_105765	cyth1a	Cyth1	CYTH1
UF_Ppr_AF_112115	si:ch73-215d9.1	D130043K22Rik	KIAA0319
UF_Ppr_AF_108710	ddx3xb	D1Pas1	DDX3Y
UF_Ppr_AF_118931	C17H14orf132	D430019H16Rik	C14orf132
UF_Ppr_AF_111584	kiaa1549la	D430041D05Rik	KIAA1549L
UF_Ppr_AF_107950	zgc:158564	D5Ertd579e	KIAA0232
UF_Ppr_AF_116377	fhdc3	Daam2	DAAM2
UF_Ppr_AF_107338	daam2	Daam2	DAAM2
UF_Ppr_AF_108406	dab1a	Dab1	DAB1
UF_Ppr_AF_104272	DAB2	Dab2	DAB2
UF_Ppr_AF_104801	dab2ipb	Dab2ip	DAB2IP
UF_Ppr_AF_112194	dab2ipb	Dab2ip	DAB2IP
UF_Ppr_AF_103046	dachc	Dach1	DACH1
UF_Ppr_AF_105321	dachb	Dach2	DACH2
UF_Ppr_AF_116866	dact1	Dact1	DACT1
UF_Ppr_AF_113604	si:ch211-168f7.5	Dact2	DACT2
UF_Ppr_AF_101400	dad1	Dad1	DAD1
UF_Ppr_AF_113084	dag1	Dag1	DAG1
UF_Ppr_AF_117393	dagla	Dagla	DAGLA
UF_Ppr_AF_100450	dagla	Dagla	DAGLA
UF_Ppr_AF_102642	dalrd3	Dalrd3	DALRD3
UF_Ppr_AF_117773	dao.2	Dao	DAO
UF_Ppr_AF_109069	dap3	Dap3	DAP3
UF_Ppr_AF_102738	dapk1	Dapk1	DAPK1
UF_Ppr_AF_116521	dap1b	Dapl1	DAPL1
UF_Ppr_AF_107089	dars2	Dars2	DARS2
UF_Ppr_AF_105912	daw1	Daw1	DAW1
UF_Ppr_AF_103685	daxx	Daxx	DAXX
UF_Ppr_AF_108683	daxx	Daxx	DAXX
UF_Ppr_AF_106143	dazap1	Dazap1	DAZAP1
UF_Ppr_AF_113277	dazl	Dazl	DAZL
UF_Ppr_AF_107877	dbf4b	Dbf4	DBF4
UF_Ppr_AF_100390	dbf4	Dbf4	DBF4
UF_Ppr_AF_111582	dbn1	Dbn1	DBN1
UF_Ppr_AF_109040	dbn1	Dbn1	DBN1
UF_Ppr_AF_114864	dbnlb	Dbnl	DBNL
UF_Ppr_AF_118680	dbnlb	Dbnl	DBNL
UF_Ppr_AF_100736	dbr1	Dbr1	DBR1
UF_Ppr_AM_120579	wdr32	Dcaf10	DCAF10
UF_Ppr_AF_106591	wdr32	Dcaf10	DCAF10
UF_Ppr_AF_114384	wdr32	Dcaf10	DCAF10
UF_Ppr_AF_111388	dcaf12	Dcaf12	DCAF12
UF_Ppr_AF_110381	dcaf17	Dcaf17	DCAF17
UF_Ppr_AF_115355	wdr21	Dcaf4	DCAF4
UF_Ppr_AF_110100	dcaf5	Dcaf5	DCAF5
UF_Ppr_AF_107431	dcaf5	Dcaf5	DCAF5
UF_Ppr_AF_101672	dcaf6	Dcaf6	DCAF6
UF_Ppr_AF_101366	dcaf7	Dcaf7	DCAF7
UF_Ppr_AF_101069	dcaf8	Dcaf8	DCAF8
UF_Ppr_AF_109167	dcdc2b	Dcdc2a	DCDC2
UF_Ppr_AF_114666	dcdc2b	Dcdc2a	DCDC2
UF_Ppr_AF_107244	FAT4	Dchs1	DCHS1
UF_Ppr_AF_112411	si:ch211-186j3.6	Dchs1	DCHS1
UF_Ppr_AM_120257	dclk1a	Dclk1	DCLK1
UF_Ppr_AF_108839	dclk1a	Dclk1	DCLK1
UF_Ppr_AF_113304	dclk1a	Dclk1	DCLK1
UF_Ppr_AM_120077	dclk2a	Dclk2	DCLK2
UF_Ppr_AF_109724	dclk2a	Dclk2	DCLK2
UF_Ppr_AF_109428	dclre1a	Dclre1a	DCLRE1A
UF_Ppr_AF_109231	dclre1c	Dclre1c	DCLRE1C
UF_Ppr_AF_108706	dcn	Dcn	DCN
UF_Ppr_AF_100447	dcp1b	Dcp1b	DCP1B
UF_Ppr_AF_115616	dcp2	Dcp2	DCP2
UF_Ppr_AF_118665	dcst1	Dcst1	DCST1
UF_Ppr_AF_107848	dctn2	Dctn2	DCTN2
UF_Ppr_AF_105628	dctpp1	Dctpp1	DCTPP1
UF_Ppr_AF_110632	dcun1d3	Dcun1d3	DCUN1D3
UF_Ppr_AF_115705	dcun1d5	Dcun1d5	DCUN1D5
UF_Ppr_AF_115262	dda1	Dda1	DDA1
UF_Ppr_AF_113305	ddah1	Ddah1	DDAH1
UF_Ppr_AF_113225	ddb2	Ddb2	DDB2
UF_Ppr_AF_105198	ddi2	Ddi2	DDI2
UF_Ppr_AF_105922	ddx1	Ddx1	DDX1
UF_Ppr_AM_120741	ddx11	Ddx11	DDX11
UF_Ppr_AF_100954	ddx18	Ddx18	DDX18
UF_Ppr_AF_117530	ddx20	Ddx20	DDX20
UF_Ppr_AF_111862	ddx20	Ddx20	DDX20
UF_Ppr_AF_115013	ddx23	Ddx23	DDX23
UF_Ppr_AF_102558	ddx31	Ddx31	DDX31
UF_Ppr_AF_103594	ddx39b	Ddx39b	DDX39B
UF_Ppr_AF_117187	ddx4	Ddx4	DDX4
UF_Ppr_AF_110870	ddx42	Ddx42	DDX42
UF_Ppr_AF_100379	ddx43	Ddx43	DDX43
UF_Ppr_AF_104580	ddx46	Ddx46	DDX46
UF_Ppr_AF_116816	ddx49	Ddx49	DDX49
UF_Ppr_AF_107507	ddx5	Ddx5	DDX5
UF_Ppr_AF_102344	ddx54	Ddx54	DDX54
UF_Ppr_AF_101343	ddx55	Ddx55	DDX55
UF_Ppr_AF_101354	ddx59	Ddx59	DDX59
UF_Ppr_AF_113391	ddx61	Ddx6	DDX6
UF_Ppr_AF_105931	ddx61	Ddx6	DDX6
UF_Ppr_AF_102801	ddx6	Ddx6	DDX6
UF_Ppr_AM_120365	ddx6	Ddx6	DDX6
UF_Ppr_AF_104998	ddx61	Ddx6	DDX6
UF_Ppr_AF_115667	dedd	Dedd	DEDD
UF_Ppr_AF_113196	dedd1	Dedd2	DEDD2
UF_Ppr_AF_108052	degs1	Degs1	DEGS1
UF_Ppr_AF_117265	dek	Dek	DEK
UF_Ppr_AF_107508	dennd11	Dennd11
UF_Ppr_AF_109698	si:dkey-76b14.2	Dennd1c	DENND1C
UF_Ppr_AF_103103	si:dkey-76b14.2	Dennd1c	DENND1C
UF_Ppr_AF_108410	dennd3a	Dennd3	DENND3
UF_Ppr_AF_108696	dennd4a	Dennd4a	DENND4A
UF_Ppr_AF_106959	dennd4b	Dennd4b	DENND4B
UF_Ppr_AF_104534	dennd4b	Dennd4b	DENND4B
UF_Ppr_AM_119505	dennd5b	Dennd5b	DENND5B
UF_Ppr_AF_105400	dennd5b	Dennd5b	DENND5B
UF_Ppr_AF_113004	dennd5b	Dennd5b	DENND5B
UF_Ppr_AF_102396	dennd6b	Dennd6b	DENND6B
UF_Ppr_AF_104937	dennd6b	Dennd6b	DENND6B
UF_Ppr_AF_108308	denr	Denr	DENR
UF_Ppr_AF_107934	si:dkeyp-72g9.4	Depp1	DEPP1
UF_Ppr_AF_100277	derl1	Derl1	DERL1
UF_Ppr_AF_106547	derl2	Derl2	DERL2
UF_Ppr_AF_110824	desma	Des	DES
UF_Ppr_AF_116039	desi1a	Desi1	DESI1
UF_Ppr_AF_111055	desi2	Desi2	DESI2
UF_Ppr_AF_110691	desi2	Desi2	DESI2
UF_Ppr_AF_109409	det1	Det1	DET1
UF_Ppr_AF_105929	dgat1b	Dgat1	DGAT1
UF_Ppr_AF_108791	dgat2	Dgat2	DGAT2
UF_Ppr_AF_100227	dgcr2	Dgcr2	DGCR2
UF_Ppr_AF_112096	dgcr8	Dgcr8	DGCR8
UF_Ppr_AF_114879	dgkaa	Dgka	DGKA
UF_Ppr_AF_105190	dgke	Dgke	DGKE
UF_Ppr_AF_113398	si:dkey-172j4.3	Dgkh	DGKH
UF_Ppr_AF_101701	si:dkey-172j4.3	Dgkh	DGKH
UF_Ppr_AF_100721	dgkza	Dgkz	DGKZ
UF_Ppr_AF_104116	dgkzb	Dgkz	DGKZ
UF_Ppr_AF_113722	zgc:110540	Dguok	DGUOK
UF_Ppr_AF_103651	DHDH	Dhdh	DHDH
UF_Ppr_AF_112039	DHDH	Dhdh	DHDH
UF_Ppr_AF_119039	dhrs13a.1	Dhrs13	DHRS13
UF_Ppr_AF_117634	zgc:113054	Dhrs2	DHRS2
UF_Ppr_AF_111452	dhrs3b	Dhrs3	DHRS3
UF_Ppr_AF_104196	dhrs7	Dhrs7	DHRS7
UF_Ppr_AM_119540	dhx32a	Dhx32	DHX32
UF_Ppr_AF_114165	dhx33	Dhx33	DHX33
UF_Ppr_AF_101830	dhx36	Dhx36	DHX36
UF_Ppr_AF_110799	dhx37	Dhx37	DHX37
UF_Ppr_AF_115568	dhx40	Dhx40	DHX40
UF_Ppr_AF_116064	diaph3	Diaph3	DIAPH3
UF_Ppr_AF_103029	dicer1	Dicer1	DICER1
UF_Ppr_AF_110501	dido1	Dido1	DIDO1
UF_Ppr_AF_104513	si:ch73-181d5.4	Dido1	DIDO1
UF_Ppr_AF_100704	dio1	Dio1	DIO1
UF_Ppr_AF_117254	dio2	Dio2	DIO2
UF_Ppr_AF_103943	dip2ba	Dip2b	DIP2B
UF_Ppr_AM_120004	dip2ca	Dip2c	DIP2C
UF_Ppr_AF_115023	dipk1aa	Dipk1a	DIPK1A
UF_Ppr_AF_106451	dipk1c	Dipk1c	DIPK1C
UF_Ppr_AF_111733	dipk2aa	Dipk2a	DIPK2A
UF_Ppr_AF_113330	dipk2ab	Dipk2a	DIPK2A
UF_Ppr_AF_102195	dis3	Dis3	DIS3
UF_Ppr_AF_115522	dis3l	Dis3l	DIS3L
UF_Ppr_AM_120360	dis3l2	Dis3l2	DIS3L2
UF_Ppr_AF_106389	dis3l2	Dis3l2	DIS3L2
UF_Ppr_AF_109645	disc1	Disc1	DISC1
UF_Ppr_AF_105746	disp1	Disp1	DISP1
UF_Ppr_AF_103549	dlat	Dlat	DLAT
UF_Ppr_AF_100734	dldh	Dld	DLD
UF_Ppr_AF_100006	dlec1	Dlec1	DLEC1
UF_Ppr_AF_106288	dlg1	Dlg1	DLG1
UF_Ppr_AF_114123	dlg1l	Dlg1	DLG1
UF_Ppr_AF_109094	dlg3	Dlg3	DLG3
UF_Ppr_AF_117495	dlg3	Dlg3	DLG3
UF_Ppr_AF_116455	dlg4b	Dlg4	DLG4
UF_Ppr_AF_114170	dlgap4a	Dlgap4	DLGAP4
UF_Ppr_AF_106614	dll4	Dll4	DLL4
UF_Ppr_AF_111504	dlst	Dlst	DLST
UF_Ppr_AF_100026	dlst	Dlst	DLST
UF_Ppr_AF_103559	dlx1a	Dlx1	DLX1
UF_Ppr_AF_113640	dlx3b	Dlx3	DLX3
UF_Ppr_AM_119555	dlx3b	Dlx3	DLX3
UF_Ppr_AF_101632	dlx5a	Dlx5	DLX5
UF_Ppr_AF_107529	dlx6a	Dlx6	DLX6
UF_Ppr_AF_101471	dmbx1a	Dmbx1	DMBX1
UF_Ppr_AF_105877	dmbx1a	Dmbx1	DMBX1
UF_Ppr_AF_115280	dmd	Dmd	DMD
UF_Ppr_AF_105989	dmgdh	Dmgdh	DMGDH
UF_Ppr_AF_115418	dmrt1	Dmrt1	DMRT1
UF_Ppr_AF_101888	dmrt2a	Dmrt2	DMRT2
UF_Ppr_AF_102102	dmtf1	Dmtf1	DMTF1
UF_Ppr_AF_103377	dmxl2	Dmxl2	DMXL2
UF_Ppr_AF_112828	dnaaf1	Dnaaf1	DNAAF1
UF_Ppr_AF_105006	dnaaf3	Dnaaf3	DNAAF3
UF_Ppr_AF_118802	si:ch211-194c3.5	Dnaaf9
UF_Ppr_AM_119258	si:ch211-194c3.5	Dnaaf9
UF_Ppr_AF_100837	dnah1	Dnah1	DNAH1
UF_Ppr_AF_118328	si:dkeyp-86b9.1	Dnah10	DNAH10
UF_Ppr_AF_104833	dnah2	Dnah2	DNAH2
UF_Ppr_AF_112892	dnah3	Dnah3	DNAH3
UF_Ppr_AF_104068	dnah5l	Dnah8	DNAH8
UF_Ppr_AF_107593	wdr78	Dnai4
UF_Ppr_AF_113760	dnaja2a	Dnaja2	DNAJA2
UF_Ppr_AF_111390	dnajb1b	Dnajb1	DNAJB1
UF_Ppr_AF_107690	dnajb12a	Dnajb12	DNAJB12
UF_Ppr_AF_106628	zgc:122979	Dnajb5	DNAJB5
UF_Ppr_AF_104703	dnajc14	Dnajc14	DNAJC14
UF_Ppr_AF_108967	dnajc16l	Dnajc16	DNAJC16
UF_Ppr_AF_115216	dnajc18	Dnajc18	DNAJC18
UF_Ppr_AF_101194	dnajc2	Dnajc2	DNAJC2
UF_Ppr_AF_104711	dnajc21	Dnajc21	DNAJC21
UF_Ppr_AF_103552	dnajc21	Dnajc21	DNAJC21
UF_Ppr_AF_109727	dnajc24	Dnajc24	DNAJC24
UF_Ppr_AF_111417	dnajc3a	Dnajc3	DNAJC3
UF_Ppr_AF_104387	dnajc3b	Dnajc3	DNAJC3
UF_Ppr_AF_108493	dnajc3b	Dnajc3	DNAJC3
UF_Ppr_AF_105003	dnajc4	Dnajc4	DNAJC4
UF_Ppr_AF_115842	dnajc5aa	Dnajc5	DNAJC5
UF_Ppr_AF_113644	dnajc5ab	Dnajc5	DNAJC5
UF_Ppr_AF_100376	dnajc5ga	Dnajc5g	DNAJC5G
UF_Ppr_AF_109735	dnajc7	Dnajc7	DNAJC7
UF_Ppr_AF_100619	dnali1	Dnali1	DNALI1
UF_Ppr_AF_102564	dnase1l4.2	Dnase1	DNASE1
UF_Ppr_AF_101996	dnm1l	Dnm1l	DNM1L
UF_Ppr_AF_106541	dnm3a	Dnm3	DNM3
UF_Ppr_AF_112638	dnm3a	Dnm3	DNM3
UF_Ppr_AF_105355	si:dkey-91i10.2	Dnmbp	DNMBP
UF_Ppr_AF_113761	dnmbp	Dnmbp	DNMBP
UF_Ppr_AF_112531	dnmt1	Dnmt1	DNMT1
UF_Ppr_AF_105326	dnmt3ab	Dnmt3a	DNMT3A
UF_Ppr_AF_114728	dnmt3ab	Dnmt3a	DNMT3A
UF_Ppr_AF_115948	dnmt3ab	Dnmt3a	DNMT3A
UF_Ppr_AF_103188	dnmt3bb.2	Dnmt3a	DNMT3A
UF_Ppr_AF_106756	dnmt3bb.2	Dnmt3a	DNMT3A
UF_Ppr_AF_110948	dnttip2	Dnttip2	DNTTIP2
UF_Ppr_AF_111926	doc2a	Doc2a	DOC2A
UF_Ppr_AF_107280	doc2d	Doc2g	DOC2A
UF_Ppr_AF_107817	dock11	Dock11	DOCK11
UF_Ppr_AF_101307	dock5	Dock5	DOCK5
UF_Ppr_AF_111611	dock6	Dock6	DOCK6
UF_Ppr_AF_108215	dock8	Dock8	DOCK8
UF_Ppr_AF_105291	dok1b	Dok1	DOK1
UF_Ppr_AM_120093	dok6	Dok6	DOK6
UF_Ppr_AF_102409	dok7	Dok7	DOK7
UF_Ppr_AF_113825	dolpp1	Dolpp1	DOLPP1
UF_Ppr_AF_108152	dop1a	Dop1a	DOP1A
UF_Ppr_AF_108383	dop1b	Dop1b	DOP1B
UF_Ppr_AF_106214	dpagt1	Dpagt1	DPAGT1
UF_Ppr_AF_109401	dpep2	Dpep2	DPEP2
UF_Ppr_AF_116685	dpf1	Dpf1	DPF1
UF_Ppr_AF_116174	dpf2l	Dpf2	DPF2
UF_Ppr_AF_116441	dpf2l	Dpf2	DPF2
UF_Ppr_AF_117061	dph1	Dph1	DPH1
UF_Ppr_AF_105979	dph5	Dph5	DPH5
UF_Ppr_AF_112146	dph6	Dph6	DPH6
UF_Ppr_AF_107476	dpp3	Dpp3	DPP3
UF_Ppr_AF_111131	dpp6b	Dpp6	DPP6
UF_Ppr_AF_116713	dpp6b	Dpp6	DPP6
UF_Ppr_AF_104362	dpp7	Dpp7	DPP7
UF_Ppr_AF_102329	dpp9	Dpp9	DPP9
UF_Ppr_AF_109208	dpysl4	Dpysl4	DPYSL4
UF_Ppr_AF_115774	zgc:103559	Dpysl4	DPYSL4
UF_Ppr_AF_104553	dpysl5a	Dpysl5	DPYSL5
UF_Ppr_AF_100694	dpysl5a	Dpysl5	DPYSL5
UF_Ppr_AF_102390	dr1	Dr1	DR1
UF_Ppr_AF_111181	dr1	Dr1	DR1
UF_Ppr_AF_108367	drc1	Drc1	DRC1
UF_Ppr_AF_104845	drd2a	Drd2	DRD2
UF_Ppr_AF_117537	drd4a	Drd4	DRD4
UF_Ppr_AF_114231	drg2	Drg2	DRG2
UF_Ppr_AF_114447	drosha	Drosha	DROSHA
UF_Ppr_AF_115541	drosha	Drosha	DROSHA
UF_Ppr_AF_108167	dscc1	Dscc1	DSCC1
UF_Ppr_AF_106162	dse	Dse	DSE
UF_Ppr_AF_110650	dse	Dse	DSE
UF_Ppr_AF_104669	dspa	Dsp	DSP
UF_Ppr_AF_105250	dstyk	Dstyk	DSTYK
UF_Ppr_AF_111041	dtnba	Dtnb	DTNB
UF_Ppr_AF_105926	DTX3	Dtx3	DTX3
UF_Ppr_AF_115820	si:dkey-40c23.2	Dtx3l	DTX3L
UF_Ppr_AF_105885	dtx4a	Dtx4	DTX4
UF_Ppr_AF_105981	dtymk	Dtymk	DTYMK
UF_Ppr_AF_106952	duox	Duox1	DUOX1
UF_Ppr_AF_117961	dus1l	Dus1l	DUS1L
UF_Ppr_AF_106926	dus2	Dus2	DUS2
UF_Ppr_AF_108727	dus3l	Dus3l	DUS3L
UF_Ppr_AF_102875	dusp1	Dusp1	DUSP1
UF_Ppr_AF_113569	dusp1	Dusp1	DUSP1
UF_Ppr_AF_111017	dusp11	Dusp11	DUSP11
UF_Ppr_AM_119944	dusp12	Dusp12	DUSP12
UF_Ppr_AF_115787	dusp2	Dusp2	DUSP2
UF_Ppr_AF_109770	dusp27	Dusp27	STYXL2
UF_Ppr_AF_100005	dusp4	Dusp4	DUSP4
UF_Ppr_AF_115293	dusp5	Dusp5	DUSP5
UF_Ppr_AF_115946	dusp6	Dusp6	DUSP6
UF_Ppr_AF_112622	si:ch211-195b15.8	Dusp8	DUSP8
UF_Ppr_AF_117681	dvl1b	Dvl1	DVL1
UF_Ppr_AF_109484	dvl1a	Dvl1	DVL1
UF_Ppr_AF_115391	dvl3a	Dvl3	DVL3
UF_Ppr_AF_117948	dym	Dym	DYM
UF_Ppr_AF_112207	dync1i2a	Dync1i2	DYNC1I2
UF_Ppr_AF_110639	dync1i2a	Dync1i2	DYNC1I2
UF_Ppr_AF_113278	dync1li1	Dync1li1	DYNC1LI1
UF_Ppr_AF_113892	dync1li2	Dync1li2	DYNC1LI2
UF_Ppr_AF_100569	DYNC2H1	Dync2h1	DYNC2H1
UF_Ppr_AF_113411	DYNC2H1	Dync2h1	DYNC2H1
UF_Ppr_AF_109341	wdr60	Dync2i1
UF_Ppr_AF_105087	dynll2a	Dynll2	DYNLL2
UF_Ppr_AF_104994	dynlrb1	Dynlrb1	DYNLRB1
UF_Ppr_AF_105047	dyrk1ab	Dyrk1a	DYRK1A
UF_Ppr_AF_119078	dyrk1aa	Dyrk1a	DYRK1A
UF_Ppr_AF_106480	dyrk1aa	Dyrk1a	DYRK1A
UF_Ppr_AF_104819	dyrk4	Dyrk4	DYRK4
UF_Ppr_AF_116579	dyrk4	Dyrk4	DYRK4
UF_Ppr_AF_105687	dysf	Dysf	DYSF
UF_Ppr_AF_100710	dytn	Dytn	DYTN
UF_Ppr_AF_118739	dzank1	Dzank1	DZANK1
UF_Ppr_AF_118795	dzip1	Dzip1	DZIP1
UF_Ppr_AF_103378	dzip1l	Dzip1l	DZIP1L
UF_Ppr_AF_113321	dzip1l	Dzip1l	DZIP1L
UF_Ppr_AF_109973	e2f1	E2f1	E2F1
UF_Ppr_AF_101286	si:ch211-160f23.5	E2f2	E2F2
UF_Ppr_AF_115401	e2f3	E2f3	E2F3
UF_Ppr_AF_101212	e2f4	E2f4	E2F4
UF_Ppr_AF_112416	e2f5	E2f5	E2F5
UF_Ppr_AF_100539	si:ch211-195d17.2	E2f6	E2F6
UF_Ppr_AF_105276	e2f7	E2f7	E2F7
UF_Ppr_AF_110545	e4f1	E4f1	E4F1
UF_Ppr_AF_115149	eaf2	Eaf2	EAF2
UF_Ppr_AF_116916	eapp	Eapp	EAPP
UF_Ppr_AF_106936	ebf2	Ebf2	EBF2
UF_Ppr_AF_117579	ebf2	Ebf2	EBF2
UF_Ppr_AF_107024	ecel1	Ecel1	ECEL1
UF_Ppr_AF_115996	echdc3	Echdc3	ECHDC3
UF_Ppr_AF_116536	ecpas	Ecpas	ECPAS
UF_Ppr_AF_118892	ect2	Ect2	ECT2
UF_Ppr_AF_106820	ccdc28a	Ect2l	ECT2L
UF_Ppr_AF_117786	edaradd	Edaradd	EDARADD
UF_Ppr_AF_104549	edc3	Edc3	EDC3
UF_Ppr_AF_118495	edc4	Edc4	EDC4
UF_Ppr_AF_116862	edem1	Edem1	EDEM1
UF_Ppr_AF_104353	edem2	Edem2	EDEM2
UF_Ppr_AF_105119	edem3	Edem3	EDEM3
UF_Ppr_AF_105078	edf1	Edf1	EDF1
UF_Ppr_AF_100292	ednraa	Ednra	EDNRA
UF_Ppr_AF_100477	ednrba	Ednrb	EDNRB
UF_Ppr_AF_105621	eea1	Eea1	EEA1
UF_Ppr_AF_116879	eef1a1l1	Eef1a1	EEF1A1
UF_Ppr_AF_109194	eef1a2	Eef1a2	EEF1A2
UF_Ppr_AF_111391	eef1b2	Eef1b2	EEF1B2
UF_Ppr_AF_102007	eef1b2	Eef1b2	EEF1B2
UF_Ppr_AF_104582	eef1db	Eef1d	EEF1D
UF_Ppr_AF_106001	eef1g	Eef1g	EEF1G
UF_Ppr_AF_105091	eef2k	Eef2k	EEF2K
UF_Ppr_AF_114924	eef2kmt	Eef2kmt	EEF2KMT
UF_Ppr_AF_108174	eefsec	Eefsec	EEFSEC
UF_Ppr_AF_101561	eepd1	Eepd1	EEPD1
UF_Ppr_AF_102593	efcab1	Efcab1	EFCAB1
UF_Ppr_AF_118922	efcab1	Efcab1	EFCAB1
UF_Ppr_AF_100762	efcab7	Efcab7	EFCAB7
UF_Ppr_AF_113255	efemp2b	Efemp2	EFEMP2
UF_Ppr_AF_117445	efemp2a	Efemp2	EFEMP2
UF_Ppr_AF_112449	efemp2a	Efemp2	EFEMP2
UF_Ppr_AF_101057	efhb	Efhb	EFHB
UF_Ppr_AF_111353	efhb	Efhb	EFHB
UF_Ppr_AF_101686	efhd2	Efhd2	EFHD2
UF_Ppr_AF_116268	efna2a	Efna2	EFNA2
UF_Ppr_AF_118215	efna3a	Efna3	EFNA3
UF_Ppr_AF_100057	efna3a	Efna3	EFNA3
UF_Ppr_AF_100469	efna3b	Efna3	EFNA3
UF_Ppr_AF_113240	efnb2a	Efnb2	EFNB2
UF_Ppr_AF_106988	efnb3b	Efnb3	EFNB3
UF_Ppr_AF_100760	efr3ba	Efr3b	EFR3B
UF_Ppr_AF_111921	efs	Efs	EFS
UF_Ppr_AF_110227	efs	Efs	EFS
UF_Ppr_AF_101043	EGFLAM	Egflam	EGFLAM
UF_Ppr_AF_108468	egfra	Egfr	EGFR
UF_Ppr_AF_117088	egln3	Egln3	EGLN3
UF_Ppr_AF_112239	egr1	Egr1	EGR1
UF_Ppr_AF_102797	egr3	Egr3	EGR3
UF_Ppr_AF_106069	egr4	Egr4	EGR4
UF_Ppr_AM_119343	ehbp1l1a	Ehbp1l1	EHBP1L1
UF_Ppr_AF_114072	ehd1b	Ehd1	EHD1
UF_Ppr_AF_116124	ehd1b	Ehd1	EHD1
UF_Ppr_AF_114932	ehd2b	Ehd2	EHD2
UF_Ppr_AF_107884	si:ch211-11k18.4	Ehd4	EHD4
UF_Ppr_AF_110570	ehf	Ehf	EHF
UF_Ppr_AF_107709	ehhadh	Ehhadh	EHHADH
UF_Ppr_AF_108000	ehmt1a	Ehmt1	EHMT1
UF_Ppr_AF_104070	ehmt1b	Ehmt1	EHMT1
UF_Ppr_AF_119068	ehmt1a	Ehmt1	EHMT1
UF_Ppr_AF_114342	ei24	Ei24	EI24
UF_Ppr_AF_117549	eif1	Eif1	EIF1
UF_Ppr_AF_113347	pkz	Eif2ak2	EIF2AK2
UF_Ppr_AF_105204	eif2b2	Eif2b2	EIF2B2
UF_Ppr_AF_112387	eif2b3	Eif2b3	EIF2B3
UF_Ppr_AF_114751	gkup	Eif2b3	EIF2B3
UF_Ppr_AF_109164	eif2b4	Eif2b4	EIF2B4
UF_Ppr_AF_100606	eif2b4	Eif2b4	EIF2B4
UF_Ppr_AF_102998	eif2b4	Eif2b4	EIF2B4
UF_Ppr_AF_114849	eif2b5	Eif2b5	EIF2B5
UF_Ppr_AF_109051	eif2s1a	Eif2s1	EIF2S1
UF_Ppr_AF_108811	eif2s1a	Eif2s1	EIF2S1
UF_Ppr_AF_108254	eif2s2	Eif2s2	EIF2S2
UF_Ppr_AF_109914	eif2s3	Eif2s3x	EIF2S3
UF_Ppr_AF_112785	eif3s10	Eif3a	EIF3A
UF_Ppr_AF_114116	eif3ba	Eif3b	EIF3B
UF_Ppr_AF_108548	eif3c	Eif3c	EIF3C
UF_Ppr_AF_118509	eif3d	Eif3d	EIF3D
UF_Ppr_AF_112212	eif3ea	Eif3e	EIF3E
UF_Ppr_AF_112710	eif3f	Eif3f	EIF3F
UF_Ppr_AF_111607	eif3jb	Eif3j1	EIF3J
UF_Ppr_AF_119020	eif3ja	Eif3j2	EIF3J
UF_Ppr_AF_102460	eif3k	Eif3k	EIF3K
UF_Ppr_AF_115158	eif3s6ip	Eif3l	EIF3L
UF_Ppr_AF_114143	eif4a1a	Eif4a1	EIF4A1
UF_Ppr_AF_100307	eif4a3	Eif4a3	EIF4A3
UF_Ppr_AF_110588	eif4bb	Eif4b	EIF4B
UF_Ppr_AF_112521	eif4e1c	Eif4e	EIF4E
UF_Ppr_AF_100806	eif4e2	Eif4e2	EIF4E2
UF_Ppr_AF_104200	eif4e3	Eif4e3	EIF4E3
UF_Ppr_AF_113889	eif4ebp1	Eif4ebp1	EIF4EBP1
UF_Ppr_AF_113802	eif4ebp2	Eif4ebp2	EIF4EBP2
UF_Ppr_AF_118158	eif4enif1	Eif4enif1	EIF4ENIF1
UF_Ppr_AF_118250	eif4g1a	Eif4g1	EIF4G1
UF_Ppr_AF_114284	eif4g2b	Eif4g2	EIF4G2
UF_Ppr_AF_106769	eif4g3a	Eif4g3	EIF4G3
UF_Ppr_AF_118590	eif4h	Eif4h	EIF4H
UF_Ppr_AF_107506	eif5	Eif5	EIF5
UF_Ppr_AF_101600	eif5a2	Eif5a	EIF5A
UF_Ppr_AF_108449	eif5b	Eif5b	EIF5B
UF_Ppr_AF_111215	eipr1	Eipr1	EIPR1
[truncated: 6,299 more rows]
